# Supplementary material for: Identifying Phased Mutations and Complex Rearrangements in Human Prostate Cancer Cell Lines through Linked-Read Whole-Genome Sequencing
Source: Oxford University Press journal article supplement (doi:10.1158/1541-7786.mcr-21-0683), 2022-04-22
Supplement: mcr-21-0683_supplementary_tables_1-13_suppst1-13.xlsx [file mcr-21-0683_supplementary_tables_1-13_suppst1-13.xlsx]

## Sheet: Table S1
Table S1: Origins, characteristics, sources, and authentication information of cell lines used in this study
Cell Line	Origin1	Reference	Source	STR Genotype (%match)2	Mycoplasma	Passage	RRID
CWR22Rv1	Primary prostate carcinoma	Gregory et al., 2001	American Type Culture Collection	100	Negative	<5	CVCL_1045
DU145	Metastatic prostate carinoma to the brain	Stone et al., 1978	American Type Culture Collection	100	Negative	<5	CVCL_0105
LAPC4	Androgen responsive metastatic prostate carinoma to the lymph node	Klein et al., 1997	Charles Sawyer' Lab, UCLA	78	Negative	5-10	CVCL_4744
LAPC4-CR	Castrate resistant sub-clone of LAPC4 dedrived from xenografts in castrate mice	Haffner et al., 2021	Johns Hopkins Biorepository	78*	Negative	2	CVCL_A0BW
LNCaP	Androgen responsive metastatic prostate carinoma to the lymph node	Horoszewicz et al., 1983	American Type Culture Collection	100	Negative	<5	CVCL_1379
LNCaP_Abl	Castrate resistant sub-clone of LnCAP dedrived from androgen depleted cell culture	Culig et al., 1999	Zoran Culig, Innsbruck Medical University	100*	Negative	5-10	CVCL_4793
LNCaP_C42b	Castrate resistant sub-clone of LnCAP dedrived from xenografts in castrate mice	Thalmann et al., 2000	UroCor, Oklahoma City, OK	89	Negative	5-10	CVCL_4784
MDA-PCa-2b	Androgen-responsive metastatic prostate carcinoma to the bone	Navone et al., 1997	American Type Culture Collection	100	Negative	2	CVCL_4748
PC3	Metastatic prostate adenocarcinoma to the bone	Kaighn et al., 1979	National Cancer Institute	100	Negative	<5	CVCL_0035
RWPE-1	Prostatic epithelial cell lines immortalized by human papillomavirus 18	Bello at al., 1997	American Type Culture Collection	100	Negative	<5	CVCL_3791
VCaP	Androgen responsive metastatic prostate carcinoma to the vertebral bone	Korenchuk et al., 2001	American Type Culture Collection	100	Negative	<5	CVCL_2235
VCaP-CR	Castrate resistant sub-clone of VCAP dedrived from xenografts in castrate mice	Haffner et al., 2021	Johns Hopkins Biorepository	100*	Negative	2	CVCL_A0BX
1 References (PMID: 15643172, 14518029, 34402095, 10496349, 10881018)
2 as calculated per second algorithm outlined by Capes-Davis et al (PMID: 23136038).
*Compared to parental

## Sheet: Table S2
Table S2: HMW DNA extraction QC, sequencing depth, and Longranger output metrics for each cell line
Cell line	Percent DNA in the 60kb peak (%)1	Mean Depth	Longest Phased Block (Mb)	N50 linked reads per molecule2	Percent genes < 100kb phased
CWR22Rv1	96.45	36.8	18.5	88	98.2
DU145	98.45	35	66.6	79	99
LAPC4	99.8	50.3	110.5	97	99.7
LAPC4-CR	99.02	36.4	110.2	55	99.5
LNCaP	98.06	38	109.2	35	99.5
LNCaP_Abl	97.19	48.5	93.6	56	99.6
LNCaP_C42b	82.91	54.2	76.9	84	99.5
MDA-PCa-2b	99.63	35.3	11.6	94	97.7
PC3	96.81	51	110.4	80	99.5
RWPE-1	97.83	47.9	42.3	56	99.4
VCaP	98.66	35.2	24.7	53	99
VCaP-CR	97.81	51.5	28.4	66	99.4
1 As measured by Agilent TapeStation 4200 system, defined as area under the curve within or beyond the 60kb ladder
2 Median number of 10X barcoded reads generated from a HMW DNA molecule

## Sheet: Table S3 
Table S3: Allele fraction analysis between linked-read data and other data sets
		Allele Fraction analysis on 365 cancer-related genes				Allele Fraction analysis on all mutated genes				Allele Fraction analysis on 629 putative cancer driver genes
Cell_line	Passage number in WI dataset	Number of shared mutations	Number of mutations called by linked-read	WI_Percent shared mutations over linked-read (%)	WI_Pearson correlation coefficient in AF of shared mutations	Number of shared mutations	Number of mutations called by linked-read	CCLE_Percent shared mutations over linked-read (%)	CCLE_Pearson correlation coefficient in AF of shared mutations	Number of shared mutations	Number of mutations called by linked-read	CCLE_Percent shared mutations over linked-read (%)	CCLE_Pearson correlation coefficient in AF of shared mutations
LNCaP	64	276	309	89.3204	0.893912	2185	2768	78.9379	0.571049	128	167	76.6467	0.658366
VCaP	74	188	188	100	0.904205	71	272	26.1029	0.622568	3	12	25	0.616766
LAPC4	119	299	340	87.9412	0.919121
DU145	82	230	269	85.5019	0.946205	1828	2547	71.7707	0.86764	99	131	75.5725	0.872274
CWR22Rv1	161	247	278	88.8489	0.8413	1402	2013	69.6473	0.455685	98	140	70	0.520459
PC3	43	161	211	76.3033	0.77926
MDA-Pca-2b	60	253	285	88.7719	0.932986	997	1428	69.8179	0.596922	72	98	73.4694	0.795669
LNCaP_C42b	25	287	319	89.9687	0.93108
Median	69	250	281.5	88.8104	0.911663			69.8179	0.596922			73.4694	0.658366

## Sheet: Table S4
Table S4: Copy number concordance analysis between linked-read data and CCLE data or cell lines of other passages
Sample1	Sample2	Pearson correlation coefficient for gene copy number	Sample1	Sample2*	Pearson correlation coefficient of copy number
LNCaP_CCLE	LNCaP_Linked-read	0.737118	LNCaP_Linked-read	LNCaP_37_3X	0.786255
VCaP_CCLE	VCaP_Linked-read	0.711432	LNCaP_Linked-read	LNCaP_45_4X	0.742846
DU145_CCLE	DU145_Linked-read	0.743007	LNCaP_Linked-read	LNCaP_49_4X	0.881783
CWR22Rv1_CCLE	CWR22Rv1_Linked-read	0.673464	LNCaP_Linked-read	LNCaP_58_8X	0.825198
MDA-Pca-2b_CCLE	MDA-Pca-2b_Linked-read	0.653266	LNCaP_Linked-read	LNCaP_60_3X	0.892427
			LNCaP_Linked-read	LNCaP_Abl_Linked-read	0.769436
			LNCaP_Linked-read	LNCaP_C42b_Linked-read	0.720614
			LAPC4_Linked-read	LAPC4-CR_Linked-read	0.748816
			VCaP_Linked-read	VCaP-CR_Linked-read	0.811665
			CWR22Rv1_Linked-read	CWR22Rv1_37_5X	0.764658
			DU145_Linked-read	DU145_39_4X	0.843586
			PC3_Linked-read	PC3_39_3X	0.762727
* Double digit number following cell line name indicates experiment number and not passage number. All cell lines were of late passages (>20). Single digit number preceding X indicates sequencing coverage.

## Sheet: Table S5
Table S5: Microsatellite instability status, somatic mutation count, and somatic mutation rate for each cell line.
Cell line	Somatic mutations count1	Somatic mutation rate (SNV/Mbp)	Microsatellite instability status2
CWR22Rv1	37043	11.9494	high
DU145	21009	6.7771	high
LAPC4	39902	12.8716	high
LAPC4-CR	40924	13.2013	high
LNCaP	31729	10.2352	high
LNCaP_Abl	37914	12.2303	high
LNCaP_C42b	39001	12.581	high
MDA-PCa-2b	31095	10.0306	high
PC3	12454	4.01742	stable
RWPE-1	12683	4.09129	stable
VCaP	11361	3.66484	stable
VCaP-CR	12828	4.13806	stable
1Somatic mutations were defined as having Gnomad allele frequency of less than 0.1%.
2 As reported by The Cell Model Passports (PMID: 30260411) and Sun et al., 2006 (PMID:16388502)

## Sheet: Table S6
Table S6: Mutations on Homology-directed repair genes in this panel of 12 cell lines
Hugo_Symbol1	Chromosome1	Start_Position1	End_Position1	Variant_Classification1	Variant_Type1	Reference_Allele1	Cell_line1	HGVSc1	HGVSp_Short1	t_depth1	Allele1	gnomAD_AF1	GT1	Gene-level Haplotype2	Allele_Fraction
RAD54L	1	46739403	46739403	Missense_Mutation	SNP	C	LnCAP_C42b	c.1594C>A	p.L532M	40	A	NA	1|0	monoallelic	0.375
RAD51B	14	68290312	68290312	Missense_Mutation	SNP	C	LnCAP_C42b	c.52C>T	p.R18C	50	T	3.98e-05	1|0	monoallelic	0.6
CHEK2	22	29091797	29091797	Missense_Mutation	SNP	G	LnCAP_C42b	c.1289C>A	p.T430N	28	T	3.984e-06	0|1	monoallelic	0.571429
ATM	11	108150234	108150234	Missense_Mutation	SNP	A	CWR22v1	c.3301A>G	p.K1101E	16	G	NA	0|1	monoallelic	0.6875
BRCA2	13	32913920	32913920	Missense_Mutation	SNP	G	CWR22v1	c.5428G>A	p.V1810I	21	A	1.592e-05	0|1	biallelic_het	0.380952
BRCA2	13	32954022	32954023	Frameshift_Indel	INS	-	CWR22v1	c.9097dup	p.T3033Nfs*11	15	A	1.22e-05	1|0	biallelic_het	0.6
PALB2	16	23614974	23614974	Missense_Mutation	SNP	C	CWR22v1	c.3367G>A	p.V1123M	20	T	7.957e-06	0|1	monoallelic	0.3
BARD1	2	215610468	215610468	Frameshift_Indel	DEL	T	CWR22v1	c.1788del	p.K596Nfs*9	19	-	NA	0|1	monoallelic	0.421053
BRCA2	13	32918704	32918704	Missense_Mutation	SNP	C	DU145	c.6851C>T	p.S2284L	17	T	NA	1|1	biallelic_hom	1
BRCA1	17	41244664	41244664	Missense_Mutation	SNP	C	DU145	c.2884G>A	p.E962K	35	T	1.194e-05	0|1	monoallelic	0.2
ATM	11	108172510	108172510	Frameshift_Indel	DEL	A	LAPC4CR	c.5318del	p.K1773Sfs*3	24	-	NA	0|1	multi_monoallelic	0.208333
ATM	11	108175580	108175580	Splice_Site	SNP	G	LAPC4CR	c.5674+1G>T	p.X1892_splice	28	T	NA	0|1	multi_monoallelic	0.178571
BRCA2	13	32936831	32936831	Splice_Site	SNP	G	LAPC4CR	c.7976+1G>A	p.X2659_splice	19	A	NA	0|1	monoallelic	0.473684
PALB2	16	23646674	23646674	Missense_Mutation	SNP	A	LAPC4CR	c.1193T>C	p.V398A	19	G	NA	1|0	monoallelic	0.526316
CDK12	17	37627297	37627297	Frameshift_Indel	DEL	G	LAPC4CR	c.1213del	p.E405Kfs*31	5	-	NA	1|0	biallelic_het	0.6
CDK12	17	37687472	37687472	Frameshift_Indel	DEL	G	LAPC4CR	c.4382del	p.G1461Afs*38	24	-	NA	0|1	biallelic_het	0.416667
RAD51C	17	56780626	56780626	Missense_Mutation	SNP	G	LAPC4CR	c.641G>A	p.R214H	25	A	7.961e-06	0|1	monoallelic	0.68
ATM	11	108175580	108175580	Splice_Site	SNP	G	LAPC4	c.5674+1G>T	p.X1892_splice	58	T	NA	0|1	monoallelic	0.551724
BRCA2	13	32936831	32936831	Splice_Site	SNP	G	LAPC4	c.7976+1G>A	p.X2659_splice	50	A	NA	0|1	monoallelic	0.6
PALB2	16	23646674	23646674	Missense_Mutation	SNP	A	LAPC4	c.1193T>C	p.V398A	26	G	NA	0|1	monoallelic	0.769231
CDK12	17	37687472	37687472	Frameshift_Indel	DEL	G	LAPC4	c.4382del	p.G1461Afs*38	31	-	NA	0|1	monoallelic	0.354839
RAD51C	17	56780626	56780626	Missense_Mutation	SNP	G	LAPC4	c.641G>A	p.R214H	42	A	7.961e-06	1|0	monoallelic	0.571429
RAD54L	1	46739403	46739403	Missense_Mutation	SNP	C	LnCAP_Abl	c.1594C>A	p.L532M	34	A	NA	1|0	monoallelic	0.5
ATM	11	108164144	108164144	Missense_Mutation	SNP	G	LnCAP_Abl	c.4716G>T	p.K1572N	46	T	NA	0|1	multi_monoallelic	0.326087
ATM	11	108198370	108198370	Splice_Site	SNP	A	LnCAP_Abl	c.6976-2A>G	p.X2326_splice	46	G	NA	0|1	multi_monoallelic	0.282609
RAD51B	14	68290312	68290312	Missense_Mutation	SNP	C	LnCAP_Abl	c.52C>T	p.R18C	47	T	3.98e-05	0|1	monoallelic	0.574468
BRIP1	17	59878789	59878789	Missense_Mutation	SNP	T	LnCAP_Abl	c.965A>G	p.Q322R	53	C	NA	0|1	monoallelic	0.301887
CHEK2	22	29091797	29091797	Missense_Mutation	SNP	G	LnCAP_Abl	c.1289C>A	p.T430N	33	T	3.984e-06	1|0	monoallelic	0.545455
RAD54L	1	46739403	46739403	Missense_Mutation	SNP	C	LnCAP	c.1594C>A	p.L532M	25	A	NA	1|0	monoallelic	0.52
RAD51B	14	68290312	68290312	Missense_Mutation	SNP	C	LnCAP	c.52C>T	p.R18C	33	T	3.98e-05	0|1	monoallelic	0.454545
CHEK2	22	29091797	29091797	Missense_Mutation	SNP	G	LnCAP	c.1289C>A	p.T430N	24	T	3.984e-06	1|0	monoallelic	0.541667
PALB2	16	23646533	23646533	Frameshift_Indel	DEL	T	MDA-Pca-2b	c.1334del	p.K445Rfs*7	28	-	NA	0|1	monoallelic	0.607143
BARD1	2	215646085	215646085	Frameshift_Indel	DEL	T	MDA-Pca-2b	c.513del	p.D172Mfs*40	41	-	NA	1|0	monoallelic	0.439024
1 MAF column specification as annotated by Vcf2maf (2020, doi:10.5281)
2 Gene-level Haplotype of a gene provides mutational status of each allele and distinguishes between a gene having multiple heterozygous mutations on the same versus opposite alleles.

## Sheet: Table S7
Table S7: Somatic mutations in Cosmic-Longtail gene list found in this panel of 12 PCa cell lines, with putative driver mutations being deleterious (frameshift, splice site, or nonsense) or inframe indels and missense mutations found in Cancer Mutation Census (CMC) list (PMID: 32461654). Any missense or inframe indel mutation not found in CMC is potentially a passenger. Column headings are accord…
Hugo_Symbol1	HGVSc1	HGVSp_Short1	COSMIC_SAMPLE_MUTATED3	Cell_line	Chromosome1	Start_Position 1	End_Position 1	Variant_Classification 1	Variant_Type 1	Reference_Allele 1	t_depth 1	t_ref_count 1	t_alt_count 1	Allele 1	Gene-level Haplotype 2	MUTATION_URL3	LEGACY_MUTATION_ID 3	GENOMIC_MUTATION_ID3	COSMIC_SAMPLE_TESTED3	DISEASE3
TNFRSF14	c.253G>A	p.A85T	NA	LNCaP_C42b	1	2489856	2489856	Missense_Mutation	SNP	G	36	19	17	A	monoallelic	NA	NA	NA	NA	NA
PRDM16	c.1912G>T	p.G638C	NA	LNCaP_C42b	1	3328673	3328673	Missense_Mutation	SNP	G	39	20	19	T	multi_monoallelic	NA	NA	NA	NA	NA
PRDM16	c.2254A>G	p.K752E	NA	LNCaP_C42b	1	3329015	3329015	Missense_Mutation	SNP	A	57	33	24	G	multi_monoallelic	NA	NA	NA	NA	NA
RPL22	c.44del	p.K15Rfs*5	133	LNCaP_C42b	1	6257785	6257785	Frameshift_Indel	DEL	T	52	5	47	-	biallelic_hom	https://cancer.sanger.ac.uk/cosmic/mutation/overview?id=23549956	COSM179404	COSV52376836	38078	large_intestine/carcinoma/adenocarcinoma=68/2391=2.84%;stomach/carcinoma/intestinal_adenocarcinoma=12/97=12.37%;stomach/carcinoma/NS=22/559=3.94%;biliary_tract/carcinoma/NS=6/266=2.26%
SPEN	c.1880del	p.N627Tfs*182	NA	LNCaP_C42b	1	16254614	16254614	Frameshift_Indel	DEL	A	22	8	14	-	monoallelic	NA	NA	NA	NA	NA
ARID1A	c.854del	p.G285Efs*78	NA	LNCaP_C42b	1	27023744	27023744	Frameshift_Indel	DEL	G	36	16	20	-	monoallelic	NA	NA	NA	NA	NA
LCK	c.427G>T	p.A143S	NA	LNCaP_C42b	1	32741219	32741219	Missense_Mutation	SNP	G	50	30	20	T	monoallelic	NA	NA	NA	NA	NA
CSF3R	c.1404dup	p.S469Qfs*5	5	LNCaP_C42b	1	36935322	36935323	Frameshift_Indel	INS	-	53	27	26	G	monoallelic	https://cancer.sanger.ac.uk/cosmic/mutation/overview?id=38663813	COSM2081600	COSV58966317	60124
MPL	c.770G>A	p.R257H	2	LNCaP_C42b	1	43805714	43805714	Missense_Mutation	SNP	G	46	29	17	A	biallelic_het	https://cancer.sanger.ac.uk/cosmic/mutation/overview?id=36966910	COSM2170440	COSV65244545	38078
MPL	c.824C>T	p.P275L	NA	LNCaP_C42b	1	43805768	43805768	Missense_Mutation	SNP	C	50	20	30	T	biallelic_het	NA	NA	NA	NA	NA
JAK1	c.1289dup	p.L431Vfs*22	18	LNCaP_C42b	1	65325832	65325833	Frameshift_Indel	INS	-	40	22	18	G	biallelic_het	https://cancer.sanger.ac.uk/cosmic/mutation/overview?id=29880993	COSM41842	COSV61087635	65273
JAK1	c.425del	p.K142Rfs*26	12	LNCaP_C42b	1	65339111	65339111	Frameshift_Indel	DEL	T	42	14	28	-	biallelic_het	https://cancer.sanger.ac.uk/cosmic/mutation/overview?id=29882237	COSM1639943	COSV61087645	65273
RPL5	c.130dup	p.Y44Lfs*69	NA	LNCaP_C42b	1	93299157	93299158	Frameshift_Indel	INS	-	37	19	18	T	monoallelic	NA	NA	NA	NA	NA
NOTCH2	c.5311-1G>T	p.X1771_splice	NA	LNCaP_C42b	1	120463021	120463021	Splice_Site	SNP	C	54	23	31	A	multi_monoallelic	NA	NA	NA	NA	NA
NOTCH2	c.629C>T	p.P210L	NA	LNCaP_C42b	1	120539742	120539742	Missense_Mutation	SNP	G	53	43	10	A	multi_monoallelic	NA	NA	NA	NA	NA
NOTCH2	c.316T>C	p.S106P	NA	LNCaP_C42b	1	120548051	120548051	Missense_Mutation	SNP	A	79	66	13	G	multi_monoallelic	NA	NA	NA	NA	NA
BCL9	c.2065_2067del	p.S689del	NA	LNCaP_C42b	1	147092024	147092026	Inframe_Indel	DEL	CTT	40	20	20	-	monoallelic	NA	NA	NA	NA	NA
ARNT	c.37G>T	p.D13Y	NA	LNCaP_C42b	1	150830925	150830925	Missense_Mutation	SNP	C	15	11	4	A	monoallelic	NA	NA	NA	NA	NA
SETDB1	c.2920G>A	p.E974K	NA	LNCaP_C42b	1	150933458	150933458	Missense_Mutation	SNP	G	32	17	15	A	monoallelic	NA	NA	NA	NA	NA
ETV3	c.1416del	p.K473Sfs*4	3	LNCaP_C42b	1	157094756	157094756	Frameshift_Indel	DEL	G	36	17	19	-	monoallelic	https://cancer.sanger.ac.uk/cosmic/mutation/overview?id=35912026	COSM1984959	COSV63864335	38078
ABL2	c.404G>A	p.R135Q	NA	LNCaP_C42b	1	179095795	179095795	Missense_Mutation	SNP	C	55	22	33	T	monoallelic	NA	NA	NA	NA	NA
PTPRC	c.2159G>T	p.R720M	NA	LNCaP_C42b	1	198703341	198703341	Missense_Mutation	SNP	G	40	17	23	T	monoallelic	NA	NA	NA	NA	NA
ABI1	c.1523A>T	p.D508V	NA	LNCaP_C42b	10	27037503	27037503	Missense_Mutation	SNP	T	42	21	21	A	multi_monoallelic	NA	NA	NA	NA	NA
ABI1	c.581G>A	p.R194Q	NA	LNCaP_C42b	10	27057919	27057919	Missense_Mutation	SNP	C	37	22	15	T	multi_monoallelic	NA	NA	NA	NA	NA
ABI1	c.569G>T	p.G190V	NA	LNCaP_C42b	10	27059183	27059183	Missense_Mutation	SNP	C	41	23	18	A	multi_monoallelic	NA	NA	NA	NA	NA
RET	c.230G>A	p.R77H	2	LNCaP_C42b	10	43596063	43596063	Missense_Mutation	SNP	G	81	36	45	A	biallelic_het	https://cancer.sanger.ac.uk/cosmic/mutation/overview?id=33977950	COSM294752	COSV60688178	38078
RET	c.2573T>C	p.I858T	NA	LNCaP_C42b	10	43615159	43615159	Missense_Mutation	SNP	T	52	33	19	C	biallelic_het	NA	NA	NA	NA	NA
KAT6B	c.5356G>A	p.E1786K	1	LNCaP_C42b	10	76789938	76789938	Missense_Mutation	SNP	G	48	19	29	A	monoallelic	https://cancer.sanger.ac.uk/cosmic/mutation/overview?id=24771038	COSM7103190	COSV54744157	38078
NUTM2D	c.325T>C	p.F109L	2	LNCaP_C42b	10	89120396	89120396	Missense_Mutation	SNP	T	16	0	16	C	biallelic_hom	https://cancer.sanger.ac.uk/cosmic/mutation/overview?id=48496950	COSM4591792	COSV67745869	38078
PTEN	c.17_18del	p.K6Rfs*4	NA	LNCaP_C42b	10	89624242	89624243	Frameshift_Indel	DEL	AA	13	0	13	-	biallelic_hom	NA	NA	NA	NA	NA
NUP98	c.536G>A	p.S179N	NA	LNCaP_C42b	11	3794929	3794929	Missense_Mutation	SNP	C	48	19	29	T	monoallelic	NA	NA	NA	NA	NA
MEN1	c.954T>A	p.Y318*	NA	LNCaP_C42b	11	64573814	64573814	Nonsense_Mutation	SNP	A	51	27	24	T	monoallelic	NA	NA	NA	NA	NA
BIRC3	c.905G>A	p.W302*	NA	LNCaP_C42b	11	102196248	102196248	Nonsense_Mutation	SNP	G	57	26	31	A	monoallelic	NA	NA	NA	NA	NA
POU2AF1	c.227C>T	p.A76V	1	LNCaP_C42b	11	111228399	111228399	Missense_Mutation	SNP	G	63	46	17	A	monoallelic	https://cancer.sanger.ac.uk/cosmic/mutation/overview?id=41898010	COSM5703873	COSV67577108	38078
USP28	c.2246C>A	p.A749D	NA	LNCaP_C42b	11	113679078	113679078	Missense_Mutation	SNP	G	71	45	26	T	monoallelic	NA	NA	NA	NA	NA
BCL9L	c.2656C>T	p.R886W	NA	LNCaP_C42b	11	118771796	118771796	Missense_Mutation	SNP	G	39	17	22	A	monoallelic	NA	NA	NA	NA	NA
ADAMTS8	c.62del	p.L21Rfs*55	NA	LNCaP_C42b	11	130298120	130298120	Frameshift_Indel	DEL	A	18	11	7	-	multi_monoallelic	NA	NA	NA	NA	NA
ADAMTS8	c.59_60del	p.L20Pfs*179	NA	LNCaP_C42b	11	130298122	130298123	Frameshift_Indel	DEL	CA	18	11	7	-	multi_monoallelic	NA	NA	NA	NA	NA
KDM5A	c.3597del	p.G1200Dfs*9	35	LNCaP_C42b	12	416953	416953	Frameshift_Indel	DEL	T	37	19	18	-	biallelic_het	https://cancer.sanger.ac.uk/cosmic/mutation/overview?id=44678327	COSM1180773	COSV66990113	54115	endometrium/carcinoma/endometrioid_carcinoma=4/95=4.21%
KDM5A	c.1906T>C	p.C636R	NA	LNCaP_C42b	12	438063	438063	Missense_Mutation	SNP	A	50	27	23	G	biallelic_het	NA	NA	NA	NA	NA
CHD4	c.2614G>A	p.V872M	NA	LNCaP_C42b	12	6702295	6702295	Missense_Mutation	SNP	C	50	26	24	T	monoallelic	NA	NA	NA	NA	NA
SMARCD1	c.866A>G	p.D289G	NA	LNCaP_C42b	12	50483761	50483761	Missense_Mutation	SNP	A	34	14	20	G	monoallelic	NA	NA	NA	NA	NA
ERBB3	c.531G>T	p.K177N	NA	LNCaP_C42b	12	56480424	56480424	Missense_Mutation	SNP	G	60	34	26	T	monoallelic	NA	NA	NA	NA	NA
CDK4	c.329C>T	p.P110L	NA	LNCaP_C42b	12	58145015	58145015	Missense_Mutation	SNP	G	23	10	13	A	monoallelic	NA	NA	NA	NA	NA
STAB2	c.4978C>T	p.R1660W	NA	LNCaP_C42b	12	104122669	104122669	Missense_Mutation	SNP	C	38	25	13	T	monoallelic	NA	NA	NA	NA	NA
NCOR2	c.5509_5517dup	p.S1837_G1839dup	27	LNCaP_C42b	12	124824721	124824722	Inframe_Indel	INS	-	39	0	39	GCCGCTGCT	biallelic_hom	https://cancer.sanger.ac.uk/cosmic/mutation/overview?id=45371441	COSM1359887	COSV62292510	41645
NCOR2	c.3178del	p.R1060Vfs*3	10	LNCaP_C42b	12	124841251	124841251	Frameshift_Indel	DEL	G	4	0	4	-	biallelic_hom	https://cancer.sanger.ac.uk/cosmic/mutation/overview?id=45374186	COSM1359907	COSV62294228	38078
NCOR2	c.1529_1531dup	p.Q510dup	12	LNCaP_C42b	12	124887058	124887059	Inframe_Indel	INS	-	52	26	26	GCT	biallelic_hom	https://cancer.sanger.ac.uk/cosmic/mutation/overview?id=45371257	COSM1476307	COSV62292713	38078	thyroid/other/neoplasm=4/15=26.67%
NCOR2	c.500T>C	p.L167P	3	LNCaP_C42b	12	124957589	124957589	Missense_Mutation	SNP	A	37	27	10	G	biallelic_hom	https://cancer.sanger.ac.uk/cosmic/mutation/overview?id=45379143	COSM2227173	COSV62295110	3567
FOXO1	c.281T>C	p.V94A	NA	LNCaP_C42b	13	41240069	41240069	Missense_Mutation	SNP	A	2	0	2	G	monoallelic	NA	NA	NA	NA	NA
ERCC5	c.3067C>A	p.L1023I	NA	LNCaP_C42b	13	103527759	103527759	Missense_Mutation	SNP	C	46	18	28	A	monoallelic	NA	NA	NA	NA	NA
NIN	c.2750A>G	p.Q917R	NA	LNCaP_C42b	14	51224998	51224998	Missense_Mutation	SNP	T	50	24	26	C	monoallelic	NA	NA	NA	NA	NA
RAD51B	c.52C>T	p.R18C	NA	LNCaP_C42b	14	68290312	68290312	Missense_Mutation	SNP	C	50	20	30	T	monoallelic	NA	NA	NA	NA	NA
TSHR	c.801G>T	p.L267F	NA	LNCaP_C42b	14	81606131	81606131	Missense_Mutation	SNP	G	40	20	20	T	monoallelic	NA	NA	NA	NA	NA
BCL11B	c.698C>A	p.A233E	NA	LNCaP_C42b	14	99642475	99642475	Missense_Mutation	SNP	G	45	34	11	T	monoallelic	NA	NA	NA	NA	NA
MGA	c.5579C>T	p.A1860V	NA	LNCaP_C42b	15	42041384	42041384	Missense_Mutation	SNP	C	38	21	17	T	biallelic_het	NA	NA	NA	NA	NA
MGA	c.5704C>A	p.L1902M	NA	LNCaP_C42b	15	42041509	42041509	Missense_Mutation	SNP	C	61	28	33	A	biallelic_het	NA	NA	NA	NA	NA
MGA	c.6202G>T	p.E2068*	NA	LNCaP_C42b	15	42042007	42042007	Nonsense_Mutation	SNP	G	30	13	17	T	biallelic_het	NA	NA	NA	NA	NA
USP8	c.226dup	p.R76Kfs*3	NA	LNCaP_C42b	15	50733660	50733661	Frameshift_Indel	INS	-	46	20	26	A	monoallelic	NA	NA	NA	NA	NA
CRTC3	c.700-1G>T	p.X234_splice	NA	LNCaP_C42b	15	91162972	91162972	Splice_Site	SNP	G	41	22	19	T	monoallelic	NA	NA	NA	NA	NA
TRAF7	c.660-1G>A	p.X220_splice	NA	LNCaP_C42b	16	2222465	2222465	Splice_Site	SNP	G	35	18	17	A	monoallelic	NA	NA	NA	NA	NA
CREBBP	c.329C>T	p.A110V	NA	LNCaP_C42b	16	3900767	3900767	Missense_Mutation	SNP	G	58	32	26	A	monoallelic	NA	NA	NA	NA	NA
PPL	c.4622A>G	p.E1541G	NA	LNCaP_C42b	16	4934034	4934034	Missense_Mutation	SNP	T	36	17	19	C	monoallelic	NA	NA	NA	NA	NA
CIITA	c.1893dup	p.K632Qfs*117	NA	LNCaP_C42b	16	11001240	11001241	Frameshift_Indel	INS	-	26	12	14	C	monoallelic	NA	NA	NA	NA	NA
CDH1	c.280C>A	p.P94T	2	LNCaP_C42b	16	68835689	68835689	Missense_Mutation	SNP	C	30	13	17	A	biallelic_het	https://cancer.sanger.ac.uk/cosmic/mutation/overview?id=22000395	COSM6005624	COSV55729356	30667
CDH1	c.2098C>T	p.P700S	2	LNCaP_C42b	16	68857463	68857463	Missense_Mutation	SNP	C	28	13	15	T	biallelic_het	https://cancer.sanger.ac.uk/cosmic/mutation/overview?id=21999414	COSM3271910	COSV55729365	30667
CHD3	c.2241_2242insA	p.G748Rfs*11	NA	LNCaP_C42b	17	7801826	7801827	Frameshift_Indel	INS	-	48	33	15	A	monoallelic	NA	NA	NA	NA	NA
PER1	c.3291C>A	p.Y1097*	NA	LNCaP_C42b	17	8045745	8045745	Nonsense_Mutation	SNP	G	38	14	24	T	monoallelic	NA	NA	NA	NA	NA
NCOR1	c.1573dup	p.T525Nfs*11	17	LNCaP_C42b	17	16029456	16029457	Frameshift_Indel	INS	-	31	23	8	T	monoallelic	https://cancer.sanger.ac.uk/cosmic/mutation/overview?id=23203052	COSM1479275	COSV51959565	55372
NF1	c.1292C>T	p.A431V	NA	LNCaP_C42b	17	29533289	29533289	Missense_Mutation	SNP	C	25	12	13	T	multi_monoallelic	NA	NA	NA	NA	NA
NF1	c.2069C>T	p.A690V	NA	LNCaP_C42b	17	29553520	29553520	Missense_Mutation	SNP	C	36	20	16	T	multi_monoallelic	NA	NA	NA	NA	NA
STAT5B	c.804dup	p.E269Rfs*12	NA	LNCaP_C42b	17	40371358	40371359	Frameshift_Indel	INS	-	21	12	9	G	monoallelic	NA	NA	NA	NA	NA
CLTC	c.488dup	p.W164Vfs*25	NA	LNCaP_C42b	17	57724992	57724993	Frameshift_Indel	INS	-	28	13	15	A	monoallelic	NA	NA	NA	NA	NA
PRKAR1A	c.47G>A	p.R16Q	5	LNCaP_C42b	17	66511587	66511587	Missense_Mutation	SNP	G	62	31	31	A	monoallelic	https://cancer.sanger.ac.uk/cosmic/mutation/overview?id=89897201	COSM2975001	COSV62235272	56063
H3F3B	c.400G>T	p.E134*	NA	LNCaP_C42b	17	73774687	73774687	Nonsense_Mutation	SNP	C	35	15	20	A	monoallelic	NA	NA	NA	NA	NA
UNC13D	c.2853G>T	p.Q951H	NA	LNCaP_C42b	17	73826210	73826210	Missense_Mutation	SNP	C	34	29	5	A	monoallelic	NA	NA	NA	NA	NA
RNF213	c.4963T>A	p.F1655I	NA	LNCaP_C42b	17	78313130	78313130	Missense_Mutation	SNP	T	28	22	6	A	biallelic_het	NA	NA	NA	NA	NA
RNF213	c.6496dup	p.R2166Kfs*65	NA	LNCaP_C42b	17	78318628	78318629	Frameshift_Indel	INS	-	38	18	20	A	biallelic_het	NA	NA	NA	NA	NA
RNF213	c.8938G>A	p.A2980T	NA	LNCaP_C42b	17	78321073	78321073	Missense_Mutation	SNP	G	23	11	12	A	biallelic_het	NA	NA	NA	NA	NA
SS18	c.299G>A	p.R100H	NA	LNCaP_C42b	18	23637639	23637639	Missense_Mutation	SNP	C	84	30	54	T	monoallelic	NA	NA	NA	NA	NA
MALT1	c.377-1G>A	p.X126_splice	NA	LNCaP_C42b	18	56363597	56363597	Splice_Site	SNP	G	20	7	13	A	monoallelic	NA	NA	NA	NA	NA
GNA11	c.439C>T	p.R147C	2	LNCaP_C42b	19	3113445	3113445	Missense_Mutation	SNP	C	38	14	24	T	monoallelic	https://cancer.sanger.ac.uk/cosmic/mutation/overview?id=21239332	COSM2750391	COSV50019275	62728
COL5A3	c.3202G>T	p.A1068S	NA	LNCaP_C42b	19	10088073	10088073	Missense_Mutation	SNP	C	58	20	38	A	monoallelic	NA	NA	NA	NA	NA
KEAP1	c.763T>C	p.Y255H	NA	LNCaP_C42b	19	10602815	10602815	Missense_Mutation	SNP	A	23	11	12	G	monoallelic	NA	NA	NA	NA	NA
SMARCA4	c.905T>C	p.L302P	2	LNCaP_C42b	19	11098387	11098387	Missense_Mutation	SNP	T	25	13	12	C	multi_monoallelic	https://cancer.sanger.ac.uk/cosmic/mutation/overview?id=53197625	COSM6359629	COSV60792690	38078
SMARCA4	c.3791del	p.T1264Rfs*27	NA	LNCaP_C42b	19	11144459	11144459	Frameshift_Indel	DEL	C	25	18	7	-	multi_monoallelic	NA	NA	NA	NA	NA
LYL1	c.794C>T	p.A265V	NA	LNCaP_C42b	19	13210182	13210182	Missense_Mutation	SNP	G	35	20	15	A	monoallelic	NA	NA	NA	NA	NA
AKT2	c.1205_1207del	p.E402del	NA	LNCaP_C42b	19	40741226	40741228	Inframe_Indel	DEL	CCT	37	27	10	-	monoallelic	NA	NA	NA	NA	NA
TRPM4	c.121del	p.R41Gfs*18	NA	LNCaP_C42b	19	49669322	49669322	Frameshift_Indel	DEL	C	31	22	9	-	multi_monoallelic	NA	NA	NA	NA	NA
TRPM4	c.3221C>T	p.A1074V	NA	LNCaP_C42b	19	49713555	49713555	Missense_Mutation	SNP	C	64	30	34	T	multi_monoallelic	NA	NA	NA	NA	NA
POLD1	c.1602G>T	p.E534D	NA	LNCaP_C42b	19	50910347	50910347	Missense_Mutation	SNP	G	49	15	34	T	monoallelic	NA	NA	NA	NA	NA
CNOT3	c.728dup	p.P244Sfs*9	8	LNCaP_C42b	19	54649666	54649667	Frameshift_Indel	INS	-	32	19	13	C	multi_monoallelic	https://cancer.sanger.ac.uk/cosmic/mutation/overview?id=47772081	COSM1481469	COSV55360405	38886
CNOT3	c.977G>C	p.G326A	NA	LNCaP_C42b	19	54651965	54651965	Missense_Mutation	SNP	G	29	13	16	C	multi_monoallelic	NA	NA	NA	NA	NA
MYCN	c.134dup	p.E47Gfs*8	NA	LNCaP_C42b	2	16082313	16082314	Frameshift_Indel	INS	-	18	5	13	C	monoallelic	NA	NA	NA	NA	NA
DNMT3A	c.320C>T	p.A107V	1	LNCaP_C42b	2	25505438	25505438	Missense_Mutation	SNP	G	42	31	11	A	monoallelic	https://cancer.sanger.ac.uk/cosmic/mutation/overview?id=23929718	COSM2911854	COSV53057010	38078
BCL11A	c.350C>A	p.S117Y	NA	LNCaP_C42b	2	60773141	60773141	Missense_Mutation	SNP	G	16	7	9	T	monoallelic	NA	NA	NA	NA	NA
AFF3	c.1429dup	p.H477Pfs*8	NA	LNCaP_C42b	2	100217913	100217914	Frameshift_Indel	INS	-	26	10	16	G	monoallelic	NA	NA	NA	NA	NA
PAX8	c.191G>A	p.R64K	2	LNCaP_C42b	2	114004331	114004331	Missense_Mutation	SNP	C	28	20	8	T	monoallelic	https://cancer.sanger.ac.uk/cosmic/mutation/overview?id=53452458	COSM6005686	COSV54507010	2813
ERCC3	c.2218G>A	p.A740T	1	LNCaP_C42b	2	128015303	128015303	Missense_Mutation	SNP	C	29	10	19	T	biallelic_het	https://cancer.sanger.ac.uk/cosmic/mutation/overview?id=20349119	COSM3042188	COSV53427508	14776
ERCC3	c.1171C>T	p.R391W	1	LNCaP_C42b	2	128044450	128044450	Missense_Mutation	SNP	G	40	25	15	A	biallelic_het	https://cancer.sanger.ac.uk/cosmic/mutation/overview?id=20348879	COSM3042203	COSV53427536	38078
LRP1B	c.12384A>G	p.I4128M	1	LNCaP_C42b	2	141081592	141081592	Missense_Mutation	SNP	T	21	15	6	C	biallelic_het	https://cancer.sanger.ac.uk/cosmic/mutation/overview?id=41582278	COSM8344842	COSV101262057	38078
LRP1B	c.12378T>A	p.D4126E	1	LNCaP_C42b	2	141081598	141081598	Missense_Mutation	SNP	A	20	14	6	T	biallelic_het	https://cancer.sanger.ac.uk/cosmic/mutation/overview?id=41443199	COSM5952721	COSV67193662	38078
LRP1B	c.8288C>T	p.A2763V	1	LNCaP_C42b	2	141267607	141267607	Missense_Mutation	SNP	G	31	7	24	A	biallelic_het	https://cancer.sanger.ac.uk/cosmic/mutation/overview?id=41590342	COSM3117331	COSV67229831	38078
LRP1B	c.8258A>G	p.D2753G	NA	LNCaP_C42b	2	141272233	141272233	Missense_Mutation	SNP	T	16	7	9	C	biallelic_het	NA	NA	NA	NA	NA
ACVR2A	c.1310del	p.K437Rfs*5	NA	LNCaP_C42b	2	148683686	148683686	Frameshift_Indel	DEL	A	27	13	14	-	monoallelic	NA	NA	NA	NA	NA
SF3B1	c.314C>T	p.A105V	NA	LNCaP_C42b	2	198285253	198285253	Missense_Mutation	SNP	G	40	18	22	A	monoallelic	NA	NA	NA	NA	NA
ERBB4	c.2964G>T	p.Q988H	NA	LNCaP_C42b	2	212286732	212286732	Missense_Mutation	SNP	C	41	28	13	A	monoallelic	NA	NA	NA	NA	NA
ATIC	c.1673A>T	p.Y558F	NA	LNCaP_C42b	2	216214272	216214272	Missense_Mutation	SNP	A	47	19	28	T	monoallelic	NA	NA	NA	NA	NA
TOP1	c.2113G>T	p.A705S	NA	LNCaP_C42b	20	39750713	39750713	Missense_Mutation	SNP	G	29	15	14	T	monoallelic	NA	NA	NA	NA	NA
PTPRT	c.2714A>G	p.D905G	NA	LNCaP_C42b	20	40770611	40770611	Missense_Mutation	SNP	T	63	36	27	C	biallelic_het	NA	NA	NA	NA	NA
PTPRT	c.2584del	p.R862Gfs*20	NA	LNCaP_C42b	20	40790090	40790090	Frameshift_Indel	DEL	G	32	14	18	-	biallelic_het	NA	NA	NA	NA	NA
NFATC2	c.2598G>T	p.Q866H	NA	LNCaP_C42b	20	50048728	50048728	Missense_Mutation	SNP	C	57	23	34	A	monoallelic	NA	NA	NA	NA	NA
SALL4	c.2983del	p.V995Ffs*14	24	LNCaP_C42b	20	50400983	50400983	Frameshift_Indel	DEL	C	47	34	13	-	monoallelic	https://cancer.sanger.ac.uk/cosmic/mutation/overview?id=23476997	COSM2763053	COSV53849561	38078	stomach/carcinoma/NS=6/559=1.07%
GNAS	c.1840C>T	p.Q614*	NA	LNCaP_C42b	20	57430160	57430160	Nonsense_Mutation	SNP	C	24	10	14	T	monoallelic	NA	NA	NA	NA	NA
SS18L1	c.146+1G>T	p.X49_splice	NA	LNCaP_C42b	20	60733805	60733805	Splice_Site	SNP	G	38	23	15	T	monoallelic	NA	NA	NA	NA	NA
OLIG2	c.751G>A	p.V251I	NA	LNCaP_C42b	21	34399921	34399921	Missense_Mutation	SNP	G	11	6	5	A	monoallelic	NA	NA	NA	NA	NA
RUNX1	c.1339C>T	p.P447S	NA	LNCaP_C42b	21	36164536	36164536	Missense_Mutation	SNP	G	6	3	3	A	monoallelic	NA	NA	NA	NA	NA
BCR	c.2596A>C	p.K866Q	NA	LNCaP_C42b	22	23630353	23630353	Missense_Mutation	SNP	A	37	17	20	C	monoallelic	NA	NA	NA	NA	NA
MN1	c.3528del	p.L1177*	NA	LNCaP_C42b	22	28193004	28193004	Frameshift_Indel	DEL	C	33	18	15	-	multi_monoallelic	NA	NA	NA	NA	NA
MN1	c.2255G>A	p.G752D	NA	LNCaP_C42b	22	28194277	28194277	Missense_Mutation	SNP	C	30	13	17	T	multi_monoallelic	NA	NA	NA	NA	NA
CHEK2	c.1289C>A	p.T430N	NA	LNCaP_C42b	22	29091797	29091797	Missense_Mutation	SNP	G	28	12	16	T	monoallelic	NA	NA	NA	NA	NA
PATZ1	c.1732G>T	p.E578*	NA	LNCaP_C42b	22	31723209	31723209	Nonsense_Mutation	SNP	C	40	32	8	A	Noinfo	NA	NA	NA	NA	NA
PATZ1	c.1595T>A	p.I532N	NA	LNCaP_C42b	22	31724823	31724823	Missense_Mutation	SNP	A	38	18	20	T	Noinfo	NA	NA	NA	NA	NA
MYH9	c.80C>T	p.A27V	NA	LNCaP_C42b	22	36745202	36745202	Missense_Mutation	SNP	G	60	15	45	A	monoallelic	NA	NA	NA	NA	NA
EP300	c.5332G>T	p.G1778W	NA	LNCaP_C42b	22	41573047	41573047	Missense_Mutation	SNP	G	28	18	10	T	monoallelic	NA	NA	NA	NA	NA
FANCD2	c.1275C>A	p.Y425*	NA	LNCaP_C42b	3	10088404	10088404	Nonsense_Mutation	SNP	C	27	19	8	A	monoallelic	NA	NA	NA	NA	NA
XPC	c.2544G>T	p.W848C	1	LNCaP_C42b	3	14188850	14188850	Missense_Mutation	SNP	C	29	20	9	A	monoallelic	https://cancer.sanger.ac.uk/cosmic/mutation/overview?id=20148218	COSM1039292	COSV53203562	38078
SETD2	c.4953del	p.F1651Lfs*12	NA	LNCaP_C42b	3	47143010	47143010	Frameshift_Indel	DEL	A	20	5	15	-	multi_monoallelic	NA	NA	NA	NA	NA
SETD2	c.419G>A	p.G140D	NA	LNCaP_C42b	3	47165707	47165707	Missense_Mutation	SNP	C	32	18	14	T	multi_monoallelic	NA	NA	NA	NA	NA
DHX30	c.530del	p.G177Dfs*9	NA	LNCaP_C42b	3	47882526	47882526	Frameshift_Indel	DEL	G	22	16	6	-	monoallelic	NA	NA	NA	NA	NA
BAP1	c.199G>T	p.D67Y	NA	LNCaP_C42b	3	52442546	52442546	Missense_Mutation	SNP	C	17	9	8	A	monoallelic	NA	NA	NA	NA	NA
CACNA1D	c.2893C>A	p.L965I	NA	LNCaP_C42b	3	53777059	53777059	Missense_Mutation	SNP	C	31	18	13	A	biallelic_het	NA	NA	NA	NA	NA
CACNA1D	c.5689G>C	p.D1897H	NA	LNCaP_C42b	3	53839053	53839053	Missense_Mutation	SNP	G	26	10	16	C	biallelic_het	NA	NA	NA	NA	NA
CBLB	c.557T>C	p.F186S	NA	LNCaP_C42b	3	105495249	105495249	Missense_Mutation	SNP	A	37	20	17	G	monoallelic	NA	NA	NA	NA	NA
ATR	c.4445A>G	p.K1482R	NA	LNCaP_C42b	3	142234295	142234295	Missense_Mutation	SNP	T	44	20	24	C	monoallelic	NA	NA	NA	NA	NA
MECOM	c.2034dup	p.G679Rfs*37	1	LNCaP_C42b	3	168833256	168833257	Frameshift_Indel	INS	-	55	46	9	T	monoallelic	https://cancer.sanger.ac.uk/cosmic/mutation/overview?id=23863538	COSM6710536	COSV52962768	38078
TBL1XR1	c.1108G>A	p.D370N	3	LNCaP_C42b	3	176755900	176755900	Missense_Mutation	SNP	C	51	11	40	T	biallelic_het	https://cancer.sanger.ac.uk/cosmic/mutation/overview?id=54821924	COSM1420704	COSV70501537	38078
TBL1XR1	c.377dup	p.N126Kfs*19	1	LNCaP_C42b	3	176769341	176769342	Frameshift_Indel	INS	-	36	21	15	T	biallelic_het	https://cancer.sanger.ac.uk/cosmic/mutation/overview?id=54822441	COSM3205542	COSV61790790	38078
MAP3K13	c.24T>A	p.C8*	NA	LNCaP_C42b	3	185047018	185047018	Nonsense_Mutation	SNP	T	49	18	31	A	monoallelic	NA	NA	NA	NA	NA
PTPN13	c.6334T>A	p.S2112T	NA	LNCaP_C42b	4	87707063	87707063	Missense_Mutation	SNP	T	39	23	16	A	monoallelic	NA	NA	NA	NA	NA
SMARCAD1	c.1040del	p.N347Mfs*24	NA	LNCaP_C42b	4	95173910	95173910	Frameshift_Indel	DEL	A	21	11	10	-	monoallelic	NA	NA	NA	NA	NA
FAT4	c.127G>A	p.A43T	NA	LNCaP_C42b	4	126237693	126237693	Missense_Mutation	SNP	G	38	11	27	A	monoallelic	NA	NA	NA	NA	NA
TERT	c.2593C>T	p.R865C	NA	LNCaP_C42b	5	1266640	1266640	Missense_Mutation	SNP	G	43	25	18	A	monoallelic	NA	NA	NA	NA	NA
PIK3R1	c.1915C>T	p.R639*	9	LNCaP_C42b	5	67592099	67592099	Nonsense_Mutation	SNP	C	50	28	22	T	monoallelic	https://cancer.sanger.ac.uk/cosmic/mutation/overview?id=74010580	COSM3071985	COSV57126125	68086
CHD1	c.929dup	p.N310Kfs*12	NA	LNCaP_C42b	5	98235339	98235340	Frameshift_Indel	INS	-	41	22	19	T	monoallelic	NA	NA	NA	NA	NA
APC	c.8140C>T	p.R2714C	NA	LNCaP_C42b	5	112179431	112179431	Missense_Mutation	SNP	C	25	12	13	T	monoallelic	NA	NA	NA	NA	NA
ITK	c.1155G>T	p.K385N	3	LNCaP_C42b	5	156670727	156670727	Missense_Mutation	SNP	G	61	34	27	T	monoallelic	https://cancer.sanger.ac.uk/cosmic/mutation/overview?id=51356214	COSM3246297	COSV70060822	1627
EBF1	c.1450G>A	p.V484I	4	LNCaP_C42b	5	158139261	158139261	Missense_Mutation	SNP	C	89	44	45	T	monoallelic	https://cancer.sanger.ac.uk/cosmic/mutation/overview?id=27248454	COSM3247046	COSV58168843	38078
FLT4	c.3272A>G	p.Y1091C	NA	LNCaP_C42b	5	180041127	180041127	Missense_Mutation	SNP	T	73	44	29	C	monoallelic	NA	NA	NA	NA	NA
IRF4	c.918G>T	p.K306N	NA	LNCaP_C42b	6	401596	401596	Missense_Mutation	SNP	G	57	27	30	T	monoallelic	NA	NA	NA	NA	NA
HMGA1	c.209C>A	p.A70D	NA	LNCaP_C42b	6	34210562	34210562	Missense_Mutation	SNP	C	35	16	19	A	monoallelic	NA	NA	NA	NA	NA
ROS1	c.5435G>A	p.S1812N	NA	LNCaP_C42b	6	117647509	117647509	Missense_Mutation	SNP	C	39	25	14	T	multi_monoallelic	NA	NA	NA	NA	NA
ROS1	c.3796G>A	p.V1266M	NA	LNCaP_C42b	6	117679025	117679025	Missense_Mutation	SNP	C	32	25	7	T	multi_monoallelic	NA	NA	NA	NA	NA
PTPRK	c.2780G>T	p.R927I	NA	LNCaP_C42b	6	128316671	128316671	Missense_Mutation	SNP	C	23	18	5	A	monoallelic	NA	NA	NA	NA	NA
LATS1	c.563A>G	p.Q188R	NA	LNCaP_C42b	6	150005662	150005662	Missense_Mutation	SNP	T	28	13	15	C	monoallelic	NA	NA	NA	NA	NA
ARID1B	c.5332C>T	p.P1778S	NA	LNCaP_C42b	6	157527607	157527607	Missense_Mutation	SNP	C	41	24	17	T	multi_monoallelic	NA	NA	NA	NA	NA
ARID1B	c.6490G>T	p.E2164*	NA	LNCaP_C42b	6	157528765	157528765	Nonsense_Mutation	SNP	G	29	21	8	T	multi_monoallelic	NA	NA	NA	NA	NA
IGF2R	c.4238C>A	p.P1413Q	NA	LNCaP_C42b	6	160489403	160489403	Missense_Mutation	SNP	C	54	12	42	A	monoallelic	NA	NA	NA	NA	NA
ETV1	c.620G>A	p.G207E	NA	LNCaP_C42b	7	13971309	13971309	Missense_Mutation	SNP	C	46	23	23	T	monoallelic	NA	NA	NA	NA	NA
HOXA11	c.895del	p.I299Lfs*30	NA	LNCaP_C42b	7	27222462	27222462	Frameshift_Indel	DEL	T	37	28	9	-	Noinfo	NA	NA	NA	NA	NA
HOXA11	c.226del	p.R76Afs*219	NA	LNCaP_C42b	7	27224538	27224538	Frameshift_Indel	DEL	G	40	20	20	-	Noinfo	NA	NA	NA	NA	NA
SBDS	c.136G>T	p.D46Y	NA	LNCaP_C42b	7	66459321	66459321	Missense_Mutation	SNP	C	55	27	28	A	monoallelic	NA	NA	NA	NA	NA
HIP1	c.2732C>T	p.A911V	NA	LNCaP_C42b	7	75174027	75174027	Missense_Mutation	SNP	G	80	46	34	A	biallelic_het	NA	NA	NA	NA	NA
HIP1	c.628C>T	p.R210C	NA	LNCaP_C42b	7	75203183	75203183	Missense_Mutation	SNP	G	48	21	27	A	biallelic_het	NA	NA	NA	NA	NA
TRRAP	c.4046C>T	p.A1349V	NA	LNCaP_C42b	7	98533233	98533233	Missense_Mutation	SNP	C	52	39	13	T	Noinfo	NA	NA	NA	NA	NA
TRRAP	c.7993C>T	p.R2665W	2	LNCaP_C42b	7	98574160	98574160	Missense_Mutation	SNP	C	63	38	25	T	Noinfo	https://cancer.sanger.ac.uk/cosmic/mutation/overview?id=32062076	COSM1093666	COSV62839851	38078
TRRAP	c.10661C>T	p.P3554L	NA	LNCaP_C42b	7	98602921	98602921	Missense_Mutation	SNP	C	53	26	27	T	Noinfo	NA	NA	NA	NA	NA
CUX1	c.4101G>T	p.K1367N	NA	LNCaP_C42b	7	101891872	101891872	Missense_Mutation	SNP	G	21	13	8	T	monoallelic	NA	NA	NA	NA	NA
SMO	c.817T>C	p.C273R	NA	LNCaP_C42b	7	128845520	128845520	Missense_Mutation	SNP	T	47	22	25	C	monoallelic	NA	NA	NA	NA	NA
TRIM24	c.982C>A	p.L328M	NA	LNCaP_C42b	7	138213961	138213961	Missense_Mutation	SNP	C	45	19	26	A	monoallelic	NA	NA	NA	NA	NA
KMT2C	c.13488del	p.F4496Lfs*21	15	LNCaP_C42b	7	151845524	151845524	Frameshift_Indel	DEL	A	37	8	29	-	biallelic_het	https://cancer.sanger.ac.uk/cosmic/mutation/overview?id=22733289	COSM1181043	COSV51394086	63101
KMT2C	c.12425T>C	p.L4142S	NA	LNCaP_C42b	7	151849891	151849891	Missense_Mutation	SNP	A	59	28	31	G	biallelic_het	NA	NA	NA	NA	NA
KMT2C	c.5369C>T	p.S1790F	NA	LNCaP_C42b	7	151879576	151879576	Missense_Mutation	SNP	G	40	24	16	A	biallelic_het	NA	NA	NA	NA	NA
NRG1	c.1834C>A	p.L612M	NA	LNCaP_C42b	8	32621816	32621816	Missense_Mutation	SNP	C	46	23	23	A	monoallelic	NA	NA	NA	NA	NA
FGFR1	c.332G>A	p.R111H	NA	LNCaP_C42b	8	38287325	38287325	Missense_Mutation	SNP	C	93	48	45	T	monoallelic	NA	NA	NA	NA	NA
KAT6A	c.5804G>T	p.S1935I	NA	LNCaP_C42b	8	41789934	41789934	Missense_Mutation	SNP	C	54	31	23	A	biallelic_het	NA	NA	NA	NA	NA
KAT6A	c.2135G>A	p.S712N	NA	LNCaP_C42b	8	41801359	41801359	Missense_Mutation	SNP	C	39	20	19	T	biallelic_het	NA	NA	NA	NA	NA
HOOK3	c.1444G>A	p.E482K	NA	LNCaP_C42b	8	42841850	42841850	Missense_Mutation	SNP	G	44	24	20	A	monoallelic	NA	NA	NA	NA	NA
CHCHD7	c.299A>G	p.E100G	NA	LNCaP_C42b	8	57129960	57129960	Missense_Mutation	SNP	A	48	23	25	G	monoallelic	NA	NA	NA	NA	NA
EXT1	c.1935G>T	p.M645I	NA	LNCaP_C42b	8	118817081	118817081	Missense_Mutation	SNP	C	52	34	18	A	monoallelic	NA	NA	NA	NA	NA
MYC	c.134A>G	p.N45S	2	LNCaP_C42b	8	128750597	128750597	Missense_Mutation	SNP	A	45	23	22	G	monoallelic	https://cancer.sanger.ac.uk/cosmic/mutation/overview?id=38683930	COSM3316855	COSV52382592	38078
RECQL4	c.2296del	p.X766_splice	NA	LNCaP_C42b	8	145738768	145738768	Splice_Site	DEL	G	41	0	41	-	biallelic_hom	NA	NA	NA	NA	NA
SYK	c.98del	p.G33Afs*2	NA	LNCaP_C42b	9	93606273	93606273	Frameshift_Indel	DEL	G	57	25	32	-	monoallelic	NA	NA	NA	NA	NA
COL15A1	c.3727G>A	p.A1243T	NA	LNCaP_C42b	9	101829239	101829239	Missense_Mutation	SNP	G	35	26	9	A	monoallelic	NA	NA	NA	NA	NA
NR4A3	c.995A>G	p.Q332R	3	LNCaP_C42b	9	102594981	102594981	Missense_Mutation	SNP	A	29	13	16	G	monoallelic	https://cancer.sanger.ac.uk/cosmic/mutation/overview?id=28681367	COSM3166798	COSV58243849	388
CNTRL	c.5164_5165insT	p.R1722Mfs*4	NA	LNCaP_C42b	9	123924208	123924209	Frameshift_Indel	INS	-	36	20	16	T	monoallelic	NA	NA	NA	NA	NA
ABL1	c.2366A>G	p.N789S	NA	LNCaP_C42b	9	133759986	133759986	Missense_Mutation	SNP	A	45	27	18	G	monoallelic	NA	NA	NA	NA	NA
NUP214	c.6060C>A	p.S2020R	NA	LNCaP_C42b	9	134103704	134103704	Missense_Mutation	SNP	C	54	24	30	A	monoallelic	NA	NA	NA	NA	NA
TSC1	c.439G>T	p.G147W	NA	LNCaP_C42b	9	135798804	135798804	Missense_Mutation	SNP	C	50	26	24	A	monoallelic	NA	NA	NA	NA	NA
COL5A1	c.2828G>A	p.G943D	NA	LNCaP_C42b	9	137688248	137688248	Missense_Mutation	SNP	G	27	18	9	A	multi_monoallelic	NA	NA	NA	NA	NA
COL5A1	c.4706C>A	p.P1569Q	NA	LNCaP_C42b	9	137716453	137716453	Missense_Mutation	SNP	C	50	27	23	A	multi_monoallelic	NA	NA	NA	NA	NA
NOTCH1	c.2594C>A	p.T865N	NA	LNCaP_C42b	9	139405251	139405251	Missense_Mutation	SNP	G	39	21	18	T	monoallelic	NA	NA	NA	NA	NA
AMER1	c.519dup	p.S174*	6	LNCaP_C42b	X	63412647	63412648	Frameshift_Indel	INS	-	27	1	26	A	biallelic_hom	https://cancer.sanger.ac.uk/cosmic/mutation/overview?id=28192748	COSM1468879	COSV57662519	38078
AR	c.228_239dup	p.Q77_Q80dup	NA	LNCaP_C42b	X	66765158	66765159	Inframe_Indel	INS	-	4	0	4	GCAGCAGCAGCA	biallelic_hom	NA	NA	NA	NA	NA
AR	c.2632A>G	p.T878A	70	LNCaP_C42b	X	66943552	66943552	Missense_Mutation	SNP	A	23	0	23	G	biallelic_hom	https://cancer.sanger.ac.uk/cosmic/mutation/overview?id=38851267	COSM236693	COSV65953150	58047	prostate/carcinoma/NS=37/1953=1.89%
ZMYM3	c.2391G>T	p.E797D	NA	LNCaP_C42b	X	70466466	70466466	Missense_Mutation	SNP	C	28	15	13	A	biallelic_hom	NA	NA	NA	NA	NA
ZMYM3	c.1776C>A	p.H592Q	NA	LNCaP_C42b	X	70468336	70468336	Missense_Mutation	SNP	G	30	20	10	T	biallelic_hom	NA	NA	NA	NA	NA
ZMYM3	c.143del	p.P48Lfs*65	NA	LNCaP_C42b	X	70472963	70472963	Frameshift_Indel	DEL	G	28	1	27	-	biallelic_hom	NA	NA	NA	NA	NA
ATRX	c.6792_6794del	p.E2265del	NA	LNCaP_C42b	X	76778785	76778787	Inframe_Indel	DEL	TCT	29	0	29	-	biallelic_hom	NA	NA	NA	NA	NA
STAG2	c.1039T>C	p.C347R	NA	LNCaP_C42b	X	123184992	123184992	Missense_Mutation	SNP	T	11	3	8	C	biallelic_hom	NA	NA	NA	NA	NA
STAG2	c.1108C>T	p.R370W	5	LNCaP_C42b	X	123185061	123185061	Missense_Mutation	SNP	C	14	0	14	T	biallelic_hom	https://cancer.sanger.ac.uk/cosmic/mutation/overview?id=23800420	COSM238562	COSV54351727	63778
SMARCA1	c.2423G>A	p.R808Q	NA	LNCaP_C42b	X	128614697	128614697	Missense_Mutation	SNP	C	24	18	6	T	monoallelic	NA	NA	NA	NA	NA
ELF4	c.1849C>T	p.L617F	NA	LNCaP_C42b	X	129200839	129200839	Missense_Mutation	SNP	G	23	0	23	A	biallelic_hom	NA	NA	NA	NA	NA
GPC3	c.403C>A	p.P135T	NA	LNCaP_C42b	X	132888138	132888138	Missense_Mutation	SNP	G	32	0	32	T	biallelic_hom	NA	NA	NA	NA	NA
RPL22	c.44del	p.K15Rfs*5	133	CWR22Rv1	1	6257785	6257785	Frameshift_Indel	DEL	T	26	13	13	-	monoallelic	https://cancer.sanger.ac.uk/cosmic/mutation/overview?id=23549956	COSM179404	COSV52376836	38078	large_intestine/carcinoma/adenocarcinoma=68/2391=2.84%;stomach/carcinoma/intestinal_adenocarcinoma=12/97=12.37%;stomach/carcinoma/NS=22/559=3.94%;biliary_tract/carcinoma/NS=6/266=2.26%
MTOR	c.5246G>A	p.R1749Q	NA	CWR22Rv1	1	11194408	11194408	Missense_Mutation	SNP	C	26	14	12	T	monoallelic	NA	NA	NA	NA	NA
SPEN	c.6750del	p.A2251Qfs*102	NA	CWR22Rv1	1	16259480	16259480	Frameshift_Indel	DEL	C	18	8	10	-	multi_monoallelic	NA	NA	NA	NA	NA
SPEN	c.9245A>G	p.H3082R	NA	CWR22Rv1	1	16261980	16261980	Missense_Mutation	SNP	A	17	11	6	G	multi_monoallelic	NA	NA	NA	NA	NA
ARID1A	c.3977del	p.P1326Rfs*155	NA	CWR22Rv1	1	27100176	27100176	Frameshift_Indel	DEL	C	32	18	14	-	biallelic_het	NA	NA	NA	NA	NA
ARID1A	c.5548dup	p.D1850Gfs*4	NA	CWR22Rv1	1	27105930	27105931	Frameshift_Indel	INS	-	4	0	4	G	biallelic_het	NA	NA	NA	NA	NA
SFPQ	c.1741C>T	p.R581C	NA	CWR22Rv1	1	35653648	35653648	Missense_Mutation	SNP	G	12	7	5	A	monoallelic	NA	NA	NA	NA	NA
CSF3R	c.1726G>A	p.A576T	NA	CWR22Rv1	1	36933561	36933561	Missense_Mutation	SNP	C	29	24	5	T	monoallelic	NA	NA	NA	NA	NA
TAL1	c.611dup	p.N204Kfs*24	NA	CWR22Rv1	1	47685776	47685777	Frameshift_Indel	INS	-	42	26	16	T	monoallelic	NA	NA	NA	NA	NA
JAK1	c.1289dup	p.L431Vfs*22	18	CWR22Rv1	1	65325832	65325833	Frameshift_Indel	INS	-	24	14	10	G	biallelic_het	https://cancer.sanger.ac.uk/cosmic/mutation/overview?id=29880993	COSM41842	COSV61087635	65273
JAK1	c.425del	p.K142Rfs*26	12	CWR22Rv1	1	65339111	65339111	Frameshift_Indel	DEL	T	15	11	4	-	biallelic_het	https://cancer.sanger.ac.uk/cosmic/mutation/overview?id=29882237	COSM1639943	COSV61087645	65273
NOTCH2	c.3246dup	p.A1083Sfs*17	NA	CWR22Rv1	1	120480570	120480571	Frameshift_Indel	INS	-	23	9	14	T	biallelic_het	NA	NA	NA	NA	NA
NOTCH2	c.2127dup	p.E710Rfs*33	NA	CWR22Rv1	1	120497754	120497755	Frameshift_Indel	INS	-	51	31	20	G	biallelic_het	NA	NA	NA	NA	NA
NOTCH2	c.316T>C	p.S106P	NA	CWR22Rv1	1	120548051	120548051	Missense_Mutation	SNP	A	46	31	15	G	biallelic_het	NA	NA	NA	NA	NA
MLLT11	c.54del	p.I19Sfs*30	NA	CWR22Rv1	1	151039752	151039752	Frameshift_Indel	DEL	C	29	22	7	-	monoallelic	NA	NA	NA	NA	NA
ETV3	c.1097C>T	p.A366V	NA	CWR22Rv1	1	157095075	157095075	Missense_Mutation	SNP	G	42	35	7	A	monoallelic	NA	NA	NA	NA	NA
MDM4	c.1050del	p.E351Kfs*28	NA	CWR22Rv1	1	204518387	204518387	Frameshift_Indel	DEL	T	57	45	12	-	monoallelic	NA	NA	NA	NA	NA
MLLT10	c.3167_3168del	p.L1056Qfs*2	NA	CWR22Rv1	10	22030872	22030873	Frameshift_Indel	DEL	TT	30	8	22	-	monoallelic	NA	NA	NA	NA	NA
TET1	c.1768C>T	p.R590*	NA	CWR22Rv1	10	70333863	70333863	Nonsense_Mutation	SNP	C	32	13	19	T	multi_monoallelic	NA	NA	NA	NA	NA
TET1	c.2072C>T	p.T691I	NA	CWR22Rv1	10	70404558	70404558	Missense_Mutation	SNP	C	31	15	16	T	multi_monoallelic	NA	NA	NA	NA	NA
NUTM2B	c.1993C>G	p.Q665E	1	CWR22Rv1	10	81471597	81471597	Missense_Mutation	SNP	C	33	27	6	G	monoallelic	https://cancer.sanger.ac.uk/cosmic/mutation/overview?id=54113239	COSM3675886	COSV61136509	38078
NUTM2D	c.325T>C	p.F109L	2	CWR22Rv1	10	89120396	89120396	Missense_Mutation	SNP	T	21	0	21	C	biallelic_hom	https://cancer.sanger.ac.uk/cosmic/mutation/overview?id=48496950	COSM4591792	COSV67745869	38078
TCF7L2	c.1390A>G	p.R464G	1	CWR22Rv1	10	114920449	114920449	Missense_Mutation	SNP	A	31	11	20	G	multi_monoallelic	https://cancer.sanger.ac.uk/cosmic/mutation/overview?id=81759682	COSM2053338	COSV53339984	13489
TCF7L2	c.1403dup	p.C469Vfs*8	21	CWR22Rv1	10	114925316	114925317	Frameshift_Indel	INS	-	24	7	17	A	multi_monoallelic	https://cancer.sanger.ac.uk/cosmic/mutation/overview?id=81747908	COSM1345855	COSV53336265	51567
NUP98	c.3874T>C	p.W1292R	NA	CWR22Rv1	11	3720447	3720447	Missense_Mutation	SNP	A	19	12	7	G	monoallelic	NA	NA	NA	NA	NA
MEN1	c.1561del	p.R521Gfs*43	NA	CWR22Rv1	11	64572093	64572093	Frameshift_Indel	DEL	G	24	12	12	-	biallelic_het	NA	NA	NA	NA	NA
MEN1	c.773C>T	p.S258L	NA	CWR22Rv1	11	64575049	64575049	Missense_Mutation	SNP	G	16	7	9	A	biallelic_het	NA	NA	NA	NA	NA
MEN1	c.694T>C	p.Y232H	NA	CWR22Rv1	11	64575128	64575128	Missense_Mutation	SNP	A	15	10	5	G	biallelic_het	NA	NA	NA	NA	NA
NUMA1	c.3097C>T	p.R1033W	NA	CWR22Rv1	11	71725452	71725452	Missense_Mutation	SNP	G	28	15	13	A	multi_monoallelic	NA	NA	NA	NA	NA
NUMA1	c.85C>T	p.Q29*	NA	CWR22Rv1	11	71740294	71740294	Nonsense_Mutation	SNP	G	16	9	7	A	multi_monoallelic	NA	NA	NA	NA	NA
MAML2	c.2602G>T	p.G868W	NA	CWR22Rv1	11	95712981	95712981	Missense_Mutation	SNP	C	50	31	19	A	monoallelic	NA	NA	NA	NA	NA
ATM	c.3301A>G	p.K1101E	NA	CWR22Rv1	11	108150234	108150234	Missense_Mutation	SNP	A	16	5	11	G	monoallelic	NA	NA	NA	NA	NA
BCL9L	c.4388C>T	p.P1463L	NA	CWR22Rv1	11	118769236	118769236	Missense_Mutation	SNP	G	36	21	15	A	multi_monoallelic	NA	NA	NA	NA	NA
BCL9L	c.3973G>A	p.D1325N	NA	CWR22Rv1	11	118769651	118769651	Missense_Mutation	SNP	C	27	13	14	T	multi_monoallelic	NA	NA	NA	NA	NA
ARHGEF12	c.4146del	p.F1382Lfs*35	NA	CWR22Rv1	11	120351043	120351043	Frameshift_Indel	DEL	T	19	8	11	-	monoallelic	NA	NA	NA	NA	NA
FLI1	c.970C>T	p.R324W	2	CWR22Rv1	11	128680494	128680494	Missense_Mutation	SNP	C	25	11	14	T	monoallelic	https://cancer.sanger.ac.uk/cosmic/mutation/overview?id=78298303	COSM1977497	COSV55648982	38078
ADAMTS8	c.25dup	p.R9Pfs*191	NA	CWR22Rv1	11	130298156	130298157	Frameshift_Indel	INS	-	12	7	5	G	monoallelic	NA	NA	NA	NA	NA
KDM5A	c.1778C>T	p.P593L	NA	CWR22Rv1	12	438191	438191	Missense_Mutation	SNP	G	48	39	9	A	monoallelic	NA	NA	NA	NA	NA
ERC1	c.1187G>A	p.R396H	NA	CWR22Rv1	12	1219383	1219383	Missense_Mutation	SNP	G	41	20	21	A	monoallelic	NA	NA	NA	NA	NA
CHD4	c.4388del	p.F1463Sfs*39	NA	CWR22Rv1	12	6691430	6691430	Frameshift_Indel	DEL	A	40	15	25	-	monoallelic	NA	NA	NA	NA	NA
ZNF384	c.1483_1488dup	p.Q495_A496dup	NA	CWR22Rv1	12	6777125	6777126	Inframe_Indel	INS	-	25	16	9	GGCCTG	multi_monoallelic	NA	NA	NA	NA	NA
ZNF384	c.1428_1433del	p.Q495_A496del	NA	CWR22Rv1	12	6777181	6777186	Inframe_Indel	DEL	GCCTGG	33	25	8	-	multi_monoallelic	NA	NA	NA	NA	NA
KMT2D	c.5541G>T	p.E1847D	NA	CWR22Rv1	12	49436962	49436962	Missense_Mutation	SNP	C	29	4	25	A	monoallelic	NA	NA	NA	NA	NA
ERBB3	c.2048G>A	p.R683Q	NA	CWR22Rv1	12	56489583	56489583	Missense_Mutation	SNP	G	22	15	7	A	biallelic_het	NA	NA	NA	NA	NA
ERBB3	c.2413dup	p.A805Gfs*22	NA	CWR22Rv1	12	56490961	56490962	Frameshift_Indel	INS	-	20	15	5	G	biallelic_het	NA	NA	NA	NA	NA
CLIP1	c.4127G>A	p.R1376H	1	CWR22Rv1	12	122757612	122757612	Missense_Mutation	SNP	C	28	8	20	T	monoallelic	https://cancer.sanger.ac.uk/cosmic/mutation/overview?id=79286504	COSM202598	COSV56810847	38078
NCOR2	c.5509_5517dup	p.S1837_G1839dup	27	CWR22Rv1	12	124824721	124824722	Inframe_Indel	INS	-	52	0	52	GCCGCTGCT	biallelic_hom	https://cancer.sanger.ac.uk/cosmic/mutation/overview?id=45371441	COSM1359887	COSV62292510	41645
NCOR2	c.4712A>G	p.E1571G	NA	CWR22Rv1	12	124829145	124829145	Missense_Mutation	SNP	T	27	22	5	C	biallelic_hom	NA	NA	NA	NA	NA
ZMYM2	c.2271del	p.K757Nfs*31	NA	CWR22Rv1	13	20611023	20611023	Frameshift_Indel	DEL	A	19	12	7	-	monoallelic	NA	NA	NA	NA	NA
BRCA2	c.5428G>A	p.V1810I	1	CWR22Rv1	13	32913920	32913920	Missense_Mutation	SNP	G	21	13	8	A	biallelic_het	https://cancer.sanger.ac.uk/cosmic/mutation/overview?id=81534666	COSM2071435	COSV66450502	38078
BRCA2	c.9097dup	p.T3033Nfs*11	16	CWR22Rv1	13	32954022	32954023	Frameshift_Indel	INS	-	15	6	9	A	biallelic_het	https://cancer.sanger.ac.uk/cosmic/mutation/overview?id=81522199	COSM2071555	COSV66447774	63826
RNF31	c.665C>A	p.S222Y	NA	CWR22Rv1	14	24618648	24618648	Missense_Mutation	SNP	C	24	15	9	A	monoallelic	NA	NA	NA	NA	NA
KTN1	c.426del	p.V143*	NA	CWR22Rv1	14	56079187	56079187	Frameshift_Indel	DEL	A	19	9	10	-	monoallelic	NA	NA	NA	NA	NA
TRIP11	c.2407C>T	p.Q803*	NA	CWR22Rv1	14	92471913	92471913	Nonsense_Mutation	SNP	G	29	20	9	A	monoallelic	NA	NA	NA	NA	NA
BCL11B	c.1448C>T	p.S483L	NA	CWR22Rv1	14	99641725	99641725	Missense_Mutation	SNP	G	37	19	18	A	monoallelic	NA	NA	NA	NA	NA
MGA	c.8147C>T	p.T2716M	NA	CWR22Rv1	15	42058427	42058427	Missense_Mutation	SNP	C	12	6	6	T	monoallelic	NA	NA	NA	NA	NA
USP8	c.2599C>T	p.Q867*	NA	CWR22Rv1	15	50786418	50786418	Nonsense_Mutation	SNP	C	26	8	18	T	monoallelic	NA	NA	NA	NA	NA
AXIN1	c.37G>A	p.G13R	NA	CWR22Rv1	16	396989	396989	Missense_Mutation	SNP	C	33	18	15	T	monoallelic	NA	NA	NA	NA	NA
CREBBP	c.575A>G	p.N192S	NA	CWR22Rv1	16	3900521	3900521	Missense_Mutation	SNP	T	24	7	17	C	monoallelic	NA	NA	NA	NA	NA
PPL	c.4418G>A	p.R1473Q	NA	CWR22Rv1	16	4934238	4934238	Missense_Mutation	SNP	C	18	12	6	T	monoallelic	NA	NA	NA	NA	NA
USP7	c.590C>T	p.A197V	NA	CWR22Rv1	16	9014237	9014237	Missense_Mutation	SNP	G	2	0	2	A	monoallelic	NA	NA	NA	NA	NA
PALB2	c.3367G>A	p.V1123M	2	CWR22Rv1	16	23614974	23614974	Missense_Mutation	SNP	C	20	14	6	T	monoallelic	https://cancer.sanger.ac.uk/cosmic/mutation/overview?id=21620405	COSM3279823	COSV55163398	38078
IL21R	c.20_21insG	p.L10Afs*47	NA	CWR22Rv1	16	27441412	27441413	Frameshift_Indel	INS	-	27	16	11	G	monoallelic	NA	NA	NA	NA	NA
CBFB	c.207dup	p.P70Sfs*13	NA	CWR22Rv1	16	67070577	67070578	Frameshift_Indel	INS	-	15	10	5	T	monoallelic	NA	NA	NA	NA	NA
ZFHX3	c.5774del	p.G1925Vfs*72	5	CWR22Rv1	16	72830807	72830807	Frameshift_Indel	DEL	C	14	10	4	-	monoallelic	https://cancer.sanger.ac.uk/cosmic/mutation/overview?id=23034953	COSM3276851	COSV51710890	51932
YWHAE	c.395T>G	p.L132R	NA	CWR22Rv1	17	1264569	1264569	Missense_Mutation	SNP	A	17	10	7	C	monoallelic	NA	NA	NA	NA	NA
RABEP1	c.1594C>T	p.R532C	NA	CWR22Rv1	17	5266237	5266237	Missense_Mutation	SNP	C	25	15	10	T	monoallelic	NA	NA	NA	NA	NA
TP53	c.992A>G	p.Q331R	2	CWR22Rv1	17	7576854	7576854	Missense_Mutation	SNP	T	17	5	12	C	biallelic_het	https://cancer.sanger.ac.uk/cosmic/mutation/overview?id=23751738	COSM12218	COSV52746555	38078
TP53	c.216del	p.V73Wfs*50	36	CWR22Rv1	17	7579471	7579471	Frameshift_Indel	DEL	G	20	12	8	-	biallelic_het	https://cancer.sanger.ac.uk/cosmic/mutation/overview?id=23643349	COSM18569	COSV52692730	167988
CHD3	c.1795del	p.R599Vfs*16	23	CWR22Rv1	17	7798765	7798765	Frameshift_Indel	DEL	C	32	25	7	-	monoallelic	https://cancer.sanger.ac.uk/cosmic/mutation/overview?id=41878473	COSM1387351	COSV57872218	38078
PER1	c.2576C>A	p.P859H	NA	CWR22Rv1	17	8047080	8047080	Missense_Mutation	SNP	G	16	10	6	T	monoallelic	NA	NA	NA	NA	NA
RNF213	c.14909G>A	p.R4970Q	NA	CWR22Rv1	17	78360678	78360678	Missense_Mutation	SNP	G	37	20	17	A	monoallelic	NA	NA	NA	NA	NA
MBD1	c.1859G>A	p.S620N	NA	CWR22Rv1	18	47796108	47796108	Missense_Mutation	SNP	C	39	26	13	T	monoallelic	NA	NA	NA	NA	NA
STK11	c.1221G>T	p.E407D	NA	CWR22Rv1	19	1226565	1226565	Missense_Mutation	SNP	G	28	15	13	T	monoallelic	NA	NA	NA	NA	NA
KEAP1	c.941C>T	p.T314M	NA	CWR22Rv1	19	10602637	10602637	Missense_Mutation	SNP	G	12	5	7	A	monoallelic	NA	NA	NA	NA	NA
CALR	c.524T>G	p.I175S	NA	CWR22Rv1	19	13051088	13051088	Missense_Mutation	SNP	T	28	15	13	G	monoallelic	NA	NA	NA	NA	NA
CIC	c.784G>T	p.G262C	NA	CWR22Rv1	19	42776719	42776719	Missense_Mutation	SNP	G	30	20	10	T	monoallelic	NA	NA	NA	NA	NA
BAX	c.120_121del	p.E41Gfs*32	1	CWR22Rv1	19	49458971	49458972	Frameshift_Indel	DEL	GG	11	7	4	-	monoallelic	https://cancer.sanger.ac.uk/cosmic/mutation/overview?id=20172294	COSM3108276	COSV53172057	38078
POLD1	c.2669C>T	p.A890V	1	CWR22Rv1	19	50918799	50918799	Missense_Mutation	SNP	C	36	23	13	T	monoallelic	https://cancer.sanger.ac.uk/cosmic/mutation/overview?id=53526293	COSM2754647	COSV54532009	38078
ITSN2	c.746G>A	p.R249Q	NA	CWR22Rv1	2	24531533	24531533	Missense_Mutation	SNP	C	10	6	4	T	monoallelic	NA	NA	NA	NA	NA
NCOA1	c.466G>A	p.V156I	2	CWR22Rv1	2	24905931	24905931	Missense_Mutation	SNP	G	26	15	11	A	monoallelic	https://cancer.sanger.ac.uk/cosmic/mutation/overview?id=46022754	COSM2911349	COSV56049693	38745
DCTN1	c.646-1G>T	p.X216_splice	NA	CWR22Rv1	2	74598304	74598304	Splice_Site	SNP	C	43	25	18	A	monoallelic	NA	NA	NA	NA	NA
ACVR2A	c.1310del	p.K437Rfs*5	NA	CWR22Rv1	2	148683686	148683686	Frameshift_Indel	DEL	A	10	0	10	-	biallelic_hom	NA	NA	NA	NA	NA
BARD1	c.1788del	p.K596Nfs*9	NA	CWR22Rv1	2	215610468	215610468	Frameshift_Indel	DEL	T	19	11	8	-	monoallelic	NA	NA	NA	NA	NA
FEV	c.329A>G	p.D110G	NA	CWR22Rv1	2	219846777	219846777	Missense_Mutation	SNP	T	23	5	18	C	monoallelic	NA	NA	NA	NA	NA
ASXL1	c.2042C>T	p.P681L	NA	CWR22Rv1	20	31022557	31022557	Missense_Mutation	SNP	C	33	19	14	T	monoallelic	NA	NA	NA	NA	NA
CHD6	c.3844G>A	p.D1282N	NA	CWR22Rv1	20	40074338	40074338	Missense_Mutation	SNP	C	23	18	5	T	monoallelic	NA	NA	NA	NA	NA
GNAS	c.900dup	p.W301Lfs*33	NA	CWR22Rv1	20	57429216	57429217	Frameshift_Indel	INS	-	26	10	16	C	multi_monoallelic	NA	NA	NA	NA	NA
GNAS	c.1307C>A	p.A436D	NA	CWR22Rv1	20	57429627	57429627	Missense_Mutation	SNP	C	16	5	11	A	multi_monoallelic	NA	NA	NA	NA	NA
MN1	c.1596_1598dup	p.Q550dup	NA	CWR22Rv1	22	28194933	28194934	Inframe_Indel	INS	-	9	2	7	TGC	monoallelic	NA	NA	NA	NA	NA
MYH9	c.311G>A	p.R104H	NA	CWR22Rv1	22	36744971	36744971	Missense_Mutation	SNP	C	16	8	8	T	monoallelic	NA	NA	NA	NA	NA
EP300	c.6970del	p.H2324Tfs*29	NA	CWR22Rv1	22	41574679	41574679	Frameshift_Indel	DEL	C	24	16	8	-	monoallelic	NA	NA	NA	NA	NA
CACNA1D	c.3088G>A	p.V1030M	NA	CWR22Rv1	3	53779672	53779672	Missense_Mutation	SNP	G	32	17	15	A	monoallelic	NA	NA	NA	NA	NA
MITF	c.653C>T	p.A218V	NA	CWR22Rv1	3	69988319	69988319	Missense_Mutation	SNP	C	23	13	10	T	monoallelic	NA	NA	NA	NA	NA
FOXP1	c.898del	p.H300Ifs*27	NA	CWR22Rv1	3	71064782	71064782	Frameshift_Indel	DEL	G	21	13	8	-	monoallelic	NA	NA	NA	NA	NA
MECOM	c.661G>A	p.G221S	NA	CWR22Rv1	3	168838946	168838946	Missense_Mutation	SNP	C	20	14	6	T	monoallelic	NA	NA	NA	NA	NA
PIK3CA	c.1637A>G	p.Q546R	NA	CWR22Rv1	3	178936095	178936095	Missense_Mutation	SNP	A	15	7	8	G	monoallelic	NA	NA	NA	NA	NA
MAP3K13	c.2327C>T	p.T776M	NA	CWR22Rv1	3	185191446	185191446	Missense_Mutation	SNP	C	15	6	9	T	monoallelic	NA	NA	NA	NA	NA
TP63	c.1028G>A	p.R343Q	3	CWR22Rv1	3	189586404	189586404	Missense_Mutation	SNP	G	54	24	30	A	monoallelic	https://cancer.sanger.ac.uk/cosmic/mutation/overview?id=24004310	COSM268529	COSV53215406	38078
PDGFRA	c.169T>C	p.W57R	NA	CWR22Rv1	4	55127381	55127381	Missense_Mutation	SNP	T	40	22	18	C	monoallelic	NA	NA	NA	NA	NA
TET2	c.2551C>T	p.P851S	2	CWR22Rv1	4	106157650	106157650	Missense_Mutation	SNP	C	24	12	12	T	monoallelic	https://cancer.sanger.ac.uk/cosmic/mutation/overview?id=80172082	COSM2952774	COSV54415937	38078
IL2	c.50T>C	p.V17A	1	CWR22Rv1	4	123377546	123377546	Missense_Mutation	SNP	A	13	6	7	G	monoallelic	https://cancer.sanger.ac.uk/cosmic/mutation/overview?id=22029511	COSM1426718	COSV56986646	38078
TERT	c.2354C>T	p.P785L	NA	CWR22Rv1	5	1272328	1272328	Missense_Mutation	SNP	G	47	22	25	A	monoallelic	NA	NA	NA	NA	NA
DROSHA	c.1516G>T	p.A506S	NA	CWR22Rv1	5	31508799	31508799	Missense_Mutation	SNP	C	23	19	4	A	monoallelic	NA	NA	NA	NA	NA
LIFR	c.2267del	p.L756*	NA	CWR22Rv1	5	38489248	38489248	Frameshift_Indel	DEL	A	3	0	3	-	monoallelic	NA	NA	NA	NA	NA
IL6ST	c.1858G>A	p.A620T	NA	CWR22Rv1	5	55243400	55243400	Missense_Mutation	SNP	C	8	4	4	T	monoallelic	NA	NA	NA	NA	NA
CHD1	c.3960del	p.E1321Kfs*22	NA	CWR22Rv1	5	98206409	98206409	Frameshift_Indel	DEL	T	19	7	12	-	monoallelic	NA	NA	NA	NA	NA
EBF1	c.1507C>A	p.P503T	NA	CWR22Rv1	5	158139204	158139204	Missense_Mutation	SNP	G	18	6	12	T	monoallelic	NA	NA	NA	NA	NA
TAP1	c.1631G>A	p.R544H	NA	CWR22Rv1	6	32816544	32816544	Missense_Mutation	SNP	C	21	10	11	T	monoallelic	NA	NA	NA	NA	NA
FANCE	c.929del	p.P310Qfs*54	5	CWR22Rv1	6	35425715	35425715	Frameshift_Indel	DEL	C	14	8	6	-	monoallelic	https://cancer.sanger.ac.uk/cosmic/mutation/overview?id=22574179	COSM4683359	COSV57690795	38078
SRSF3	c.354_356del	p.R119del	NA	CWR22Rv1	6	36568939	36568941	Inframe_Indel	DEL	AGG	14	5	9	-	monoallelic	NA	NA	NA	NA	NA
ZNF292	c.6143_6145dup	p.K2048dup	NA	CWR22Rv1	6	87969483	87969484	Inframe_Indel	INS	-	12	6	6	AAA	monoallelic	NA	NA	NA	NA	NA
FOXO3	c.1517G>A	p.R506H	NA	CWR22Rv1	6	108985553	108985553	Missense_Mutation	SNP	G	27	8	19	A	monoallelic	NA	NA	NA	NA	NA
ROS1	c.6135+1G>A	p.X2045_splice	NA	CWR22Rv1	6	117638305	117638305	Splice_Site	SNP	C	34	18	16	T	monoallelic	NA	NA	NA	NA	NA
BRAF	c.1790T>G	p.L597R	NA	CWR22Rv1	7	140453145	140453145	Missense_Mutation	SNP	A	24	15	9	C	monoallelic	NA	NA	NA	NA	NA
WRN	c.3382dup	p.S1128Kfs*37	NA	CWR22Rv1	8	31001131	31001132	Frameshift_Indel	INS	-	22	16	6	A	monoallelic	NA	NA	NA	NA	NA
NRG1	c.272del	p.K91Sfs*24	15	CWR22Rv1	8	32453511	32453511	Frameshift_Indel	DEL	A	32	14	18	-	monoallelic	https://cancer.sanger.ac.uk/cosmic/mutation/overview?id=33267616	COSM1456726	COSV55149458	38078
IKBKB	c.169C>T	p.R57W	NA	CWR22Rv1	8	42146215	42146215	Missense_Mutation	SNP	C	23	18	5	T	monoallelic	NA	NA	NA	NA	NA
CHD7	c.3973T>C	p.Y1325H	NA	CWR22Rv1	8	61748826	61748826	Missense_Mutation	SNP	T	41	27	14	C	monoallelic	NA	NA	NA	NA	NA
PREX2	c.896G>A	p.R299Q	2	CWR22Rv1	8	68956778	68956778	Missense_Mutation	SNP	G	47	20	27	A	monoallelic	https://cancer.sanger.ac.uk/cosmic/mutation/overview?id=25506582	COSM2874020	COSV55795364	38078
NBN	c.128G>A	p.R43Q	NA	CWR22Rv1	8	90994993	90994993	Missense_Mutation	SNP	C	27	13	14	T	monoallelic	NA	NA	NA	NA	NA
RECQL4	c.2296del	p.X766_splice	NA	CWR22Rv1	8	145738768	145738768	Splice_Site	DEL	G	36	0	36	-	biallelic_hom	NA	NA	NA	NA	NA
JAK2	c.3277G>A	p.G1093R	NA	CWR22Rv1	9	5126432	5126432	Missense_Mutation	SNP	G	19	13	6	A	monoallelic	NA	NA	NA	NA	NA
PTCH1	c.2896G>A	p.A966T	2	CWR22Rv1	9	98220567	98220567	Missense_Mutation	SNP	C	19	7	12	T	multi_monoallelic	https://cancer.sanger.ac.uk/cosmic/mutation/overview?id=29585777	COSM2733217	COSV59479221	38078
PTCH1	c.181G>A	p.A61T	NA	CWR22Rv1	9	98270463	98270463	Missense_Mutation	SNP	C	21	12	9	T	multi_monoallelic	NA	NA	NA	NA	NA
NUP214	c.681dup	p.V228Sfs*9	NA	CWR22Rv1	9	134007992	134007993	Frameshift_Indel	INS	-	17	6	11	A	monoallelic	NA	NA	NA	NA	NA
TSC1	c.-143-1G>A		NA	CWR22Rv1	9	135810483	135810483	Splice_Site	SNP	C	22	16	6	T	monoallelic	NA	NA	NA	NA	NA
NOTCH1	c.6295G>A	p.D2099N	1	CWR22Rv1	9	139391896	139391896	Missense_Mutation	SNP	C	16	7	9	T	multi_monoallelic	https://cancer.sanger.ac.uk/cosmic/mutation/overview?id=20750581	COSM3215862	COSV53045625	45964
NOTCH1	c.6293G>A	p.R2098H	2	CWR22Rv1	9	139391898	139391898	Missense_Mutation	SNP	C	16	7	9	T	multi_monoallelic	https://cancer.sanger.ac.uk/cosmic/mutation/overview?id=20747527	COSM3215864	COSV53054548	38078
BCOR	c.3398A>G	p.D1133G	NA	CWR22Rv1	X	39923693	39923693	Missense_Mutation	SNP	T	14	10	4	C	monoallelic	NA	NA	NA	NA	NA
KDM6A	c.3903G>T	p.K1301N	NA	CWR22Rv1	X	44966679	44966679	Missense_Mutation	SNP	G	7	5	2	T	Noinfo	NA	NA	NA	NA	NA
KDM6A	c.3911A>T	p.Q1304L	NA	CWR22Rv1	X	44966687	44966687	Missense_Mutation	SNP	A	7	5	2	T	Noinfo	NA	NA	NA	NA	NA
KDM6A	c.3918_3919insCTTCAG	p.L1306_R1307insLQ	NA	CWR22Rv1	X	44966693	44966694	Inframe_Indel	INS	-	7	5	2	GCTTCA	Noinfo	NA	NA	NA	NA	NA
KDM5C	c.3811C>T	p.R1271W	NA	CWR22Rv1	X	53223548	53223548	Missense_Mutation	SNP	G	16	0	16	A	biallelic_hom	NA	NA	NA	NA	NA
MSN	c.1153G>A	p.E385K	NA	CWR22Rv1	X	64957102	64957102	Missense_Mutation	SNP	G	13	0	13	A	biallelic_hom	NA	NA	NA	NA	NA
AR	c.169_170insAGCAGCAGC	p.L56_L57insQQQ	NA	CWR22Rv1	X	66765155	66765156	Inframe_Indel	INS	-	8	0	8	GCAGCAGCA	biallelic_hom	NA	NA	NA	NA	NA
AR	c.170T>A	p.L57Q	38	CWR22Rv1	X	66765158	66765158	Missense_Mutation	SNP	T	8	0	8	A	biallelic_hom	https://cancer.sanger.ac.uk/cosmic/mutation/overview?id=38851329	COSM301687	COSV65953290	58047
AR	c.2623C>T	p.H875Y	86	CWR22Rv1	X	66943543	66943543	Missense_Mutation	SNP	C	20	0	20	T	biallelic_hom	https://cancer.sanger.ac.uk/cosmic/mutation/overview?id=38851154	COSM238555	COSV65952830	58047	prostate/carcinoma/NS=42/1953=2.15%;prostate/carcinoma/adenocarcinoma=42/3125=1.34%
MED12	c.6306_6308del	p.Q2115del	4	CWR22Rv1	X	70361098	70361100	Inframe_Indel	DEL	CAG	6	4	2	-	monoallelic	https://cancer.sanger.ac.uk/cosmic/mutation/overview?id=37262725	COSM298366	COSV61334439	38078
P2RY8	c.257G>A	p.R86H	1	CWR22Rv1	Y	1535195	1535195	Missense_Mutation	SNP	C	6	2	4	T	monoallelic	https://cancer.sanger.ac.uk/cosmic/mutation/overview?id=40589625	COSM9065104	COSV101183928	38078
PRDM16	c.2134C>T	p.Q712*	1	DU145	1	3328895	3328895	Nonsense_Mutation	SNP	C	33	13	20	T	monoallelic	https://cancer.sanger.ac.uk/cosmic/mutation/overview?id=20913232	COSM1667089	COSV54596703	38078
MYCL	c.835G>T	p.E279*	1	DU145	1	40363394	40363394	Nonsense_Mutation	SNP	C	24	0	24	A	biallelic_hom	https://cancer.sanger.ac.uk/cosmic/mutation/overview?id=43331912	COSM1667458	COSV65693451	38078
BCL10	c.190A>G	p.R64G	NA	DU145	1	85736457	85736457	Missense_Mutation	SNP	T	25	11	14	C	monoallelic	NA	NA	NA	NA	NA
ATP1A1	c.889G>A	p.G297S	NA	DU145	1	116932195	116932195	Missense_Mutation	SNP	G	20	5	15	A	monoallelic	NA	NA	NA	NA	NA
NOTCH2	c.3246dup	p.A1083Sfs*17	NA	DU145	1	120480570	120480571	Frameshift_Indel	INS	-	38	26	12	T	monoallelic	NA	NA	NA	NA	NA
PDE4DIP	c.6579_6580insCTTGCCCTCCGCAATCTGCTGTCTTAGGGCACTGTAGTCATCAATGTGGCCTAAGACAGTAG	p.I2194Lfs*9	NA	DU145	1	144856905	144856906	Nonsense_Mutation	INS	-	51	46	5	CTACTGTCTTAGGCCACATTGATGACTACAGTGCCCTAAGACAGCAGATTGCGGAGGGCAAG	monoallelic	NA	NA	NA	NA	NA
MUC1	c.437C>T	p.P146L	NA	DU145	1	155161090	155161090	Missense_Mutation	SNP	G	10	7	3	A	monoallelic	NA	NA	NA	NA	NA
FCRL4	c.805A>G	p.N269D	1	DU145	1	157557108	157557108	Missense_Mutation	SNP	T	35	23	12	C	monoallelic	https://cancer.sanger.ac.uk/cosmic/mutation/overview?id=21105991	COSM1668073	COSV54863473	38078
PTPRC	c.2685G>A	p.M895I	NA	DU145	1	198711484	198711484	Missense_Mutation	SNP	G	26	22	4	A	monoallelic	NA	NA	NA	NA	NA
FH	c.94G>A	p.A32T	NA	DU145	1	241682929	241682929	Missense_Mutation	SNP	C	33	10	23	T	monoallelic	NA	NA	NA	NA	NA
ABI1	c.1404G>A	p.M468I	NA	DU145	10	27037622	27037622	Missense_Mutation	SNP	C	21	9	12	T	monoallelic	NA	NA	NA	NA	NA
RET	c.2236C>A	p.L746M	1	DU145	10	43612131	43612131	Missense_Mutation	SNP	C	43	16	27	A	monoallelic	https://cancer.sanger.ac.uk/cosmic/mutation/overview?id=33976419	COSM1675174	COSV60699663	38078
NUTM2B	c.1993C>G	p.Q665E	1	DU145	10	81471597	81471597	Missense_Mutation	SNP	C	16	11	5	G	monoallelic	https://cancer.sanger.ac.uk/cosmic/mutation/overview?id=54113239	COSM3675886	COSV61136509	38078
NUTM2D	c.325T>C	p.F109L	2	DU145	10	89120396	89120396	Missense_Mutation	SNP	T	17	0	17	C	biallelic_hom	https://cancer.sanger.ac.uk/cosmic/mutation/overview?id=48496950	COSM4591792	COSV67745869	38078
NUTM2D	c.1518G>T	p.K506N	NA	DU145	10	89124960	89124960	Missense_Mutation	SNP	G	17	2	15	T	biallelic_hom	NA	NA	NA	NA	NA
WT1	c.994C>G	p.Q332E	2	DU145	11	32438043	32438043	Missense_Mutation	SNP	G	28	0	28	C	biallelic_hom	https://cancer.sanger.ac.uk/cosmic/mutation/overview?id=30088274	COSM1675923	COSV60067907	71672
WT1	c.612C>A	p.S204R	NA	DU145	11	32456280	32456280	Missense_Mutation	SNP	G	23	0	23	T	biallelic_hom	NA	NA	NA	NA	NA
USP28	c.941G>A	p.G314D	NA	DU145	11	113700037	113700037	Missense_Mutation	SNP	C	28	18	10	T	monoallelic	NA	NA	NA	NA	NA
ZBTB16	c.1222G>T	p.V408L	NA	DU145	11	113935244	113935244	Missense_Mutation	SNP	G	34	11	23	T	monoallelic	NA	NA	NA	NA	NA
FLI1	c.790C>A	p.Q264K	NA	DU145	11	128679060	128679060	Missense_Mutation	SNP	C	23	8	15	A	monoallelic	NA	NA	NA	NA	NA
ADAMTS8	c.1989G>T	p.K663N	NA	DU145	11	130278469	130278469	Missense_Mutation	SNP	C	35	11	24	A	monoallelic	NA	NA	NA	NA	NA
ETV6	c.776G>T	p.R259L	NA	DU145	12	12022670	12022670	Missense_Mutation	SNP	G	15	0	15	T	biallelic_hom	NA	NA	NA	NA	NA
KMT2D	c.13435G>C	p.G4479R	NA	DU145	12	49425053	49425053	Missense_Mutation	SNP	C	22	15	7	G	biallelic_het	NA	NA	NA	NA	NA
KMT2D	c.8735A>T	p.D2912V	NA	DU145	12	49432404	49432404	Missense_Mutation	SNP	T	20	6	14	A	biallelic_het	NA	NA	NA	NA	NA
STAT6	c.841dup	p.Q281Pfs*92	7	DU145	12	57499093	57499094	Frameshift_Indel	INS	-	37	21	16	G	monoallelic	https://cancer.sanger.ac.uk/cosmic/mutation/overview?id=25898210	COSM1476773	COSV55669286	38078
WIF1	c.730+1G>T	p.X244_splice	NA	DU145	12	65460420	65460420	Splice_Site	SNP	C	19	5	14	A	monoallelic	NA	NA	NA	NA	NA
NCOR2	c.5509_5517dup	p.S1837_G1839dup	27	DU145	12	124824721	124824722	Inframe_Indel	INS	-	60	0	60	GCCGCTGCT	biallelic_hom	https://cancer.sanger.ac.uk/cosmic/mutation/overview?id=45371441	COSM1359887	COSV62292510	41645
NCOR2	c.1529_1531dup	p.Q510dup	12	DU145	12	124887058	124887059	Inframe_Indel	INS	-	34	5	29	GCT	biallelic_hom	https://cancer.sanger.ac.uk/cosmic/mutation/overview?id=45371257	COSM1476307	COSV62292713	38078	thyroid/other/neoplasm=4/15=26.67%
ZMYM2	c.1525C>G	p.P509A	NA	DU145	13	20593699	20593699	Missense_Mutation	SNP	C	15	0	15	G	biallelic_hom	NA	NA	NA	NA	NA
FLT3	c.2860-2A>T	p.X954_splice	NA	DU145	13	28578313	28578313	Splice_Site	SNP	T	14	10	4	A	monoallelic	NA	NA	NA	NA	NA
BRCA2	c.6851C>T	p.S2284L	1	DU145	13	32918704	32918704	Missense_Mutation	SNP	C	17	0	17	T	biallelic_hom	https://cancer.sanger.ac.uk/cosmic/mutation/overview?id=81517701	COSM2071477	COSV66450211	25748
RB1	c.2143A>T	p.K715*	5	DU145	13	49037903	49037903	Nonsense_Mutation	SNP	A	24	0	24	T	biallelic_hom	https://cancer.sanger.ac.uk/cosmic/mutation/overview?id=22451983	COSM940	COSV57309774	75455
FOXA1	c.1018del	p.A340Rfs*10	NA	DU145	14	38060971	38060971	Frameshift_Indel	DEL	C	30	13	17	-	monoallelic	NA	NA	NA	NA	NA
KTN1	c.659del	p.N220Mfs*4	NA	DU145	14	56083367	56083367	Frameshift_Indel	DEL	A	20	10	10	-	monoallelic	NA	NA	NA	NA	NA
GOLGA5	c.1670A>T	p.Q557L	NA	DU145	14	93290940	93290940	Missense_Mutation	SNP	A	25	14	11	T	monoallelic	NA	NA	NA	NA	NA
NTRK3	c.1822G>T	p.G608C	1	DU145	15	88476310	88476310	Missense_Mutation	SNP	C	38	24	14	A	biallelic_het	https://cancer.sanger.ac.uk/cosmic/mutation/overview?id=32324173	COSM1517967	COSV62297183	38078
NTRK3	c.783del	p.N262Mfs*7	1	DU145	15	88679254	88679254	Frameshift_Indel	DEL	G	45	24	21	-	biallelic_het	https://cancer.sanger.ac.uk/cosmic/mutation/overview?id=32323836	COSM1684419	COSV58129284	38078
CREBBP	c.5293del	p.Q1765Rfs*6	1	DU145	16	3779755	3779755	Frameshift_Indel	DEL	G	32	14	18	-	monoallelic	https://cancer.sanger.ac.uk/cosmic/mutation/overview?id=23203960	COSM2919936	COSV52113025	38078
CIITA	c.3080T>C	p.I1027T	NA	DU145	16	11012314	11012314	Missense_Mutation	SNP	T	23	9	14	C	monoallelic	NA	NA	NA	NA	NA
CDH11	c.1787A>G	p.D596G	NA	DU145	16	64984777	64984777	Missense_Mutation	SNP	T	26	19	7	C	monoallelic	NA	NA	NA	NA	NA
ZFHX3	c.10579_10581dup	p.G3527dup	2	DU145	16	72821593	72821594	Inframe_Indel	INS	-	19	6	13	GCC	biallelic_het	https://cancer.sanger.ac.uk/cosmic/mutation/overview?id=23036113	COSM1724706	COSV51713020	38078
ZFHX3	c.7154C>T	p.P2385L	1	DU145	16	72829427	72829427	Missense_Mutation	SNP	G	19	13	6	A	biallelic_het	https://cancer.sanger.ac.uk/cosmic/mutation/overview?id=23034446	COSM1679262	COSV51723887	38078
TP53	c.820G>T	p.V274F	53	DU145	17	7577118	7577118	Missense_Mutation	SNP	C	18	1	17	A	biallelic_hom	https://cancer.sanger.ac.uk/cosmic/mutation/overview?id=23647100	COSM10769	COSV52707923	167988
TP53	c.668C>T	p.P223L	10	DU145	17	7578181	7578181	Missense_Mutation	SNP	G	16	12	4	A	biallelic_hom	https://cancer.sanger.ac.uk/cosmic/mutation/overview?id=23686171	COSM12193	COSV52728555	167988
GAS7	c.790G>T	p.A264S	NA	DU145	17	9843459	9843459	Missense_Mutation	SNP	C	27	21	6	A	monoallelic	NA	NA	NA	NA	NA
NF1	c.7415C>A	p.P2472H	3	DU145	17	29677294	29677294	Missense_Mutation	SNP	C	24	11	13	A	monoallelic	https://cancer.sanger.ac.uk/cosmic/mutation/overview?id=34058915	COSM24499	COSV62196132	72135
SUZ12	c.586del	p.R196Efs*4	NA	DU145	17	30300239	30300239	Frameshift_Indel	DEL	A	16	10	6	-	monoallelic	NA	NA	NA	NA	NA
MLLT6	c.1976G>T	p.R659L	1	DU145	17	36875803	36875803	Missense_Mutation	SNP	G	39	25	14	T	monoallelic	https://cancer.sanger.ac.uk/cosmic/mutation/overview?id=28120794	COSM2837334	COSV57833962	38078
BRCA1	c.2884G>A	p.E962K	NA	DU145	17	41244664	41244664	Missense_Mutation	SNP	C	35	28	7	T	monoallelic	NA	NA	NA	NA	NA
HLF	c.301C>T	p.P101S	NA	DU145	17	53345297	53345297	Missense_Mutation	SNP	C	24	14	10	T	biallelic_het	NA	NA	NA	NA	NA
HLF	c.376C>A	p.L126I	NA	DU145	17	53345372	53345372	Missense_Mutation	SNP	C	26	15	11	A	biallelic_het	NA	NA	NA	NA	NA
AXIN2	c.1369G>T	p.V457L	1	DU145	17	63533785	63533785	Missense_Mutation	SNP	C	42	17	25	A	monoallelic	https://cancer.sanger.ac.uk/cosmic/mutation/overview?id=24763441	COSM5494501	COSV61056738	38078
PRKAR1A	c.441-1G>A	p.X147_splice	NA	DU145	17	66520156	66520156	Splice_Site	SNP	G	30	21	9	A	monoallelic	NA	NA	NA	NA	NA
RNF213	c.15295G>C	p.G5099R	NA	DU145	17	78363821	78363821	Missense_Mutation	SNP	G	13	9	4	C	monoallelic	NA	NA	NA	NA	NA
STK11	c.532_536del	p.K178Gfs*86	NA	DU145	19	1220438	1220442	Frameshift_Indel	DEL	CAAGC	32	0	32	-	biallelic_hom	NA	NA	NA	NA	NA
SMARCA4	c.1761G>T	p.K587N	1	DU145	19	11107056	11107056	Missense_Mutation	SNP	G	23	0	23	T	biallelic_hom	https://cancer.sanger.ac.uk/cosmic/mutation/overview?id=53213603	COSM7342754	COSV100759024	20636
BRD4	c.3061del	p.H1021Ifs*47	NA	DU145	19	15353819	15353819	Frameshift_Indel	DEL	G	6	2	4	-	monoallelic	NA	NA	NA	NA	NA
AKT2	c.395C>T	p.T132M	NA	DU145	19	40748487	40748487	Missense_Mutation	SNP	G	23	17	6	A	monoallelic	NA	NA	NA	NA	NA
ERF	c.394G>T	p.A132S	NA	DU145	19	42753870	42753870	Missense_Mutation	SNP	C	39	20	19	A	monoallelic	NA	NA	NA	NA	NA
CIC	c.2117C>T	p.T706I	NA	DU145	19	42778052	42778052	Missense_Mutation	SNP	C	25	13	12	T	biallelic_het	NA	NA	NA	NA	NA
CIC	c.4790del	p.P1597Hfs*23	13	DU145	19	42799300	42799300	Frameshift_Indel	DEL	C	36	10	26	-	biallelic_het	https://cancer.sanger.ac.uk/cosmic/mutation/overview?id=88869135	COSM1737906	COSV50561717	55179
ZNF331	c.1339G>T	p.A447S	NA	DU145	19	54081153	54081153	Missense_Mutation	SNP	G	15	0	15	T	biallelic_hom	NA	NA	NA	NA	NA
ITSN2	c.670G>T	p.A224S	NA	DU145	2	24531609	24531609	Missense_Mutation	SNP	C	18	4	14	A	monoallelic	NA	NA	NA	NA	NA
STRN	c.1706C>T	p.T569M	NA	DU145	2	37085130	37085130	Missense_Mutation	SNP	G	29	14	15	A	monoallelic	NA	NA	NA	NA	NA
MSH6	c.3200G>T	p.S1067I	NA	DU145	2	48030586	48030586	Missense_Mutation	SNP	G	39	18	21	T	monoallelic	NA	NA	NA	NA	NA
BCL11A	c.1078del	p.L360Sfs*61	NA	DU145	2	60688969	60688969	Frameshift_Indel	DEL	G	9	5	4	-	monoallelic	NA	NA	NA	NA	NA
LRP1B	c.9961C>A	p.Q3321K	NA	DU145	2	141214026	141214026	Missense_Mutation	SNP	G	17	11	6	T	biallelic_het	NA	NA	NA	NA	NA
LRP1B	c.7060G>T	p.A2354S	NA	DU145	2	141356334	141356334	Missense_Mutation	SNP	C	17	7	10	A	biallelic_het	NA	NA	NA	NA	NA
LRP1B	c.3370G>A	p.D1124N	1	DU145	2	141665596	141665596	Missense_Mutation	SNP	C	9	6	3	T	biallelic_het	https://cancer.sanger.ac.uk/cosmic/mutation/overview?id=41440664	COSM3117504	COSV67267437	38078
LRP1B	c.2509C>G	p.P837A	NA	DU145	2	141751699	141751699	Missense_Mutation	SNP	G	13	5	8	C	biallelic_het	NA	NA	NA	NA	NA
ACVR2A	c.1310del	p.K437Rfs*5	NA	DU145	2	148683686	148683686	Frameshift_Indel	DEL	A	15	11	4	-	monoallelic	NA	NA	NA	NA	NA
ACVR1	c.271G>A	p.V91M	NA	DU145	2	158636909	158636909	Missense_Mutation	SNP	C	22	17	5	T	monoallelic	NA	NA	NA	NA	NA
PMS1	c.910G>T	p.A304S	NA	DU145	2	190718752	190718752	Missense_Mutation	SNP	G	27	7	20	T	monoallelic	NA	NA	NA	NA	NA
SF3B1	c.3835G>T	p.A1279S	NA	DU145	2	198257107	198257107	Missense_Mutation	SNP	C	24	14	10	A	monoallelic	NA	NA	NA	NA	NA
FEV	c.209G>A	p.G70D	NA	DU145	2	219846897	219846897	Missense_Mutation	SNP	C	29	21	8	T	biallelic_het	NA	NA	NA	NA	NA
FEV	c.208G>A	p.G70S	NA	DU145	2	219846898	219846898	Missense_Mutation	SNP	C	29	21	8	T	biallelic_het	NA	NA	NA	NA	NA
FEV	c.91C>T	p.P31S	NA	DU145	2	219848989	219848989	Missense_Mutation	SNP	G	28	12	16	A	biallelic_het	NA	NA	NA	NA	NA
PAX3	c.808C>T	p.R270C	1	DU145	2	223086091	223086091	Missense_Mutation	SNP	G	20	14	6	A	monoallelic	https://cancer.sanger.ac.uk/cosmic/mutation/overview?id=42314105	COSM1669796	COSV60589510	38078
CHD6	c.5553A>C	p.K1851N	1	DU145	20	40049722	40049722	Missense_Mutation	SNP	T	24	7	17	G	monoallelic	https://cancer.sanger.ac.uk/cosmic/mutation/overview?id=36469418	COSM1681680	COSV64692196	38078
PTPRT	c.2285T>A	p.L762Q	NA	DU145	20	40877354	40877354	Missense_Mutation	SNP	A	26	15	11	T	monoallelic	NA	NA	NA	NA	NA
GNAS	c.325C>T	p.P109S	NA	DU145	20	57428645	57428645	Missense_Mutation	SNP	C	13	9	4	T	biallelic_het	NA	NA	NA	NA	NA
GNAS	c.1639C>A	p.R547S	NA	DU145	20	57429959	57429959	Missense_Mutation	SNP	C	17	2	15	A	biallelic_het	NA	NA	NA	NA	NA
NF2	c.1181_1183del	p.E394del	NA	DU145	22	30069309	30069311	Inframe_Indel	DEL	GAG	20	0	20	-	biallelic_hom	NA	NA	NA	NA	NA
MLH1	c.117-2A>T	p.X39_splice	NA	DU145	3	37038108	37038108	Splice_Site	SNP	A	26	0	26	T	biallelic_hom	NA	NA	NA	NA	NA
MLH1	c.1757C>T	p.A586V	NA	DU145	3	37089035	37089035	Missense_Mutation	SNP	C	28	14	14	T	biallelic_hom	NA	NA	NA	NA	NA
CTNNB1	c.914C>G	p.A305G	1	DU145	3	41267330	41267330	Missense_Mutation	SNP	C	19	0	19	G	biallelic_hom	https://cancer.sanger.ac.uk/cosmic/mutation/overview?id=32709278	COSM2987957	COSV62693008	69668
DHX30	c.1954T>G	p.L652V	NA	DU145	3	47888787	47888787	Missense_Mutation	SNP	T	17	0	17	G	biallelic_hom	NA	NA	NA	NA	NA
POLQ	c.370G>A	p.V124M	NA	DU145	3	121260300	121260300	Missense_Mutation	SNP	C	20	9	11	T	monoallelic	NA	NA	NA	NA	NA
MECOM	c.2929del	p.T977Qfs*6	1	DU145	3	168807891	168807891	Frameshift_Indel	DEL	T	34	7	27	-	monoallelic	https://cancer.sanger.ac.uk/cosmic/mutation/overview?id=23853990	COSM1683968	COSV52967722	38078
ETV5	c.1177G>T	p.G393C	NA	DU145	3	185774896	185774896	Missense_Mutation	SNP	C	22	5	17	A	monoallelic	NA	NA	NA	NA	NA
PDGFRA	c.723G>T	p.E241D	NA	DU145	4	55131180	55131180	Missense_Mutation	SNP	G	21	6	15	T	monoallelic	NA	NA	NA	NA	NA
KDR	c.1397G>T	p.C466F	2	DU145	4	55973919	55973919	Missense_Mutation	SNP	C	14	10	4	A	monoallelic	https://cancer.sanger.ac.uk/cosmic/mutation/overview?id=22440387	COSM1671032	COSV55760050	61728
PTPN13	c.6725del	p.N2242Tfs*60	NA	DU145	4	87726484	87726484	Frameshift_Indel	DEL	A	24	12	12	-	multi_monoallelic	NA	NA	NA	NA	NA
PTPN13	c.6989A>G	p.N2330S	NA	DU145	4	87728941	87728941	Missense_Mutation	SNP	A	18	10	8	G	multi_monoallelic	NA	NA	NA	NA	NA
AFF1	c.89G>A	p.R30H	NA	DU145	4	87967368	87967368	Missense_Mutation	SNP	G	19	14	5	A	monoallelic	NA	NA	NA	NA	NA
TET2	c.685dup	p.T229Nfs*25	10	DU145	4	106155778	106155779	Frameshift_Indel	INS	-	29	15	14	A	monoallelic	https://cancer.sanger.ac.uk/cosmic/mutation/overview?id=80167560	COSM110749	COSV54401530	75679
FAT1	c.11477G>T	p.C3826F	NA	DU145	4	187524062	187524062	Missense_Mutation	SNP	C	3	0	3	A	biallelic_hom	NA	NA	NA	NA	NA
FAT1	c.9683del	p.P3228Lfs*42	4	DU145	4	187532710	187532710	Frameshift_Indel	DEL	G	14	0	14	-	biallelic_hom	https://cancer.sanger.ac.uk/cosmic/mutation/overview?id=57344908	COSM3131510	COSV71673066	54916
DROSHA	c.1516G>T	p.A506S	NA	DU145	5	31508799	31508799	Missense_Mutation	SNP	C	55	29	26	A	monoallelic	NA	NA	NA	NA	NA
HLA-A	c.542G>C	p.R181T	NA	DU145	6	29911243	29911243	Missense_Mutation	SNP	G	27	23	4	C	monoallelic	NA	NA	NA	NA	NA
HSP90AB1	c.730G>A	p.D244N	NA	DU145	6	44218109	44218109	Missense_Mutation	SNP	G	41	33	8	A	monoallelic	NA	NA	NA	NA	NA
RSPO3	c.524G>A	p.R175Q	NA	DU145	6	127476473	127476473	Missense_Mutation	SNP	G	20	0	20	A	biallelic_hom	NA	NA	NA	NA	NA
PTPRK	c.3835A>G	p.M1279V	1	DU145	6	128298094	128298094	Missense_Mutation	SNP	T	18	0	18	C	biallelic_hom	https://cancer.sanger.ac.uk/cosmic/mutation/overview?id=36026341	COSM1672737	COSV63901441	38078
PTPRK	c.402del	p.A135Pfs*7	NA	DU145	6	128643277	128643277	Frameshift_Indel	DEL	A	20	14	6	-	biallelic_hom	NA	NA	NA	NA	NA
TNFAIP3	c.1906+1G>A	p.X636_splice	NA	DU145	6	138200489	138200489	Splice_Site	SNP	G	7	2	5	A	monoallelic	NA	NA	NA	NA	NA
HIP1	c.1095A>T	p.Q365H	1	DU145	7	75191400	75191400	Missense_Mutation	SNP	T	22	5	17	A	monoallelic	https://cancer.sanger.ac.uk/cosmic/mutation/overview?id=28383833	COSM1673221	COSV61187924	38078
SAMD9	c.2438C>G	p.S813C	NA	DU145	7	92732973	92732973	Missense_Mutation	SNP	G	42	24	18	C	monoallelic	NA	NA	NA	NA	NA
SLC4A2	c.815T>C	p.L272P	NA	DU145	7	150763840	150763840	Missense_Mutation	SNP	T	27	9	18	C	monoallelic	NA	NA	NA	NA	NA
KMT2C	c.13488del	p.F4496Lfs*21	15	DU145	7	151845524	151845524	Frameshift_Indel	DEL	A	22	15	7	-	monoallelic	https://cancer.sanger.ac.uk/cosmic/mutation/overview?id=22733289	COSM1181043	COSV51394086	63101
PREX2	c.77G>A	p.C26Y	NA	DU145	8	68864706	68864706	Missense_Mutation	SNP	G	34	22	12	A	biallelic_het	NA	NA	NA	NA	NA
PREX2	c.422C>G	p.T141R	NA	DU145	8	68934356	68934356	Missense_Mutation	SNP	C	29	14	15	G	biallelic_het	NA	NA	NA	NA	NA
PREX2	c.944C>G	p.A315G	NA	DU145	8	68965332	68965332	Missense_Mutation	SNP	C	22	12	10	G	biallelic_het	NA	NA	NA	NA	NA
PREX2	c.4690G>T	p.D1564Y	NA	DU145	8	69129936	69129936	Missense_Mutation	SNP	G	22	13	9	T	biallelic_het	NA	NA	NA	NA	NA
RUNX1T1	c.1505C>T	p.A502V	NA	DU145	8	92982953	92982953	Missense_Mutation	SNP	G	19	11	8	A	monoallelic	NA	NA	NA	NA	NA
UBR5	c.6360del	p.E2121Kfs*28	NA	DU145	8	103289349	103289349	Frameshift_Indel	DEL	T	20	10	10	-	multi_monoallelic	NA	NA	NA	NA	NA
UBR5	c.4623G>T	p.R1541S	NA	DU145	8	103301771	103301771	Missense_Mutation	SNP	C	15	9	6	A	multi_monoallelic	NA	NA	NA	NA	NA
NDRG1	c.529G>T	p.A177S	NA	DU145	8	134269028	134269028	Missense_Mutation	SNP	C	32	20	12	A	monoallelic	NA	NA	NA	NA	NA
RECQL4	c.2296del	p.X766_splice	NA	DU145	8	145738768	145738768	Splice_Site	DEL	G	27	0	27	-	biallelic_hom	NA	NA	NA	NA	NA
CDKN2A	c.250G>T	p.D84Y	28	DU145	9	21971108	21971108	Missense_Mutation	SNP	C	27	0	27	A	biallelic_hom	https://cancer.sanger.ac.uk/cosmic/mutation/overview?id=67050544	COSM13299	COSV58683210	100287
PAX5	c.590G>A	p.R197H	5	DU145	9	37002659	37002659	Missense_Mutation	SNP	C	46	27	19	T	monoallelic	https://cancer.sanger.ac.uk/cosmic/mutation/overview?id=33698178	COSM1195900	COSV63906247	57275
SYK	c.1865T>C	p.V622A	NA	DU145	9	93657839	93657839	Missense_Mutation	SNP	T	35	13	22	C	monoallelic	NA	NA	NA	NA	NA
XPA	c.459_460del	p.C153*	NA	DU145	9	100449473	100449474	Nonsense_Mutation	DEL	CA	26	13	13	-	monoallelic	NA	NA	NA	NA	NA
KLF4	c.1321G>T	p.D441Y	NA	DU145	9	110248151	110248151	Missense_Mutation	SNP	C	32	24	8	A	monoallelic	NA	NA	NA	NA	NA
TSC1	c.3100G>T	p.G1034C	NA	DU145	9	135772017	135772017	Missense_Mutation	SNP	C	23	9	14	A	monoallelic	NA	NA	NA	NA	NA
BRD3	c.28G>A	p.A10T	NA	DU145	9	136918572	136918572	Missense_Mutation	SNP	C	21	12	9	T	monoallelic	NA	NA	NA	NA	NA
DDX3X	n.3041-2A>T		NA	DU145	X	41217084	41217084	Splice_Site	SNP	A	17	0	17	T	biallelic_hom	NA	NA	NA	NA	NA
TFE3	c.52G>T	p.G18C	NA	DU145	X	48900701	48900701	Missense_Mutation	SNP	C	7	0	7	A	biallelic_hom	NA	NA	NA	NA	NA
KDM5C	c.2405G>A	p.R802H	NA	DU145	X	53227783	53227783	Missense_Mutation	SNP	C	22	16	6	T	monoallelic	NA	NA	NA	NA	NA
AR	c.1418_1420dup	p.G473dup	2	DU145	X	66766356	66766357	Inframe_Indel	INS	-	8	5	3	GGC	monoallelic	https://cancer.sanger.ac.uk/cosmic/mutation/overview?id=38859937	COSM9498457	COSV104687717	38078
IRS4	c.1772dup	p.K592Qfs*12	18	DU145	X	107977802	107977803	Frameshift_Indel	INS	-	16	10	6	C	Noinfo	https://cancer.sanger.ac.uk/cosmic/mutation/overview?id=35707214	COSM391267	COSV64532875	38078	NS/malignant_melanoma/NS=5/101=4.95%
IRS4	c.1288G>A	p.A430T	NA	DU145	X	107978287	107978287	Missense_Mutation	SNP	C	7	5	2	T	Noinfo	NA	NA	NA	NA	NA
P2RY8	c.373G>A	p.V125I	2	DU145	Y	1535079	1535079	Missense_Mutation	SNP	C	6	0	6	T	biallelic_hom	https://cancer.sanger.ac.uk/cosmic/mutation/overview?id=40589038	COSM457167	COSV67177266	38078
CAMTA1	c.2539C>T	p.H847Y	NA	LAPC4-CR	1	7725146	7725146	Missense_Mutation	SNP	C	19	7	12	T	biallelic_het	NA	NA	NA	NA	NA
CAMTA1	c.4767del	p.K1589Nfs*33	11	LAPC4-CR	1	7811329	7811329	Frameshift_Indel	DEL	A	43	32	11	-	biallelic_het	https://cancer.sanger.ac.uk/cosmic/mutation/overview?id=25208976	COSM309839	COSV57887770	38078	NS/malignant_melanoma/NS=6/101=5.94%
MTOR	c.6053G>A	p.R2018Q	NA	LAPC4-CR	1	11187844	11187844	Missense_Mutation	SNP	C	31	19	12	T	biallelic_het	NA	NA	NA	NA	NA
MTOR	c.4555G>A	p.A1519T	NA	LAPC4-CR	1	11210198	11210198	Missense_Mutation	SNP	C	28	9	19	T	biallelic_het	NA	NA	NA	NA	NA
SPEN	c.4994C>T	p.A1665V	NA	LAPC4-CR	1	16257729	16257729	Missense_Mutation	SNP	C	26	19	7	T	monoallelic	NA	NA	NA	NA	NA
ARID1A	c.3667C>A	p.R1223S	NA	LAPC4-CR	1	27099430	27099430	Missense_Mutation	SNP	C	25	11	14	A	biallelic_het	NA	NA	NA	NA	NA
ARID1A	c.5693del	p.P1898Hfs*25	NA	LAPC4-CR	1	27106078	27106078	Frameshift_Indel	DEL	C	4	0	4	-	biallelic_het	NA	NA	NA	NA	NA
ARID1A	c.6419_6420dup	p.F2141Pfs*60	NA	LAPC4-CR	1	27106803	27106804	Frameshift_Indel	INS	-	14	4	10	CC	biallelic_het	NA	NA	NA	NA	NA
SFPQ	c.1532del	p.N511Tfs*2	NA	LAPC4-CR	1	35654867	35654867	Frameshift_Indel	DEL	T	3	0	3	-	monoallelic	NA	NA	NA	NA	NA
CSF3R	c.1822del	p.A608Pfs*9	NA	LAPC4-CR	1	36933465	36933465	Frameshift_Indel	DEL	C	27	20	7	-	monoallelic	NA	NA	NA	NA	NA
MUTYH	c.1411C>T	p.R471C	2	LAPC4-CR	1	45796910	45796910	Missense_Mutation	SNP	G	23	11	12	A	monoallelic	https://cancer.sanger.ac.uk/cosmic/mutation/overview?id=35641343	COSM162695	COSV58343650	53682
CDKN2C	c.18del	p.N7Tfs*12	NA	LAPC4-CR	1	51436054	51436054	Frameshift_Indel	DEL	G	22	5	17	-	monoallelic	NA	NA	NA	NA	NA
EPS15	c.2432G>A	p.G811D	1	LAPC4-CR	1	51826955	51826955	Missense_Mutation	SNP	C	23	8	15	T	monoallelic	https://cancer.sanger.ac.uk/cosmic/mutation/overview?id=37753325	COSM6005643	COSV65540717	916
JAK1	c.3322T>G	p.L1108V	1	LAPC4-CR	1	65301126	65301126	Missense_Mutation	SNP	A	21	9	12	C	biallelic_het	https://cancer.sanger.ac.uk/cosmic/mutation/overview?id=29882254	COSM6005665	COSV53805331	27195
JAK1	c.3071del	p.L1024*	NA	LAPC4-CR	1	65303684	65303684	Frameshift_Indel	DEL	A	19	11	8	-	biallelic_het	NA	NA	NA	NA	NA
JAK1	c.1289del	p.P430Rfs*2	22	LAPC4-CR	1	65325833	65325833	Frameshift_Indel	DEL	G	15	7	8	-	biallelic_het	https://cancer.sanger.ac.uk/cosmic/mutation/overview?id=29880709	COSM1560531	COSV61087940	65273
JAK1	c.355A>T	p.T119S	NA	LAPC4-CR	1	65339181	65339181	Missense_Mutation	SNP	T	21	8	13	A	biallelic_het	NA	NA	NA	NA	NA
BCL10	c.499del	p.S167Lfs*6	NA	LAPC4-CR	1	85733513	85733513	Frameshift_Indel	DEL	A	19	9	10	-	monoallelic	NA	NA	NA	NA	NA
TRIM33	c.3133_3135del	p.V1045del	NA	LAPC4-CR	1	114940598	114940600	Inframe_Indel	DEL	AAC	14	7	7	-	monoallelic	NA	NA	NA	NA	NA
ATP1A1	c.1440A>G	p.I480M	NA	LAPC4-CR	1	116935583	116935583	Missense_Mutation	SNP	A	21	12	9	G	monoallelic	NA	NA	NA	NA	NA
BCL9	c.2912del	p.P971Hfs*11	4	LAPC4-CR	1	147094076	147094076	Frameshift_Indel	DEL	C	35	24	11	-	monoallelic	https://cancer.sanger.ac.uk/cosmic/mutation/overview?id=23520115	COSM1333670	COSV52340276	38078
RPRD2	c.3361C>T	p.R1121C	4	LAPC4-CR	1	150444785	150444785	Missense_Mutation	SNP	C	38	18	20	T	biallelic_het	https://cancer.sanger.ac.uk/cosmic/mutation/overview?id=35326326	COSM3740634	COSV64818971	38078
RPRD2	c.3692C>T	p.A1231V	NA	LAPC4-CR	1	150445116	150445116	Missense_Mutation	SNP	C	43	19	24	T	biallelic_het	NA	NA	NA	NA	NA
PRCC	c.848C>A	p.A283D	NA	LAPC4-CR	1	156756731	156756731	Missense_Mutation	SNP	C	27	9	18	A	monoallelic	NA	NA	NA	NA	NA
ETV3	c.1416dup	p.K473Qfs*10	NA	LAPC4-CR	1	157094755	157094756	Frameshift_Indel	INS	-	27	18	9	G	monoallelic	NA	NA	NA	NA	NA
PBX1	c.430T>C	p.S144P	NA	LAPC4-CR	1	164761895	164761895	Missense_Mutation	SNP	T	43	22	21	C	monoallelic	NA	NA	NA	NA	NA
TPR	c.2796_2798del	p.E932del	NA	LAPC4-CR	1	186316569	186316571	Inframe_Indel	DEL	TCT	26	18	8	-	monoallelic	NA	NA	NA	NA	NA
PTPRC	c.1037A>T	p.N346I	NA	LAPC4-CR	1	198678819	198678819	Missense_Mutation	SNP	A	27	15	12	T	biallelic_het	NA	NA	NA	NA	NA
PTPRC	c.1985G>A	p.R662Q	NA	LAPC4-CR	1	198701439	198701439	Missense_Mutation	SNP	G	32	23	9	A	biallelic_het	NA	NA	NA	NA	NA
MDM4	c.95C>T	p.P32L	NA	LAPC4-CR	1	204495504	204495504	Missense_Mutation	SNP	C	27	12	15	T	monoallelic	NA	NA	NA	NA	NA
TET1	c.5166G>T	p.K1722N	NA	LAPC4-CR	10	70446226	70446226	Missense_Mutation	SNP	G	17	10	7	T	multi_monoallelic	NA	NA	NA	NA	NA
TET1	c.6088A>G	p.T2030A	NA	LAPC4-CR	10	70451248	70451248	Missense_Mutation	SNP	A	37	29	8	G	multi_monoallelic	NA	NA	NA	NA	NA
NDST2	c.736C>T	p.R246W	NA	LAPC4-CR	10	75567411	75567411	Missense_Mutation	SNP	G	18	9	9	A	monoallelic	NA	NA	NA	NA	NA
NUTM2B	c.794del	p.G265Afs*110	NA	LAPC4-CR	10	81466205	81466205	Frameshift_Indel	DEL	G	33	25	8	-	multi_monoallelic	NA	NA	NA	NA	NA
NUTM2B	c.880T>C	p.S294P	NA	LAPC4-CR	10	81466295	81466295	Missense_Mutation	SNP	T	25	19	6	C	multi_monoallelic	NA	NA	NA	NA	NA
NUTM2D	c.325T>C	p.F109L	2	LAPC4-CR	10	89120396	89120396	Missense_Mutation	SNP	T	22	0	22	C	biallelic_hom	https://cancer.sanger.ac.uk/cosmic/mutation/overview?id=48496950	COSM4591792	COSV67745869	38078
TLX1	c.374C>T	p.A125V	NA	LAPC4-CR	10	102891672	102891672	Missense_Mutation	SNP	C	26	18	8	T	monoallelic	NA	NA	NA	NA	NA
NFKB2	c.202G>A	p.A68T	NA	LAPC4-CR	10	104156539	104156539	Missense_Mutation	SNP	G	22	7	15	A	monoallelic	NA	NA	NA	NA	NA
CARS	c.184del	p.Q62Sfs*12	NA	LAPC4-CR	11	3069073	3069073	Frameshift_Indel	DEL	G	26	19	7	-	monoallelic	NA	NA	NA	NA	NA
LMO1	c.128A>G	p.Y43C	NA	LAPC4-CR	11	8251949	8251949	Missense_Mutation	SNP	T	19	9	10	C	monoallelic	NA	NA	NA	NA	NA
WT1	c.113G>A	p.G38D	1	LAPC4-CR	11	32456779	32456779	Missense_Mutation	SNP	C	22	17	5	T	monoallelic	https://cancer.sanger.ac.uk/cosmic/mutation/overview?id=30091006	COSM5483559	COSV60075060	38078
EXT2	c.1179-2A>G	p.X393_splice	NA	LAPC4-CR	11	44151593	44151593	Splice_Site	SNP	A	15	10	5	G	monoallelic	NA	NA	NA	NA	NA
CREB3L1	c.842T>C	p.L281P	NA	LAPC4-CR	11	46333964	46333964	Missense_Mutation	SNP	T	47	33	14	C	monoallelic	NA	NA	NA	NA	NA
NUMA1	c.5020C>T	p.R1674C	NA	LAPC4-CR	11	71720051	71720051	Missense_Mutation	SNP	G	28	20	8	A	monoallelic	NA	NA	NA	NA	NA
PICALM	c.584C>T	p.A195V	NA	LAPC4-CR	11	85723398	85723398	Missense_Mutation	SNP	G	26	10	16	A	monoallelic	NA	NA	NA	NA	NA
ATM	c.5318del	p.K1773Sfs*3	NA	LAPC4-CR	11	108172510	108172510	Frameshift_Indel	DEL	A	24	19	5	-	multi_monoallelic	NA	NA	NA	NA	NA
ATM	c.5674+1G>T	p.X1892_splice	NA	LAPC4-CR	11	108175580	108175580	Splice_Site	SNP	G	28	23	5	T	multi_monoallelic	NA	NA	NA	NA	NA
DDX10	c.238del	p.T80Hfs*2	NA	LAPC4-CR	11	108544239	108544239	Frameshift_Indel	DEL	A	30	22	8	-	monoallelic	NA	NA	NA	NA	NA
USP28	c.378G>A	p.M126I	NA	LAPC4-CR	11	113711476	113711476	Missense_Mutation	SNP	C	30	25	5	T	monoallelic	NA	NA	NA	NA	NA
BCL9L	c.94_95insT	p.P32Lfs*12	NA	LAPC4-CR	11	118779296	118779297	Frameshift_Indel	INS	-	23	13	10	A	monoallelic	NA	NA	NA	NA	NA
CBL	c.2015C>T	p.A672V	NA	LAPC4-CR	11	119158635	119158635	Missense_Mutation	SNP	C	32	6	26	T	monoallelic	NA	NA	NA	NA	NA
ARHGEF12	c.3583C>T	p.H1195Y	NA	LAPC4-CR	11	120348915	120348915	Missense_Mutation	SNP	C	27	19	8	T	monoallelic	NA	NA	NA	NA	NA
KCNJ5	c.616G>A	p.A206T	NA	LAPC4-CR	11	128781784	128781784	Missense_Mutation	SNP	G	46	28	18	A	biallelic_het	NA	NA	NA	NA	NA
KCNJ5	c.989del	p.G330Afs*41	NA	LAPC4-CR	11	128786352	128786352	Frameshift_Indel	DEL	G	66	25	41	-	biallelic_het	NA	NA	NA	NA	NA
KDM5A	c.3597del	p.G1200Dfs*9	35	LAPC4-CR	12	416953	416953	Frameshift_Indel	DEL	T	20	14	6	-	biallelic_het	https://cancer.sanger.ac.uk/cosmic/mutation/overview?id=44678327	COSM1180773	COSV66990113	54115	endometrium/carcinoma/endometrioid_carcinoma=4/95=4.21%
KDM5A	c.3091C>G	p.R1031G	NA	LAPC4-CR	12	420176	420176	Missense_Mutation	SNP	G	24	9	15	C	biallelic_het	NA	NA	NA	NA	NA
KDM5A	c.3048T>G	p.N1016K	NA	LAPC4-CR	12	420219	420219	Missense_Mutation	SNP	A	23	7	16	C	biallelic_het	NA	NA	NA	NA	NA
ERC1	c.2414del	p.K805Rfs*7	NA	LAPC4-CR	12	1345991	1345991	Frameshift_Indel	DEL	A	36	22	14	-	monoallelic	NA	NA	NA	NA	NA
CHD4	c.3503del	p.K1168Rfs*2	NA	LAPC4-CR	12	6697078	6697078	Frameshift_Indel	DEL	T	19	13	6	-	Noinfo	NA	NA	NA	NA	NA
CHD4	c.3336C>A	p.F1112L	NA	LAPC4-CR	12	6700636	6700636	Missense_Mutation	SNP	G	18	5	13	T	Noinfo	NA	NA	NA	NA	NA
KMT2D	c.10622C>A	p.A3541D	NA	LAPC4-CR	12	49427968	49427968	Missense_Mutation	SNP	G	34	11	23	T	biallelic_het	NA	NA	NA	NA	NA
KMT2D	c.4907G>A	p.G1636D	1	LAPC4-CR	12	49438583	49438583	Missense_Mutation	SNP	C	26	17	9	T	biallelic_het	https://cancer.sanger.ac.uk/cosmic/mutation/overview?id=26492800	COSM1215199	COSV56477496	38078
KMT2D	c.1295C>T	p.A432V	1	LAPC4-CR	12	49446171	49446171	Missense_Mutation	SNP	G	19	2	17	A	biallelic_het	https://cancer.sanger.ac.uk/cosmic/mutation/overview?id=26466306	COSM7344535	COSV99040257	25533
SMARCD1	c.412C>T	p.R138C	1	LAPC4-CR	12	50480542	50480542	Missense_Mutation	SNP	C	14	8	6	T	monoallelic	https://cancer.sanger.ac.uk/cosmic/mutation/overview?id=41957936	COSM6971058	COSV57319921	15503
LRIG3	c.2761C>T	p.P921S	1	LAPC4-CR	12	59268290	59268290	Missense_Mutation	SNP	G	30	10	20	A	monoallelic	https://cancer.sanger.ac.uk/cosmic/mutation/overview?id=27769432	COSM9464838	COSV104631107	38078
PTPN11	c.1649C>T	p.A550V	NA	LAPC4-CR	12	112939997	112939997	Missense_Mutation	SNP	C	30	22	8	T	monoallelic	NA	NA	NA	NA	NA
TBX3	c.438del	p.A147Pfs*6	NA	LAPC4-CR	12	115118903	115118903	Frameshift_Indel	DEL	T	20	11	9	-	monoallelic	NA	NA	NA	NA	NA
NCOR2	c.6886C>T	p.R2296W	NA	LAPC4-CR	12	124816883	124816883	Missense_Mutation	SNP	G	20	9	11	A	biallelic_hom	NA	NA	NA	NA	NA
NCOR2	c.5821C>T	p.R1941W	NA	LAPC4-CR	12	124821593	124821593	Missense_Mutation	SNP	G	34	11	23	A	biallelic_hom	NA	NA	NA	NA	NA
NCOR2	c.5509_5517dup	p.S1837_G1839dup	27	LAPC4-CR	12	124824721	124824722	Inframe_Indel	INS	-	44	3	41	GCCGCTGCT	biallelic_hom	https://cancer.sanger.ac.uk/cosmic/mutation/overview?id=45371441	COSM1359887	COSV62292510	41645
NCOR2	c.3178del	p.R1060Vfs*3	10	LAPC4-CR	12	124841251	124841251	Frameshift_Indel	DEL	G	28	19	9	-	biallelic_hom	https://cancer.sanger.ac.uk/cosmic/mutation/overview?id=45374186	COSM1359907	COSV62294228	38078
NCOR2	c.2956del	p.R986Gfs*77	2	LAPC4-CR	12	124846816	124846816	Frameshift_Indel	DEL	G	24	18	6	-	biallelic_hom	https://cancer.sanger.ac.uk/cosmic/mutation/overview?id=45372585	COSM4705995	COSV62299001	38078
NCOR2	c.2925dup	p.I976Hfs*8	2	LAPC4-CR	12	124848227	124848228	Frameshift_Indel	INS	-	24	18	6	G	biallelic_hom	https://cancer.sanger.ac.uk/cosmic/mutation/overview?id=45378715	COSM2227040	COSV62306702	38078
NCOR2	c.1526_1531dup	p.Q509_Q510dup	NA	LAPC4-CR	12	124887058	124887059	Inframe_Indel	INS	-	25	8	17	GCTGCT	biallelic_hom	NA	NA	NA	NA	NA
POLE	c.5900C>T	p.A1967V	NA	LAPC4-CR	12	133210876	133210876	Missense_Mutation	SNP	G	17	13	4	A	multi_monoallelic	NA	NA	NA	NA	NA
POLE	c.4647del	p.K1550Nfs*12	NA	LAPC4-CR	12	133219487	133219487	Frameshift_Indel	DEL	G	4	0	4	-	multi_monoallelic	NA	NA	NA	NA	NA
LATS2	c.1366A>G	p.T456A	NA	LAPC4-CR	13	21562553	21562553	Missense_Mutation	SNP	T	20	4	16	C	monoallelic	NA	NA	NA	NA	NA
BRCA2	c.7976+1G>A	p.X2659_splice	NA	LAPC4-CR	13	32936831	32936831	Splice_Site	SNP	G	19	10	9	A	monoallelic	NA	NA	NA	NA	NA
FOXA1	c.1077del	p.I360*	1	LAPC4-CR	14	38060912	38060912	Frameshift_Indel	DEL	G	28	12	16	-	biallelic_het	https://cancer.sanger.ac.uk/cosmic/mutation/overview?id=22492031	COSM5547496	COSV51646414	38078
FOXA1	c.680G>A	p.C227Y	2	LAPC4-CR	14	38061309	38061309	Missense_Mutation	SNP	C	35	19	16	T	biallelic_het	https://cancer.sanger.ac.uk/cosmic/mutation/overview?id=22489744	COSM6404397	COSV51643849	38078
ARID4A	c.2335del	p.T779Qfs*26	1	LAPC4-CR	14	58831137	58831137	Frameshift_Indel	DEL	A	3	0	3	-	monoallelic	https://cancer.sanger.ac.uk/cosmic/mutation/overview?id=33263013	COSM5078984	COSV62164369	38078
GPHN	c.955A>G	p.T319A	NA	LAPC4-CR	14	67432034	67432034	Missense_Mutation	SNP	A	20	13	7	G	monoallelic	NA	NA	NA	NA	NA
TSHR	c.1733T>C	p.L578P	NA	LAPC4-CR	14	81610135	81610135	Missense_Mutation	SNP	T	11	7	4	C	monoallelic	NA	NA	NA	NA	NA
BCL11B	c.698C>T	p.A233V	1	LAPC4-CR	14	99642475	99642475	Missense_Mutation	SNP	G	2	0	2	A	monoallelic	https://cancer.sanger.ac.uk/cosmic/mutation/overview?id=34497742	COSM3401577	COSV61740186	38078
AKT1	c.49G>A	p.E17K	701	LAPC4-CR	14	105246551	105246551	Missense_Mutation	SNP	C	21	6	15	T	monoallelic	https://cancer.sanger.ac.uk/cosmic/mutation/overview?id=84345696	COSM33765	COSV62571334	94230	breast/carcinoma/NS=61/3743=1.63%;bone/Overgrowth_syndrome/Proteus_syndrome=14/20=70%;thyroid/carcinoma/anaplastic_carcinoma=12/642=1.87%;meninges/meningioma/meningothelial=17/325=5.23%;NS/carcinoma/of_unknown_primary=4/209=1.91%;soft_tissue/desmoid_tumour-fibromatosis/NS=8/256=3.13%;breast/carcinoma/hormone_receptor-positive_carcinoma=9/328=2.74%;meninges/meningioma/transitional=5/259=1.93%;soft…
MGA	c.668T>C	p.V223A	NA	LAPC4-CR	15	41961760	41961760	Missense_Mutation	SNP	T	23	14	9	C	monoallelic	NA	NA	NA	NA	NA
MYO5A	c.3677G>A	p.R1226H	NA	LAPC4-CR	15	52643623	52643623	Missense_Mutation	SNP	C	26	18	8	T	multi_monoallelic	NA	NA	NA	NA	NA
MYO5A	c.1874G>A	p.G625D	NA	LAPC4-CR	15	52676398	52676398	Missense_Mutation	SNP	C	18	10	8	T	multi_monoallelic	NA	NA	NA	NA	NA
NTRK3	c.1488del	p.D499Tfs*7	NA	LAPC4-CR	15	88576185	88576185	Frameshift_Indel	DEL	G	16	6	10	-	monoallelic	NA	NA	NA	NA	NA
CRTC3	c.718C>T	p.R240C	2	LAPC4-CR	15	91162991	91162991	Missense_Mutation	SNP	C	24	14	10	T	monoallelic	https://cancer.sanger.ac.uk/cosmic/mutation/overview?id=22956542	COSM2140111	COSV51597434	38078
FES	c.2140G>A	p.A714T	1	LAPC4-CR	15	91436978	91436978	Missense_Mutation	SNP	G	25	18	7	A	monoallelic	https://cancer.sanger.ac.uk/cosmic/mutation/overview?id=30844089	COSM2140410	COSV60996979	2275
TSC2	c.1763A>G	p.E588G	NA	LAPC4-CR	16	2120503	2120503	Missense_Mutation	SNP	A	21	10	11	G	monoallelic	NA	NA	NA	NA	NA
TRAF7	c.81+1dup		NA	LAPC4-CR	16	2213999	2214000	Frameshift_Indel	INS	-	10	1	9	G	monoallelic	NA	NA	NA	NA	NA
GRIN2A	c.4021del	p.S1341Afs*56	NA	LAPC4-CR	16	9857380	9857380	Frameshift_Indel	DEL	T	34	8	26	-	monoallelic	NA	NA	NA	NA	NA
RMI2	c.310G>C	p.V104L	NA	LAPC4-CR	16	11444513	11444513	Missense_Mutation	SNP	G	23	6	17	C	monoallelic	NA	NA	NA	NA	NA
ERCC4	c.677A>G	p.Q226R	NA	LAPC4-CR	16	14021977	14021977	Missense_Mutation	SNP	A	22	16	6	G	monoallelic	NA	NA	NA	NA	NA
MYH11	c.5219G>A	p.R1740H	NA	LAPC4-CR	16	15812269	15812269	Missense_Mutation	SNP	C	40	27	13	T	multi_monoallelic	NA	NA	NA	NA	NA
MYH11	c.3551C>T	p.T1184M	NA	LAPC4-CR	16	15826542	15826542	Missense_Mutation	SNP	G	24	19	5	A	multi_monoallelic	NA	NA	NA	NA	NA
PALB2	c.1193T>C	p.V398A	NA	LAPC4-CR	16	23646674	23646674	Missense_Mutation	SNP	A	19	9	10	G	monoallelic	NA	NA	NA	NA	NA
IL21R	c.1159C>A	p.P387T	NA	LAPC4-CR	16	27460146	27460146	Missense_Mutation	SNP	C	31	20	11	A	monoallelic	NA	NA	NA	NA	NA
CDH1	c.44_46dup	p.L15dup	NA	LAPC4-CR	16	68771347	68771348	Inframe_Indel	INS	-	32	24	8	GCT	monoallelic	NA	NA	NA	NA	NA
ZFHX3	c.10810G>A	p.A3604T	1	LAPC4-CR	16	72821365	72821365	Missense_Mutation	SNP	C	23	8	15	T	biallelic_het	https://cancer.sanger.ac.uk/cosmic/mutation/overview?id=23053475	COSM1379694	COSV51738826	38078
ZFHX3	c.10579_10581del	p.G3527del	5	LAPC4-CR	16	72821594	72821596	Inframe_Indel	DEL	GCC	20	10	10	-	biallelic_het	https://cancer.sanger.ac.uk/cosmic/mutation/overview?id=23040462	COSM3276731	COSV51707637	38078
ZFHX3	c.9589del	p.Q3197Sfs*44	9	LAPC4-CR	16	72822586	72822586	Frameshift_Indel	DEL	G	31	12	19	-	biallelic_het	https://cancer.sanger.ac.uk/cosmic/mutation/overview?id=23038760	COSM5078997	COSV51713247	51932
ZFHX3	c.5774del	p.G1925Vfs*72	5	LAPC4-CR	16	72830807	72830807	Frameshift_Indel	DEL	C	20	4	16	-	biallelic_het	https://cancer.sanger.ac.uk/cosmic/mutation/overview?id=23034953	COSM3276851	COSV51710890	51932
ZFHX3	c.3229C>T	p.H1077Y	NA	LAPC4-CR	16	72923849	72923849	Missense_Mutation	SNP	G	24	18	6	A	biallelic_het	NA	NA	NA	NA	NA
ZFHX3	c.2287del	p.E763Sfs*61	25	LAPC4-CR	16	72991758	72991758	Frameshift_Indel	DEL	C	32	17	15	-	biallelic_het	https://cancer.sanger.ac.uk/cosmic/mutation/overview?id=23032075	COSM3276937	COSV51712561	51932	endometrium/carcinoma/endometrioid_carcinoma=7/637=1.1%
ZFHX3	c.1957C>T	p.R653C	2	LAPC4-CR	16	72992088	72992088	Missense_Mutation	SNP	G	40	23	17	A	biallelic_het	https://cancer.sanger.ac.uk/cosmic/mutation/overview?id=23036202	COSM4441663	COSV51716774	38078
MAF	c.493T>C	p.S165P	NA	LAPC4-CR	16	79633307	79633307	Missense_Mutation	SNP	A	17	4	13	G	monoallelic	NA	NA	NA	NA	NA
USP6	c.3752del	p.G1251Afs*14	1	LAPC4-CR	17	5074002	5074002	Frameshift_Indel	DEL	G	35	12	23	-	monoallelic	https://cancer.sanger.ac.uk/cosmic/mutation/overview?id=88163132	COSM6818958	COSV51476173	38078
TP53	c.532dup	p.H178Pfs*3	11	LAPC4-CR	17	7578397	7578398	Frameshift_Indel	INS	-	25	20	5	G	biallelic_het	https://cancer.sanger.ac.uk/cosmic/mutation/overview?id=23725352	COSM673518	COSV52756284	167988
TP53	c.524G>A	p.R175H	1870	LAPC4-CR	17	7578406	7578406	Missense_Mutation	SNP	C	24	5	19	T	biallelic_het	https://cancer.sanger.ac.uk/cosmic/mutation/overview?id=23639796	COSM10648	COSV52661038	167988	endometrium/carcinoma/endometrioid_carcinoma=17/1373=1.24%;central_nervous_system/glioma/astrocytoma=11/733=1.5%;ovary/carcinoma/NS=24/1948=1.23%;endometrium/carcinoma/mixed_serous_and_endometrioid_carcinoma=4/52=7.69%;ovary/carcinoma/endometrioid_carcinoma=6/185=3.24%;vulva/carcinoma/squamous_cell_carcinoma=9/231=3.9%;large_intestine/carcinoma/neuroendocrine_carcinoma=6/39=15.38%;salivary_gland/…
CHD3	c.1795del	p.R599Vfs*16	23	LAPC4-CR	17	7798765	7798765	Frameshift_Indel	DEL	C	33	13	20	-	monoallelic	https://cancer.sanger.ac.uk/cosmic/mutation/overview?id=41878473	COSM1387351	COSV57872218	38078
NCOR1	c.4045C>T	p.R1349C	2	LAPC4-CR	17	15974830	15974830	Missense_Mutation	SNP	G	21	9	12	A	multi_monoallelic	https://cancer.sanger.ac.uk/cosmic/mutation/overview?id=23207237	COSM9113138	COSV99249345	55372
NCOR1	c.1914del	p.G639Vfs*2	2	LAPC4-CR	17	16022738	16022738	Frameshift_Indel	DEL	T	21	13	8	-	multi_monoallelic	https://cancer.sanger.ac.uk/cosmic/mutation/overview?id=23209987	COSM6938544	COSV51981868	17294
NF1	c.2835dup	p.D946*	3	LAPC4-CR	17	29556462	29556463	Frameshift_Indel	INS	-	22	16	6	T	monoallelic	https://cancer.sanger.ac.uk/cosmic/mutation/overview?id=34062805	COSM1382073	COSV62194264	38078
LASP1	c.625G>A	p.A209T	NA	LAPC4-CR	17	37074870	37074870	Missense_Mutation	SNP	G	18	5	13	A	monoallelic	NA	NA	NA	NA	NA
CDK12	c.1213del	p.E405Kfs*31	NA	LAPC4-CR	17	37627297	37627297	Frameshift_Indel	DEL	G	5	2	3	-	biallelic_het	NA	NA	NA	NA	NA
CDK12	c.4382del	p.G1461Afs*38	14	LAPC4-CR	17	37687472	37687472	Frameshift_Indel	DEL	G	24	14	10	-	biallelic_het	https://cancer.sanger.ac.uk/cosmic/mutation/overview?id=55678303	COSM2837928	COSV70999178	56269
RARA	c.1109G>A	p.R370H	1	LAPC4-CR	17	38511611	38511611	Missense_Mutation	SNP	G	31	15	16	A	monoallelic	https://cancer.sanger.ac.uk/cosmic/mutation/overview?id=20081507	COSM2839081	COSV54190268	14917
STAT5B	c.1807G>T	p.A603S	NA	LAPC4-CR	17	40362288	40362288	Missense_Mutation	SNP	C	29	12	17	A	monoallelic	NA	NA	NA	NA	NA
STAT3	c.2186G>A	p.R729H	1	LAPC4-CR	17	40468878	40468878	Missense_Mutation	SNP	C	24	13	11	T	monoallelic	https://cancer.sanger.ac.uk/cosmic/mutation/overview?id=23810490	COSM3188671	COSV52886224	38078
ETV4	c.399del	p.R134Dfs*30	5	LAPC4-CR	17	41610701	41610701	Frameshift_Indel	DEL	G	45	32	13	-	monoallelic	https://cancer.sanger.ac.uk/cosmic/mutation/overview?id=28086705	COSM5181372	COSV60044247	38078
CDC27	c.2362C>T	p.R788C	NA	LAPC4-CR	17	45199858	45199858	Missense_Mutation	SNP	G	25	12	13	A	monoallelic	NA	NA	NA	NA	NA
COL1A1	c.3479G>A	p.G1160D	NA	LAPC4-CR	17	48264428	48264428	Missense_Mutation	SNP	C	35	23	12	T	monoallelic	NA	NA	NA	NA	NA
RNF43	c.1361G>A	p.R454H	NA	LAPC4-CR	17	56435776	56435776	Missense_Mutation	SNP	C	31	20	11	T	Noinfo	NA	NA	NA	NA	NA
RNF43	c.349del	p.R117Afs*41	46	LAPC4-CR	17	56448298	56448298	Frameshift_Indel	DEL	G	41	24	17	-	Noinfo	https://cancer.sanger.ac.uk/cosmic/mutation/overview?id=90511997	COSM1384762	COSV68456762	55535	stomach/carcinoma/adenocarcinoma=4/383=1.04%;large_intestine/adenoma/NS=11/86=12.79%
CLTC	c.3498G>T	p.E1166D	NA	LAPC4-CR	17	57759687	57759687	Missense_Mutation	SNP	G	27	11	16	T	monoallelic	NA	NA	NA	NA	NA
ZNF521	c.1651A>G	p.T551A	NA	LAPC4-CR	18	22806231	22806231	Missense_Mutation	SNP	T	21	10	11	C	multi_monoallelic	NA	NA	NA	NA	NA
ZNF521	c.521A>C	p.Y174S	NA	LAPC4-CR	18	22807361	22807361	Missense_Mutation	SNP	T	22	7	15	G	multi_monoallelic	NA	NA	NA	NA	NA
SETBP1	c.1923A>C	p.K641N	2	LAPC4-CR	18	42531228	42531228	Missense_Mutation	SNP	A	16	7	9	C	monoallelic	https://cancer.sanger.ac.uk/cosmic/mutation/overview?id=26126753	COSM4725129	COSV56319375	38078
MBD1	c.1165G>A	p.V389I	NA	LAPC4-CR	18	47800215	47800215	Missense_Mutation	SNP	C	30	10	20	T	monoallelic	NA	NA	NA	NA	NA
SMAD4	c.868C>T	p.H290Y	NA	LAPC4-CR	18	48584790	48584790	Missense_Mutation	SNP	C	17	4	13	T	monoallelic	NA	NA	NA	NA	NA
TCF3	c.1939G>A	p.A647T	NA	LAPC4-CR	19	1611732	1611732	Missense_Mutation	SNP	C	20	12	8	T	monoallelic	NA	NA	NA	NA	NA
COL5A3	c.3143del	p.P1048Lfs*96	NA	LAPC4-CR	19	10088132	10088132	Frameshift_Indel	DEL	G	26	20	6	-	monoallelic	NA	NA	NA	NA	NA
KEAP1	c.149G>A	p.R50H	NA	LAPC4-CR	19	10610561	10610561	Missense_Mutation	SNP	C	16	5	11	T	monoallelic	NA	NA	NA	NA	NA
DNAJB1	c.806G>A	p.C269Y	NA	LAPC4-CR	19	14626969	14626969	Missense_Mutation	SNP	C	23	14	9	T	monoallelic	NA	NA	NA	NA	NA
ELL	c.1807G>A	p.A603T	NA	LAPC4-CR	19	18555621	18555621	Missense_Mutation	SNP	C	11	5	6	T	monoallelic	NA	NA	NA	NA	NA
CEBPA	c.50G>A	p.S17N	NA	LAPC4-CR	19	33793271	33793271	Missense_Mutation	SNP	C	27	17	10	T	monoallelic	NA	NA	NA	NA	NA
CD79A	c.390del	p.R131Gfs*61	NA	LAPC4-CR	19	42383610	42383610	Frameshift_Indel	DEL	C	23	7	16	-	monoallelic	NA	NA	NA	NA	NA
ERF	c.896del	p.G299Efs*12	NA	LAPC4-CR	19	42753368	42753368	Frameshift_Indel	DEL	C	40	24	16	-	biallelic_het	NA	NA	NA	NA	NA
ERF	c.879del	p.S295Afs*16	NA	LAPC4-CR	19	42753385	42753385	Frameshift_Indel	DEL	C	35	7	28	-	biallelic_het	NA	NA	NA	NA	NA
CIC	c.1064G>A	p.G355D	NA	LAPC4-CR	19	42776999	42776999	Missense_Mutation	SNP	G	28	21	7	A	biallelic_het	NA	NA	NA	NA	NA
CIC	c.275C>T	p.A92V	NA	LAPC4-CR	19	42791215	42791215	Missense_Mutation	SNP	C	36	24	12	T	biallelic_het	NA	NA	NA	NA	NA
CIC	c.3347del	p.P1116Qfs*45	8	LAPC4-CR	19	42796883	42796883	Frameshift_Indel	DEL	C	34	16	18	-	biallelic_het	https://cancer.sanger.ac.uk/cosmic/mutation/overview?id=88868217	COSM3287149	COSV50566699	55179
CIC	c.3761A>G	p.E1254G	NA	LAPC4-CR	19	42797399	42797399	Missense_Mutation	SNP	A	23	15	8	G	biallelic_het	NA	NA	NA	NA	NA
CIC	c.3828G>A	p.W1276*	NA	LAPC4-CR	19	42797776	42797776	Nonsense_Mutation	SNP	G	31	17	14	A	biallelic_het	NA	NA	NA	NA	NA
CIC	c.4394G>A	p.R1465H	3	LAPC4-CR	19	42798822	42798822	Missense_Mutation	SNP	G	18	13	5	A	biallelic_het	https://cancer.sanger.ac.uk/cosmic/mutation/overview?id=88870909	COSM9112929	COSV99360490	55179
CBLC	c.338C>T	p.A113V	NA	LAPC4-CR	19	45281526	45281526	Missense_Mutation	SNP	C	24	16	8	T	multi_monoallelic	NA	NA	NA	NA	NA
CBLC	c.967G>A	p.G323S	NA	LAPC4-CR	19	45293310	45293310	Missense_Mutation	SNP	G	21	14	7	A	multi_monoallelic	NA	NA	NA	NA	NA
ERCC2	c.937G>A	p.E313K	1	LAPC4-CR	19	45867256	45867256	Missense_Mutation	SNP	C	49	39	10	T	monoallelic	https://cancer.sanger.ac.uk/cosmic/mutation/overview?id=41926276	COSM6970620	COSV55546102	15393
BAX	c.121del	p.E41Rfs*19	58	LAPC4-CR	19	49458971	49458971	Frameshift_Indel	DEL	G	14	2	12	-	biallelic_hom	https://cancer.sanger.ac.uk/cosmic/mutation/overview?id=20172093	COSM309434	COSV53168804	38078	biliary_tract/carcinoma/NS=4/266=1.5%;large_intestine/carcinoma/adenocarcinoma=41/2391=1.71%
POLD1	c.932G>A	p.R311H	NA	LAPC4-CR	19	50905960	50905960	Missense_Mutation	SNP	G	26	17	9	A	biallelic_het	NA	NA	NA	NA	NA
POLD1	c.3022C>T	p.R1008C	2	LAPC4-CR	19	50919935	50919935	Missense_Mutation	SNP	C	21	7	14	T	biallelic_het	https://cancer.sanger.ac.uk/cosmic/mutation/overview?id=53525103	COSM5172036	COSV54529893	52286
PPP2R1A	c.253T>C	p.Y85H	NA	LAPC4-CR	19	52709299	52709299	Missense_Mutation	SNP	T	16	8	8	C	monoallelic	NA	NA	NA	NA	NA
CNOT3	c.58G>A	p.E20K	13	LAPC4-CR	19	54646887	54646887	Missense_Mutation	SNP	G	32	15	17	A	monoallelic	https://cancer.sanger.ac.uk/cosmic/mutation/overview?id=47771955	COSM96799	COSV55360792	38078
ITSN2	c.2153G>A	p.R718Q	NA	LAPC4-CR	2	24494739	24494739	Missense_Mutation	SNP	C	23	17	6	T	monoallelic	NA	NA	NA	NA	NA
DNMT3A	c.1307A>G	p.Y436C	1	LAPC4-CR	2	25469151	25469151	Missense_Mutation	SNP	T	18	15	3	C	monoallelic	https://cancer.sanger.ac.uk/cosmic/mutation/overview?id=23916219	COSM4093268	COSV53053441	38078
STRN	c.1946G>A	p.R649H	NA	LAPC4-CR	2	37082387	37082387	Missense_Mutation	SNP	C	18	12	6	T	monoallelic	NA	NA	NA	NA	NA
EPAS1	c.1972C>T	p.R658C	NA	LAPC4-CR	2	46607783	46607783	Missense_Mutation	SNP	C	21	13	8	T	monoallelic	NA	NA	NA	NA	NA
MSH2	c.899T>G	p.M300R	NA	LAPC4-CR	2	47641514	47641514	Missense_Mutation	SNP	T	18	14	4	G	monoallelic	NA	NA	NA	NA	NA
MSH6	c.3261dup	p.F1088Lfs*5	NA	LAPC4-CR	2	48030639	48030640	Frameshift_Indel	INS	-	23	13	10	C	monoallelic	NA	NA	NA	NA	NA
BCL11A	c.2006T>C	p.L669P	NA	LAPC4-CR	2	60688041	60688041	Missense_Mutation	SNP	A	23	5	18	G	multi_monoallelic	NA	NA	NA	NA	NA
BCL11A	c.1510_1512del	p.E504del	NA	LAPC4-CR	2	60688535	60688537	Inframe_Indel	DEL	CTC	19	7	12	-	multi_monoallelic	NA	NA	NA	NA	NA
DCTN1	c.2780G>A	p.R927Q	NA	LAPC4-CR	2	74593126	74593126	Missense_Mutation	SNP	C	44	12	32	T	monoallelic	NA	NA	NA	NA	NA
ERCC3	c.1925G>A	p.R642Q	1	LAPC4-CR	2	128028932	128028932	Missense_Mutation	SNP	C	27	6	21	T	multi_monoallelic	https://cancer.sanger.ac.uk/cosmic/mutation/overview?id=20348025	COSM9169223	COSV99573788	38078
ERCC3	c.777A>T	p.E259D	6	LAPC4-CR	2	128046958	128046958	Missense_Mutation	SNP	T	24	7	17	A	multi_monoallelic	https://cancer.sanger.ac.uk/cosmic/mutation/overview?id=20347310	COSM6961143	COSV53425973	52854
CXCR4	c.490G>A	p.V164I	4	LAPC4-CR	2	136873020	136873020	Missense_Mutation	SNP	C	29	7	22	T	monoallelic	https://cancer.sanger.ac.uk/cosmic/mutation/overview?id=46739079	COSM5950644	COSV54011460	53372
LRP1B	c.12188G>A	p.R4063K	NA	LAPC4-CR	2	141092057	141092057	Missense_Mutation	SNP	C	21	13	8	T	monoallelic	NA	NA	NA	NA	NA
ACVR2A	c.1310del	p.K437Rfs*5	NA	LAPC4-CR	2	148683686	148683686	Frameshift_Indel	DEL	A	19	1	18	-	biallelic_hom	NA	NA	NA	NA	NA
PTPRT	c.3224del	p.P1075Rfs*6	NA	LAPC4-CR	20	40739003	40739003	Frameshift_Indel	DEL	G	36	21	15	-	biallelic_het	NA	NA	NA	NA	NA
PTPRT	c.82G>A	p.A28T	NA	LAPC4-CR	20	41818292	41818292	Missense_Mutation	SNP	C	37	20	17	T	biallelic_het	NA	NA	NA	NA	NA
MATN4	c.1600A>T	p.T534S	NA	LAPC4-CR	20	43922635	43922635	Missense_Mutation	SNP	T	25	16	9	A	monoallelic	NA	NA	NA	NA	NA
NFATC2	c.2543dup	p.V849Gfs*35	NA	LAPC4-CR	20	50048782	50048783	Frameshift_Indel	INS	-	35	22	13	G	biallelic_het	NA	NA	NA	NA	NA
NFATC2	c.1547C>T	p.A516V	2	LAPC4-CR	20	50090678	50090678	Missense_Mutation	SNP	G	44	23	21	A	biallelic_het	https://cancer.sanger.ac.uk/cosmic/mutation/overview?id=43187607	COSM4099404	COSV65354277	38078
NFATC2	c.378del	p.L128Sfs*3	1	LAPC4-CR	20	50140402	50140402	Frameshift_Indel	DEL	C	35	18	17	-	biallelic_het	https://cancer.sanger.ac.uk/cosmic/mutation/overview?id=43192070	COSM6725289	COSV65353935	38078
PTK6	c.349T>C	p.S117P	NA	LAPC4-CR	20	62166294	62166294	Missense_Mutation	SNP	A	34	18	16	G	monoallelic	NA	NA	NA	NA	NA
ITSN1	c.2392G>A	p.A798T	NA	LAPC4-CR	21	35183351	35183351	Missense_Mutation	SNP	G	32	10	22	A	monoallelic	NA	NA	NA	NA	NA
BCR	c.2951C>T	p.T984M	NA	LAPC4-CR	22	23637281	23637281	Missense_Mutation	SNP	C	24	8	16	T	biallelic_het	NA	NA	NA	NA	NA
BCR	c.3245G>A	p.G1082D	NA	LAPC4-CR	22	23653946	23653946	Missense_Mutation	SNP	G	18	2	16	A	biallelic_het	NA	NA	NA	NA	NA
MN1	c.1596_1598dup	p.Q550dup	NA	LAPC4-CR	22	28194933	28194934	Inframe_Indel	INS	-	7	2	5	TGC	monoallelic	NA	NA	NA	NA	NA
MYH9	c.5516G>A	p.R1839Q	NA	LAPC4-CR	22	36680525	36680525	Missense_Mutation	SNP	C	28	22	6	T	monoallelic	NA	NA	NA	NA	NA
EP300	c.1244T>C	p.L415P	NA	LAPC4-CR	22	41525969	41525969	Missense_Mutation	SNP	T	25	5	20	C	monoallelic	NA	NA	NA	NA	NA
BRPF1	c.2812del	p.Q938Sfs*5	NA	LAPC4-CR	3	9786078	9786078	Frameshift_Indel	DEL	C	28	12	16	-	monoallelic	NA	NA	NA	NA	NA
FANCD2	c.3242del	p.P1081Lfs*18	NA	LAPC4-CR	3	10127512	10127512	Frameshift_Indel	DEL	C	21	14	7	-	monoallelic	NA	NA	NA	NA	NA
RAF1	c.488T>C	p.F163S	NA	LAPC4-CR	3	12650358	12650358	Missense_Mutation	SNP	A	16	10	6	G	monoallelic	NA	NA	NA	NA	NA
PBRM1	c.4230dup	p.P1411Afs*98	NA	LAPC4-CR	3	52588797	52588798	Frameshift_Indel	INS	-	23	13	10	C	monoallelic	NA	NA	NA	NA	NA
CACNA1D	c.599T>C	p.L200P	NA	LAPC4-CR	3	53684921	53684921	Missense_Mutation	SNP	T	18	11	7	C	biallelic_het	NA	NA	NA	NA	NA
CACNA1D	c.1706A>T	p.D569V	NA	LAPC4-CR	3	53756481	53756481	Missense_Mutation	SNP	A	19	15	4	T	biallelic_het	NA	NA	NA	NA	NA
CACNA1D	c.5413C>A	p.H1805N	NA	LAPC4-CR	3	53835397	53835397	Missense_Mutation	SNP	C	17	11	6	A	biallelic_het	NA	NA	NA	NA	NA
FOXP1	c.334T>C	p.S112P	NA	LAPC4-CR	3	71247066	71247066	Missense_Mutation	SNP	A	17	0	17	G	biallelic_hom	NA	NA	NA	NA	NA
FOXP1	c.86G>A	p.C29Y	NA	LAPC4-CR	3	71247447	71247447	Missense_Mutation	SNP	C	13	9	4	T	biallelic_hom	NA	NA	NA	NA	NA
POLQ	c.5390G>T	p.S1797I	NA	LAPC4-CR	3	121206388	121206388	Missense_Mutation	SNP	C	23	4	19	A	monoallelic	NA	NA	NA	NA	NA
RPN1	c.1541G>C	p.S514T	NA	LAPC4-CR	3	128341107	128341107	Missense_Mutation	SNP	C	13	10	3	G	monoallelic	NA	NA	NA	NA	NA
ATR	c.5851C>T	p.R1951*	NA	LAPC4-CR	3	142215250	142215250	Nonsense_Mutation	SNP	G	20	14	6	A	multi_monoallelic	NA	NA	NA	NA	NA
ATR	c.2921C>T	p.T974M	NA	LAPC4-CR	3	142269029	142269029	Missense_Mutation	SNP	G	30	21	9	A	multi_monoallelic	NA	NA	NA	NA	NA
FGFR3	c.1144G>A	p.G382R	NA	LAPC4-CR	4	1806119	1806119	Missense_Mutation	SNP	G	38	30	8	A	monoallelic	NA	NA	NA	NA	NA
PHOX2B	c.478G>A	p.A160T	NA	LAPC4-CR	4	41748291	41748291	Missense_Mutation	SNP	C	22	14	8	T	monoallelic	NA	NA	NA	NA	NA
KDR	c.1532dup	p.N511Kfs*21	NA	LAPC4-CR	4	55972857	55972858	Frameshift_Indel	INS	-	14	9	5	T	monoallelic	NA	NA	NA	NA	NA
RAP1GDS1	c.1293A>G	p.I431M	NA	LAPC4-CR	4	99341285	99341285	Missense_Mutation	SNP	A	19	14	5	G	monoallelic	NA	NA	NA	NA	NA
TET2	c.737C>T	p.T246I	NA	LAPC4-CR	4	106155836	106155836	Missense_Mutation	SNP	C	27	9	18	T	multi_monoallelic	NA	NA	NA	NA	NA
TET2	c.4354C>T	p.R1452*	20	LAPC4-CR	4	106193892	106193892	Nonsense_Mutation	SNP	C	23	10	13	T	multi_monoallelic	https://cancer.sanger.ac.uk/cosmic/mutation/overview?id=80174756	COSM41706	COSV54398405	75679
FAT4	c.2335G>A	p.V779I	NA	LAPC4-CR	4	126239901	126239901	Missense_Mutation	SNP	G	24	18	6	A	monoallelic	NA	NA	NA	NA	NA
TERT	c.336del	p.E113Rfs*15	5	LAPC4-CR	5	1294665	1294665	Frameshift_Indel	DEL	G	32	18	14	-	monoallelic	https://cancer.sanger.ac.uk/cosmic/mutation/overview?id=28084595	COSM4733117	COSV57215630	97493
IL7R	c.799del	p.R267Gfs*28	11	LAPC4-CR	5	35874637	35874637	Frameshift_Indel	DEL	A	39	22	17	-	monoallelic	https://cancer.sanger.ac.uk/cosmic/mutation/overview?id=24807449	COSM1132948	COSV57406620	57480
MAP3K1	c.1852G>A	p.A618T	NA	LAPC4-CR	5	56171024	56171024	Missense_Mutation	SNP	G	39	14	25	A	monoallelic	NA	NA	NA	NA	NA
CHD1	c.1913G>A	p.R638H	NA	LAPC4-CR	5	98229198	98229198	Missense_Mutation	SNP	C	12	2	10	T	monoallelic	NA	NA	NA	NA	NA
AFF4	c.1695dup	p.Q566Tfs*6	4	LAPC4-CR	5	132232626	132232627	Frameshift_Indel	INS	-	21	8	13	T	multi_monoallelic	https://cancer.sanger.ac.uk/cosmic/mutation/overview?id=20093948	COSM3729930	COSV54794294	38078
AFF4	c.1416G>A	p.W472*	1	LAPC4-CR	5	132232906	132232906	Nonsense_Mutation	SNP	C	40	16	24	T	multi_monoallelic	https://cancer.sanger.ac.uk/cosmic/mutation/overview?id=20093755	COSM6595930	COSV54795191	38078
PDGFRB	c.1001G>A	p.R334Q	NA	LAPC4-CR	5	149512439	149512439	Missense_Mutation	SNP	C	14	3	11	T	multi_monoallelic	NA	NA	NA	NA	NA
PDGFRB	c.181G>T	p.V61L	NA	LAPC4-CR	5	149515301	149515301	Missense_Mutation	SNP	C	38	11	27	A	multi_monoallelic	NA	NA	NA	NA	NA
NSD1	c.2474C>A	p.A825D	1	LAPC4-CR	5	176637874	176637874	Missense_Mutation	SNP	C	22	17	5	A	multi_monoallelic	https://cancer.sanger.ac.uk/cosmic/mutation/overview?id=54160291	COSM6005682	COSV61771821	16623
NSD1	c.4923A>G	p.I1641M	NA	LAPC4-CR	5	176684109	176684109	Missense_Mutation	SNP	A	21	17	4	G	multi_monoallelic	NA	NA	NA	NA	NA
FLT4	c.3640G>T	p.A1214S	NA	LAPC4-CR	5	180038377	180038377	Missense_Mutation	SNP	C	29	10	19	A	multi_monoallelic	NA	NA	NA	NA	NA
FLT4	c.1684T>C	p.S562P	NA	LAPC4-CR	5	180048878	180048878	Missense_Mutation	SNP	A	13	3	10	G	multi_monoallelic	NA	NA	NA	NA	NA
HIST1H3B	c.365C>A	p.P122H	NA	LAPC4-CR	6	26031924	26031924	Missense_Mutation	SNP	G	12	8	4	T	monoallelic	NA	NA	NA	NA	NA
ZNF292	c.3254G>A	p.G1085E	NA	LAPC4-CR	6	87966601	87966601	Missense_Mutation	SNP	G	15	4	11	A	monoallelic	NA	NA	NA	NA	NA
ROS1	c.1313T>C	p.V438A	1	LAPC4-CR	6	117710959	117710959	Missense_Mutation	SNP	A	13	4	9	G	monoallelic	https://cancer.sanger.ac.uk/cosmic/mutation/overview?id=36975464	COSM6005716	COSV63852242	16088
RSPO3	c.449T>C	p.V150A	NA	LAPC4-CR	6	127476398	127476398	Missense_Mutation	SNP	T	31	20	11	C	monoallelic	NA	NA	NA	NA	NA
TNFAIP3	c.1368del	p.P457Lfs*20	9	LAPC4-CR	6	138199945	138199945	Frameshift_Indel	DEL	G	15	3	12	-	monoallelic	https://cancer.sanger.ac.uk/cosmic/mutation/overview?id=23849672	COSM303678	COSV52797271	57921
LATS1	c.888G>A	p.W296*	NA	LAPC4-CR	6	150005337	150005337	Nonsense_Mutation	SNP	C	10	7	3	T	monoallelic	NA	NA	NA	NA	NA
NOX3	c.253A>G	p.I85V	NA	LAPC4-CR	6	155775947	155775947	Missense_Mutation	SNP	T	27	9	18	C	monoallelic	NA	NA	NA	NA	NA
ARID1B	c.4894+21_4894+22insGAATGAAAGCTTTGGAATTCTTACCGATATCTTTGGAGGTAAGAATTCCAAAGCTTTCA		NA	LAPC4-CR	6	157522621	157522622	Frameshift_Indel	INS	-	8	6	2	GGTAAGAATTCCAAAGCTTTCAGAATGAAAGCTTTGGAATTCTTACCGATATCTTTGGA	monoallelic	NA	NA	NA	NA	NA
IGF2R	c.1217C>T	p.S406L	1	LAPC4-CR	6	160455456	160455456	Missense_Mutation	SNP	C	25	3	22	T	biallelic_het	https://cancer.sanger.ac.uk/cosmic/mutation/overview?id=33698840	COSM5436024	COSV63630868	38078
IGF2R	c.1882A>G	p.T628A	NA	LAPC4-CR	6	160466893	160466893	Missense_Mutation	SNP	A	30	13	17	G	biallelic_het	NA	NA	NA	NA	NA
IGF2R	c.2330A>G	p.Q777R	NA	LAPC4-CR	6	160468924	160468924	Missense_Mutation	SNP	A	42	27	15	G	biallelic_het	NA	NA	NA	NA	NA
IGF2R	c.3328G>A	p.D1110N	NA	LAPC4-CR	6	160482600	160482600	Missense_Mutation	SNP	G	20	15	5	A	biallelic_het	NA	NA	NA	NA	NA
FGFR1OP	c.650T>C	p.L217P	NA	LAPC4-CR	6	167435967	167435967	Missense_Mutation	SNP	T	42	31	11	C	monoallelic	NA	NA	NA	NA	NA
HOXA11	c.887A>G	p.E296G	NA	LAPC4-CR	7	27222470	27222470	Missense_Mutation	SNP	T	30	7	23	C	monoallelic	NA	NA	NA	NA	NA
EGFR	c.2939T>A	p.V980D	1	LAPC4-CR	7	55268099	55268099	Missense_Mutation	SNP	T	23	5	18	A	monoallelic	https://cancer.sanger.ac.uk/cosmic/mutation/overview?id=23273451	COSM6005629	COSV51777967	153076
HIP1	c.850C>T	p.R284W	1	LAPC4-CR	7	75192521	75192521	Missense_Mutation	SNP	G	28	20	8	A	monoallelic	https://cancer.sanger.ac.uk/cosmic/mutation/overview?id=28390927	COSM220284	COSV61183100	38078
SAMD9	c.1847G>A	p.G616D	NA	LAPC4-CR	7	92733564	92733564	Missense_Mutation	SNP	C	21	10	11	T	monoallelic	NA	NA	NA	NA	NA
TRRAP	c.1181A>G	p.D394G	NA	LAPC4-CR	7	98506416	98506416	Missense_Mutation	SNP	A	39	26	13	G	biallelic_het	NA	NA	NA	NA	NA
TRRAP	c.3261G>T	p.M1087I	NA	LAPC4-CR	7	98527697	98527697	Missense_Mutation	SNP	G	29	20	9	T	biallelic_het	NA	NA	NA	NA	NA
TRRAP	c.6077C>T	p.P2026L	2	LAPC4-CR	7	98554023	98554023	Missense_Mutation	SNP	C	25	20	5	T	biallelic_het	https://cancer.sanger.ac.uk/cosmic/mutation/overview?id=32057217	COSM238563	COSV62846705	38078
TRRAP	c.9520C>T	p.H3174Y	1	LAPC4-CR	7	98586506	98586506	Missense_Mutation	SNP	C	31	11	20	T	biallelic_het	https://cancer.sanger.ac.uk/cosmic/mutation/overview?id=32059587	COSM6308786	COSV62844245	38078
TRRAP	c.10964C>T	p.A3655V	NA	LAPC4-CR	7	98608742	98608742	Missense_Mutation	SNP	C	26	10	16	T	biallelic_het	NA	NA	NA	NA	NA
CUX1	c.2764del	p.L922Cfs*20	5	LAPC4-CR	7	101845304	101845304	Frameshift_Indel	DEL	C	45	29	16	-	biallelic_het	https://cancer.sanger.ac.uk/cosmic/mutation/overview?id=33289451	COSM169209	COSV52890667	38078
CUX1	c.3866C>T	p.A1289V	NA	LAPC4-CR	7	101882810	101882810	Missense_Mutation	SNP	C	34	18	16	T	biallelic_het	NA	NA	NA	NA	NA
CUX1	c.4510A>G	p.K1504E	NA	LAPC4-CR	7	101892281	101892281	Missense_Mutation	SNP	A	25	13	12	G	biallelic_het	NA	NA	NA	NA	NA
MET	c.3902C>G	p.P1301R	NA	LAPC4-CR	7	116435758	116435758	Missense_Mutation	SNP	C	42	10	32	G	monoallelic	NA	NA	NA	NA	NA
SND1	c.1498C>T	p.P500S	NA	LAPC4-CR	7	127544843	127544843	Missense_Mutation	SNP	C	30	23	7	T	monoallelic	NA	NA	NA	NA	NA
KMT2C	c.10519C>T	p.R3507*	8	LAPC4-CR	7	151860143	151860143	Nonsense_Mutation	SNP	G	30	12	18	A	biallelic_het	https://cancer.sanger.ac.uk/cosmic/mutation/overview?id=22725772	COSM5630942	COSV51418777	63101
KMT2C	c.10441C>A	p.Q3481K	NA	LAPC4-CR	7	151860221	151860221	Missense_Mutation	SNP	G	37	11	26	T	biallelic_het	NA	NA	NA	NA	NA
KMT2C	c.8902G>A	p.A2968T	NA	LAPC4-CR	7	151873636	151873636	Missense_Mutation	SNP	C	50	17	33	T	biallelic_het	NA	NA	NA	NA	NA
KMT2C	c.5687A>G	p.D1896G	NA	LAPC4-CR	7	151879258	151879258	Missense_Mutation	SNP	T	23	13	10	C	biallelic_het	NA	NA	NA	NA	NA
KMT2C	c.4628del	p.P1543Hfs*20	1	LAPC4-CR	7	151891126	151891126	Frameshift_Indel	DEL	G	21	15	6	-	biallelic_het	https://cancer.sanger.ac.uk/cosmic/mutation/overview?id=22767023	COSM6961766	COSV51506987	25023
KMT2C	c.3233G>A	p.C1078Y	NA	LAPC4-CR	7	151921190	151921190	Missense_Mutation	SNP	C	22	8	14	T	biallelic_het	NA	NA	NA	NA	NA
PCM1	c.4409A>T	p.D1470V	NA	LAPC4-CR	8	17843595	17843595	Missense_Mutation	SNP	A	52	33	19	T	monoallelic	NA	NA	NA	NA	NA
WRN	c.15del	p.K5Nfs*15	NA	LAPC4-CR	8	30915971	30915971	Frameshift_Indel	DEL	A	36	17	19	-	biallelic_het	NA	NA	NA	NA	NA
WRN	c.3382del	p.S1128Vfs*34	NA	LAPC4-CR	8	31001132	31001132	Frameshift_Indel	DEL	A	36	22	14	-	biallelic_het	NA	NA	NA	NA	NA
CHD7	c.3919C>G	p.H1307D	NA	LAPC4-CR	8	61748772	61748772	Missense_Mutation	SNP	C	43	13	30	G	monoallelic	NA	NA	NA	NA	NA
PREX2	c.3470A>C	p.K1157T	2	LAPC4-CR	8	69031715	69031715	Missense_Mutation	SNP	A	22	7	15	C	monoallelic	https://cancer.sanger.ac.uk/cosmic/mutation/overview?id=25490255	COSM7449581	COSV99908973	40562
UBR5	c.7915G>A	p.A2639T	NA	LAPC4-CR	8	103273415	103273415	Missense_Mutation	SNP	C	30	19	11	T	monoallelic	NA	NA	NA	NA	NA
RECQL4	c.2296del	p.X766_splice	NA	LAPC4-CR	8	145738768	145738768	Splice_Site	DEL	G	41	0	41	-	biallelic_hom	NA	NA	NA	NA	NA
RECQL4	c.374G>A	p.R125H	NA	LAPC4-CR	8	145742129	145742129	Missense_Mutation	SNP	C	29	2	27	T	biallelic_hom	NA	NA	NA	NA	NA
JAK2	c.701G>A	p.R234H	NA	LAPC4-CR	9	5054649	5054649	Missense_Mutation	SNP	G	25	16	9	A	biallelic_het	NA	NA	NA	NA	NA
JAK2	c.739G>T	p.A247S	NA	LAPC4-CR	9	5054687	5054687	Missense_Mutation	SNP	G	25	11	14	T	biallelic_het	NA	NA	NA	NA	NA
TAF1L	c.3626T>C	p.V1209A	NA	LAPC4-CR	9	32631952	32631952	Missense_Mutation	SNP	A	14	7	7	G	monoallelic	NA	NA	NA	NA	NA
SYK	c.496dup	p.M166Nfs*14	NA	LAPC4-CR	9	93607788	93607789	Frameshift_Indel	INS	-	23	13	10	A	biallelic_het	NA	NA	NA	NA	NA
SYK	c.707C>T	p.T236M	NA	LAPC4-CR	9	93624616	93624616	Missense_Mutation	SNP	C	16	8	8	T	biallelic_het	NA	NA	NA	NA	NA
CNTRL	c.6398A>G	p.Y2133C	NA	LAPC4-CR	9	123933807	123933807	Missense_Mutation	SNP	A	31	19	12	G	monoallelic	NA	NA	NA	NA	NA
ABL1	c.2690A>G	p.H897R	NA	LAPC4-CR	9	133760310	133760310	Missense_Mutation	SNP	A	18	11	7	G	monoallelic	NA	NA	NA	NA	NA
NUP214	c.1255C>T	p.R419*	NA	LAPC4-CR	9	134016058	134016058	Nonsense_Mutation	SNP	C	19	13	6	T	monoallelic	NA	NA	NA	NA	NA
BRD3	c.413C>T	p.A138V	NA	LAPC4-CR	9	136916770	136916770	Missense_Mutation	SNP	G	11	3	8	A	monoallelic	NA	NA	NA	NA	NA
COL5A1	c.2167C>T	p.Q723*	NA	LAPC4-CR	9	137658879	137658879	Nonsense_Mutation	SNP	C	16	5	11	T	multi_monoallelic	NA	NA	NA	NA	NA
COL5A1	c.4050del	p.G1351Efs*137	NA	LAPC4-CR	9	137707451	137707451	Frameshift_Indel	DEL	C	15	8	7	-	multi_monoallelic	NA	NA	NA	NA	NA
NOTCH1	c.3829G>A	p.D1277N	NA	LAPC4-CR	9	139401240	139401240	Missense_Mutation	SNP	C	22	9	13	T	multi_monoallelic	NA	NA	NA	NA	NA
NOTCH1	c.635G>A	p.G212D	NA	LAPC4-CR	9	139417409	139417409	Missense_Mutation	SNP	C	14	6	8	T	multi_monoallelic	NA	NA	NA	NA	NA
DDX3X	n.3041-2A>T		NA	LAPC4-CR	X	41217084	41217084	Splice_Site	SNP	A	3	0	3	T	biallelic_hom	NA	NA	NA	NA	NA
RBM10	c.1234T>C	p.W412R	NA	LAPC4-CR	X	47039891	47039891	Missense_Mutation	SNP	T	4	0	4	C	biallelic_hom	NA	NA	NA	NA	NA
TFE3	c.1445del	p.G482Dfs*44	NA	LAPC4-CR	X	48887952	48887952	Frameshift_Indel	DEL	C	5	0	5	-	biallelic_hom	NA	NA	NA	NA	NA
AR	c.237_239dup	p.Q80dup	14	LAPC4-CR	X	66765158	66765159	Inframe_Indel	INS	-	3	0	3	GCA	biallelic_hom	https://cancer.sanger.ac.uk/cosmic/mutation/overview?id=38852311	COSM4603337	COSV65952534	58047
AR	c.1418_1420dup	p.G473dup	2	LAPC4-CR	X	66766356	66766357	Inframe_Indel	INS	-	3	1	2	GGC	biallelic_hom	https://cancer.sanger.ac.uk/cosmic/mutation/overview?id=38859937	COSM9498457	COSV104687717	38078
AR	c.2180G>A	p.R727H	3	LAPC4-CR	X	66937326	66937326	Missense_Mutation	SNP	G	4	0	4	A	biallelic_hom	https://cancer.sanger.ac.uk/cosmic/mutation/overview?id=38863496	COSM6944526	COSV65958005	19969
ZMYM3	c.143del	p.P48Lfs*65	NA	LAPC4-CR	X	70472963	70472963	Frameshift_Indel	DEL	G	14	1	13	-	biallelic_hom	NA	NA	NA	NA	NA
SMARCA1	c.2128del	p.M710Wfs*6	2	LAPC4-CR	X	128621084	128621084	Frameshift_Indel	DEL	T	13	7	6	-	biallelic_hom	https://cancer.sanger.ac.uk/cosmic/mutation/overview?id=35793994	COSM253100	COSV64412250	38078
SMARCA1	c.565C>T	p.R189*	NA	LAPC4-CR	X	128649729	128649729	Nonsense_Mutation	SNP	G	16	0	16	A	biallelic_hom	NA	NA	NA	NA	NA
CAMTA1	c.2539C>T	p.H847Y	NA	LAPC4	1	7725146	7725146	Missense_Mutation	SNP	C	34	10	24	T	biallelic_het	NA	NA	NA	NA	NA
CAMTA1	c.4767del	p.K1589Nfs*33	11	LAPC4	1	7811329	7811329	Frameshift_Indel	DEL	A	48	38	10	-	biallelic_het	https://cancer.sanger.ac.uk/cosmic/mutation/overview?id=25208976	COSM309839	COSV57887770	38078	NS/malignant_melanoma/NS=6/101=5.94%
MTOR	c.6053G>A	p.R2018Q	NA	LAPC4	1	11187844	11187844	Missense_Mutation	SNP	C	28	19	9	T	biallelic_het	NA	NA	NA	NA	NA
MTOR	c.4555G>A	p.A1519T	NA	LAPC4	1	11210198	11210198	Missense_Mutation	SNP	C	26	6	20	T	biallelic_het	NA	NA	NA	NA	NA
SPEN	c.4994C>T	p.A1665V	NA	LAPC4	1	16257729	16257729	Missense_Mutation	SNP	C	22	13	9	T	monoallelic	NA	NA	NA	NA	NA
ARID1A	c.6419_6420dup	p.F2141Pfs*60	NA	LAPC4	1	27106803	27106804	Frameshift_Indel	INS	-	35	7	28	CC	monoallelic	NA	NA	NA	NA	NA
SFPQ	c.1532del	p.N511Tfs*2	NA	LAPC4	1	35654867	35654867	Frameshift_Indel	DEL	T	24	17	7	-	monoallelic	NA	NA	NA	NA	NA
CSF3R	c.1822del	p.A608Pfs*9	NA	LAPC4	1	36933465	36933465	Frameshift_Indel	DEL	C	35	25	10	-	multi_monoallelic	NA	NA	NA	NA	NA
CSF3R	c.1503G>C	p.E501D	NA	LAPC4	1	36934830	36934830	Missense_Mutation	SNP	C	36	23	13	G	multi_monoallelic	NA	NA	NA	NA	NA
MUTYH	c.1411C>T	p.R471C	2	LAPC4	1	45796910	45796910	Missense_Mutation	SNP	G	28	11	17	A	monoallelic	https://cancer.sanger.ac.uk/cosmic/mutation/overview?id=35641343	COSM162695	COSV58343650	53682
CDKN2C	c.18del	p.N7Tfs*12	NA	LAPC4	1	51436054	51436054	Frameshift_Indel	DEL	G	24	7	17	-	monoallelic	NA	NA	NA	NA	NA
EPS15	c.2432G>A	p.G811D	1	LAPC4	1	51826955	51826955	Missense_Mutation	SNP	C	34	11	23	T	monoallelic	https://cancer.sanger.ac.uk/cosmic/mutation/overview?id=37753325	COSM6005643	COSV65540717	916
JAK1	c.3322T>G	p.L1108V	1	LAPC4	1	65301126	65301126	Missense_Mutation	SNP	A	50	13	37	C	biallelic_het	https://cancer.sanger.ac.uk/cosmic/mutation/overview?id=29882254	COSM6005665	COSV53805331	27195
JAK1	c.3071del	p.L1024*	NA	LAPC4	1	65303684	65303684	Frameshift_Indel	DEL	A	52	39	13	-	biallelic_het	NA	NA	NA	NA	NA
JAK1	c.1289del	p.P430Rfs*2	22	LAPC4	1	65325833	65325833	Frameshift_Indel	DEL	G	33	13	20	-	biallelic_het	https://cancer.sanger.ac.uk/cosmic/mutation/overview?id=29880709	COSM1560531	COSV61087940	65273
JAK1	c.355A>T	p.T119S	NA	LAPC4	1	65339181	65339181	Missense_Mutation	SNP	T	41	10	31	A	biallelic_het	NA	NA	NA	NA	NA
BCL10	c.499del	p.S167Lfs*6	NA	LAPC4	1	85733513	85733513	Frameshift_Indel	DEL	A	30	10	20	-	monoallelic	NA	NA	NA	NA	NA
TRIM33	c.3133_3135del	p.V1045del	NA	LAPC4	1	114940598	114940600	Inframe_Indel	DEL	AAC	33	8	25	-	monoallelic	NA	NA	NA	NA	NA
ATP1A1	c.1440A>G	p.I480M	NA	LAPC4	1	116935583	116935583	Missense_Mutation	SNP	A	49	16	33	G	monoallelic	NA	NA	NA	NA	NA
NOTCH2	c.629C>T	p.P210L	NA	LAPC4	1	120539742	120539742	Missense_Mutation	SNP	G	95	77	18	A	multi_monoallelic	NA	NA	NA	NA	NA
NOTCH2	c.316T>C	p.S106P	NA	LAPC4	1	120548051	120548051	Missense_Mutation	SNP	A	124	93	31	G	multi_monoallelic	NA	NA	NA	NA	NA
BCL9	c.1547dup	p.P517Sfs*7	19	LAPC4	1	147091500	147091501	Frameshift_Indel	INS	-	57	40	17	C	multi_monoallelic	https://cancer.sanger.ac.uk/cosmic/mutation/overview?id=23519573	COSM50227	COSV52340491	39752
BCL9	c.2912del	p.P971Hfs*11	4	LAPC4	1	147094076	147094076	Frameshift_Indel	DEL	C	58	41	17	-	multi_monoallelic	https://cancer.sanger.ac.uk/cosmic/mutation/overview?id=23520115	COSM1333670	COSV52340276	38078
RPRD2	c.3361C>T	p.R1121C	4	LAPC4	1	150444785	150444785	Missense_Mutation	SNP	C	50	30	20	T	biallelic_het	https://cancer.sanger.ac.uk/cosmic/mutation/overview?id=35326326	COSM3740634	COSV64818971	38078
RPRD2	c.3692C>T	p.A1231V	NA	LAPC4	1	150445116	150445116	Missense_Mutation	SNP	C	69	28	41	T	biallelic_het	NA	NA	NA	NA	NA
PRCC	c.848C>A	p.A283D	NA	LAPC4	1	156756731	156756731	Missense_Mutation	SNP	C	42	15	27	A	monoallelic	NA	NA	NA	NA	NA
ETV3	c.1416dup	p.K473Qfs*10	NA	LAPC4	1	157094755	157094756	Frameshift_Indel	INS	-	38	23	15	G	monoallelic	NA	NA	NA	NA	NA
PBX1	c.430T>C	p.S144P	NA	LAPC4	1	164761895	164761895	Missense_Mutation	SNP	T	53	25	28	C	monoallelic	NA	NA	NA	NA	NA
TPR	c.2796_2798del	p.E932del	NA	LAPC4	1	186316569	186316571	Inframe_Indel	DEL	TCT	52	21	31	-	monoallelic	NA	NA	NA	NA	NA
PTPRC	c.1037A>T	p.N346I	NA	LAPC4	1	198678819	198678819	Missense_Mutation	SNP	A	41	14	27	T	biallelic_het	NA	NA	NA	NA	NA
PTPRC	c.1985G>A	p.R662Q	NA	LAPC4	1	198701439	198701439	Missense_Mutation	SNP	G	42	30	12	A	biallelic_het	NA	NA	NA	NA	NA
MDM4	c.95C>T	p.P32L	NA	LAPC4	1	204495504	204495504	Missense_Mutation	SNP	C	49	33	16	T	monoallelic	NA	NA	NA	NA	NA
TET1	c.5166G>T	p.K1722N	NA	LAPC4	10	70446226	70446226	Missense_Mutation	SNP	G	31	19	12	T	multi_monoallelic	NA	NA	NA	NA	NA
TET1	c.6088A>G	p.T2030A	NA	LAPC4	10	70451248	70451248	Missense_Mutation	SNP	A	32	22	10	G	multi_monoallelic	NA	NA	NA	NA	NA
NDST2	c.736C>T	p.R246W	NA	LAPC4	10	75567411	75567411	Missense_Mutation	SNP	G	39	14	25	A	monoallelic	NA	NA	NA	NA	NA
NUTM2D	c.325T>C	p.F109L	2	LAPC4	10	89120396	89120396	Missense_Mutation	SNP	T	16	0	16	C	biallelic_hom	https://cancer.sanger.ac.uk/cosmic/mutation/overview?id=48496950	COSM4591792	COSV67745869	38078
TLX1	c.374C>T	p.A125V	NA	LAPC4	10	102891672	102891672	Missense_Mutation	SNP	C	36	26	10	T	monoallelic	NA	NA	NA	NA	NA
NFKB2	c.202G>A	p.A68T	NA	LAPC4	10	104156539	104156539	Missense_Mutation	SNP	G	53	17	36	A	monoallelic	NA	NA	NA	NA	NA
NT5C2	c.296del	p.G99Dfs*12	NA	LAPC4	10	104865556	104865556	Frameshift_Indel	DEL	C	28	23	5	-	monoallelic	NA	NA	NA	NA	NA
CARS	c.184del	p.Q62Sfs*12	NA	LAPC4	11	3069073	3069073	Frameshift_Indel	DEL	G	51	30	21	-	monoallelic	NA	NA	NA	NA	NA
LMO1	c.128A>G	p.Y43C	NA	LAPC4	11	8251949	8251949	Missense_Mutation	SNP	T	39	18	21	C	monoallelic	NA	NA	NA	NA	NA
NUMA1	c.5020C>T	p.R1674C	NA	LAPC4	11	71720051	71720051	Missense_Mutation	SNP	G	31	19	12	A	monoallelic	NA	NA	NA	NA	NA
PICALM	c.1870A>G	p.T624A	NA	LAPC4	11	85685825	85685825	Missense_Mutation	SNP	T	44	23	21	C	biallelic_het	NA	NA	NA	NA	NA
PICALM	c.584C>T	p.A195V	NA	LAPC4	11	85723398	85723398	Missense_Mutation	SNP	G	44	23	21	A	biallelic_het	NA	NA	NA	NA	NA
ATM	c.5674+1G>T	p.X1892_splice	NA	LAPC4	11	108175580	108175580	Splice_Site	SNP	G	58	26	32	T	monoallelic	NA	NA	NA	NA	NA
DDX10	c.238del	p.T80Hfs*2	NA	LAPC4	11	108544239	108544239	Frameshift_Indel	DEL	A	38	20	18	-	monoallelic	NA	NA	NA	NA	NA
CBL	c.2015C>T	p.A672V	NA	LAPC4	11	119158635	119158635	Missense_Mutation	SNP	C	37	19	18	T	monoallelic	NA	NA	NA	NA	NA
KCNJ5	c.989del	p.G330Afs*41	NA	LAPC4	11	128786352	128786352	Frameshift_Indel	DEL	G	60	27	33	-	monoallelic	NA	NA	NA	NA	NA
KDM5A	c.3597del	p.G1200Dfs*9	35	LAPC4	12	416953	416953	Frameshift_Indel	DEL	T	23	13	10	-	biallelic_het	https://cancer.sanger.ac.uk/cosmic/mutation/overview?id=44678327	COSM1180773	COSV66990113	54115	endometrium/carcinoma/endometrioid_carcinoma=4/95=4.21%
KDM5A	c.3091C>G	p.R1031G	NA	LAPC4	12	420176	420176	Missense_Mutation	SNP	G	30	9	21	C	biallelic_het	NA	NA	NA	NA	NA
KDM5A	c.3048T>G	p.N1016K	NA	LAPC4	12	420219	420219	Missense_Mutation	SNP	A	24	7	17	C	biallelic_het	NA	NA	NA	NA	NA
ERC1	c.2414del	p.K805Rfs*7	NA	LAPC4	12	1345991	1345991	Frameshift_Indel	DEL	A	42	25	17	-	monoallelic	NA	NA	NA	NA	NA
CHD4	c.3336C>A	p.F1112L	NA	LAPC4	12	6700636	6700636	Missense_Mutation	SNP	G	23	8	15	T	biallelic_het	NA	NA	NA	NA	NA
CHD4	c.3038T>C	p.M1013T	NA	LAPC4	12	6701134	6701134	Missense_Mutation	SNP	A	21	16	5	G	biallelic_het	NA	NA	NA	NA	NA
KMT2D	c.10622C>A	p.A3541D	NA	LAPC4	12	49427968	49427968	Missense_Mutation	SNP	G	48	17	31	T	biallelic_het	NA	NA	NA	NA	NA
KMT2D	c.4907G>A	p.G1636D	1	LAPC4	12	49438583	49438583	Missense_Mutation	SNP	C	25	15	10	T	biallelic_het	https://cancer.sanger.ac.uk/cosmic/mutation/overview?id=26492800	COSM1215199	COSV56477496	38078
KMT2D	c.1295C>T	p.A432V	1	LAPC4	12	49446171	49446171	Missense_Mutation	SNP	G	37	12	25	A	biallelic_het	https://cancer.sanger.ac.uk/cosmic/mutation/overview?id=26466306	COSM7344535	COSV99040257	25533
LRIG3	c.2761C>T	p.P921S	1	LAPC4	12	59268290	59268290	Missense_Mutation	SNP	G	34	11	23	A	monoallelic	https://cancer.sanger.ac.uk/cosmic/mutation/overview?id=27769432	COSM9464838	COSV104631107	38078
PTPN11	c.1649C>T	p.A550V	NA	LAPC4	12	112939997	112939997	Missense_Mutation	SNP	C	31	22	9	T	monoallelic	NA	NA	NA	NA	NA
TBX3	c.438del	p.A147Pfs*6	NA	LAPC4	12	115118903	115118903	Frameshift_Indel	DEL	T	23	13	10	-	monoallelic	NA	NA	NA	NA	NA
NCOR2	c.6886C>T	p.R2296W	NA	LAPC4	12	124816883	124816883	Missense_Mutation	SNP	G	41	9	32	A	biallelic_hom	NA	NA	NA	NA	NA
NCOR2	c.5821C>T	p.R1941W	NA	LAPC4	12	124821593	124821593	Missense_Mutation	SNP	G	44	10	34	A	biallelic_hom	NA	NA	NA	NA	NA
NCOR2	c.5509_5517dup	p.S1837_G1839dup	27	LAPC4	12	124824721	124824722	Inframe_Indel	INS	-	60	0	60	GCCGCTGCT	biallelic_hom	https://cancer.sanger.ac.uk/cosmic/mutation/overview?id=45371441	COSM1359887	COSV62292510	41645
NCOR2	c.1526_1531dup	p.Q509_Q510dup	NA	LAPC4	12	124887058	124887059	Inframe_Indel	INS	-	25	6	19	GCTGCT	biallelic_hom	NA	NA	NA	NA	NA
POLE	c.5900C>T	p.A1967V	NA	LAPC4	12	133210876	133210876	Missense_Mutation	SNP	G	37	25	12	A	multi_monoallelic	NA	NA	NA	NA	NA
POLE	c.4647del	p.K1550Nfs*12	NA	LAPC4	12	133219487	133219487	Frameshift_Indel	DEL	G	32	24	8	-	multi_monoallelic	NA	NA	NA	NA	NA
LATS2	c.1366A>G	p.T456A	NA	LAPC4	13	21562553	21562553	Missense_Mutation	SNP	T	19	12	7	C	monoallelic	NA	NA	NA	NA	NA
BRCA2	c.7976+1G>A	p.X2659_splice	NA	LAPC4	13	32936831	32936831	Splice_Site	SNP	G	50	20	30	A	monoallelic	NA	NA	NA	NA	NA
FOXA1	c.1077del	p.I360*	1	LAPC4	14	38060912	38060912	Frameshift_Indel	DEL	G	57	22	35	-	biallelic_het	https://cancer.sanger.ac.uk/cosmic/mutation/overview?id=22492031	COSM5547496	COSV51646414	38078
FOXA1	c.680G>A	p.C227Y	2	LAPC4	14	38061309	38061309	Missense_Mutation	SNP	C	54	37	17	T	biallelic_het	https://cancer.sanger.ac.uk/cosmic/mutation/overview?id=22489744	COSM6404397	COSV51643849	38078
ARID4A	c.2335del	p.T779Qfs*26	1	LAPC4	14	58831137	58831137	Frameshift_Indel	DEL	A	35	23	12	-	monoallelic	https://cancer.sanger.ac.uk/cosmic/mutation/overview?id=33263013	COSM5078984	COSV62164369	38078
GPHN	c.955A>G	p.T319A	NA	LAPC4	14	67432034	67432034	Missense_Mutation	SNP	A	40	18	22	G	monoallelic	NA	NA	NA	NA	NA
TSHR	c.2149A>G	p.T717A	NA	LAPC4	14	81610551	81610551	Missense_Mutation	SNP	A	66	35	31	G	monoallelic	NA	NA	NA	NA	NA
BCL11B	c.698C>T	p.A233V	1	LAPC4	14	99642475	99642475	Missense_Mutation	SNP	G	52	33	19	A	monoallelic	https://cancer.sanger.ac.uk/cosmic/mutation/overview?id=34497742	COSM3401577	COSV61740186	38078
AKT1	c.49G>A	p.E17K	701	LAPC4	14	105246551	105246551	Missense_Mutation	SNP	C	49	22	27	T	monoallelic	https://cancer.sanger.ac.uk/cosmic/mutation/overview?id=84345696	COSM33765	COSV62571334	94230	breast/carcinoma/NS=61/3743=1.63%;bone/Overgrowth_syndrome/Proteus_syndrome=14/20=70%;thyroid/carcinoma/anaplastic_carcinoma=12/642=1.87%;meninges/meningioma/meningothelial=17/325=5.23%;NS/carcinoma/of_unknown_primary=4/209=1.91%;soft_tissue/desmoid_tumour-fibromatosis/NS=8/256=3.13%;breast/carcinoma/hormone_receptor-positive_carcinoma=9/328=2.74%;meninges/meningioma/transitional=5/259=1.93%;soft…
MGA	c.103A>G	p.K35E	NA	LAPC4	15	41961195	41961195	Missense_Mutation	SNP	A	22	16	6	G	Noinfo	NA	NA	NA	NA	NA
MGA	c.668T>C	p.V223A	NA	LAPC4	15	41961760	41961760	Missense_Mutation	SNP	T	36	21	15	C	Noinfo	NA	NA	NA	NA	NA
MYO5A	c.3677G>A	p.R1226H	NA	LAPC4	15	52643623	52643623	Missense_Mutation	SNP	C	26	15	11	T	multi_monoallelic	NA	NA	NA	NA	NA
MYO5A	c.1874G>A	p.G625D	NA	LAPC4	15	52676398	52676398	Missense_Mutation	SNP	C	32	21	11	T	multi_monoallelic	NA	NA	NA	NA	NA
NTRK3	c.1488del	p.D499Tfs*7	NA	LAPC4	15	88576185	88576185	Frameshift_Indel	DEL	G	30	11	19	-	monoallelic	NA	NA	NA	NA	NA
CRTC3	c.718C>T	p.R240C	2	LAPC4	15	91162991	91162991	Missense_Mutation	SNP	C	23	19	4	T	monoallelic	https://cancer.sanger.ac.uk/cosmic/mutation/overview?id=22956542	COSM2140111	COSV51597434	38078
BLM	c.1544del	p.N515Mfs*16	29	LAPC4	15	91304139	91304139	Frameshift_Indel	DEL	A	25	12	13	-	monoallelic	https://cancer.sanger.ac.uk/cosmic/mutation/overview?id=32383605	COSM252959	COSV61921885	54036
FES	c.2140G>A	p.A714T	1	LAPC4	15	91436978	91436978	Missense_Mutation	SNP	G	31	20	11	A	monoallelic	https://cancer.sanger.ac.uk/cosmic/mutation/overview?id=30844089	COSM2140410	COSV60996979	2275
TSC2	c.1763A>G	p.E588G	NA	LAPC4	16	2120503	2120503	Missense_Mutation	SNP	A	38	24	14	G	monoallelic	NA	NA	NA	NA	NA
TRAF7	c.81+1dup		NA	LAPC4	16	2213999	2214000	Frameshift_Indel	INS	-	20	8	12	G	monoallelic	NA	NA	NA	NA	NA
GRIN2A	c.4021del	p.S1341Afs*56	NA	LAPC4	16	9857380	9857380	Frameshift_Indel	DEL	T	43	10	33	-	monoallelic	NA	NA	NA	NA	NA
RMI2	c.310G>C	p.V104L	NA	LAPC4	16	11444513	11444513	Missense_Mutation	SNP	G	20	7	13	C	monoallelic	NA	NA	NA	NA	NA
MYH11	c.5219G>A	p.R1740H	NA	LAPC4	16	15812269	15812269	Missense_Mutation	SNP	C	68	50	18	T	multi_monoallelic	NA	NA	NA	NA	NA
MYH11	c.3551C>T	p.T1184M	NA	LAPC4	16	15826542	15826542	Missense_Mutation	SNP	G	52	37	15	A	multi_monoallelic	NA	NA	NA	NA	NA
PALB2	c.1193T>C	p.V398A	NA	LAPC4	16	23646674	23646674	Missense_Mutation	SNP	A	26	6	20	G	monoallelic	NA	NA	NA	NA	NA
IL21R	c.1159C>A	p.P387T	NA	LAPC4	16	27460146	27460146	Missense_Mutation	SNP	C	25	18	7	A	multi_monoallelic	NA	NA	NA	NA	NA
IL21R	c.1549del	p.R517Gfs*38	2	LAPC4	16	27460530	27460530	Frameshift_Indel	DEL	C	28	16	12	-	multi_monoallelic	https://cancer.sanger.ac.uk/cosmic/mutation/overview?id=29341547	COSM3108808	COSV61969533	38078
CDH1	c.44_46dup	p.L15dup	NA	LAPC4	16	68771347	68771348	Inframe_Indel	INS	-	25	20	5	GCT	multi_monoallelic	NA	NA	NA	NA	NA
CDH1	c.377del	p.P126Rfs*89	19	LAPC4	16	68835781	68835781	Frameshift_Indel	DEL	C	22	11	11	-	multi_monoallelic	https://cancer.sanger.ac.uk/cosmic/mutation/overview?id=21996863	COSM19494	COSV55728718	68745	stomach/carcinoma/intestinal_adenocarcinoma=4/230=1.74%
ZFHX3	c.10810G>A	p.A3604T	1	LAPC4	16	72821365	72821365	Missense_Mutation	SNP	C	5	0	5	T	biallelic_het	https://cancer.sanger.ac.uk/cosmic/mutation/overview?id=23053475	COSM1379694	COSV51738826	38078
ZFHX3	c.10579_10581del	p.G3527del	5	LAPC4	16	72821594	72821596	Inframe_Indel	DEL	GCC	11	7	4	-	biallelic_het	https://cancer.sanger.ac.uk/cosmic/mutation/overview?id=23040462	COSM3276731	COSV51707637	38078
ZFHX3	c.9589del	p.Q3197Sfs*44	9	LAPC4	16	72822586	72822586	Frameshift_Indel	DEL	G	37	17	20	-	biallelic_het	https://cancer.sanger.ac.uk/cosmic/mutation/overview?id=23038760	COSM5078997	COSV51713247	51932
ZFHX3	c.5774del	p.G1925Vfs*72	5	LAPC4	16	72830807	72830807	Frameshift_Indel	DEL	C	27	13	14	-	biallelic_het	https://cancer.sanger.ac.uk/cosmic/mutation/overview?id=23034953	COSM3276851	COSV51710890	51932
ZFHX3	c.3435del	p.S1146Pfs*41	1	LAPC4	16	72923643	72923643	Frameshift_Indel	DEL	G	43	29	14	-	biallelic_het	https://cancer.sanger.ac.uk/cosmic/mutation/overview?id=23056710	COSM6856716	COSV51715638	13854
ZFHX3	c.3229C>T	p.H1077Y	NA	LAPC4	16	72923849	72923849	Missense_Mutation	SNP	G	48	35	13	A	biallelic_het	NA	NA	NA	NA	NA
ZFHX3	c.1957C>T	p.R653C	2	LAPC4	16	72992088	72992088	Missense_Mutation	SNP	G	54	35	19	A	biallelic_het	https://cancer.sanger.ac.uk/cosmic/mutation/overview?id=23036202	COSM4441663	COSV51716774	38078
USP6	c.3752del	p.G1251Afs*14	1	LAPC4	17	5074002	5074002	Frameshift_Indel	DEL	G	40	19	21	-	monoallelic	https://cancer.sanger.ac.uk/cosmic/mutation/overview?id=88163132	COSM6818958	COSV51476173	38078
TP53	c.532dup	p.H178Pfs*3	11	LAPC4	17	7578397	7578398	Frameshift_Indel	INS	-	49	23	26	G	biallelic_het	https://cancer.sanger.ac.uk/cosmic/mutation/overview?id=23725352	COSM673518	COSV52756284	167988
TP53	c.524G>A	p.R175H	1870	LAPC4	17	7578406	7578406	Missense_Mutation	SNP	C	47	24	23	T	biallelic_het	https://cancer.sanger.ac.uk/cosmic/mutation/overview?id=23639796	COSM10648	COSV52661038	167988	endometrium/carcinoma/endometrioid_carcinoma=17/1373=1.24%;central_nervous_system/glioma/astrocytoma=11/733=1.5%;ovary/carcinoma/NS=24/1948=1.23%;endometrium/carcinoma/mixed_serous_and_endometrioid_carcinoma=4/52=7.69%;ovary/carcinoma/endometrioid_carcinoma=6/185=3.24%;vulva/carcinoma/squamous_cell_carcinoma=9/231=3.9%;large_intestine/carcinoma/neuroendocrine_carcinoma=6/39=15.38%;salivary_gland/…
CHD3	c.1795del	p.R599Vfs*16	23	LAPC4	17	7798765	7798765	Frameshift_Indel	DEL	C	60	37	23	-	monoallelic	https://cancer.sanger.ac.uk/cosmic/mutation/overview?id=41878473	COSM1387351	COSV57872218	38078
NCOR1	c.4045C>T	p.R1349C	2	LAPC4	17	15974830	15974830	Missense_Mutation	SNP	G	21	11	10	A	multi_monoallelic	https://cancer.sanger.ac.uk/cosmic/mutation/overview?id=23207237	COSM9113138	COSV99249345	55372
NCOR1	c.1914del	p.G639Vfs*2	2	LAPC4	17	16022738	16022738	Frameshift_Indel	DEL	T	32	15	17	-	multi_monoallelic	https://cancer.sanger.ac.uk/cosmic/mutation/overview?id=23209987	COSM6938544	COSV51981868	17294
NF1	c.2835dup	p.D946*	3	LAPC4	17	29556462	29556463	Frameshift_Indel	INS	-	32	17	15	T	monoallelic	https://cancer.sanger.ac.uk/cosmic/mutation/overview?id=34062805	COSM1382073	COSV62194264	38078
LASP1	c.625G>A	p.A209T	NA	LAPC4	17	37074870	37074870	Missense_Mutation	SNP	G	45	18	27	A	monoallelic	NA	NA	NA	NA	NA
CDK12	c.4382del	p.G1461Afs*38	14	LAPC4	17	37687472	37687472	Frameshift_Indel	DEL	G	31	20	11	-	monoallelic	https://cancer.sanger.ac.uk/cosmic/mutation/overview?id=55678303	COSM2837928	COSV70999178	56269
RARA	c.1109G>A	p.R370H	1	LAPC4	17	38511611	38511611	Missense_Mutation	SNP	G	46	22	24	A	monoallelic	https://cancer.sanger.ac.uk/cosmic/mutation/overview?id=20081507	COSM2839081	COSV54190268	14917
STAT5B	c.1807G>T	p.A603S	NA	LAPC4	17	40362288	40362288	Missense_Mutation	SNP	C	57	28	29	A	monoallelic	NA	NA	NA	NA	NA
STAT3	c.2186G>A	p.R729H	1	LAPC4	17	40468878	40468878	Missense_Mutation	SNP	C	49	25	24	T	monoallelic	https://cancer.sanger.ac.uk/cosmic/mutation/overview?id=23810490	COSM3188671	COSV52886224	38078
ETV4	c.399del	p.R134Dfs*30	5	LAPC4	17	41610701	41610701	Frameshift_Indel	DEL	G	48	29	19	-	monoallelic	https://cancer.sanger.ac.uk/cosmic/mutation/overview?id=28086705	COSM5181372	COSV60044247	38078
CDC27	c.2362C>T	p.R788C	NA	LAPC4	17	45199858	45199858	Missense_Mutation	SNP	G	42	26	16	A	monoallelic	NA	NA	NA	NA	NA
COL1A1	c.3479G>A	p.G1160D	NA	LAPC4	17	48264428	48264428	Missense_Mutation	SNP	C	55	30	25	T	monoallelic	NA	NA	NA	NA	NA
RNF43	c.349del	p.R117Afs*41	46	LAPC4	17	56448298	56448298	Frameshift_Indel	DEL	G	34	20	14	-	monoallelic	https://cancer.sanger.ac.uk/cosmic/mutation/overview?id=90511997	COSM1384762	COSV68456762	55535	stomach/carcinoma/adenocarcinoma=4/383=1.04%;large_intestine/adenoma/NS=11/86=12.79%
CLTC	c.3498G>T	p.E1166D	NA	LAPC4	17	57759687	57759687	Missense_Mutation	SNP	G	48	24	24	T	monoallelic	NA	NA	NA	NA	NA
ZNF521	c.1651A>G	p.T551A	NA	LAPC4	18	22806231	22806231	Missense_Mutation	SNP	T	47	16	31	C	multi_monoallelic	NA	NA	NA	NA	NA
ZNF521	c.521A>C	p.Y174S	NA	LAPC4	18	22807361	22807361	Missense_Mutation	SNP	T	31	7	24	G	multi_monoallelic	NA	NA	NA	NA	NA
SETBP1	c.1923A>C	p.K641N	2	LAPC4	18	42531228	42531228	Missense_Mutation	SNP	A	44	13	31	C	biallelic_het	https://cancer.sanger.ac.uk/cosmic/mutation/overview?id=26126753	COSM4725129	COSV56319375	38078
SETBP1	c.2560T>A	p.S854T	NA	LAPC4	18	42531865	42531865	Missense_Mutation	SNP	T	39	24	15	A	biallelic_het	NA	NA	NA	NA	NA
MBD1	c.1165G>A	p.V389I	NA	LAPC4	18	47800215	47800215	Missense_Mutation	SNP	C	44	15	29	T	monoallelic	NA	NA	NA	NA	NA
SMAD4	c.868C>T	p.H290Y	NA	LAPC4	18	48584790	48584790	Missense_Mutation	SNP	C	16	4	12	T	monoallelic	NA	NA	NA	NA	NA
TCF3	c.1939G>A	p.A647T	NA	LAPC4	19	1611732	1611732	Missense_Mutation	SNP	C	30	22	8	T	monoallelic	NA	NA	NA	NA	NA
COL5A3	c.3143del	p.P1048Lfs*96	NA	LAPC4	19	10088132	10088132	Frameshift_Indel	DEL	G	43	32	11	-	monoallelic	NA	NA	NA	NA	NA
KEAP1	c.149G>A	p.R50H	NA	LAPC4	19	10610561	10610561	Missense_Mutation	SNP	C	43	17	26	T	monoallelic	NA	NA	NA	NA	NA
DNAJB1	c.806G>A	p.C269Y	NA	LAPC4	19	14626969	14626969	Missense_Mutation	SNP	C	37	24	13	T	monoallelic	NA	NA	NA	NA	NA
ELL	c.1807G>A	p.A603T	NA	LAPC4	19	18555621	18555621	Missense_Mutation	SNP	C	20	4	16	T	monoallelic	NA	NA	NA	NA	NA
CEBPA	c.50G>A	p.S17N	NA	LAPC4	19	33793271	33793271	Missense_Mutation	SNP	C	18	10	8	T	monoallelic	NA	NA	NA	NA	NA
CD79A	c.390del	p.R131Gfs*61	NA	LAPC4	19	42383610	42383610	Frameshift_Indel	DEL	C	37	9	28	-	monoallelic	NA	NA	NA	NA	NA
ERF	c.896del	p.G299Efs*12	NA	LAPC4	19	42753368	42753368	Frameshift_Indel	DEL	C	34	19	15	-	biallelic_het	NA	NA	NA	NA	NA
ERF	c.879del	p.S295Afs*16	NA	LAPC4	19	42753385	42753385	Frameshift_Indel	DEL	C	42	17	25	-	biallelic_het	NA	NA	NA	NA	NA
CIC	c.1064G>A	p.G355D	NA	LAPC4	19	42776999	42776999	Missense_Mutation	SNP	G	29	17	12	A	biallelic_het	NA	NA	NA	NA	NA
CIC	c.3347del	p.P1116Qfs*45	8	LAPC4	19	42796883	42796883	Frameshift_Indel	DEL	C	47	15	32	-	biallelic_het	https://cancer.sanger.ac.uk/cosmic/mutation/overview?id=88868217	COSM3287149	COSV50566699	55179
CIC	c.3761A>G	p.E1254G	NA	LAPC4	19	42797399	42797399	Missense_Mutation	SNP	A	26	17	9	G	biallelic_het	NA	NA	NA	NA	NA
CIC	c.3828G>A	p.W1276*	NA	LAPC4	19	42797776	42797776	Nonsense_Mutation	SNP	G	42	25	17	A	biallelic_het	NA	NA	NA	NA	NA
CIC	c.4394G>A	p.R1465H	3	LAPC4	19	42798822	42798822	Missense_Mutation	SNP	G	44	23	21	A	biallelic_het	https://cancer.sanger.ac.uk/cosmic/mutation/overview?id=88870909	COSM9112929	COSV99360490	55179
CBLC	c.338C>T	p.A113V	NA	LAPC4	19	45281526	45281526	Missense_Mutation	SNP	C	28	17	11	T	multi_monoallelic	NA	NA	NA	NA	NA
CBLC	c.967G>A	p.G323S	NA	LAPC4	19	45293310	45293310	Missense_Mutation	SNP	G	42	30	12	A	multi_monoallelic	NA	NA	NA	NA	NA
ERCC2	c.937G>A	p.E313K	1	LAPC4	19	45867256	45867256	Missense_Mutation	SNP	C	36	26	10	T	monoallelic	https://cancer.sanger.ac.uk/cosmic/mutation/overview?id=41926276	COSM6970620	COSV55546102	15393
BAX	c.121del	p.E41Rfs*19	58	LAPC4	19	49458971	49458971	Frameshift_Indel	DEL	G	25	3	22	-	biallelic_hom	https://cancer.sanger.ac.uk/cosmic/mutation/overview?id=20172093	COSM309434	COSV53168804	38078	biliary_tract/carcinoma/NS=4/266=1.5%;large_intestine/carcinoma/adenocarcinoma=41/2391=1.71%
POLD1	c.932G>A	p.R311H	NA	LAPC4	19	50905960	50905960	Missense_Mutation	SNP	G	50	32	18	A	biallelic_het	NA	NA	NA	NA	NA
POLD1	c.3022C>T	p.R1008C	2	LAPC4	19	50919935	50919935	Missense_Mutation	SNP	C	31	12	19	T	biallelic_het	https://cancer.sanger.ac.uk/cosmic/mutation/overview?id=53525103	COSM5172036	COSV54529893	52286
PPP2R1A	c.253T>C	p.Y85H	NA	LAPC4	19	52709299	52709299	Missense_Mutation	SNP	T	28	6	22	C	monoallelic	NA	NA	NA	NA	NA
CNOT3	c.58G>A	p.E20K	13	LAPC4	19	54646887	54646887	Missense_Mutation	SNP	G	34	11	23	A	monoallelic	https://cancer.sanger.ac.uk/cosmic/mutation/overview?id=47771955	COSM96799	COSV55360792	38078
ITSN2	c.2153G>A	p.R718Q	NA	LAPC4	2	24494739	24494739	Missense_Mutation	SNP	C	24	14	10	T	monoallelic	NA	NA	NA	NA	NA
DNMT3A	c.1307A>G	p.Y436C	1	LAPC4	2	25469151	25469151	Missense_Mutation	SNP	T	35	21	14	C	monoallelic	https://cancer.sanger.ac.uk/cosmic/mutation/overview?id=23916219	COSM4093268	COSV53053441	38078
STRN	c.1946G>A	p.R649H	NA	LAPC4	2	37082387	37082387	Missense_Mutation	SNP	C	26	13	13	T	monoallelic	NA	NA	NA	NA	NA
EPAS1	c.1972C>T	p.R658C	NA	LAPC4	2	46607783	46607783	Missense_Mutation	SNP	C	36	28	8	T	monoallelic	NA	NA	NA	NA	NA
MSH2	c.899T>G	p.M300R	NA	LAPC4	2	47641514	47641514	Missense_Mutation	SNP	T	18	11	7	G	biallelic_hom	NA	NA	NA	NA	NA
MSH2	c.942+2_942+8del	p.X314_splice	NA	LAPC4	2	47641559	47641565	Splice_Site	DEL	TAAAAAA	11	5	6	-	biallelic_hom	NA	NA	NA	NA	NA
MSH6	c.3261dup	p.F1088Lfs*5	NA	LAPC4	2	48030639	48030640	Frameshift_Indel	INS	-	31	22	9	C	monoallelic	NA	NA	NA	NA	NA
BCL11A	c.2006T>C	p.L669P	NA	LAPC4	2	60688041	60688041	Missense_Mutation	SNP	A	61	17	44	G	multi_monoallelic	NA	NA	NA	NA	NA
BCL11A	c.1510_1512del	p.E504del	NA	LAPC4	2	60688535	60688537	Inframe_Indel	DEL	CTC	31	12	19	-	multi_monoallelic	NA	NA	NA	NA	NA
DCTN1	c.2780G>A	p.R927Q	NA	LAPC4	2	74593126	74593126	Missense_Mutation	SNP	C	35	13	22	T	monoallelic	NA	NA	NA	NA	NA
ERCC3	c.1925G>A	p.R642Q	1	LAPC4	2	128028932	128028932	Missense_Mutation	SNP	C	32	17	15	T	multi_monoallelic	https://cancer.sanger.ac.uk/cosmic/mutation/overview?id=20348025	COSM9169223	COSV99573788	38078
ERCC3	c.777A>T	p.E259D	6	LAPC4	2	128046958	128046958	Missense_Mutation	SNP	T	24	10	14	A	multi_monoallelic	https://cancer.sanger.ac.uk/cosmic/mutation/overview?id=20347310	COSM6961143	COSV53425973	52854
CXCR4	c.490G>A	p.V164I	4	LAPC4	2	136873020	136873020	Missense_Mutation	SNP	C	42	17	25	T	monoallelic	https://cancer.sanger.ac.uk/cosmic/mutation/overview?id=46739079	COSM5950644	COSV54011460	53372
LRP1B	c.12188G>A	p.R4063K	NA	LAPC4	2	141092057	141092057	Missense_Mutation	SNP	C	32	26	6	T	monoallelic	NA	NA	NA	NA	NA
ACVR2A	c.1310del	p.K437Rfs*5	NA	LAPC4	2	148683686	148683686	Frameshift_Indel	DEL	A	22	0	22	-	biallelic_hom	NA	NA	NA	NA	NA
PTPRT	c.3224del	p.P1075Rfs*6	NA	LAPC4	20	40739003	40739003	Frameshift_Indel	DEL	G	33	11	22	-	biallelic_het	NA	NA	NA	NA	NA
PTPRT	c.82G>A	p.A28T	NA	LAPC4	20	41818292	41818292	Missense_Mutation	SNP	C	26	14	12	T	biallelic_het	NA	NA	NA	NA	NA
MATN4	c.1600A>T	p.T534S	NA	LAPC4	20	43922635	43922635	Missense_Mutation	SNP	T	36	20	16	A	monoallelic	NA	NA	NA	NA	NA
NFATC2	c.2543dup	p.V849Gfs*35	NA	LAPC4	20	50048782	50048783	Frameshift_Indel	INS	-	30	16	14	G	biallelic_het	NA	NA	NA	NA	NA
NFATC2	c.1547C>T	p.A516V	2	LAPC4	20	50090678	50090678	Missense_Mutation	SNP	G	52	28	24	A	biallelic_het	https://cancer.sanger.ac.uk/cosmic/mutation/overview?id=43187607	COSM4099404	COSV65354277	38078
NFATC2	c.378del	p.L128Sfs*3	1	LAPC4	20	50140402	50140402	Frameshift_Indel	DEL	C	51	26	25	-	biallelic_het	https://cancer.sanger.ac.uk/cosmic/mutation/overview?id=43192070	COSM6725289	COSV65353935	38078
PTK6	c.349T>C	p.S117P	NA	LAPC4	20	62166294	62166294	Missense_Mutation	SNP	A	37	21	16	G	monoallelic	NA	NA	NA	NA	NA
ITSN1	c.2392G>A	p.A798T	NA	LAPC4	21	35183351	35183351	Missense_Mutation	SNP	G	54	20	34	A	monoallelic	NA	NA	NA	NA	NA
BCR	c.2951C>T	p.T984M	NA	LAPC4	22	23637281	23637281	Missense_Mutation	SNP	C	41	27	14	T	biallelic_het	NA	NA	NA	NA	NA
BCR	c.3245G>A	p.G1082D	NA	LAPC4	22	23653946	23653946	Missense_Mutation	SNP	G	29	8	21	A	biallelic_het	NA	NA	NA	NA	NA
MN1	c.1596_1598dup	p.Q550dup	NA	LAPC4	22	28194933	28194934	Inframe_Indel	INS	-	16	10	6	TGC	biallelic_het	NA	NA	NA	NA	NA
MN1	c.304C>T	p.P102S	NA	LAPC4	22	28196228	28196228	Missense_Mutation	SNP	G	53	28	25	A	biallelic_het	NA	NA	NA	NA	NA
PDGFB	c.584dup	p.S196Ffs*36	NA	LAPC4	22	39626105	39626106	Frameshift_Indel	INS	-	20	15	5	C	monoallelic	NA	NA	NA	NA	NA
EP300	c.1244T>C	p.L415P	NA	LAPC4	22	41525969	41525969	Missense_Mutation	SNP	T	35	13	22	C	monoallelic	NA	NA	NA	NA	NA
BRPF1	c.2812del	p.Q938Sfs*5	NA	LAPC4	3	9786078	9786078	Frameshift_Indel	DEL	C	27	19	8	-	monoallelic	NA	NA	NA	NA	NA
FANCD2	c.3242del	p.P1081Lfs*18	NA	LAPC4	3	10127512	10127512	Frameshift_Indel	DEL	C	42	21	21	-	monoallelic	NA	NA	NA	NA	NA
RAF1	c.488T>C	p.F163S	NA	LAPC4	3	12650358	12650358	Missense_Mutation	SNP	A	46	34	12	G	monoallelic	NA	NA	NA	NA	NA
SETD2	c.843del	p.E282Kfs*19	NA	LAPC4	3	47165283	47165283	Frameshift_Indel	DEL	T	42	31	11	-	monoallelic	NA	NA	NA	NA	NA
CACNA1D	c.1706A>T	p.D569V	NA	LAPC4	3	53756481	53756481	Missense_Mutation	SNP	A	43	14	29	T	biallelic_het	NA	NA	NA	NA	NA
CACNA1D	c.5413C>A	p.H1805N	NA	LAPC4	3	53835397	53835397	Missense_Mutation	SNP	C	34	12	22	A	biallelic_het	NA	NA	NA	NA	NA
FOXP1	c.334T>C	p.S112P	NA	LAPC4	3	71247066	71247066	Missense_Mutation	SNP	A	65	29	36	G	monoallelic	NA	NA	NA	NA	NA
POLQ	c.5390G>T	p.S1797I	NA	LAPC4	3	121206388	121206388	Missense_Mutation	SNP	C	31	15	16	A	multi_monoallelic	NA	NA	NA	NA	NA
POLQ	c.3074del	p.K1025Rfs*4	NA	LAPC4	3	121208704	121208704	Frameshift_Indel	DEL	T	29	20	9	-	multi_monoallelic	NA	NA	NA	NA	NA
ATR	c.5851C>T	p.R1951*	NA	LAPC4	3	142215250	142215250	Nonsense_Mutation	SNP	G	9	4	5	A	monoallelic	NA	NA	NA	NA	NA
MECOM	c.2027del	p.G676Efs*33	NA	LAPC4	3	168833264	168833264	Frameshift_Indel	DEL	C	43	27	16	-	monoallelic	NA	NA	NA	NA	NA
FGFR3	c.1144G>A	p.G382R	NA	LAPC4	4	1806119	1806119	Missense_Mutation	SNP	G	22	11	11	A	monoallelic	NA	NA	NA	NA	NA
PDS5A	c.2105_2106insGTGACCTGTATTTCTAAAAATTTGAATAGCAGCTTCTGCTATTCAAATTTT	p.I701_F702insL*	NA	LAPC4	4	39878660	39878661	Nonsense_Mutation	INS	-	11	9	2	AAAATTTGAATAGCAGAAGCTGCTATTCAAATTTTTAGAAATACAGGTCAC	monoallelic	NA	NA	NA	NA	NA
PHOX2B	c.478G>A	p.A160T	NA	LAPC4	4	41748291	41748291	Missense_Mutation	SNP	C	28	15	13	T	monoallelic	NA	NA	NA	NA	NA
KDR	c.1532dup	p.N511Kfs*21	NA	LAPC4	4	55972857	55972858	Frameshift_Indel	INS	-	19	13	6	T	monoallelic	NA	NA	NA	NA	NA
PTPN13	c.1019del	p.K340Rfs*10	NA	LAPC4	4	87622773	87622773	Frameshift_Indel	DEL	A	30	22	8	-	monoallelic	NA	NA	NA	NA	NA
TET2	c.737C>T	p.T246I	NA	LAPC4	4	106155836	106155836	Missense_Mutation	SNP	C	26	11	15	T	multi_monoallelic	NA	NA	NA	NA	NA
TET2	c.4354C>T	p.R1452*	20	LAPC4	4	106193892	106193892	Nonsense_Mutation	SNP	C	33	14	19	T	multi_monoallelic	https://cancer.sanger.ac.uk/cosmic/mutation/overview?id=80174756	COSM41706	COSV54398405	75679
FAT4	c.2335G>A	p.V779I	NA	LAPC4	4	126239901	126239901	Missense_Mutation	SNP	G	35	26	9	A	monoallelic	NA	NA	NA	NA	NA
TERT	c.336del	p.E113Rfs*15	5	LAPC4	5	1294665	1294665	Frameshift_Indel	DEL	G	42	22	20	-	monoallelic	https://cancer.sanger.ac.uk/cosmic/mutation/overview?id=28084595	COSM4733117	COSV57215630	97493
IL7R	c.799del	p.R267Gfs*28	11	LAPC4	5	35874637	35874637	Frameshift_Indel	DEL	A	42	25	17	-	monoallelic	https://cancer.sanger.ac.uk/cosmic/mutation/overview?id=24807449	COSM1132948	COSV57406620	57480
MAP3K1	c.1852G>A	p.A618T	NA	LAPC4	5	56171024	56171024	Missense_Mutation	SNP	G	41	14	27	A	monoallelic	NA	NA	NA	NA	NA
CHD1	c.1913G>A	p.R638H	NA	LAPC4	5	98229198	98229198	Missense_Mutation	SNP	C	32	11	21	T	monoallelic	NA	NA	NA	NA	NA
AFF4	c.1695dup	p.Q566Tfs*6	4	LAPC4	5	132232626	132232627	Frameshift_Indel	INS	-	36	28	8	T	multi_monoallelic	https://cancer.sanger.ac.uk/cosmic/mutation/overview?id=20093948	COSM3729930	COSV54794294	38078
AFF4	c.1416G>A	p.W472*	1	LAPC4	5	132232906	132232906	Nonsense_Mutation	SNP	C	45	34	11	T	multi_monoallelic	https://cancer.sanger.ac.uk/cosmic/mutation/overview?id=20093755	COSM6595930	COSV54795191	38078
PDGFRB	c.1001G>A	p.R334Q	NA	LAPC4	5	149512439	149512439	Missense_Mutation	SNP	C	25	8	17	T	multi_monoallelic	NA	NA	NA	NA	NA
PDGFRB	c.181G>T	p.V61L	NA	LAPC4	5	149515301	149515301	Missense_Mutation	SNP	C	28	9	19	A	multi_monoallelic	NA	NA	NA	NA	NA
FGFR4	c.1390dup	p.R464Pfs*32	NA	LAPC4	5	176520540	176520541	Frameshift_Indel	INS	-	24	17	7	C	monoallelic	NA	NA	NA	NA	NA
NSD1	c.4923A>G	p.I1641M	NA	LAPC4	5	176684109	176684109	Missense_Mutation	SNP	A	46	28	18	G	monoallelic	NA	NA	NA	NA	NA
FLT4	c.3640G>T	p.A1214S	NA	LAPC4	5	180038377	180038377	Missense_Mutation	SNP	C	35	8	27	A	multi_monoallelic	NA	NA	NA	NA	NA
FLT4	c.1684T>C	p.S562P	NA	LAPC4	5	180048878	180048878	Missense_Mutation	SNP	A	22	5	17	G	multi_monoallelic	NA	NA	NA	NA	NA
HIST1H3B	c.365C>A	p.P122H	NA	LAPC4	6	26031924	26031924	Missense_Mutation	SNP	G	38	27	11	T	monoallelic	NA	NA	NA	NA	NA
SRSF3	c.296G>A	p.R99H	2	LAPC4	6	36566715	36566715	Missense_Mutation	SNP	G	37	26	11	A	monoallelic	https://cancer.sanger.ac.uk/cosmic/mutation/overview?id=37995842	COSM3076208	COSV59672375	38078
ZNF292	c.3254G>A	p.G1085E	NA	LAPC4	6	87966601	87966601	Missense_Mutation	SNP	G	28	8	20	A	monoallelic	NA	NA	NA	NA	NA
ROS1	c.1313T>C	p.V438A	1	LAPC4	6	117710959	117710959	Missense_Mutation	SNP	A	32	13	19	G	monoallelic	https://cancer.sanger.ac.uk/cosmic/mutation/overview?id=36975464	COSM6005716	COSV63852242	16088
RSPO3	c.449T>C	p.V150A	NA	LAPC4	6	127476398	127476398	Missense_Mutation	SNP	T	42	35	7	C	monoallelic	NA	NA	NA	NA	NA
TNFAIP3	c.1368del	p.P457Lfs*20	9	LAPC4	6	138199945	138199945	Frameshift_Indel	DEL	G	28	8	20	-	monoallelic	https://cancer.sanger.ac.uk/cosmic/mutation/overview?id=23849672	COSM303678	COSV52797271	57921
LATS1	c.888G>A	p.W296*	NA	LAPC4	6	150005337	150005337	Nonsense_Mutation	SNP	C	48	38	10	T	monoallelic	NA	NA	NA	NA	NA
NOX3	c.253A>G	p.I85V	NA	LAPC4	6	155775947	155775947	Missense_Mutation	SNP	T	47	12	35	C	monoallelic	NA	NA	NA	NA	NA
IGF2R	c.1217C>T	p.S406L	1	LAPC4	6	160455456	160455456	Missense_Mutation	SNP	C	37	7	30	T	biallelic_het	https://cancer.sanger.ac.uk/cosmic/mutation/overview?id=33698840	COSM5436024	COSV63630868	38078
IGF2R	c.1882A>G	p.T628A	NA	LAPC4	6	160466893	160466893	Missense_Mutation	SNP	A	48	9	39	G	biallelic_het	NA	NA	NA	NA	NA
IGF2R	c.2330A>G	p.Q777R	NA	LAPC4	6	160468924	160468924	Missense_Mutation	SNP	A	44	33	11	G	biallelic_het	NA	NA	NA	NA	NA
FGFR1OP	c.86T>C	p.V29A	NA	LAPC4	6	167412986	167412986	Missense_Mutation	SNP	T	38	29	9	C	multi_monoallelic	NA	NA	NA	NA	NA
FGFR1OP	c.650T>C	p.L217P	NA	LAPC4	6	167435967	167435967	Missense_Mutation	SNP	T	43	31	12	C	multi_monoallelic	NA	NA	NA	NA	NA
HOXA11	c.887A>G	p.E296G	NA	LAPC4	7	27222470	27222470	Missense_Mutation	SNP	T	31	12	19	C	monoallelic	NA	NA	NA	NA	NA
EGFR	c.2939T>A	p.V980D	1	LAPC4	7	55268099	55268099	Missense_Mutation	SNP	T	46	16	30	A	monoallelic	https://cancer.sanger.ac.uk/cosmic/mutation/overview?id=23273451	COSM6005629	COSV51777967	153076
SAMD9	c.1847G>A	p.G616D	NA	LAPC4	7	92733564	92733564	Missense_Mutation	SNP	C	42	19	23	T	monoallelic	NA	NA	NA	NA	NA
TRRAP	c.1181A>G	p.D394G	NA	LAPC4	7	98506416	98506416	Missense_Mutation	SNP	A	46	24	22	G	biallelic_het	NA	NA	NA	NA	NA
TRRAP	c.3261G>T	p.M1087I	NA	LAPC4	7	98527697	98527697	Missense_Mutation	SNP	G	50	24	26	T	biallelic_het	NA	NA	NA	NA	NA
TRRAP	c.6077C>T	p.P2026L	2	LAPC4	7	98554023	98554023	Missense_Mutation	SNP	C	42	22	20	T	biallelic_het	https://cancer.sanger.ac.uk/cosmic/mutation/overview?id=32057217	COSM238563	COSV62846705	38078
TRRAP	c.9520C>T	p.H3174Y	1	LAPC4	7	98586506	98586506	Missense_Mutation	SNP	C	40	15	25	T	biallelic_het	https://cancer.sanger.ac.uk/cosmic/mutation/overview?id=32059587	COSM6308786	COSV62844245	38078
TRRAP	c.10964C>T	p.A3655V	NA	LAPC4	7	98608742	98608742	Missense_Mutation	SNP	C	23	15	8	T	biallelic_het	NA	NA	NA	NA	NA
CUX1	c.3866C>T	p.A1289V	NA	LAPC4	7	101882810	101882810	Missense_Mutation	SNP	C	40	23	17	T	biallelic_het	NA	NA	NA	NA	NA
CUX1	c.4510A>G	p.K1504E	NA	LAPC4	7	101892281	101892281	Missense_Mutation	SNP	A	18	11	7	G	biallelic_het	NA	NA	NA	NA	NA
MET	c.3902C>G	p.P1301R	NA	LAPC4	7	116435758	116435758	Missense_Mutation	SNP	C	52	29	23	G	monoallelic	NA	NA	NA	NA	NA
KMT2C	c.10519C>T	p.R3507*	8	LAPC4	7	151860143	151860143	Nonsense_Mutation	SNP	G	57	30	27	A	biallelic_het	https://cancer.sanger.ac.uk/cosmic/mutation/overview?id=22725772	COSM5630942	COSV51418777	63101
KMT2C	c.10441C>A	p.Q3481K	NA	LAPC4	7	151860221	151860221	Missense_Mutation	SNP	G	57	25	32	T	biallelic_het	NA	NA	NA	NA	NA
KMT2C	c.8902G>A	p.A2968T	NA	LAPC4	7	151873636	151873636	Missense_Mutation	SNP	C	33	17	16	T	biallelic_het	NA	NA	NA	NA	NA
KMT2C	c.5687A>G	p.D1896G	NA	LAPC4	7	151879258	151879258	Missense_Mutation	SNP	T	46	25	21	C	biallelic_het	NA	NA	NA	NA	NA
KMT2C	c.3233G>A	p.C1078Y	NA	LAPC4	7	151921190	151921190	Missense_Mutation	SNP	C	43	16	27	T	biallelic_het	NA	NA	NA	NA	NA
KMT2C	c.62del	p.E21Gfs*84	NA	LAPC4	7	152132810	152132810	Frameshift_Indel	DEL	T	14	11	3	-	biallelic_het	NA	NA	NA	NA	NA
PCM1	c.4409A>T	p.D1470V	NA	LAPC4	8	17843595	17843595	Missense_Mutation	SNP	A	58	38	20	T	monoallelic	NA	NA	NA	NA	NA
WRN	c.15del	p.K5Nfs*15	NA	LAPC4	8	30915971	30915971	Frameshift_Indel	DEL	A	38	15	23	-	biallelic_het	NA	NA	NA	NA	NA
WRN	c.3382del	p.S1128Vfs*34	NA	LAPC4	8	31001132	31001132	Frameshift_Indel	DEL	A	40	30	10	-	biallelic_het	NA	NA	NA	NA	NA
CHD7	c.3919C>G	p.H1307D	NA	LAPC4	8	61748772	61748772	Missense_Mutation	SNP	C	42	8	34	G	monoallelic	NA	NA	NA	NA	NA
PREX2	c.3470A>C	p.K1157T	2	LAPC4	8	69031715	69031715	Missense_Mutation	SNP	A	30	6	24	C	monoallelic	https://cancer.sanger.ac.uk/cosmic/mutation/overview?id=25490255	COSM7449581	COSV99908973	40562
UBR5	c.7915G>A	p.A2639T	NA	LAPC4	8	103273415	103273415	Missense_Mutation	SNP	C	32	21	11	T	monoallelic	NA	NA	NA	NA	NA
RECQL4	c.2296del	p.X766_splice	NA	LAPC4	8	145738768	145738768	Splice_Site	DEL	G	33	0	33	-	biallelic_hom	NA	NA	NA	NA	NA
RECQL4	c.374G>A	p.R125H	NA	LAPC4	8	145742129	145742129	Missense_Mutation	SNP	C	40	23	17	T	biallelic_hom	NA	NA	NA	NA	NA
JAK2	c.701G>A	p.R234H	NA	LAPC4	9	5054649	5054649	Missense_Mutation	SNP	G	68	50	18	A	biallelic_het	NA	NA	NA	NA	NA
JAK2	c.739G>T	p.A247S	NA	LAPC4	9	5054687	5054687	Missense_Mutation	SNP	G	56	18	38	T	biallelic_het	NA	NA	NA	NA	NA
TAF1L	c.3626T>C	p.V1209A	NA	LAPC4	9	32631952	32631952	Missense_Mutation	SNP	A	50	31	19	G	monoallelic	NA	NA	NA	NA	NA
SYK	c.496dup	p.M166Nfs*14	NA	LAPC4	9	93607788	93607789	Frameshift_Indel	INS	-	44	10	34	A	biallelic_het	NA	NA	NA	NA	NA
SYK	c.707C>T	p.T236M	NA	LAPC4	9	93624616	93624616	Missense_Mutation	SNP	C	36	25	11	T	biallelic_het	NA	NA	NA	NA	NA
CNTRL	c.6398A>G	p.Y2133C	NA	LAPC4	9	123933807	123933807	Missense_Mutation	SNP	A	38	24	14	G	monoallelic	NA	NA	NA	NA	NA
ABL1	c.2690A>G	p.H897R	NA	LAPC4	9	133760310	133760310	Missense_Mutation	SNP	A	28	20	8	G	monoallelic	NA	NA	NA	NA	NA
NUP214	c.1255C>T	p.R419*	NA	LAPC4	9	134016058	134016058	Nonsense_Mutation	SNP	C	27	18	9	T	monoallelic	NA	NA	NA	NA	NA
BRD3	c.413C>T	p.A138V	NA	LAPC4	9	136916770	136916770	Missense_Mutation	SNP	G	27	6	21	A	monoallelic	NA	NA	NA	NA	NA
COL5A1	c.2167C>T	p.Q723*	NA	LAPC4	9	137658879	137658879	Nonsense_Mutation	SNP	C	16	8	8	T	multi_monoallelic	NA	NA	NA	NA	NA
COL5A1	c.4050del	p.G1351Efs*137	NA	LAPC4	9	137707451	137707451	Frameshift_Indel	DEL	C	36	17	19	-	multi_monoallelic	NA	NA	NA	NA	NA
NOTCH1	c.3829G>A	p.D1277N	NA	LAPC4	9	139401240	139401240	Missense_Mutation	SNP	C	34	8	26	T	multi_monoallelic	NA	NA	NA	NA	NA
NOTCH1	c.635G>A	p.G212D	NA	LAPC4	9	139417409	139417409	Missense_Mutation	SNP	C	48	16	32	T	multi_monoallelic	NA	NA	NA	NA	NA
DDX3X	n.3041-2A>T		NA	LAPC4	X	41217084	41217084	Splice_Site	SNP	A	6	0	6	T	biallelic_hom	NA	NA	NA	NA	NA
RBM10	c.1234T>C	p.W412R	NA	LAPC4	X	47039891	47039891	Missense_Mutation	SNP	T	10	0	10	C	biallelic_hom	NA	NA	NA	NA	NA
TFE3	c.1445del	p.G482Dfs*44	NA	LAPC4	X	48887952	48887952	Frameshift_Indel	DEL	C	26	4	22	-	monoallelic	NA	NA	NA	NA	NA
AR	c.237_239dup	p.Q80dup	14	LAPC4	X	66765158	66765159	Inframe_Indel	INS	-	4	0	4	GCA	biallelic_hom	https://cancer.sanger.ac.uk/cosmic/mutation/overview?id=38852311	COSM4603337	COSV65952534	58047
AR	c.2180G>A	p.R727H	3	LAPC4	X	66937326	66937326	Missense_Mutation	SNP	G	17	3	14	A	biallelic_hom	https://cancer.sanger.ac.uk/cosmic/mutation/overview?id=38863496	COSM6944526	COSV65958005	19969
ZMYM3	c.143del	p.P48Lfs*65	NA	LAPC4	X	70472963	70472963	Frameshift_Indel	DEL	G	12	1	11	-	biallelic_hom	NA	NA	NA	NA	NA
SMARCA1	c.565C>T	p.R189*	NA	LAPC4	X	128649729	128649729	Nonsense_Mutation	SNP	G	13	0	13	A	biallelic_hom	NA	NA	NA	NA	NA
TNFRSF14	c.253G>A	p.A85T	NA	LNCaP_Abl	1	2489856	2489856	Missense_Mutation	SNP	G	43	25	18	A	monoallelic	NA	NA	NA	NA	NA
PRDM16	c.1912G>T	p.G638C	NA	LNCaP_Abl	1	3328673	3328673	Missense_Mutation	SNP	G	54	27	27	T	multi_monoallelic	NA	NA	NA	NA	NA
PRDM16	c.2254A>G	p.K752E	NA	LNCaP_Abl	1	3329015	3329015	Missense_Mutation	SNP	A	64	36	28	G	multi_monoallelic	NA	NA	NA	NA	NA
RPL22	c.44del	p.K15Rfs*5	133	LNCaP_Abl	1	6257785	6257785	Frameshift_Indel	DEL	T	29	6	23	-	biallelic_hom	https://cancer.sanger.ac.uk/cosmic/mutation/overview?id=23549956	COSM179404	COSV52376836	38078	large_intestine/carcinoma/adenocarcinoma=68/2391=2.84%;stomach/carcinoma/intestinal_adenocarcinoma=12/97=12.37%;stomach/carcinoma/NS=22/559=3.94%;biliary_tract/carcinoma/NS=6/266=2.26%
CAMTA1	c.1121A>T	p.D374V	NA	LNCaP_Abl	1	7723728	7723728	Missense_Mutation	SNP	A	63	44	19	T	Noinfo	NA	NA	NA	NA	NA
CAMTA1	c.4927dup	p.I1643Nfs*17	NA	LNCaP_Abl	1	7812557	7812558	Frameshift_Indel	INS	-	41	29	12	A	Noinfo	NA	NA	NA	NA	NA
SPEN	c.3596T>C	p.V1199A	NA	LNCaP_Abl	1	16256331	16256331	Missense_Mutation	SNP	T	17	8	9	C	monoallelic	NA	NA	NA	NA	NA
ARID1A	c.854del	p.G285Efs*78	NA	LNCaP_Abl	1	27023744	27023744	Frameshift_Indel	DEL	G	42	14	28	-	monoallelic	NA	NA	NA	NA	NA
LCK	c.427G>T	p.A143S	NA	LNCaP_Abl	1	32741219	32741219	Missense_Mutation	SNP	G	26	13	13	T	monoallelic	NA	NA	NA	NA	NA
CSF3R	c.1404dup	p.S469Qfs*5	5	LNCaP_Abl	1	36935322	36935323	Frameshift_Indel	INS	-	27	14	13	G	monoallelic	https://cancer.sanger.ac.uk/cosmic/mutation/overview?id=38663813	COSM2081600	COSV58966317	60124
MPL	c.770G>A	p.R257H	2	LNCaP_Abl	1	43805714	43805714	Missense_Mutation	SNP	G	34	17	17	A	monoallelic	https://cancer.sanger.ac.uk/cosmic/mutation/overview?id=36966910	COSM2170440	COSV65244545	38078
TAL1	c.86del	p.P29Rfs*6	6	LNCaP_Abl	1	47691475	47691475	Frameshift_Indel	DEL	G	21	16	5	-	monoallelic	https://cancer.sanger.ac.uk/cosmic/mutation/overview?id=24215060	COSM2191681	COSV53745803	38078
STIL	c.2531C>T	p.S844L	NA	LNCaP_Abl	1	47735391	47735391	Missense_Mutation	SNP	G	28	17	11	A	monoallelic	NA	NA	NA	NA	NA
JAK1	c.1289dup	p.L431Vfs*22	18	LNCaP_Abl	1	65325832	65325833	Frameshift_Indel	INS	-	38	22	16	G	biallelic_het	https://cancer.sanger.ac.uk/cosmic/mutation/overview?id=29880993	COSM41842	COSV61087635	65273
JAK1	c.425del	p.K142Rfs*26	12	LNCaP_Abl	1	65339111	65339111	Frameshift_Indel	DEL	T	32	8	24	-	biallelic_het	https://cancer.sanger.ac.uk/cosmic/mutation/overview?id=29882237	COSM1639943	COSV61087645	65273
FUBP1	c.1919C>T	p.A640V	NA	LNCaP_Abl	1	78414847	78414847	Missense_Mutation	SNP	G	50	28	22	A	monoallelic	NA	NA	NA	NA	NA
ATP1A1	c.1424C>A	p.A475D	NA	LNCaP_Abl	1	116935567	116935567	Missense_Mutation	SNP	C	43	34	9	A	monoallelic	NA	NA	NA	NA	NA
NOTCH2	c.5311-1G>T	p.X1771_splice	NA	LNCaP_Abl	1	120463021	120463021	Splice_Site	SNP	C	69	46	23	A	biallelic_het	NA	NA	NA	NA	NA
NOTCH2	c.316T>C	p.S106P	NA	LNCaP_Abl	1	120548051	120548051	Missense_Mutation	SNP	A	80	71	9	G	biallelic_het	NA	NA	NA	NA	NA
BCL9	c.1523G>A	p.R508Q	NA	LNCaP_Abl	1	147091484	147091484	Missense_Mutation	SNP	G	45	20	25	A	multi_monoallelic	NA	NA	NA	NA	NA
BCL9	c.2065_2067del	p.S689del	NA	LNCaP_Abl	1	147092024	147092026	Inframe_Indel	DEL	CTT	41	23	18	-	multi_monoallelic	NA	NA	NA	NA	NA
SETDB1	c.2920G>A	p.E974K	NA	LNCaP_Abl	1	150933458	150933458	Missense_Mutation	SNP	G	39	17	22	A	monoallelic	NA	NA	NA	NA	NA
ETV3	c.1416del	p.K473Sfs*4	3	LNCaP_Abl	1	157094756	157094756	Frameshift_Indel	DEL	G	40	17	23	-	monoallelic	https://cancer.sanger.ac.uk/cosmic/mutation/overview?id=35912026	COSM1984959	COSV63864335	38078
SLC45A3	c.1103C>T	p.A368V	NA	LNCaP_Abl	1	205631110	205631110	Missense_Mutation	SNP	G	60	23	37	A	monoallelic	NA	NA	NA	NA	NA
ABI1	c.581G>A	p.R194Q	NA	LNCaP_Abl	10	27057919	27057919	Missense_Mutation	SNP	C	44	22	22	T	monoallelic	NA	NA	NA	NA	NA
RET	c.230G>A	p.R77H	2	LNCaP_Abl	10	43596063	43596063	Missense_Mutation	SNP	G	57	27	30	A	biallelic_het	https://cancer.sanger.ac.uk/cosmic/mutation/overview?id=33977950	COSM294752	COSV60688178	38078
RET	c.2573T>C	p.I858T	NA	LNCaP_Abl	10	43615159	43615159	Missense_Mutation	SNP	T	43	21	22	C	biallelic_het	NA	NA	NA	NA	NA
TET1	c.3436A>T	p.T1146S	NA	LNCaP_Abl	10	70405922	70405922	Missense_Mutation	SNP	A	26	14	12	T	multi_monoallelic	NA	NA	NA	NA	NA
TET1	c.3437C>A	p.T1146N	NA	LNCaP_Abl	10	70405923	70405923	Missense_Mutation	SNP	C	24	13	11	A	multi_monoallelic	NA	NA	NA	NA	NA
NUTM2D	c.325T>C	p.F109L	2	LNCaP_Abl	10	89120396	89120396	Missense_Mutation	SNP	T	18	0	18	C	biallelic_hom	https://cancer.sanger.ac.uk/cosmic/mutation/overview?id=48496950	COSM4591792	COSV67745869	38078
PTEN	c.17_18del	p.K6Rfs*4	NA	LNCaP_Abl	10	89624242	89624243	Frameshift_Indel	DEL	AA	14	0	14	-	biallelic_hom	NA	NA	NA	NA	NA
NFKB2	c.2068G>A	p.A690T	NA	LNCaP_Abl	10	104160803	104160803	Missense_Mutation	SNP	G	38	14	24	A	monoallelic	NA	NA	NA	NA	NA
NT5C2	c.583C>T	p.R195W	2	LNCaP_Abl	10	104859733	104859733	Missense_Mutation	SNP	G	20	14	6	A	monoallelic	https://cancer.sanger.ac.uk/cosmic/mutation/overview?id=31448939	COSM4011344	COSV58415584	38078
NUP98	c.536G>A	p.S179N	NA	LNCaP_Abl	11	3794929	3794929	Missense_Mutation	SNP	C	35	14	21	T	monoallelic	NA	NA	NA	NA	NA
PAX6	c.1166del	p.P389Hfs*7	NA	LNCaP_Abl	11	31812317	31812317	Frameshift_Indel	DEL	G	20	10	10	-	monoallelic	NA	NA	NA	NA	NA
MEN1	c.954T>A	p.Y318*	NA	LNCaP_Abl	11	64573814	64573814	Nonsense_Mutation	SNP	A	41	32	9	T	monoallelic	NA	NA	NA	NA	NA
BIRC3	c.905G>A	p.W302*	NA	LNCaP_Abl	11	102196248	102196248	Nonsense_Mutation	SNP	G	44	9	35	A	monoallelic	NA	NA	NA	NA	NA
ATM	c.4716G>T	p.K1572N	NA	LNCaP_Abl	11	108164144	108164144	Missense_Mutation	SNP	G	46	31	15	T	multi_monoallelic	NA	NA	NA	NA	NA
ATM	c.6976-2A>G	p.X2326_splice	NA	LNCaP_Abl	11	108198370	108198370	Splice_Site	SNP	A	46	33	13	G	multi_monoallelic	NA	NA	NA	NA	NA
USP28	c.2246C>A	p.A749D	NA	LNCaP_Abl	11	113679078	113679078	Missense_Mutation	SNP	G	54	16	38	T	monoallelic	NA	NA	NA	NA	NA
KMT2A	c.5780C>T	p.A1927V	NA	LNCaP_Abl	11	118368766	118368766	Missense_Mutation	SNP	C	43	32	11	T	biallelic_het	NA	NA	NA	NA	NA
KMT2A	c.9620G>T	p.R3207M	NA	LNCaP_Abl	11	118376227	118376227	Missense_Mutation	SNP	G	28	9	19	T	biallelic_het	NA	NA	NA	NA	NA
BCL9L	c.2656C>T	p.R886W	NA	LNCaP_Abl	11	118771796	118771796	Missense_Mutation	SNP	G	46	5	41	A	monoallelic	NA	NA	NA	NA	NA
KCNJ5	c.443C>T	p.T148I	NA	LNCaP_Abl	11	128781611	128781611	Missense_Mutation	SNP	C	34	7	27	T	monoallelic	NA	NA	NA	NA	NA
ADAMTS8	c.1745dup	p.D583*	NA	LNCaP_Abl	11	130281316	130281317	Frameshift_Indel	INS	-	47	39	8	G	multi_monoallelic	NA	NA	NA	NA	NA
ADAMTS8	c.62del	p.L21Rfs*55	NA	LNCaP_Abl	11	130298120	130298120	Frameshift_Indel	DEL	A	24	20	4	-	multi_monoallelic	NA	NA	NA	NA	NA
ADAMTS8	c.59_60del	p.L20Pfs*179	NA	LNCaP_Abl	11	130298122	130298123	Frameshift_Indel	DEL	CA	24	20	4	-	multi_monoallelic	NA	NA	NA	NA	NA
KDM5A	c.3597del	p.G1200Dfs*9	35	LNCaP_Abl	12	416953	416953	Frameshift_Indel	DEL	T	26	16	10	-	biallelic_het	https://cancer.sanger.ac.uk/cosmic/mutation/overview?id=44678327	COSM1180773	COSV66990113	54115	endometrium/carcinoma/endometrioid_carcinoma=4/95=4.21%
KDM5A	c.1906T>C	p.C636R	NA	LNCaP_Abl	12	438063	438063	Missense_Mutation	SNP	A	35	15	20	G	biallelic_het	NA	NA	NA	NA	NA
CHD4	c.2614G>A	p.V872M	NA	LNCaP_Abl	12	6702295	6702295	Missense_Mutation	SNP	C	31	11	20	T	monoallelic	NA	NA	NA	NA	NA
ETNK1	c.683+2T>C	p.X228_splice	NA	LNCaP_Abl	12	22796958	22796958	Splice_Site	SNP	T	27	16	11	C	monoallelic	NA	NA	NA	NA	NA
COL2A1	c.3641del	p.P1214Lfs*13	NA	LNCaP_Abl	12	48369345	48369345	Frameshift_Indel	DEL	G	50	38	12	-	monoallelic	NA	NA	NA	NA	NA
SMARCD1	c.872A>G	p.Q291R	NA	LNCaP_Abl	12	50483767	50483767	Missense_Mutation	SNP	A	31	14	17	G	monoallelic	NA	NA	NA	NA	NA
ERBB3	c.531G>T	p.K177N	NA	LNCaP_Abl	12	56480424	56480424	Missense_Mutation	SNP	G	49	20	29	T	monoallelic	NA	NA	NA	NA	NA
LRIG3	c.994C>A	p.L332I	NA	LNCaP_Abl	12	59281668	59281668	Missense_Mutation	SNP	G	40	19	21	T	monoallelic	NA	NA	NA	NA	NA
STAB2	c.449del	p.C150Lfs*26	NA	LNCaP_Abl	12	104015851	104015851	Frameshift_Indel	DEL	G	15	10	5	-	multi_monoallelic	NA	NA	NA	NA	NA
STAB2	c.4978C>T	p.R1660W	NA	LNCaP_Abl	12	104122669	104122669	Missense_Mutation	SNP	C	56	29	27	T	multi_monoallelic	NA	NA	NA	NA	NA
NCOR2	c.5509_5517dup	p.S1837_G1839dup	27	LNCaP_Abl	12	124824721	124824722	Inframe_Indel	INS	-	50	0	50	GCCGCTGCT	biallelic_hom	https://cancer.sanger.ac.uk/cosmic/mutation/overview?id=45371441	COSM1359887	COSV62292510	41645
NCOR2	c.3472C>T	p.P1158S	NA	LNCaP_Abl	12	124839395	124839395	Missense_Mutation	SNP	G	32	12	20	A	biallelic_hom	NA	NA	NA	NA	NA
NCOR2	c.1529_1531dup	p.Q510dup	12	LNCaP_Abl	12	124887058	124887059	Inframe_Indel	INS	-	46	36	10	GCT	biallelic_hom	https://cancer.sanger.ac.uk/cosmic/mutation/overview?id=45371257	COSM1476307	COSV62292713	38078	thyroid/other/neoplasm=4/15=26.67%
NCOR2	c.500T>C	p.L167P	3	LNCaP_Abl	12	124957589	124957589	Missense_Mutation	SNP	A	26	12	14	G	biallelic_hom	https://cancer.sanger.ac.uk/cosmic/mutation/overview?id=45379143	COSM2227173	COSV62295110	3567
FOXO1	c.281T>C	p.V94A	NA	LNCaP_Abl	13	41240069	41240069	Missense_Mutation	SNP	A	9	4	5	G	monoallelic	NA	NA	NA	NA	NA
ERCC5	c.1258C>A	p.R420S	NA	LNCaP_Abl	13	103514757	103514757	Missense_Mutation	SNP	C	37	29	8	A	monoallelic	NA	NA	NA	NA	NA
NIN	c.2893G>A	p.A965T	NA	LNCaP_Abl	14	51224855	51224855	Missense_Mutation	SNP	C	38	16	22	T	multi_monoallelic	NA	NA	NA	NA	NA
NIN	c.2750A>G	p.Q917R	NA	LNCaP_Abl	14	51224998	51224998	Missense_Mutation	SNP	T	42	22	20	C	multi_monoallelic	NA	NA	NA	NA	NA
RAD51B	c.52C>T	p.R18C	NA	LNCaP_Abl	14	68290312	68290312	Missense_Mutation	SNP	C	47	20	27	T	monoallelic	NA	NA	NA	NA	NA
TSHR	c.801G>T	p.L267F	NA	LNCaP_Abl	14	81606131	81606131	Missense_Mutation	SNP	G	36	21	15	T	monoallelic	NA	NA	NA	NA	NA
TRIP11	c.2588A>T	p.N863I	NA	LNCaP_Abl	14	92471732	92471732	Missense_Mutation	SNP	T	29	11	18	A	monoallelic	NA	NA	NA	NA	NA
TCL1A	c.34A>G	p.T12A	NA	LNCaP_Abl	14	96180370	96180370	Missense_Mutation	SNP	T	40	19	21	C	monoallelic	NA	NA	NA	NA	NA
MGA	c.16C>T	p.Q6*	NA	LNCaP_Abl	15	41961108	41961108	Nonsense_Mutation	SNP	C	30	15	15	T	biallelic_het	NA	NA	NA	NA	NA
MGA	c.5198T>C	p.V1733A	NA	LNCaP_Abl	15	42035356	42035356	Missense_Mutation	SNP	T	36	23	13	C	biallelic_het	NA	NA	NA	NA	NA
MGA	c.5579C>T	p.A1860V	NA	LNCaP_Abl	15	42041384	42041384	Missense_Mutation	SNP	C	40	23	17	T	biallelic_het	NA	NA	NA	NA	NA
MGA	c.5704C>A	p.L1902M	NA	LNCaP_Abl	15	42041509	42041509	Missense_Mutation	SNP	C	52	29	23	A	biallelic_het	NA	NA	NA	NA	NA
MGA	c.6202G>T	p.E2068*	NA	LNCaP_Abl	15	42042007	42042007	Nonsense_Mutation	SNP	G	20	10	10	T	biallelic_het	NA	NA	NA	NA	NA
CRTC3	c.700-1G>T	p.X234_splice	NA	LNCaP_Abl	15	91162972	91162972	Splice_Site	SNP	G	39	24	15	T	monoallelic	NA	NA	NA	NA	NA
CREBBP	c.329C>T	p.A110V	NA	LNCaP_Abl	16	3900767	3900767	Missense_Mutation	SNP	G	61	32	29	A	monoallelic	NA	NA	NA	NA	NA
PPL	c.4622A>G	p.E1541G	NA	LNCaP_Abl	16	4934034	4934034	Missense_Mutation	SNP	T	17	4	13	C	monoallelic	NA	NA	NA	NA	NA
GRIN2A	c.619_634del	p.D207Mfs*8	NA	LNCaP_Abl	16	10032189	10032204	Frameshift_Indel	DEL	CCTCAAAGGAAGTGTC	27	14	13	-	monoallelic	NA	NA	NA	NA	NA
CYLD	c.1110A>T	p.K370N	NA	LNCaP_Abl	16	50811824	50811824	Missense_Mutation	SNP	A	41	22	19	T	monoallelic	NA	NA	NA	NA	NA
CDH1	c.2098C>T	p.P700S	2	LNCaP_Abl	16	68857463	68857463	Missense_Mutation	SNP	C	28	21	7	T	monoallelic	https://cancer.sanger.ac.uk/cosmic/mutation/overview?id=21999414	COSM3271910	COSV55729365	30667
USP6	c.1953G>T	p.K651N	NA	LNCaP_Abl	17	5048119	5048119	Missense_Mutation	SNP	G	30	9	21	T	monoallelic	NA	NA	NA	NA	NA
PER1	c.3291C>A	p.Y1097*	NA	LNCaP_Abl	17	8045745	8045745	Nonsense_Mutation	SNP	G	31	17	14	T	monoallelic	NA	NA	NA	NA	NA
GAS7	c.1051G>T	p.E351*	NA	LNCaP_Abl	17	9828880	9828880	Nonsense_Mutation	SNP	C	32	16	16	A	monoallelic	NA	NA	NA	NA	NA
NF1	c.1292C>T	p.A431V	NA	LNCaP_Abl	17	29533289	29533289	Missense_Mutation	SNP	C	32	16	16	T	multi_monoallelic	NA	NA	NA	NA	NA
NF1	c.2069C>T	p.A690V	NA	LNCaP_Abl	17	29553520	29553520	Missense_Mutation	SNP	C	31	15	16	T	multi_monoallelic	NA	NA	NA	NA	NA
STAT5B	c.1025T>C	p.L342P	1	LNCaP_Abl	17	40370313	40370313	Missense_Mutation	SNP	A	44	23	21	G	monoallelic	https://cancer.sanger.ac.uk/cosmic/mutation/overview?id=20176297	COSM6005724	COSV53185893	15671
SPOP	c.345A>C	p.K115N	NA	LNCaP_Abl	17	47696603	47696603	Missense_Mutation	SNP	T	41	17	24	G	monoallelic	NA	NA	NA	NA	NA
BRIP1	c.965A>G	p.Q322R	NA	LNCaP_Abl	17	59878789	59878789	Missense_Mutation	SNP	T	53	37	16	C	monoallelic	NA	NA	NA	NA	NA
PRKAR1A	c.47G>A	p.R16Q	5	LNCaP_Abl	17	66511587	66511587	Missense_Mutation	SNP	G	41	17	24	A	monoallelic	https://cancer.sanger.ac.uk/cosmic/mutation/overview?id=89897201	COSM2975001	COSV62235272	56063
H3F3B	c.400G>T	p.E134*	NA	LNCaP_Abl	17	73774687	73774687	Nonsense_Mutation	SNP	C	26	14	12	A	monoallelic	NA	NA	NA	NA	NA
UNC13D	c.842A>G	p.Q281R	NA	LNCaP_Abl	17	73836322	73836322	Missense_Mutation	SNP	T	28	17	11	C	monoallelic	NA	NA	NA	NA	NA
RNF213	c.8938G>A	p.A2980T	NA	LNCaP_Abl	17	78321073	78321073	Missense_Mutation	SNP	G	25	13	12	A	monoallelic	NA	NA	NA	NA	NA
SETBP1	c.1654G>A	p.D552N	NA	LNCaP_Abl	18	42530959	42530959	Missense_Mutation	SNP	G	35	5	30	A	monoallelic	NA	NA	NA	NA	NA
MBD1	c.53G>A	p.R18H	NA	LNCaP_Abl	18	47806310	47806310	Missense_Mutation	SNP	C	35	16	19	T	monoallelic	NA	NA	NA	NA	NA
MALT1	c.377-1G>A	p.X126_splice	NA	LNCaP_Abl	18	56363597	56363597	Splice_Site	SNP	G	8	2	6	A	monoallelic	NA	NA	NA	NA	NA
BCL2	c.251C>A	p.P84H	NA	LNCaP_Abl	18	60985649	60985649	Missense_Mutation	SNP	G	26	17	9	T	monoallelic	NA	NA	NA	NA	NA
GNA11	c.439C>T	p.R147C	2	LNCaP_Abl	19	3113445	3113445	Missense_Mutation	SNP	C	17	9	8	T	monoallelic	https://cancer.sanger.ac.uk/cosmic/mutation/overview?id=21239332	COSM2750391	COSV50019275	62728
COL5A3	c.3202G>T	p.A1068S	NA	LNCaP_Abl	19	10088073	10088073	Missense_Mutation	SNP	C	44	29	15	A	monoallelic	NA	NA	NA	NA	NA
KEAP1	c.763T>C	p.Y255H	NA	LNCaP_Abl	19	10602815	10602815	Missense_Mutation	SNP	A	43	23	20	G	monoallelic	NA	NA	NA	NA	NA
LYL1	c.794C>T	p.A265V	NA	LNCaP_Abl	19	13210182	13210182	Missense_Mutation	SNP	G	31	15	16	A	monoallelic	NA	NA	NA	NA	NA
AKT2	c.1333G>A	p.A445T	NA	LNCaP_Abl	19	40740985	40740985	Missense_Mutation	SNP	C	30	24	6	T	monoallelic	NA	NA	NA	NA	NA
ERF	c.896del	p.G299Efs*12	NA	LNCaP_Abl	19	42753368	42753368	Frameshift_Indel	DEL	C	18	10	8	-	monoallelic	NA	NA	NA	NA	NA
CIC	c.1606G>A	p.A536T	NA	LNCaP_Abl	19	42777541	42777541	Missense_Mutation	SNP	G	11	6	5	A	biallelic_het	NA	NA	NA	NA	NA
CIC	c.3335C>T	p.S1112F	NA	LNCaP_Abl	19	42796877	42796877	Missense_Mutation	SNP	C	20	8	12	T	biallelic_het	NA	NA	NA	NA	NA
BCL3	c.4C>T	p.P2S	NA	LNCaP_Abl	19	45252051	45252051	Missense_Mutation	SNP	C	18	7	11	T	monoallelic	NA	NA	NA	NA	NA
BAX	c.121del	p.E41Rfs*19	58	LNCaP_Abl	19	49458971	49458971	Frameshift_Indel	DEL	G	14	1	13	-	biallelic_hom	https://cancer.sanger.ac.uk/cosmic/mutation/overview?id=20172093	COSM309434	COSV53168804	38078	biliary_tract/carcinoma/NS=4/266=1.5%;large_intestine/carcinoma/adenocarcinoma=41/2391=1.71%
TRPM4	c.3221C>T	p.A1074V	NA	LNCaP_Abl	19	49713555	49713555	Missense_Mutation	SNP	C	49	28	21	T	monoallelic	NA	NA	NA	NA	NA
POLD1	c.1602G>T	p.E534D	NA	LNCaP_Abl	19	50910347	50910347	Missense_Mutation	SNP	G	52	24	28	T	monoallelic	NA	NA	NA	NA	NA
CNOT3	c.977G>C	p.G326A	NA	LNCaP_Abl	19	54651965	54651965	Missense_Mutation	SNP	G	43	29	14	C	monoallelic	NA	NA	NA	NA	NA
DNMT3A	c.1138G>A	p.A380T	4	LNCaP_Abl	2	25469630	25469630	Missense_Mutation	SNP	C	47	19	28	T	multi_monoallelic	https://cancer.sanger.ac.uk/cosmic/mutation/overview?id=23911799	COSM1204298	COSV53050639	81193
DNMT3A	c.320C>T	p.A107V	1	LNCaP_Abl	2	25505438	25505438	Missense_Mutation	SNP	G	39	21	18	A	multi_monoallelic	https://cancer.sanger.ac.uk/cosmic/mutation/overview?id=23929718	COSM2911854	COSV53057010	38078
ALK	c.4130C>T	p.A1377V	NA	LNCaP_Abl	2	29419670	29419670	Missense_Mutation	SNP	G	47	24	23	A	monoallelic	NA	NA	NA	NA	NA
FBXO11	c.2479G>T	p.E827*	NA	LNCaP_Abl	2	48036373	48036373	Nonsense_Mutation	SNP	C	12	0	12	A	biallelic_hom	NA	NA	NA	NA	NA
AFF3	c.1429dup	p.H477Pfs*8	NA	LNCaP_Abl	2	100217913	100217914	Frameshift_Indel	INS	-	26	11	15	G	monoallelic	NA	NA	NA	NA	NA
ERCC3	c.2218G>A	p.A740T	1	LNCaP_Abl	2	128015303	128015303	Missense_Mutation	SNP	C	42	21	21	T	biallelic_het	https://cancer.sanger.ac.uk/cosmic/mutation/overview?id=20349119	COSM3042188	COSV53427508	14776
ERCC3	c.1171C>T	p.R391W	1	LNCaP_Abl	2	128044450	128044450	Missense_Mutation	SNP	G	37	27	10	A	biallelic_het	https://cancer.sanger.ac.uk/cosmic/mutation/overview?id=20348879	COSM3042203	COSV53427536	38078
LRP1B	c.8288C>T	p.A2763V	1	LNCaP_Abl	2	141267607	141267607	Missense_Mutation	SNP	G	52	26	26	A	multi_monoallelic	https://cancer.sanger.ac.uk/cosmic/mutation/overview?id=41590342	COSM3117331	COSV67229831	38078
LRP1B	c.8258A>G	p.D2753G	NA	LNCaP_Abl	2	141272233	141272233	Missense_Mutation	SNP	T	35	20	15	C	multi_monoallelic	NA	NA	NA	NA	NA
ACVR2A	c.1310del	p.K437Rfs*5	NA	LNCaP_Abl	2	148683686	148683686	Frameshift_Indel	DEL	A	25	16	9	-	monoallelic	NA	NA	NA	NA	NA
HOXD11	c.937T>C	p.W313R	NA	LNCaP_Abl	2	176973790	176973790	Missense_Mutation	SNP	T	25	13	12	C	monoallelic	NA	NA	NA	NA	NA
SF3B1	c.314C>T	p.A105V	NA	LNCaP_Abl	2	198285253	198285253	Missense_Mutation	SNP	G	36	17	19	A	monoallelic	NA	NA	NA	NA	NA
ATIC	c.1673A>T	p.Y558F	NA	LNCaP_Abl	2	216214272	216214272	Missense_Mutation	SNP	A	40	9	31	T	monoallelic	NA	NA	NA	NA	NA
CHD6	c.4396G>T	p.G1466C	NA	LNCaP_Abl	20	40052291	40052291	Missense_Mutation	SNP	C	30	17	13	A	monoallelic	NA	NA	NA	NA	NA
PTPRT	c.2714A>G	p.D905G	NA	LNCaP_Abl	20	40770611	40770611	Missense_Mutation	SNP	T	33	13	20	C	biallelic_het	NA	NA	NA	NA	NA
PTPRT	c.2584del	p.R862Gfs*20	NA	LNCaP_Abl	20	40790090	40790090	Frameshift_Indel	DEL	G	29	11	18	-	biallelic_het	NA	NA	NA	NA	NA
NFATC2	c.2598G>T	p.Q866H	NA	LNCaP_Abl	20	50048728	50048728	Missense_Mutation	SNP	C	41	25	16	A	biallelic_het	NA	NA	NA	NA	NA
NFATC2	c.1315G>T	p.G439C	NA	LNCaP_Abl	20	50133340	50133340	Missense_Mutation	SNP	C	34	16	18	A	biallelic_het	NA	NA	NA	NA	NA
GNAS	c.1840C>T	p.Q614*	NA	LNCaP_Abl	20	57430160	57430160	Nonsense_Mutation	SNP	C	25	12	13	T	monoallelic	NA	NA	NA	NA	NA
BCR	c.2596A>C	p.K866Q	NA	LNCaP_Abl	22	23630353	23630353	Missense_Mutation	SNP	A	32	17	15	C	monoallelic	NA	NA	NA	NA	NA
MN1	c.3528del	p.L1177*	NA	LNCaP_Abl	22	28193004	28193004	Frameshift_Indel	DEL	C	23	7	16	-	multi_monoallelic	NA	NA	NA	NA	NA
MN1	c.2255G>A	p.G752D	NA	LNCaP_Abl	22	28194277	28194277	Missense_Mutation	SNP	C	26	5	21	T	multi_monoallelic	NA	NA	NA	NA	NA
CHEK2	c.1289C>A	p.T430N	NA	LNCaP_Abl	22	29091797	29091797	Missense_Mutation	SNP	G	33	15	18	T	monoallelic	NA	NA	NA	NA	NA
PATZ1	c.1595T>A	p.I532N	NA	LNCaP_Abl	22	31724823	31724823	Missense_Mutation	SNP	A	43	23	20	T	monoallelic	NA	NA	NA	NA	NA
FANCD2	c.356G>A	p.R119H	NA	LNCaP_Abl	3	10076461	10076461	Missense_Mutation	SNP	G	39	20	19	A	monoallelic	NA	NA	NA	NA	NA
CTNNB1	c.677A>G	p.E226G	NA	LNCaP_Abl	3	41267006	41267006	Missense_Mutation	SNP	A	39	31	8	G	multi_monoallelic	NA	NA	NA	NA	NA
CTNNB1	c.2036C>T	p.T679I	NA	LNCaP_Abl	3	41278160	41278160	Missense_Mutation	SNP	C	35	21	14	T	multi_monoallelic	NA	NA	NA	NA	NA
SETD2	c.4953del	p.F1651Lfs*12	NA	LNCaP_Abl	3	47143010	47143010	Frameshift_Indel	DEL	A	11	6	5	-	multi_monoallelic	NA	NA	NA	NA	NA
SETD2	c.419G>A	p.G140D	NA	LNCaP_Abl	3	47165707	47165707	Missense_Mutation	SNP	C	41	17	24	T	multi_monoallelic	NA	NA	NA	NA	NA
DHX30	c.530del	p.G177Dfs*9	NA	LNCaP_Abl	3	47882526	47882526	Frameshift_Indel	DEL	G	35	18	17	-	monoallelic	NA	NA	NA	NA	NA
RHOA	c.101A>G	p.Y34C	NA	LNCaP_Abl	3	49412922	49412922	Missense_Mutation	SNP	T	33	16	17	C	monoallelic	NA	NA	NA	NA	NA
CACNA1D	c.5689G>C	p.D1897H	NA	LNCaP_Abl	3	53839053	53839053	Missense_Mutation	SNP	G	35	14	21	C	monoallelic	NA	NA	NA	NA	NA
TBL1XR1	c.1108G>A	p.D370N	3	LNCaP_Abl	3	176755900	176755900	Missense_Mutation	SNP	C	50	20	30	T	biallelic_het	https://cancer.sanger.ac.uk/cosmic/mutation/overview?id=54821924	COSM1420704	COSV70501537	38078
TBL1XR1	c.377dup	p.N126Kfs*19	1	LNCaP_Abl	3	176769341	176769342	Frameshift_Indel	INS	-	29	19	10	T	biallelic_het	https://cancer.sanger.ac.uk/cosmic/mutation/overview?id=54822441	COSM3205542	COSV61790790	38078
MAP3K13	c.24T>A	p.C8*	NA	LNCaP_Abl	3	185047018	185047018	Nonsense_Mutation	SNP	T	27	10	17	A	monoallelic	NA	NA	NA	NA	NA
ETV5	c.1448T>A	p.L483Q	NA	LNCaP_Abl	3	185766513	185766513	Missense_Mutation	SNP	A	55	37	18	T	monoallelic	NA	NA	NA	NA	NA
FGFR3	c.1634del	p.G545Afs*83	NA	LNCaP_Abl	4	1807377	1807377	Frameshift_Indel	DEL	G	43	31	12	-	monoallelic	NA	NA	NA	NA	NA
PDS5A	c.821C>A	p.A274D	NA	LNCaP_Abl	4	39918723	39918723	Missense_Mutation	SNP	G	29	14	15	T	monoallelic	NA	NA	NA	NA	NA
LEF1	c.730C>T	p.H244Y	NA	LNCaP_Abl	4	109000763	109000763	Missense_Mutation	SNP	G	36	20	16	A	monoallelic	NA	NA	NA	NA	NA
FAT4	c.127G>A	p.A43T	NA	LNCaP_Abl	4	126237693	126237693	Missense_Mutation	SNP	G	64	37	27	A	multi_monoallelic	NA	NA	NA	NA	NA
FAT4	c.12334A>G	p.I4112V	NA	LNCaP_Abl	4	126398350	126398350	Missense_Mutation	SNP	A	23	14	9	G	multi_monoallelic	NA	NA	NA	NA	NA
TERT	c.2593C>T	p.R865C	NA	LNCaP_Abl	5	1266640	1266640	Missense_Mutation	SNP	G	32	18	14	A	monoallelic	NA	NA	NA	NA	NA
IL6ST	c.754G>A	p.V252I	1	LNCaP_Abl	5	55259239	55259239	Missense_Mutation	SNP	C	34	16	18	T	monoallelic	https://cancer.sanger.ac.uk/cosmic/mutation/overview?id=40591533	COSM6005662	COSV61142931	2017
PIK3R1	c.1915C>T	p.R639*	9	LNCaP_Abl	5	67592099	67592099	Nonsense_Mutation	SNP	C	33	17	16	T	monoallelic	https://cancer.sanger.ac.uk/cosmic/mutation/overview?id=74010580	COSM3071985	COSV57126125	68086
CHD1	c.929dup	p.N310Kfs*12	NA	LNCaP_Abl	5	98235339	98235340	Frameshift_Indel	INS	-	31	17	14	T	monoallelic	NA	NA	NA	NA	NA
APC	c.8140C>T	p.R2714C	NA	LNCaP_Abl	5	112179431	112179431	Missense_Mutation	SNP	C	31	22	9	T	monoallelic	NA	NA	NA	NA	NA
ITK	c.1155G>T	p.K385N	3	LNCaP_Abl	5	156670727	156670727	Missense_Mutation	SNP	G	44	15	29	T	monoallelic	https://cancer.sanger.ac.uk/cosmic/mutation/overview?id=51356214	COSM3246297	COSV70060822	1627
FLT4	c.3272A>G	p.Y1091C	NA	LNCaP_Abl	5	180041127	180041127	Missense_Mutation	SNP	T	60	37	23	C	monoallelic	NA	NA	NA	NA	NA
IRF4	c.918G>T	p.K306N	NA	LNCaP_Abl	6	401596	401596	Missense_Mutation	SNP	G	40	23	17	T	monoallelic	NA	NA	NA	NA	NA
DAXX	c.1451A>G	p.E484G	NA	LNCaP_Abl	6	33287802	33287802	Missense_Mutation	SNP	T	26	12	14	C	monoallelic	NA	NA	NA	NA	NA
HMGA1	c.209C>A	p.A70D	NA	LNCaP_Abl	6	34210562	34210562	Missense_Mutation	SNP	C	43	25	18	A	monoallelic	NA	NA	NA	NA	NA
ZNF292	c.164G>A	p.C55Y	NA	LNCaP_Abl	6	87865473	87865473	Missense_Mutation	SNP	G	27	15	12	A	biallelic_hom	NA	NA	NA	NA	NA
ZNF292	c.5471A>G	p.N1824S	1	LNCaP_Abl	6	87968818	87968818	Missense_Mutation	SNP	A	23	9	14	G	biallelic_hom	https://cancer.sanger.ac.uk/cosmic/mutation/overview?id=37108884	COSM9068665	COSV100370479	38078
ZNF292	c.7796T>A	p.L2599H	NA	LNCaP_Abl	6	87971143	87971143	Missense_Mutation	SNP	T	14	0	14	A	biallelic_hom	NA	NA	NA	NA	NA
LATS1	c.563A>G	p.Q188R	NA	LNCaP_Abl	6	150005662	150005662	Missense_Mutation	SNP	T	34	22	12	C	monoallelic	NA	NA	NA	NA	NA
ARID1B	c.1243del	p.A415Pfs*15	NA	LNCaP_Abl	6	157100302	157100302	Frameshift_Indel	DEL	G	10	6	4	-	multi_monoallelic	NA	NA	NA	NA	NA
ARID1B	c.6490G>T	p.E2164*	NA	LNCaP_Abl	6	157528765	157528765	Nonsense_Mutation	SNP	G	50	28	22	T	multi_monoallelic	NA	NA	NA	NA	NA
ETV1	c.620G>A	p.G207E	NA	LNCaP_Abl	7	13971309	13971309	Missense_Mutation	SNP	C	42	28	14	T	monoallelic	NA	NA	NA	NA	NA
HOXA11	c.226del	p.R76Afs*219	NA	LNCaP_Abl	7	27224538	27224538	Frameshift_Indel	DEL	G	44	20	24	-	monoallelic	NA	NA	NA	NA	NA
SBDS	c.136G>T	p.D46Y	NA	LNCaP_Abl	7	66459321	66459321	Missense_Mutation	SNP	C	37	14	23	A	monoallelic	NA	NA	NA	NA	NA
HIP1	c.2732C>T	p.A911V	NA	LNCaP_Abl	7	75174027	75174027	Missense_Mutation	SNP	G	52	33	19	A	biallelic_het	NA	NA	NA	NA	NA
HIP1	c.628C>T	p.R210C	NA	LNCaP_Abl	7	75203183	75203183	Missense_Mutation	SNP	G	44	24	20	A	biallelic_het	NA	NA	NA	NA	NA
TRRAP	c.1508T>C	p.V503A	NA	LNCaP_Abl	7	98507836	98507836	Missense_Mutation	SNP	T	15	10	5	C	biallelic_het	NA	NA	NA	NA	NA
TRRAP	c.7169G>A	p.R2390Q	NA	LNCaP_Abl	7	98564677	98564677	Missense_Mutation	SNP	G	23	14	9	A	biallelic_het	NA	NA	NA	NA	NA
TRRAP	c.7993C>T	p.R2665W	2	LNCaP_Abl	7	98574160	98574160	Missense_Mutation	SNP	C	44	21	23	T	biallelic_het	https://cancer.sanger.ac.uk/cosmic/mutation/overview?id=32062076	COSM1093666	COSV62839851	38078
CUX1	c.4101G>T	p.K1367N	NA	LNCaP_Abl	7	101891872	101891872	Missense_Mutation	SNP	G	35	17	18	T	monoallelic	NA	NA	NA	NA	NA
MET	c.3118C>T	p.R1040*	NA	LNCaP_Abl	7	116414970	116414970	Nonsense_Mutation	SNP	C	35	21	14	T	monoallelic	NA	NA	NA	NA	NA
SMO	c.817T>C	p.C273R	NA	LNCaP_Abl	7	128845520	128845520	Missense_Mutation	SNP	T	31	14	17	C	monoallelic	NA	NA	NA	NA	NA
TRIM24	c.982C>A	p.L328M	NA	LNCaP_Abl	7	138213961	138213961	Missense_Mutation	SNP	C	33	13	20	A	monoallelic	NA	NA	NA	NA	NA
BRAF	c.721del	p.T241Rfs*5	NA	LNCaP_Abl	7	140501351	140501351	Frameshift_Indel	DEL	T	45	31	14	-	monoallelic	NA	NA	NA	NA	NA
EZH2	c.203T>C	p.V68A	NA	LNCaP_Abl	7	148543605	148543605	Missense_Mutation	SNP	A	33	17	16	G	monoallelic	NA	NA	NA	NA	NA
KMT2C	c.13488del	p.F4496Lfs*21	15	LNCaP_Abl	7	151845524	151845524	Frameshift_Indel	DEL	A	43	24	19	-	biallelic_het	https://cancer.sanger.ac.uk/cosmic/mutation/overview?id=22733289	COSM1181043	COSV51394086	63101
KMT2C	c.12425T>C	p.L4142S	NA	LNCaP_Abl	7	151849891	151849891	Missense_Mutation	SNP	A	49	22	27	G	biallelic_het	NA	NA	NA	NA	NA
KMT2C	c.8390dup	p.E2798Gfs*11	6	LNCaP_Abl	7	151874147	151874148	Frameshift_Indel	INS	-	27	11	16	T	biallelic_het	https://cancer.sanger.ac.uk/cosmic/mutation/overview?id=22726200	COSM1449419	COSV51280692	38078
KMT2C	c.5369C>T	p.S1790F	NA	LNCaP_Abl	7	151879576	151879576	Missense_Mutation	SNP	G	33	15	18	A	biallelic_het	NA	NA	NA	NA	NA
NRG1	c.1834C>A	p.L612M	NA	LNCaP_Abl	8	32621816	32621816	Missense_Mutation	SNP	C	26	16	10	A	monoallelic	NA	NA	NA	NA	NA
KAT6A	c.5804G>T	p.S1935I	NA	LNCaP_Abl	8	41789934	41789934	Missense_Mutation	SNP	C	54	24	30	A	biallelic_het	NA	NA	NA	NA	NA
KAT6A	c.2135G>A	p.S712N	NA	LNCaP_Abl	8	41801359	41801359	Missense_Mutation	SNP	C	41	18	23	T	biallelic_het	NA	NA	NA	NA	NA
HOOK3	c.1444G>A	p.E482K	NA	LNCaP_Abl	8	42841850	42841850	Missense_Mutation	SNP	G	32	18	14	A	monoallelic	NA	NA	NA	NA	NA
CHD7	c.3059dup	p.L1020Ffs*33	1	LNCaP_Abl	8	61735157	61735158	Frameshift_Indel	INS	-	45	35	10	T	monoallelic	https://cancer.sanger.ac.uk/cosmic/mutation/overview?id=51290864	COSM8212187	COSV101418073	38078
EXT1	c.2146C>G	p.P716A	NA	LNCaP_Abl	8	118812046	118812046	Missense_Mutation	SNP	G	59	36	23	C	multi_monoallelic	NA	NA	NA	NA	NA
EXT1	c.1935G>T	p.M645I	NA	LNCaP_Abl	8	118817081	118817081	Missense_Mutation	SNP	C	72	43	29	A	multi_monoallelic	NA	NA	NA	NA	NA
MYC	c.134A>G	p.N45S	2	LNCaP_Abl	8	128750597	128750597	Missense_Mutation	SNP	A	52	26	26	G	monoallelic	https://cancer.sanger.ac.uk/cosmic/mutation/overview?id=38683930	COSM3316855	COSV52382592	38078
RECQL4	c.2296del	p.X766_splice	NA	LNCaP_Abl	8	145738768	145738768	Splice_Site	DEL	G	61	0	61	-	biallelic_hom	NA	NA	NA	NA	NA
CD274	c.164T>C	p.V55A	NA	LNCaP_Abl	9	5457190	5457190	Missense_Mutation	SNP	T	41	30	11	C	monoallelic	NA	NA	NA	NA	NA
COL15A1	c.3727G>A	p.A1243T	NA	LNCaP_Abl	9	101829239	101829239	Missense_Mutation	SNP	G	24	18	6	A	monoallelic	NA	NA	NA	NA	NA
NR4A3	c.995A>G	p.Q332R	3	LNCaP_Abl	9	102594981	102594981	Missense_Mutation	SNP	A	16	4	12	G	monoallelic	https://cancer.sanger.ac.uk/cosmic/mutation/overview?id=28681367	COSM3166798	COSV58243849	388
CNTRL	c.5164_5165insT	p.R1722Mfs*4	NA	LNCaP_Abl	9	123924208	123924209	Frameshift_Indel	INS	-	21	8	13	T	monoallelic	NA	NA	NA	NA	NA
ABL1	c.2020G>A	p.D674N	NA	LNCaP_Abl	9	133759640	133759640	Missense_Mutation	SNP	G	21	15	6	A	multi_monoallelic	NA	NA	NA	NA	NA
ABL1	c.2366A>G	p.N789S	NA	LNCaP_Abl	9	133759986	133759986	Missense_Mutation	SNP	A	21	18	3	G	multi_monoallelic	NA	NA	NA	NA	NA
NUP214	c.1721C>T	p.P574L	NA	LNCaP_Abl	9	134020093	134020093	Missense_Mutation	SNP	C	26	15	11	T	biallelic_het	NA	NA	NA	NA	NA
NUP214	c.6060C>A	p.S2020R	NA	LNCaP_Abl	9	134103704	134103704	Missense_Mutation	SNP	C	27	10	17	A	biallelic_het	NA	NA	NA	NA	NA
TSC1	c.439G>T	p.G147W	NA	LNCaP_Abl	9	135798804	135798804	Missense_Mutation	SNP	C	25	12	13	A	monoallelic	NA	NA	NA	NA	NA
BRD3	c.89G>A	p.S30N	NA	LNCaP_Abl	9	136918511	136918511	Missense_Mutation	SNP	C	15	11	4	T	monoallelic	NA	NA	NA	NA	NA
COL5A1	c.2570C>A	p.P857H	NA	LNCaP_Abl	9	137676920	137676920	Missense_Mutation	SNP	C	26	17	9	A	multi_monoallelic	NA	NA	NA	NA	NA
COL5A1	c.2828G>A	p.G943D	NA	LNCaP_Abl	9	137688248	137688248	Missense_Mutation	SNP	G	26	15	11	A	multi_monoallelic	NA	NA	NA	NA	NA
NOTCH1	c.2917G>A	p.A973T	NA	LNCaP_Abl	9	139404237	139404237	Missense_Mutation	SNP	C	24	15	9	T	monoallelic	NA	NA	NA	NA	NA
KDM6A	c.1517A>G	p.Q506R	NA	LNCaP_Abl	X	44921983	44921983	Missense_Mutation	SNP	A	20	14	6	G	monoallelic	NA	NA	NA	NA	NA
WAS	c.700A>G	p.S234G	NA	LNCaP_Abl	X	48545310	48545310	Missense_Mutation	SNP	A	20	10	10	G	monoallelic	NA	NA	NA	NA	NA
KDM5C	c.4018A>T	p.S1340C	NA	LNCaP_Abl	X	53223341	53223341	Missense_Mutation	SNP	T	14	0	14	A	biallelic_hom	NA	NA	NA	NA	NA
AMER1	c.519dup	p.S174*	6	LNCaP_Abl	X	63412647	63412648	Frameshift_Indel	INS	-	35	0	35	A	biallelic_hom	https://cancer.sanger.ac.uk/cosmic/mutation/overview?id=28192748	COSM1468879	COSV57662519	38078
AR	c.234_239dup	p.Q79_Q80dup	7	LNCaP_Abl	X	66765158	66765159	Inframe_Indel	INS	-	8	1	7	GCAGCA	biallelic_hom	https://cancer.sanger.ac.uk/cosmic/mutation/overview?id=38853642	COSM5826564	COSV65953707	58047
AR	c.2632A>G	p.T878A	70	LNCaP_Abl	X	66943552	66943552	Missense_Mutation	SNP	A	27	0	27	G	biallelic_hom	https://cancer.sanger.ac.uk/cosmic/mutation/overview?id=38851267	COSM236693	COSV65953150	58047	prostate/carcinoma/NS=37/1953=1.89%
MED12	c.1218G>A	p.M406I	NA	LNCaP_Abl	X	70342166	70342166	Missense_Mutation	SNP	G	28	12	16	A	biallelic_het	NA	NA	NA	NA	NA
MED12	c.4420T>A	p.S1474T	NA	LNCaP_Abl	X	70352699	70352699	Missense_Mutation	SNP	T	12	8	4	A	biallelic_het	NA	NA	NA	NA	NA
MED12	c.4453G>A	p.V1485M	NA	LNCaP_Abl	X	70352732	70352732	Missense_Mutation	SNP	G	12	9	3	A	biallelic_het	NA	NA	NA	NA	NA
ZMYM3	c.143del	p.P48Lfs*65	NA	LNCaP_Abl	X	70472963	70472963	Frameshift_Indel	DEL	G	20	2	18	-	biallelic_hom	NA	NA	NA	NA	NA
ATRX	c.6792_6794del	p.E2265del	NA	LNCaP_Abl	X	76778785	76778787	Inframe_Indel	DEL	TCT	16	0	16	-	biallelic_hom	NA	NA	NA	NA	NA
IRS4	c.3182C>T	p.S1061F	NA	LNCaP_Abl	X	107976393	107976393	Missense_Mutation	SNP	G	12	9	3	A	monoallelic	NA	NA	NA	NA	NA
STAG2	c.1108C>T	p.R370W	5	LNCaP_Abl	X	123185061	123185061	Missense_Mutation	SNP	C	11	0	11	T	biallelic_hom	https://cancer.sanger.ac.uk/cosmic/mutation/overview?id=23800420	COSM238562	COSV54351727	63778
ELF4	c.1849C>T	p.L617F	NA	LNCaP_Abl	X	129200839	129200839	Missense_Mutation	SNP	G	25	0	25	A	biallelic_hom	NA	NA	NA	NA	NA
TNFRSF14	c.253G>A	p.A85T	NA	LNCaP	1	2489856	2489856	Missense_Mutation	SNP	G	24	12	12	A	monoallelic	NA	NA	NA	NA	NA
PRDM16	c.1912G>T	p.G638C	NA	LNCaP	1	3328673	3328673	Missense_Mutation	SNP	G	18	5	13	T	multi_monoallelic	NA	NA	NA	NA	NA
PRDM16	c.2254A>G	p.K752E	NA	LNCaP	1	3329015	3329015	Missense_Mutation	SNP	A	29	13	16	G	multi_monoallelic	NA	NA	NA	NA	NA
RPL22	c.44del	p.K15Rfs*5	133	LNCaP	1	6257785	6257785	Frameshift_Indel	DEL	T	18	0	18	-	biallelic_hom	https://cancer.sanger.ac.uk/cosmic/mutation/overview?id=23549956	COSM179404	COSV52376836	38078	large_intestine/carcinoma/adenocarcinoma=68/2391=2.84%;stomach/carcinoma/intestinal_adenocarcinoma=12/97=12.37%;stomach/carcinoma/NS=22/559=3.94%;biliary_tract/carcinoma/NS=6/266=2.26%
ARID1A	c.854del	p.G285Efs*78	NA	LNCaP	1	27023744	27023744	Frameshift_Indel	DEL	G	22	10	12	-	monoallelic	NA	NA	NA	NA	NA
LCK	c.427G>T	p.A143S	NA	LNCaP	1	32741219	32741219	Missense_Mutation	SNP	G	21	8	13	T	monoallelic	NA	NA	NA	NA	NA
MPL	c.770G>A	p.R257H	2	LNCaP	1	43805714	43805714	Missense_Mutation	SNP	G	22	14	8	A	biallelic_het	https://cancer.sanger.ac.uk/cosmic/mutation/overview?id=36966910	COSM2170440	COSV65244545	38078
MPL	c.824C>T	p.P275L	NA	LNCaP	1	43805768	43805768	Missense_Mutation	SNP	C	25	13	12	T	biallelic_het	NA	NA	NA	NA	NA
JAK1	c.1289dup	p.L431Vfs*22	18	LNCaP	1	65325832	65325833	Frameshift_Indel	INS	-	17	9	8	G	biallelic_het	https://cancer.sanger.ac.uk/cosmic/mutation/overview?id=29880993	COSM41842	COSV61087635	65273
JAK1	c.425del	p.K142Rfs*26	12	LNCaP	1	65339111	65339111	Frameshift_Indel	DEL	T	20	8	12	-	biallelic_het	https://cancer.sanger.ac.uk/cosmic/mutation/overview?id=29882237	COSM1639943	COSV61087645	65273
RPL5	c.130dup	p.Y44Lfs*69	NA	LNCaP	1	93299157	93299158	Frameshift_Indel	INS	-	23	13	10	T	monoallelic	NA	NA	NA	NA	NA
NOTCH2	c.5311-1G>T	p.X1771_splice	NA	LNCaP	1	120463021	120463021	Splice_Site	SNP	C	34	20	14	A	biallelic_het	NA	NA	NA	NA	NA
NOTCH2	c.316T>C	p.S106P	NA	LNCaP	1	120548051	120548051	Missense_Mutation	SNP	A	45	32	13	G	biallelic_het	NA	NA	NA	NA	NA
BCL9	c.2065_2067del	p.S689del	NA	LNCaP	1	147092024	147092026	Inframe_Indel	DEL	CTT	31	15	16	-	monoallelic	NA	NA	NA	NA	NA
SETDB1	c.2920G>A	p.E974K	NA	LNCaP	1	150933458	150933458	Missense_Mutation	SNP	G	18	10	8	A	monoallelic	NA	NA	NA	NA	NA
ETV3	c.1416del	p.K473Sfs*4	3	LNCaP	1	157094756	157094756	Frameshift_Indel	DEL	G	26	19	7	-	monoallelic	https://cancer.sanger.ac.uk/cosmic/mutation/overview?id=35912026	COSM1984959	COSV63864335	38078
FCRL4	c.561dup	p.E188Rfs*26	NA	LNCaP	1	157557655	157557656	Frameshift_Indel	INS	-	20	8	12	T	monoallelic	NA	NA	NA	NA	NA
ABL2	c.404G>A	p.R135Q	NA	LNCaP	1	179095795	179095795	Missense_Mutation	SNP	C	34	10	24	T	monoallelic	NA	NA	NA	NA	NA
ABI1	c.1523A>T	p.D508V	NA	LNCaP	10	27037503	27037503	Missense_Mutation	SNP	T	28	13	15	A	multi_monoallelic	NA	NA	NA	NA	NA
ABI1	c.581G>A	p.R194Q	NA	LNCaP	10	27057919	27057919	Missense_Mutation	SNP	C	42	23	19	T	multi_monoallelic	NA	NA	NA	NA	NA
RET	c.230G>A	p.R77H	2	LNCaP	10	43596063	43596063	Missense_Mutation	SNP	G	33	12	21	A	biallelic_het	https://cancer.sanger.ac.uk/cosmic/mutation/overview?id=33977950	COSM294752	COSV60688178	38078
RET	c.2573T>C	p.I858T	NA	LNCaP	10	43615159	43615159	Missense_Mutation	SNP	T	35	16	19	C	biallelic_het	NA	NA	NA	NA	NA
KAT6B	c.5356G>A	p.E1786K	1	LNCaP	10	76789938	76789938	Missense_Mutation	SNP	G	21	10	11	A	monoallelic	https://cancer.sanger.ac.uk/cosmic/mutation/overview?id=24771038	COSM7103190	COSV54744157	38078
NUTM2D	c.325T>C	p.F109L	2	LNCaP	10	89120396	89120396	Missense_Mutation	SNP	T	3	0	3	C	biallelic_hom	https://cancer.sanger.ac.uk/cosmic/mutation/overview?id=48496950	COSM4591792	COSV67745869	38078
PTEN	c.17_18del	p.K6Rfs*4	NA	LNCaP	10	89624242	89624243	Frameshift_Indel	DEL	AA	9	0	9	-	biallelic_hom	NA	NA	NA	NA	NA
NUP98	c.536G>A	p.S179N	NA	LNCaP	11	3794929	3794929	Missense_Mutation	SNP	C	30	18	12	T	monoallelic	NA	NA	NA	NA	NA
MEN1	c.954T>A	p.Y318*	NA	LNCaP	11	64573814	64573814	Nonsense_Mutation	SNP	A	28	13	15	T	monoallelic	NA	NA	NA	NA	NA
BIRC3	c.905G>A	p.W302*	NA	LNCaP	11	102196248	102196248	Nonsense_Mutation	SNP	G	39	19	20	A	monoallelic	NA	NA	NA	NA	NA
USP28	c.2246C>A	p.A749D	NA	LNCaP	11	113679078	113679078	Missense_Mutation	SNP	G	36	17	19	T	monoallelic	NA	NA	NA	NA	NA
BCL9L	c.2656C>T	p.R886W	NA	LNCaP	11	118771796	118771796	Missense_Mutation	SNP	G	27	17	10	A	monoallelic	NA	NA	NA	NA	NA
ADAMTS8	c.62del	p.L21Rfs*55	NA	LNCaP	11	130298120	130298120	Frameshift_Indel	DEL	A	19	10	9	-	multi_monoallelic	NA	NA	NA	NA	NA
ADAMTS8	c.59_60del	p.L20Pfs*179	NA	LNCaP	11	130298122	130298123	Frameshift_Indel	DEL	CA	19	10	9	-	multi_monoallelic	NA	NA	NA	NA	NA
KDM5A	c.3597del	p.G1200Dfs*9	35	LNCaP	12	416953	416953	Frameshift_Indel	DEL	T	23	10	13	-	biallelic_het	https://cancer.sanger.ac.uk/cosmic/mutation/overview?id=44678327	COSM1180773	COSV66990113	54115	endometrium/carcinoma/endometrioid_carcinoma=4/95=4.21%
KDM5A	c.1906T>C	p.C636R	NA	LNCaP	12	438063	438063	Missense_Mutation	SNP	A	37	18	19	G	biallelic_het	NA	NA	NA	NA	NA
CHD4	c.2614G>A	p.V872M	NA	LNCaP	12	6702295	6702295	Missense_Mutation	SNP	C	39	19	20	T	monoallelic	NA	NA	NA	NA	NA
SMARCD1	c.866A>G	p.D289G	NA	LNCaP	12	50483761	50483761	Missense_Mutation	SNP	A	25	12	13	G	monoallelic	NA	NA	NA	NA	NA
ERBB3	c.531G>T	p.K177N	NA	LNCaP	12	56480424	56480424	Missense_Mutation	SNP	G	18	10	8	T	monoallelic	NA	NA	NA	NA	NA
CDK4	c.329C>T	p.P110L	NA	LNCaP	12	58145015	58145015	Missense_Mutation	SNP	G	27	12	15	A	monoallelic	NA	NA	NA	NA	NA
STAB2	c.4978C>T	p.R1660W	NA	LNCaP	12	104122669	104122669	Missense_Mutation	SNP	C	26	18	8	T	monoallelic	NA	NA	NA	NA	NA
NCOR2	c.5509_5517dup	p.S1837_G1839dup	27	LNCaP	12	124824721	124824722	Inframe_Indel	INS	-	40	0	40	GCCGCTGCT	biallelic_hom	https://cancer.sanger.ac.uk/cosmic/mutation/overview?id=45371441	COSM1359887	COSV62292510	41645
NCOR2	c.1529_1531dup	p.Q510dup	12	LNCaP	12	124887058	124887059	Inframe_Indel	INS	-	25	12	13	GCT	biallelic_hom	https://cancer.sanger.ac.uk/cosmic/mutation/overview?id=45371257	COSM1476307	COSV62292713	38078	thyroid/other/neoplasm=4/15=26.67%
NCOR2	c.500T>C	p.L167P	3	LNCaP	12	124957589	124957589	Missense_Mutation	SNP	A	34	14	20	G	biallelic_hom	https://cancer.sanger.ac.uk/cosmic/mutation/overview?id=45379143	COSM2227173	COSV62295110	3567
ERCC5	c.3067C>A	p.L1023I	NA	LNCaP	13	103527759	103527759	Missense_Mutation	SNP	C	31	4	27	A	monoallelic	NA	NA	NA	NA	NA
NIN	c.2750A>G	p.Q917R	NA	LNCaP	14	51224998	51224998	Missense_Mutation	SNP	T	19	8	11	C	monoallelic	NA	NA	NA	NA	NA
RAD51B	c.52C>T	p.R18C	NA	LNCaP	14	68290312	68290312	Missense_Mutation	SNP	C	33	18	15	T	monoallelic	NA	NA	NA	NA	NA
TSHR	c.801G>T	p.L267F	NA	LNCaP	14	81606131	81606131	Missense_Mutation	SNP	G	32	11	21	T	monoallelic	NA	NA	NA	NA	NA
MGA	c.5579C>T	p.A1860V	NA	LNCaP	15	42041384	42041384	Missense_Mutation	SNP	C	31	15	16	T	biallelic_het	NA	NA	NA	NA	NA
MGA	c.5704C>A	p.L1902M	NA	LNCaP	15	42041509	42041509	Missense_Mutation	SNP	C	38	22	16	A	biallelic_het	NA	NA	NA	NA	NA
MGA	c.6202G>T	p.E2068*	NA	LNCaP	15	42042007	42042007	Nonsense_Mutation	SNP	G	25	15	10	T	biallelic_het	NA	NA	NA	NA	NA
USP8	c.226dup	p.R76Kfs*3	NA	LNCaP	15	50733660	50733661	Frameshift_Indel	INS	-	26	5	21	A	monoallelic	NA	NA	NA	NA	NA
TCF12	c.579+1G>A	p.X193_splice	NA	LNCaP	15	57490024	57490024	Splice_Site	SNP	G	49	23	26	A	monoallelic	NA	NA	NA	NA	NA
CRTC3	c.700-1G>T	p.X234_splice	NA	LNCaP	15	91162972	91162972	Splice_Site	SNP	G	24	12	12	T	monoallelic	NA	NA	NA	NA	NA
TRAF7	c.660-1G>A	p.X220_splice	NA	LNCaP	16	2222465	2222465	Splice_Site	SNP	G	18	4	14	A	monoallelic	NA	NA	NA	NA	NA
CREBBP	c.329C>T	p.A110V	NA	LNCaP	16	3900767	3900767	Missense_Mutation	SNP	G	27	14	13	A	monoallelic	NA	NA	NA	NA	NA
PPL	c.4622A>G	p.E1541G	NA	LNCaP	16	4934034	4934034	Missense_Mutation	SNP	T	24	11	13	C	monoallelic	NA	NA	NA	NA	NA
CIITA	c.1893dup	p.K632Qfs*117	NA	LNCaP	16	11001240	11001241	Frameshift_Indel	INS	-	28	13	15	C	monoallelic	NA	NA	NA	NA	NA
CDH1	c.280C>A	p.P94T	2	LNCaP	16	68835689	68835689	Missense_Mutation	SNP	C	34	25	9	A	biallelic_het	https://cancer.sanger.ac.uk/cosmic/mutation/overview?id=22000395	COSM6005624	COSV55729356	30667
CDH1	c.2098C>T	p.P700S	2	LNCaP	16	68857463	68857463	Missense_Mutation	SNP	C	20	9	11	T	biallelic_het	https://cancer.sanger.ac.uk/cosmic/mutation/overview?id=21999414	COSM3271910	COSV55729365	30667
PER1	c.3291C>A	p.Y1097*	NA	LNCaP	17	8045745	8045745	Nonsense_Mutation	SNP	G	29	10	19	T	monoallelic	NA	NA	NA	NA	NA
NF1	c.1292C>T	p.A431V	NA	LNCaP	17	29533289	29533289	Missense_Mutation	SNP	C	34	17	17	T	multi_monoallelic	NA	NA	NA	NA	NA
NF1	c.2069C>T	p.A690V	NA	LNCaP	17	29553520	29553520	Missense_Mutation	SNP	C	21	10	11	T	multi_monoallelic	NA	NA	NA	NA	NA
PRKAR1A	c.47G>A	p.R16Q	5	LNCaP	17	66511587	66511587	Missense_Mutation	SNP	G	44	24	20	A	monoallelic	https://cancer.sanger.ac.uk/cosmic/mutation/overview?id=89897201	COSM2975001	COSV62235272	56063
H3F3B	c.400G>T	p.E134*	NA	LNCaP	17	73774687	73774687	Nonsense_Mutation	SNP	C	22	11	11	A	monoallelic	NA	NA	NA	NA	NA
RNF213	c.8938G>A	p.A2980T	NA	LNCaP	17	78321073	78321073	Missense_Mutation	SNP	G	27	14	13	A	monoallelic	NA	NA	NA	NA	NA
MALT1	c.377-1G>A	p.X126_splice	NA	LNCaP	18	56363597	56363597	Splice_Site	SNP	G	17	10	7	A	monoallelic	NA	NA	NA	NA	NA
GNA11	c.439C>T	p.R147C	2	LNCaP	19	3113445	3113445	Missense_Mutation	SNP	C	15	11	4	T	monoallelic	https://cancer.sanger.ac.uk/cosmic/mutation/overview?id=21239332	COSM2750391	COSV50019275	62728
COL5A3	c.3202G>T	p.A1068S	NA	LNCaP	19	10088073	10088073	Missense_Mutation	SNP	C	39	16	23	A	monoallelic	NA	NA	NA	NA	NA
KEAP1	c.763T>C	p.Y255H	NA	LNCaP	19	10602815	10602815	Missense_Mutation	SNP	A	22	10	12	G	monoallelic	NA	NA	NA	NA	NA
LYL1	c.794C>T	p.A265V	NA	LNCaP	19	13210182	13210182	Missense_Mutation	SNP	G	22	12	10	A	monoallelic	NA	NA	NA	NA	NA
TRPM4	c.3221C>T	p.A1074V	NA	LNCaP	19	49713555	49713555	Missense_Mutation	SNP	C	25	7	18	T	monoallelic	NA	NA	NA	NA	NA
POLD1	c.1602G>T	p.E534D	NA	LNCaP	19	50910347	50910347	Missense_Mutation	SNP	G	33	21	12	T	monoallelic	NA	NA	NA	NA	NA
CNOT3	c.977G>C	p.G326A	NA	LNCaP	19	54651965	54651965	Missense_Mutation	SNP	G	23	13	10	C	monoallelic	NA	NA	NA	NA	NA
MYCN	c.134dup	p.E47Gfs*8	NA	LNCaP	2	16082313	16082314	Frameshift_Indel	INS	-	15	7	8	C	monoallelic	NA	NA	NA	NA	NA
DNMT3A	c.320C>T	p.A107V	1	LNCaP	2	25505438	25505438	Missense_Mutation	SNP	G	32	24	8	A	monoallelic	https://cancer.sanger.ac.uk/cosmic/mutation/overview?id=23929718	COSM2911854	COSV53057010	38078
EPAS1	c.1681del	p.Q561Sfs*7	2	LNCaP	2	46607487	46607487	Frameshift_Indel	DEL	C	4	1	3	-	Noinfo	https://cancer.sanger.ac.uk/cosmic/mutation/overview?id=22138713	COSM3185630	COSV55385065	38078
EPAS1	c.1898del	p.G633Afs*63	3	LNCaP	2	46607704	46607704	Frameshift_Indel	DEL	G	13	7	6	-	Noinfo	https://cancer.sanger.ac.uk/cosmic/mutation/overview?id=22138210	COSM4681156	COSV55385775	38078
MSH6	c.145_146insAGCGCGCCAAGGGCCTGGGCCCAGGCCCAGCCTCGCTCCAGGCCGCATCCCCG	p.A49Efs*50	NA	LNCaP	2	48010516	48010517	Frameshift_Indel	INS	-	5	4	1	GAGCGCGCCAAGGGCCTGGGCCCAGGCCCAGCCTCGCTCCAGGCCGCATCCCC	multi_monoallelic	NA	NA	NA	NA	NA
MSH6	c.151A>G	p.S51G	NA	LNCaP	2	48010523	48010523	Missense_Mutation	SNP	A	7	4	3	G	multi_monoallelic	NA	NA	NA	NA	NA
AFF3	c.1429dup	p.H477Pfs*8	NA	LNCaP	2	100217913	100217914	Frameshift_Indel	INS	-	15	7	8	G	monoallelic	NA	NA	NA	NA	NA
PAX8	c.191G>A	p.R64K	2	LNCaP	2	114004331	114004331	Missense_Mutation	SNP	C	21	11	10	T	monoallelic	https://cancer.sanger.ac.uk/cosmic/mutation/overview?id=53452458	COSM6005686	COSV54507010	2813
ERCC3	c.2218G>A	p.A740T	1	LNCaP	2	128015303	128015303	Missense_Mutation	SNP	C	22	7	15	T	biallelic_het	https://cancer.sanger.ac.uk/cosmic/mutation/overview?id=20349119	COSM3042188	COSV53427508	14776
ERCC3	c.1171C>T	p.R391W	1	LNCaP	2	128044450	128044450	Missense_Mutation	SNP	G	16	9	7	A	biallelic_het	https://cancer.sanger.ac.uk/cosmic/mutation/overview?id=20348879	COSM3042203	COSV53427536	38078
CXCR4	c.840dup	p.E281*	NA	LNCaP	2	136872669	136872670	Frameshift_Indel	INS	-	25	18	7	A	monoallelic	NA	NA	NA	NA	NA
LRP1B	c.12384A>G	p.I4128M	1	LNCaP	2	141081592	141081592	Missense_Mutation	SNP	T	22	16	6	C	biallelic_het	https://cancer.sanger.ac.uk/cosmic/mutation/overview?id=41582278	COSM8344842	COSV101262057	38078
LRP1B	c.12378T>A	p.D4126E	1	LNCaP	2	141081598	141081598	Missense_Mutation	SNP	A	25	19	6	T	biallelic_het	https://cancer.sanger.ac.uk/cosmic/mutation/overview?id=41443199	COSM5952721	COSV67193662	38078
LRP1B	c.8288C>T	p.A2763V	1	LNCaP	2	141267607	141267607	Missense_Mutation	SNP	G	30	7	23	A	biallelic_het	https://cancer.sanger.ac.uk/cosmic/mutation/overview?id=41590342	COSM3117331	COSV67229831	38078
LRP1B	c.8258A>G	p.D2753G	NA	LNCaP	2	141272233	141272233	Missense_Mutation	SNP	T	28	8	20	C	biallelic_het	NA	NA	NA	NA	NA
ACVR2A	c.1310del	p.K437Rfs*5	NA	LNCaP	2	148683686	148683686	Frameshift_Indel	DEL	A	5	1	4	-	monoallelic	NA	NA	NA	NA	NA
ACVR1	c.542C>T	p.A181V	NA	LNCaP	2	158634644	158634644	Missense_Mutation	SNP	G	17	13	4	A	monoallelic	NA	NA	NA	NA	NA
SF3B1	c.314C>T	p.A105V	NA	LNCaP	2	198285253	198285253	Missense_Mutation	SNP	G	27	10	17	A	monoallelic	NA	NA	NA	NA	NA
ATIC	c.1673A>T	p.Y558F	NA	LNCaP	2	216214272	216214272	Missense_Mutation	SNP	A	30	8	22	T	monoallelic	NA	NA	NA	NA	NA
TOP1	c.2113G>T	p.A705S	NA	LNCaP	20	39750713	39750713	Missense_Mutation	SNP	G	24	11	13	T	monoallelic	NA	NA	NA	NA	NA
PTPRT	c.2714A>G	p.D905G	NA	LNCaP	20	40770611	40770611	Missense_Mutation	SNP	T	37	19	18	C	biallelic_het	NA	NA	NA	NA	NA
PTPRT	c.2584del	p.R862Gfs*20	NA	LNCaP	20	40790090	40790090	Frameshift_Indel	DEL	G	18	8	10	-	biallelic_het	NA	NA	NA	NA	NA
NFATC2	c.2598G>T	p.Q866H	NA	LNCaP	20	50048728	50048728	Missense_Mutation	SNP	C	32	18	14	A	monoallelic	NA	NA	NA	NA	NA
GNAS	c.1840C>T	p.Q614*	NA	LNCaP	20	57430160	57430160	Nonsense_Mutation	SNP	C	16	8	8	T	monoallelic	NA	NA	NA	NA	NA
SS18L1	c.146+1G>T	p.X49_splice	NA	LNCaP	20	60733805	60733805	Splice_Site	SNP	G	27	7	20	T	monoallelic	NA	NA	NA	NA	NA
BCR	c.2596A>C	p.K866Q	NA	LNCaP	22	23630353	23630353	Missense_Mutation	SNP	A	18	6	12	C	monoallelic	NA	NA	NA	NA	NA
MN1	c.3528del	p.L1177*	NA	LNCaP	22	28193004	28193004	Frameshift_Indel	DEL	C	19	9	10	-	multi_monoallelic	NA	NA	NA	NA	NA
MN1	c.2255G>A	p.G752D	NA	LNCaP	22	28194277	28194277	Missense_Mutation	SNP	C	9	5	4	T	multi_monoallelic	NA	NA	NA	NA	NA
CHEK2	c.1289C>A	p.T430N	NA	LNCaP	22	29091797	29091797	Missense_Mutation	SNP	G	24	11	13	T	monoallelic	NA	NA	NA	NA	NA
PATZ1	c.1595T>A	p.I532N	NA	LNCaP	22	31724823	31724823	Missense_Mutation	SNP	A	33	13	20	T	monoallelic	NA	NA	NA	NA	NA
MYH9	c.80C>T	p.A27V	NA	LNCaP	22	36745202	36745202	Missense_Mutation	SNP	G	28	13	15	A	monoallelic	NA	NA	NA	NA	NA
EP300	c.5332G>T	p.G1778W	NA	LNCaP	22	41573047	41573047	Missense_Mutation	SNP	G	16	7	9	T	monoallelic	NA	NA	NA	NA	NA
SETD2	c.4953del	p.F1651Lfs*12	NA	LNCaP	3	47143010	47143010	Frameshift_Indel	DEL	A	33	20	13	-	multi_monoallelic	NA	NA	NA	NA	NA
SETD2	c.419G>A	p.G140D	NA	LNCaP	3	47165707	47165707	Missense_Mutation	SNP	C	23	16	7	T	multi_monoallelic	NA	NA	NA	NA	NA
DHX30	c.530del	p.G177Dfs*9	NA	LNCaP	3	47882526	47882526	Frameshift_Indel	DEL	G	21	14	7	-	monoallelic	NA	NA	NA	NA	NA
CACNA1D	c.5689G>C	p.D1897H	NA	LNCaP	3	53839053	53839053	Missense_Mutation	SNP	G	25	16	9	C	monoallelic	NA	NA	NA	NA	NA
CBLB	c.557T>C	p.F186S	NA	LNCaP	3	105495249	105495249	Missense_Mutation	SNP	A	32	19	13	G	monoallelic	NA	NA	NA	NA	NA
ATR	c.4137A>T	p.K1379N	NA	LNCaP	3	142242850	142242850	Missense_Mutation	SNP	T	26	11	15	A	monoallelic	NA	NA	NA	NA	NA
TBL1XR1	c.1108G>A	p.D370N	3	LNCaP	3	176755900	176755900	Missense_Mutation	SNP	C	37	16	21	T	biallelic_het	https://cancer.sanger.ac.uk/cosmic/mutation/overview?id=54821924	COSM1420704	COSV70501537	38078
TBL1XR1	c.377dup	p.N126Kfs*19	1	LNCaP	3	176769341	176769342	Frameshift_Indel	INS	-	33	14	19	T	biallelic_het	https://cancer.sanger.ac.uk/cosmic/mutation/overview?id=54822441	COSM3205542	COSV61790790	38078
MAP3K13	c.24T>A	p.C8*	NA	LNCaP	3	185047018	185047018	Nonsense_Mutation	SNP	T	24	13	11	A	monoallelic	NA	NA	NA	NA	NA
FAT4	c.127G>A	p.A43T	NA	LNCaP	4	126237693	126237693	Missense_Mutation	SNP	G	33	20	13	A	monoallelic	NA	NA	NA	NA	NA
TERT	c.2593C>T	p.R865C	NA	LNCaP	5	1266640	1266640	Missense_Mutation	SNP	G	28	13	15	A	monoallelic	NA	NA	NA	NA	NA
LIFR	c.716G>A	p.S239N	NA	LNCaP	5	38511912	38511912	Missense_Mutation	SNP	C	34	16	18	T	monoallelic	NA	NA	NA	NA	NA
PIK3R1	c.1915C>T	p.R639*	9	LNCaP	5	67592099	67592099	Nonsense_Mutation	SNP	C	34	23	11	T	monoallelic	https://cancer.sanger.ac.uk/cosmic/mutation/overview?id=74010580	COSM3071985	COSV57126125	68086
CHD1	c.929dup	p.N310Kfs*12	NA	LNCaP	5	98235339	98235340	Frameshift_Indel	INS	-	21	11	10	T	monoallelic	NA	NA	NA	NA	NA
APC	c.8140C>T	p.R2714C	NA	LNCaP	5	112179431	112179431	Missense_Mutation	SNP	C	29	16	13	T	monoallelic	NA	NA	NA	NA	NA
ITK	c.1155G>T	p.K385N	3	LNCaP	5	156670727	156670727	Missense_Mutation	SNP	G	36	15	21	T	monoallelic	https://cancer.sanger.ac.uk/cosmic/mutation/overview?id=51356214	COSM3246297	COSV70060822	1627
EBF1	c.1450G>A	p.V484I	4	LNCaP	5	158139261	158139261	Missense_Mutation	SNP	C	26	12	14	T	monoallelic	https://cancer.sanger.ac.uk/cosmic/mutation/overview?id=27248454	COSM3247046	COSV58168843	38078
FLT4	c.3272A>G	p.Y1091C	NA	LNCaP	5	180041127	180041127	Missense_Mutation	SNP	T	14	6	8	C	monoallelic	NA	NA	NA	NA	NA
IRF4	c.918G>T	p.K306N	NA	LNCaP	6	401596	401596	Missense_Mutation	SNP	G	20	3	17	T	monoallelic	NA	NA	NA	NA	NA
HMGA1	c.209C>A	p.A70D	NA	LNCaP	6	34210562	34210562	Missense_Mutation	SNP	C	16	2	14	A	monoallelic	NA	NA	NA	NA	NA
LATS1	c.563A>G	p.Q188R	NA	LNCaP	6	150005662	150005662	Missense_Mutation	SNP	T	26	16	10	C	monoallelic	NA	NA	NA	NA	NA
ARID1B	c.6490G>T	p.E2164*	NA	LNCaP	6	157528765	157528765	Nonsense_Mutation	SNP	G	33	17	16	T	monoallelic	NA	NA	NA	NA	NA
IGF2R	c.4238C>A	p.P1413Q	NA	LNCaP	6	160489403	160489403	Missense_Mutation	SNP	C	42	24	18	A	monoallelic	NA	NA	NA	NA	NA
ETV1	c.620G>A	p.G207E	NA	LNCaP	7	13971309	13971309	Missense_Mutation	SNP	C	38	21	17	T	monoallelic	NA	NA	NA	NA	NA
HOXA11	c.226del	p.R76Afs*219	NA	LNCaP	7	27224538	27224538	Frameshift_Indel	DEL	G	27	14	13	-	monoallelic	NA	NA	NA	NA	NA
SBDS	c.136G>T	p.D46Y	NA	LNCaP	7	66459321	66459321	Missense_Mutation	SNP	C	31	13	18	A	monoallelic	NA	NA	NA	NA	NA
HIP1	c.2732C>T	p.A911V	NA	LNCaP	7	75174027	75174027	Missense_Mutation	SNP	G	32	11	21	A	biallelic_het	NA	NA	NA	NA	NA
HIP1	c.628C>T	p.R210C	NA	LNCaP	7	75203183	75203183	Missense_Mutation	SNP	G	24	13	11	A	biallelic_het	NA	NA	NA	NA	NA
TRRAP	c.7993C>T	p.R2665W	2	LNCaP	7	98574160	98574160	Missense_Mutation	SNP	C	36	18	18	T	multi_monoallelic	https://cancer.sanger.ac.uk/cosmic/mutation/overview?id=32062076	COSM1093666	COSV62839851	38078
TRRAP	c.10661C>T	p.P3554L	NA	LNCaP	7	98602921	98602921	Missense_Mutation	SNP	C	29	15	14	T	multi_monoallelic	NA	NA	NA	NA	NA
CUX1	c.4101G>T	p.K1367N	NA	LNCaP	7	101891872	101891872	Missense_Mutation	SNP	G	23	13	10	T	monoallelic	NA	NA	NA	NA	NA
SMO	c.817T>C	p.C273R	NA	LNCaP	7	128845520	128845520	Missense_Mutation	SNP	T	18	7	11	C	monoallelic	NA	NA	NA	NA	NA
TRIM24	c.982C>A	p.L328M	NA	LNCaP	7	138213961	138213961	Missense_Mutation	SNP	C	17	10	7	A	monoallelic	NA	NA	NA	NA	NA
KMT2C	c.13488del	p.F4496Lfs*21	15	LNCaP	7	151845524	151845524	Frameshift_Indel	DEL	A	21	6	15	-	multi_monoallelic	https://cancer.sanger.ac.uk/cosmic/mutation/overview?id=22733289	COSM1181043	COSV51394086	63101
KMT2C	c.12425T>C	p.L4142S	NA	LNCaP	7	151849891	151849891	Missense_Mutation	SNP	A	17	13	4	G	multi_monoallelic	NA	NA	NA	NA	NA
NRG1	c.1834C>A	p.L612M	NA	LNCaP	8	32621816	32621816	Missense_Mutation	SNP	C	33	17	16	A	monoallelic	NA	NA	NA	NA	NA
FGFR1	c.332G>A	p.R111H	NA	LNCaP	8	38287325	38287325	Missense_Mutation	SNP	C	35	19	16	T	monoallelic	NA	NA	NA	NA	NA
KAT6A	c.5804G>T	p.S1935I	NA	LNCaP	8	41789934	41789934	Missense_Mutation	SNP	C	29	16	13	A	biallelic_het	NA	NA	NA	NA	NA
KAT6A	c.2135G>A	p.S712N	NA	LNCaP	8	41801359	41801359	Missense_Mutation	SNP	C	27	15	12	T	biallelic_het	NA	NA	NA	NA	NA
HOOK3	c.1444G>A	p.E482K	NA	LNCaP	8	42841850	42841850	Missense_Mutation	SNP	G	35	19	16	A	monoallelic	NA	NA	NA	NA	NA
CHCHD7	c.299A>G	p.E100G	NA	LNCaP	8	57129960	57129960	Missense_Mutation	SNP	A	30	22	8	G	monoallelic	NA	NA	NA	NA	NA
RSPO2	c.171G>T	p.Q57H	1	LNCaP	8	109001396	109001396	Missense_Mutation	SNP	C	27	14	13	A	monoallelic	https://cancer.sanger.ac.uk/cosmic/mutation/overview?id=23862851	COSM7595209	COSV99409518	38078
EXT1	c.1935G>T	p.M645I	NA	LNCaP	8	118817081	118817081	Missense_Mutation	SNP	C	36	23	13	A	monoallelic	NA	NA	NA	NA	NA
MYC	c.134A>G	p.N45S	2	LNCaP	8	128750597	128750597	Missense_Mutation	SNP	A	37	19	18	G	monoallelic	https://cancer.sanger.ac.uk/cosmic/mutation/overview?id=38683930	COSM3316855	COSV52382592	38078
RECQL4	c.2296del	p.X766_splice	NA	LNCaP	8	145738768	145738768	Splice_Site	DEL	G	29	0	29	-	biallelic_hom	NA	NA	NA	NA	NA
SYK	c.98del	p.G33Afs*2	NA	LNCaP	9	93606273	93606273	Frameshift_Indel	DEL	G	30	16	14	-	monoallelic	NA	NA	NA	NA	NA
COL15A1	c.3727G>A	p.A1243T	NA	LNCaP	9	101829239	101829239	Missense_Mutation	SNP	G	21	6	15	A	monoallelic	NA	NA	NA	NA	NA
NR4A3	c.995A>G	p.Q332R	3	LNCaP	9	102594981	102594981	Missense_Mutation	SNP	A	36	22	14	G	monoallelic	https://cancer.sanger.ac.uk/cosmic/mutation/overview?id=28681367	COSM3166798	COSV58243849	388
CNTRL	c.5164_5165insT	p.R1722Mfs*4	NA	LNCaP	9	123924208	123924209	Frameshift_Indel	INS	-	36	15	21	T	monoallelic	NA	NA	NA	NA	NA
ABL1	c.2366A>G	p.N789S	NA	LNCaP	9	133759986	133759986	Missense_Mutation	SNP	A	18	5	13	G	monoallelic	NA	NA	NA	NA	NA
NUP214	c.6060C>A	p.S2020R	NA	LNCaP	9	134103704	134103704	Missense_Mutation	SNP	C	37	19	18	A	monoallelic	NA	NA	NA	NA	NA
TSC1	c.880A>G	p.T294A	NA	LNCaP	9	135787702	135787702	Missense_Mutation	SNP	T	35	26	9	C	biallelic_het	NA	NA	NA	NA	NA
TSC1	c.439G>T	p.G147W	NA	LNCaP	9	135798804	135798804	Missense_Mutation	SNP	C	33	18	15	A	biallelic_het	NA	NA	NA	NA	NA
COL5A1	c.2828G>A	p.G943D	NA	LNCaP	9	137688248	137688248	Missense_Mutation	SNP	G	27	17	10	A	monoallelic	NA	NA	NA	NA	NA
NOTCH1	c.2594C>A	p.T865N	NA	LNCaP	9	139405251	139405251	Missense_Mutation	SNP	G	16	6	10	T	monoallelic	NA	NA	NA	NA	NA
AMER1	c.519dup	p.S174*	6	LNCaP	X	63412647	63412648	Frameshift_Indel	INS	-	16	0	16	A	biallelic_hom	https://cancer.sanger.ac.uk/cosmic/mutation/overview?id=28192748	COSM1468879	COSV57662519	38078
AR	c.228_239dup	p.Q77_Q80dup	NA	LNCaP	X	66765158	66765159	Inframe_Indel	INS	-	4	0	4	GCAGCAGCAGCA	biallelic_hom	NA	NA	NA	NA	NA
AR	c.2632A>G	p.T878A	70	LNCaP	X	66943552	66943552	Missense_Mutation	SNP	A	15	0	15	G	biallelic_hom	https://cancer.sanger.ac.uk/cosmic/mutation/overview?id=38851267	COSM236693	COSV65953150	58047	prostate/carcinoma/NS=37/1953=1.89%
ZMYM3	c.143del	p.P48Lfs*65	NA	LNCaP	X	70472963	70472963	Frameshift_Indel	DEL	G	13	0	13	-	biallelic_hom	NA	NA	NA	NA	NA
ATRX	c.6792_6794del	p.E2265del	NA	LNCaP	X	76778785	76778787	Inframe_Indel	DEL	TCT	13	0	13	-	biallelic_hom	NA	NA	NA	NA	NA
STAG2	c.1108C>T	p.R370W	5	LNCaP	X	123185061	123185061	Missense_Mutation	SNP	C	5	0	5	T	biallelic_hom	https://cancer.sanger.ac.uk/cosmic/mutation/overview?id=23800420	COSM238562	COSV54351727	63778
ELF4	c.1849C>T	p.L617F	NA	LNCaP	X	129200839	129200839	Missense_Mutation	SNP	G	16	0	16	A	biallelic_hom	NA	NA	NA	NA	NA
GPC3	c.403C>A	p.P135T	NA	LNCaP	X	132888138	132888138	Missense_Mutation	SNP	G	6	0	6	T	biallelic_hom	NA	NA	NA	NA	NA
PRDM16	c.336del	p.C113Afs*20	NA	MDA-PCa-2b	1	3102984	3102984	Frameshift_Indel	DEL	C	48	26	22	-	multi_monoallelic	NA	NA	NA	NA	NA
PRDM16	c.3272G>A	p.R1091Q	1	MDA-PCa-2b	1	3342777	3342777	Missense_Mutation	SNP	G	19	9	10	A	multi_monoallelic	https://cancer.sanger.ac.uk/cosmic/mutation/overview?id=20917647	COSM9248886	COSV104374691	38078
RPL22	c.44del	p.K15Rfs*5	133	MDA-PCa-2b	1	6257785	6257785	Frameshift_Indel	DEL	T	33	16	17	-	monoallelic	https://cancer.sanger.ac.uk/cosmic/mutation/overview?id=23549956	COSM179404	COSV52376836	38078	large_intestine/carcinoma/adenocarcinoma=68/2391=2.84%;stomach/carcinoma/intestinal_adenocarcinoma=12/97=12.37%;stomach/carcinoma/NS=22/559=3.94%;biliary_tract/carcinoma/NS=6/266=2.26%
SPEN	c.5476A>G	p.T1826A	NA	MDA-PCa-2b	1	16258211	16258211	Missense_Mutation	SNP	A	37	19	18	G	multi_monoallelic	NA	NA	NA	NA	NA
SPEN	c.8485C>T	p.R2829W	NA	MDA-PCa-2b	1	16261220	16261220	Missense_Mutation	SNP	C	31	11	20	T	multi_monoallelic	NA	NA	NA	NA	NA
MUTYH	c.553G>A	p.E185K	2	MDA-PCa-2b	1	45798449	45798449	Missense_Mutation	SNP	C	32	15	17	T	monoallelic	https://cancer.sanger.ac.uk/cosmic/mutation/overview?id=35643829	COSM1258335	COSV58343702	53682
JAK1	c.1598C>T	p.T533M	1	MDA-PCa-2b	1	65321242	65321242	Missense_Mutation	SNP	G	24	16	8	A	monoallelic	https://cancer.sanger.ac.uk/cosmic/mutation/overview?id=29891703	COSM7651778	COSV100692283	38078
TRIM33	c.503dup	p.S169Qfs*28	NA	MDA-PCa-2b	1	115053194	115053195	Frameshift_Indel	INS	-	11	7	4	C	monoallelic	NA	NA	NA	NA	NA
PDE4DIP	c.1571G>A	p.R524H	NA	MDA-PCa-2b	1	144917533	144917533	Missense_Mutation	SNP	C	65	41	24	T	monoallelic	NA	NA	NA	NA	NA
BCL9	c.2426G>T	p.R809M	NA	MDA-PCa-2b	1	147092387	147092387	Missense_Mutation	SNP	G	47	22	25	T	monoallelic	NA	NA	NA	NA	NA
ARNT	c.1174T>G	p.L392V	NA	MDA-PCa-2b	1	150799087	150799087	Missense_Mutation	SNP	A	29	15	14	C	monoallelic	NA	NA	NA	NA	NA
FCGR2B	c.128C>T	p.T43I	NA	MDA-PCa-2b	1	161640057	161640057	Missense_Mutation	SNP	C	17	4	13	T	monoallelic	NA	NA	NA	NA	NA
PTPRC	c.1405C>T	p.R469C	NA	MDA-PCa-2b	1	198685924	198685924	Missense_Mutation	SNP	C	41	22	19	T	monoallelic	NA	NA	NA	NA	NA
NUTM2B	c.2490_2499del	p.E831Pfs*15	NA	MDA-PCa-2b	10	81472094	81472103	Frameshift_Indel	DEL	TGAAAAGACA	45	34	11	-	multi_monoallelic	NA	NA	NA	NA	NA
NUTM2B	c.2502_2503del	p.Y835Pfs*29	NA	MDA-PCa-2b	10	81472106	81472107	Frameshift_Indel	DEL	CT	41	30	11	-	multi_monoallelic	NA	NA	NA	NA	NA
PTEN	c.365T>A	p.I122N	NA	MDA-PCa-2b	10	89692881	89692881	Missense_Mutation	SNP	T	26	14	12	A	biallelic_het	NA	NA	NA	NA	NA
PTEN	c.389G>A	p.R130Q	NA	MDA-PCa-2b	10	89692905	89692905	Missense_Mutation	SNP	G	25	12	13	A	biallelic_het	NA	NA	NA	NA	NA
TLX1	c.614G>A	p.R205H	5	MDA-PCa-2b	10	102893977	102893977	Missense_Mutation	SNP	G	27	16	11	A	monoallelic	https://cancer.sanger.ac.uk/cosmic/mutation/overview?id=35452712	COSM4734030	COSV64622496	38078
CREB3L1	c.681del	p.S228Pfs*35	1	MDA-PCa-2b	11	46332663	46332663	Frameshift_Indel	DEL	C	37	20	17	-	monoallelic	https://cancer.sanger.ac.uk/cosmic/mutation/overview?id=78839232	COSM1980096	COSV55831458	38078
SDHAF2	c.439A>G	p.K147E	1	MDA-PCa-2b	11	61213481	61213481	Missense_Mutation	SNP	A	41	14	27	G	monoallelic	https://cancer.sanger.ac.uk/cosmic/mutation/overview?id=26934107	COSM7121573	COSV57099001	38078
USP28	c.421C>T	p.R141C	NA	MDA-PCa-2b	11	113711433	113711433	Missense_Mutation	SNP	G	43	17	26	A	monoallelic	NA	NA	NA	NA	NA
BCL9L	c.3589C>G	p.P1197A	NA	MDA-PCa-2b	11	118770035	118770035	Missense_Mutation	SNP	G	25	13	12	C	monoallelic	NA	NA	NA	NA	NA
ARHGEF12	c.3931G>T	p.G1311*	NA	MDA-PCa-2b	11	120350833	120350833	Nonsense_Mutation	SNP	G	46	31	15	T	multi_monoallelic	NA	NA	NA	NA	NA
ARHGEF12	c.4146del	p.F1382Lfs*35	NA	MDA-PCa-2b	11	120351043	120351043	Frameshift_Indel	DEL	T	46	27	19	-	multi_monoallelic	NA	NA	NA	NA	NA
CHD4	c.3779G>A	p.R1260H	1	MDA-PCa-2b	12	6696650	6696650	Missense_Mutation	SNP	C	28	16	12	T	biallelic_het	https://cancer.sanger.ac.uk/cosmic/mutation/overview?id=33786332	COSM6628024	COSV58901913	38078
CHD4	c.218del	p.K73Rfs*129	23	MDA-PCa-2b	12	6711546	6711546	Frameshift_Indel	DEL	T	49	20	29	-	biallelic_het	https://cancer.sanger.ac.uk/cosmic/mutation/overview?id=33786393	COSM1363778	COSV58896055	41524
DDIT3	c.409C>T	p.R137W	2	MDA-PCa-2b	12	57910762	57910762	Missense_Mutation	SNP	G	41	23	18	A	monoallelic	https://cancer.sanger.ac.uk/cosmic/mutation/overview?id=85880449	COSM942079	COSV56253328	39540
TBX3	c.1060_1062del	p.S354del	NA	MDA-PCa-2b	12	115114155	115114157	Inframe_Indel	DEL	AGA	32	21	11	-	monoallelic	NA	NA	NA	NA	NA
NCOR2	c.5509_5517dup	p.S1837_G1839dup	27	MDA-PCa-2b	12	124824721	124824722	Inframe_Indel	INS	-	66	1	65	GCCGCTGCT	biallelic_hom	https://cancer.sanger.ac.uk/cosmic/mutation/overview?id=45371441	COSM1359887	COSV62292510	41645
NCOR2	c.1529_1531dup	p.Q510dup	12	MDA-PCa-2b	12	124887058	124887059	Inframe_Indel	INS	-	51	12	39	GCT	biallelic_hom	https://cancer.sanger.ac.uk/cosmic/mutation/overview?id=45371257	COSM1476307	COSV62292713	38078	thyroid/other/neoplasm=4/15=26.67%
LATS2	c.1591T>C	p.Y531H	NA	MDA-PCa-2b	13	21562328	21562328	Missense_Mutation	SNP	A	46	21	25	G	monoallelic	NA	NA	NA	NA	NA
FOXA1	c.901T>A	p.S301T	NA	MDA-PCa-2b	14	38061088	38061088	Missense_Mutation	SNP	A	39	25	14	T	monoallelic	NA	NA	NA	NA	NA
KTN1	c.2810A>T	p.E937V	1	MDA-PCa-2b	14	56122768	56122768	Missense_Mutation	SNP	A	35	16	19	T	monoallelic	https://cancer.sanger.ac.uk/cosmic/mutation/overview?id=42917910	COSM6698700	COSV63215634	38078
ARID4A	c.1201C>T	p.R401C	NA	MDA-PCa-2b	14	58814393	58814393	Missense_Mutation	SNP	C	42	23	19	T	monoallelic	NA	NA	NA	NA	NA
TCF12	c.922G>A	p.V308I	NA	MDA-PCa-2b	15	57525006	57525006	Missense_Mutation	SNP	G	34	15	19	A	monoallelic	NA	NA	NA	NA	NA
TSC2	c.2152C>T	p.R718C	2	MDA-PCa-2b	16	2122296	2122296	Missense_Mutation	SNP	C	37	19	18	T	monoallelic	https://cancer.sanger.ac.uk/cosmic/mutation/overview?id=24045231	COSM4059146	COSV54762046	38078
MYH11	c.4216_4218del	p.K1406del	NA	MDA-PCa-2b	16	15818186	15818188	Inframe_Indel	DEL	CTT	21	7	14	-	monoallelic	NA	NA	NA	NA	NA
PALB2	c.1334del	p.K445Rfs*7	NA	MDA-PCa-2b	16	23646533	23646533	Frameshift_Indel	DEL	T	28	11	17	-	monoallelic	NA	NA	NA	NA	NA
CBFA2T3	c.61T>C	p.S21P	NA	MDA-PCa-2b	16	89043155	89043155	Missense_Mutation	SNP	A	26	15	11	G	monoallelic	NA	NA	NA	NA	NA
USP6	c.3443C>T	p.S1148L	3	MDA-PCa-2b	17	5072276	5072276	Missense_Mutation	SNP	C	41	21	20	T	monoallelic	https://cancer.sanger.ac.uk/cosmic/mutation/overview?id=88157689	COSM1384531	COSV51480636	38078
NCOR1	c.1878_1879del	p.R627Mfs*10	NA	MDA-PCa-2b	17	16022773	16022774	Frameshift_Indel	DEL	GA	22	11	11	-	multi_monoallelic	NA	NA	NA	NA	NA
NCOR1	c.1852+1G>A	p.X618_splice	NA	MDA-PCa-2b	17	16024365	16024365	Splice_Site	SNP	C	31	16	15	T	multi_monoallelic	NA	NA	NA	NA	NA
SMARCE1	c.443G>A	p.R148H	NA	MDA-PCa-2b	17	38792281	38792281	Missense_Mutation	SNP	C	28	16	12	T	monoallelic	NA	NA	NA	NA	NA
STAT5B	c.1102dup	p.Q368Pfs*9	12	MDA-PCa-2b	17	40370235	40370236	Frameshift_Indel	INS	-	28	7	21	G	biallelic_hom	https://cancer.sanger.ac.uk/cosmic/mutation/overview?id=20175920	COSM1383342	COSV53181479	53749
UNC13D	c.1055C>T	p.A352V	NA	MDA-PCa-2b	17	73835920	73835920	Missense_Mutation	SNP	G	38	14	24	A	monoallelic	NA	NA	NA	NA	NA
MALT1	c.1411G>A	p.D471N	NA	MDA-PCa-2b	18	56401549	56401549	Missense_Mutation	SNP	G	46	22	24	A	monoallelic	NA	NA	NA	NA	NA
DNM2	c.2333del	p.P778Lfs*7	1	MDA-PCa-2b	19	10940839	10940839	Frameshift_Indel	DEL	C	34	17	17	-	monoallelic	https://cancer.sanger.ac.uk/cosmic/mutation/overview?id=40715955	COSM8495992	COSV99283982	38078
PRKACA	c.90del	p.K30Nfs*29	NA	MDA-PCa-2b	19	14218178	14218178	Frameshift_Indel	DEL	T	46	18	28	-	monoallelic	NA	NA	NA	NA	NA
CCNE1	c.533C>T	p.A178V	NA	MDA-PCa-2b	19	30311679	30311679	Missense_Mutation	SNP	C	22	6	16	T	monoallelic	NA	NA	NA	NA	NA
CIC	c.2159del	p.G720Afs*8	NA	MDA-PCa-2b	19	42795075	42795075	Frameshift_Indel	DEL	G	36	0	36	-	biallelic_hom	NA	NA	NA	NA	NA
BAX	c.121del	p.E41Rfs*19	58	MDA-PCa-2b	19	49458971	49458971	Frameshift_Indel	DEL	G	47	6	41	-	monoallelic	https://cancer.sanger.ac.uk/cosmic/mutation/overview?id=20172093	COSM309434	COSV53168804	38078	biliary_tract/carcinoma/NS=4/266=1.5%;large_intestine/carcinoma/adenocarcinoma=41/2391=1.71%
ITSN2	c.2170dup	p.T724Nfs*13	NA	MDA-PCa-2b	2	24494721	24494722	Frameshift_Indel	INS	-	21	9	12	T	monoallelic	NA	NA	NA	NA	NA
XPO1	c.2995A>T	p.T999S	NA	MDA-PCa-2b	2	61708394	61708394	Missense_Mutation	SNP	T	24	10	14	A	monoallelic	NA	NA	NA	NA	NA
LRP1B	c.2602G>A	p.D868N	6	MDA-PCa-2b	2	141751606	141751606	Missense_Mutation	SNP	C	40	19	21	T	monoallelic	https://cancer.sanger.ac.uk/cosmic/mutation/overview?id=41440460	COSM1007066	COSV63341598	38078
ACVR2A	c.1310del	p.K437Rfs*5	NA	MDA-PCa-2b	2	148683686	148683686	Frameshift_Indel	DEL	A	26	0	26	-	biallelic_hom	NA	NA	NA	NA	NA
ERBB4	c.1975G>T	p.G659C	NA	MDA-PCa-2b	2	212495291	212495291	Missense_Mutation	SNP	C	45	27	18	A	biallelic_het	NA	NA	NA	NA	NA
ERBB4	c.1252dup	p.S418Ffs*2	3	MDA-PCa-2b	2	212568865	212568866	Frameshift_Indel	INS	-	44	27	17	A	biallelic_het	https://cancer.sanger.ac.uk/cosmic/mutation/overview?id=30298615	COSM1683331	COSV53503627	66532
BARD1	c.513del	p.D172Mfs*40	NA	MDA-PCa-2b	2	215646085	215646085	Frameshift_Indel	DEL	T	41	23	18	-	monoallelic	NA	NA	NA	NA	NA
FEV	c.704dup	p.H236Pfs*18	NA	MDA-PCa-2b	2	219846401	219846402	Frameshift_Indel	INS	-	12	8	4	C	monoallelic	NA	NA	NA	NA	NA
CHD6	c.4199G>A	p.R1400H	3	MDA-PCa-2b	20	40053965	40053965	Missense_Mutation	SNP	C	30	14	16	T	monoallelic	https://cancer.sanger.ac.uk/cosmic/mutation/overview?id=36474680	COSM3291676	COSV64688320	38078
PTPRT	c.364G>A	p.V122I	NA	MDA-PCa-2b	20	41419957	41419957	Missense_Mutation	SNP	C	45	22	23	T	monoallelic	NA	NA	NA	NA	NA
NFATC2	c.1796C>T	p.T599M	4	MDA-PCa-2b	20	50071138	50071138	Missense_Mutation	SNP	G	45	20	25	A	monoallelic	https://cancer.sanger.ac.uk/cosmic/mutation/overview?id=43189743	COSM5499411	COSV65353372	38078
SALL4	c.2765C>T	p.A922V	2	MDA-PCa-2b	20	50401201	50401201	Missense_Mutation	SNP	G	23	12	11	A	monoallelic	https://cancer.sanger.ac.uk/cosmic/mutation/overview?id=23479564	COSM271696	COSV53850429	38078
OLIG2	c.614C>T	p.P205L	1	MDA-PCa-2b	21	34399784	34399784	Missense_Mutation	SNP	C	23	17	6	T	monoallelic	https://cancer.sanger.ac.uk/cosmic/mutation/overview?id=30891925	COSM5486927	COSV60973192	38078
DHX30	c.2851C>T	p.R951C	NA	MDA-PCa-2b	3	47890491	47890491	Missense_Mutation	SNP	C	48	28	20	T	monoallelic	NA	NA	NA	NA	NA
RHOA	c.13C>T	p.R5W	NA	MDA-PCa-2b	3	49413010	49413010	Missense_Mutation	SNP	G	18	12	6	A	monoallelic	NA	NA	NA	NA	NA
PBRM1	c.773dup	p.N258Kfs*6	NA	MDA-PCa-2b	3	52682399	52682400	Frameshift_Indel	INS	-	32	17	15	T	monoallelic	NA	NA	NA	NA	NA
FOXP1	c.1566_1567del	p.H522Qfs*10	NA	MDA-PCa-2b	3	71021797	71021798	Frameshift_Indel	DEL	TG	47	23	24	-	biallelic_het	NA	NA	NA	NA	NA
FOXP1	c.1099A>G	p.M367V	NA	MDA-PCa-2b	3	71037198	71037198	Missense_Mutation	SNP	T	49	30	19	C	biallelic_het	NA	NA	NA	NA	NA
TFG	c.1129G>A	p.G377R	NA	MDA-PCa-2b	3	100467301	100467301	Missense_Mutation	SNP	G	39	13	26	A	monoallelic	NA	NA	NA	NA	NA
AFF1	c.2336G>A	p.R779Q	NA	MDA-PCa-2b	4	88036321	88036321	Missense_Mutation	SNP	G	25	11	14	A	biallelic_het	NA	NA	NA	NA	NA
AFF1	c.2361dup	p.S788Efs*9	NA	MDA-PCa-2b	4	88036342	88036343	Frameshift_Indel	INS	-	28	15	13	G	biallelic_het	NA	NA	NA	NA	NA
AFF1	c.2362A>G	p.S788G	NA	MDA-PCa-2b	4	88036347	88036347	Missense_Mutation	SNP	A	28	15	13	G	biallelic_het	NA	NA	NA	NA	NA
SMARCAD1	c.1040del	p.N347Mfs*24	NA	MDA-PCa-2b	4	95173910	95173910	Frameshift_Indel	DEL	A	27	0	27	-	biallelic_hom	NA	NA	NA	NA	NA
FAT1	c.9526G>A	p.E3176K	2	MDA-PCa-2b	4	187532867	187532867	Missense_Mutation	SNP	C	39	20	19	T	monoallelic	https://cancer.sanger.ac.uk/cosmic/mutation/overview?id=57349945	COSM3131516	COSV71676034	54916
JADE2	c.1187G>A	p.R396Q	NA	MDA-PCa-2b	5	133902023	133902023	Missense_Mutation	SNP	G	31	18	13	A	monoallelic	NA	NA	NA	NA	NA
FLT4	c.344A>G	p.Y115C	NA	MDA-PCa-2b	5	180057611	180057611	Missense_Mutation	SNP	T	21	6	15	C	monoallelic	NA	NA	NA	NA	NA
DAXX	c.281G>A	p.R94H	NA	MDA-PCa-2b	6	33289271	33289271	Missense_Mutation	SNP	C	48	19	29	T	monoallelic	NA	NA	NA	NA	NA
FANCE	c.929del	p.P310Qfs*54	5	MDA-PCa-2b	6	35425715	35425715	Frameshift_Indel	DEL	C	39	25	14	-	monoallelic	https://cancer.sanger.ac.uk/cosmic/mutation/overview?id=22574179	COSM4683359	COSV57690795	38078
KMT2C	c.14057del	p.N4686Ifs*30	NA	MDA-PCa-2b	7	151842355	151842355	Frameshift_Indel	DEL	T	48	27	21	-	multi_monoallelic	NA	NA	NA	NA	NA
KMT2C	c.2107C>T	p.H703Y	NA	MDA-PCa-2b	7	151945412	151945412	Missense_Mutation	SNP	G	42	20	22	A	multi_monoallelic	NA	NA	NA	NA	NA
PREX2	c.2660C>T	p.A887V	NA	MDA-PCa-2b	8	69012023	69012023	Missense_Mutation	SNP	C	50	14	36	T	biallelic_het	NA	NA	NA	NA	NA
PREX2	c.3557A>G	p.D1186G	1	MDA-PCa-2b	8	69032483	69032483	Missense_Mutation	SNP	A	52	36	16	G	biallelic_het	https://cancer.sanger.ac.uk/cosmic/mutation/overview?id=25480798	COSM4912744	COSV55772693	38078
NDRG1	c.205C>T	p.H69Y	NA	MDA-PCa-2b	8	134276790	134276790	Missense_Mutation	SNP	G	47	24	23	A	monoallelic	NA	NA	NA	NA	NA
RECQL4	c.2296del	p.X766_splice	NA	MDA-PCa-2b	8	145738768	145738768	Splice_Site	DEL	G	77	0	77	-	biallelic_hom	NA	NA	NA	NA	NA
FANCG	c.1771del	p.L591Cfs*3	NA	MDA-PCa-2b	9	35074203	35074203	Frameshift_Indel	DEL	G	38	20	18	-	monoallelic	NA	NA	NA	NA	NA
KLF4	c.182G>A	p.R61H	NA	MDA-PCa-2b	9	110250493	110250493	Missense_Mutation	SNP	C	43	23	20	T	monoallelic	NA	NA	NA	NA	NA
NUP214	c.4133del	p.P1378Rfs*3	NA	MDA-PCa-2b	9	134073008	134073008	Frameshift_Indel	DEL	C	38	17	21	-	monoallelic	NA	NA	NA	NA	NA
COL5A1	c.2988del	p.G997Afs*77	NA	MDA-PCa-2b	9	137693829	137693829	Frameshift_Indel	DEL	C	39	24	15	-	multi_monoallelic	NA	NA	NA	NA	NA
COL5A1	c.3826G>T	p.G1276*	NA	MDA-PCa-2b	9	137704532	137704532	Nonsense_Mutation	SNP	G	38	18	20	T	multi_monoallelic	NA	NA	NA	NA	NA
COL5A1	c.4050del	p.G1351Efs*137	NA	MDA-PCa-2b	9	137707451	137707451	Frameshift_Indel	DEL	C	20	13	7	-	multi_monoallelic	NA	NA	NA	NA	NA
NOTCH1	c.3496G>A	p.G1166S	NA	MDA-PCa-2b	9	139402421	139402421	Missense_Mutation	SNP	C	44	23	21	T	monoallelic	NA	NA	NA	NA	NA
BCOR	c.4534A>G	p.I1512V	NA	MDA-PCa-2b	X	39916469	39916469	Missense_Mutation	SNP	T	28	0	28	C	biallelic_hom	NA	NA	NA	NA	NA
DDX3X	n.3041-2A>T		NA	MDA-PCa-2b	X	41217084	41217084	Splice_Site	SNP	A	23	0	23	T	biallelic_hom	NA	NA	NA	NA	NA
AR	c.2105T>A	p.L702H	64	MDA-PCa-2b	X	66931463	66931463	Missense_Mutation	SNP	T	17	0	17	A	biallelic_hom	https://cancer.sanger.ac.uk/cosmic/mutation/overview?id=38851271	COSM238553	COSV65953052	58047	prostate/carcinoma/NS=33/1953=1.69%
AR	c.2632A>G	p.T878A	70	MDA-PCa-2b	X	66943552	66943552	Missense_Mutation	SNP	A	16	1	15	G	biallelic_hom	https://cancer.sanger.ac.uk/cosmic/mutation/overview?id=38851267	COSM236693	COSV65953150	58047	prostate/carcinoma/NS=37/1953=1.89%
IRS4	c.1772dup	p.K592Qfs*12	18	MDA-PCa-2b	X	107977802	107977803	Frameshift_Indel	INS	-	21	13	8	C	monoallelic	https://cancer.sanger.ac.uk/cosmic/mutation/overview?id=35707214	COSM391267	COSV64532875	38078	NS/malignant_melanoma/NS=5/101=4.95%
BCORL1	c.5042del	p.P1681Qfs*20	59	MDA-PCa-2b	X	129190011	129190011	Frameshift_Indel	DEL	C	15	0	15	-	biallelic_hom	https://cancer.sanger.ac.uk/cosmic/mutation/overview?id=82739527	COSM1181075	COSV54389050	46257	stomach/carcinoma/NS=7/559=1.25%;stomach/carcinoma/adenocarcinoma=16/756=2.12%;large_intestine/carcinoma/adenocarcinoma=30/2391=1.25%
NOTCH2	c.660C>A	p.S220R	NA	PC3	1	120539711	120539711	Missense_Mutation	SNP	G	33	22	11	T	multi_monoallelic	NA	NA	NA	NA	NA
NOTCH2	c.629C>T	p.P210L	NA	PC3	1	120539742	120539742	Missense_Mutation	SNP	G	25	16	9	A	multi_monoallelic	NA	NA	NA	NA	NA
NOTCH2	c.455C>T	p.P152L	NA	PC3	1	120539916	120539916	Missense_Mutation	SNP	G	35	18	17	A	multi_monoallelic	NA	NA	NA	NA	NA
NOTCH2	c.316T>C	p.S106P	NA	PC3	1	120548051	120548051	Missense_Mutation	SNP	A	48	30	18	G	multi_monoallelic	NA	NA	NA	NA	NA
PRRX1	c.582dup	p.T195Dfs*19	NA	PC3	1	170695520	170695521	Frameshift_Indel	INS	-	27	20	7	G	monoallelic	NA	NA	NA	NA	NA
NUTM2D	c.325T>C	p.F109L	2	PC3	10	89120396	89120396	Missense_Mutation	SNP	T	14	0	14	C	biallelic_hom	https://cancer.sanger.ac.uk/cosmic/mutation/overview?id=48496950	COSM4591792	COSV67745869	38078
WT1	c.994C>G	p.Q332E	2	PC3	11	32438043	32438043	Missense_Mutation	SNP	G	21	18	3	C	monoallelic	https://cancer.sanger.ac.uk/cosmic/mutation/overview?id=30088274	COSM1675923	COSV60067907	71672
LMO2	c.107_112dup	p.G36_G37dup	NA	PC3	11	33891027	33891028	Inframe_Indel	INS	-	59	21	38	CGCCGC	monoallelic	NA	NA	NA	NA	NA
ADAMTS8	c.1745dup	p.D583*	NA	PC3	11	130281316	130281317	Frameshift_Indel	INS	-	21	16	5	G	monoallelic	NA	NA	NA	NA	NA
NCOR2	c.5509_5517dup	p.S1837_G1839dup	27	PC3	12	124824721	124824722	Inframe_Indel	INS	-	63	0	63	GCCGCTGCT	biallelic_hom	https://cancer.sanger.ac.uk/cosmic/mutation/overview?id=45371441	COSM1359887	COSV62292510	41645
NCOR2	c.3904dup	p.H1302Pfs*2	2	PC3	12	124832800	124832801	Frameshift_Indel	INS	-	17	11	6	G	biallelic_hom	https://cancer.sanger.ac.uk/cosmic/mutation/overview?id=45370963	COSM2226978	COSV62295225	38078
HIF1A	c.2047T>A	p.Y683N	NA	PC3	14	62207788	62207788	Missense_Mutation	SNP	T	43	21	22	A	monoallelic	NA	NA	NA	NA	NA
TP53	c.820G>T	p.V274F	53	PC3	17	7577118	7577118	Missense_Mutation	SNP	C	17	11	6	A	biallelic_hom	https://cancer.sanger.ac.uk/cosmic/mutation/overview?id=23647100	COSM10769	COSV52707923	167988
TP53	c.414del	p.K139Rfs*31	7	PC3	17	7578516	7578516	Frameshift_Indel	DEL	G	12	0	12	-	biallelic_hom	https://cancer.sanger.ac.uk/cosmic/mutation/overview?id=23670837	COSM18594	COSV52708439	167988
STK11	c.532_536del	p.K178Gfs*86	NA	PC3	19	1220438	1220442	Frameshift_Indel	DEL	CAAGC	14	11	3	-	monoallelic	NA	NA	NA	NA	NA
CIC	c.2117C>T	p.T706I	NA	PC3	19	42778052	42778052	Missense_Mutation	SNP	C	5	2	3	T	monoallelic	NA	NA	NA	NA	NA
FBXO11	c.1489del	p.I497Ffs*20	NA	PC3	2	48050409	48050409	Frameshift_Indel	DEL	T	15	9	6	-	monoallelic	NA	NA	NA	NA	NA
ACVR2A	c.836T>C	p.L279P	NA	PC3	2	148676035	148676035	Missense_Mutation	SNP	T	32	26	6	C	monoallelic	NA	NA	NA	NA	NA
ACVR1	c.271G>A	p.V91M	NA	PC3	2	158636909	158636909	Missense_Mutation	SNP	C	21	18	3	T	monoallelic	NA	NA	NA	NA	NA
PTPRT	c.2285T>A	p.L762Q	NA	PC3	20	40877354	40877354	Missense_Mutation	SNP	A	26	20	6	T	monoallelic	NA	NA	NA	NA	NA
NF2	c.1181_1183del	p.E394del	NA	PC3	22	30069309	30069311	Inframe_Indel	DEL	GAG	28	21	7	-	monoallelic	NA	NA	NA	NA	NA
APOBEC3B	c.812del	p.Q271Rfs*33	NA	PC3	22	39387425	39387425	Frameshift_Indel	DEL	A	11	8	3	-	monoallelic	NA	NA	NA	NA	NA
DROSHA	c.1516G>T	p.A506S	NA	PC3	5	31508799	31508799	Missense_Mutation	SNP	C	21	14	7	A	monoallelic	NA	NA	NA	NA	NA
RECQL4	c.2296del	p.X766_splice	NA	PC3	8	145738768	145738768	Splice_Site	DEL	G	47	0	47	-	biallelic_hom	NA	NA	NA	NA	NA
CDKN2A	c.250G>T	p.D84Y	28	PC3	9	21971108	21971108	Missense_Mutation	SNP	C	33	28	5	A	monoallelic	https://cancer.sanger.ac.uk/cosmic/mutation/overview?id=67050544	COSM13299	COSV58683210	100287
PAX5	c.590G>A	p.R197H	5	PC3	9	37002659	37002659	Missense_Mutation	SNP	C	33	25	8	T	monoallelic	https://cancer.sanger.ac.uk/cosmic/mutation/overview?id=33698178	COSM1195900	COSV63906247	57275
DDX3X	n.3041-2A>T		NA	PC3	X	41217084	41217084	Splice_Site	SNP	A	14	11	3	T	monoallelic	NA	NA	NA	NA	NA
AR	c.228_239dup	p.Q77_Q80dup	NA	PC3	X	66765158	66765159	Inframe_Indel	INS	-	8	0	8	GCAGCAGCAGCA	biallelic_hom	NA	NA	NA	NA	NA
LCK	c.1240T>C	p.Y414H	NA	RWPE-1	1	32745724	32745724	Missense_Mutation	SNP	T	29	17	12	C	monoallelic	NA	NA	NA	NA	NA
NOTCH2	c.455C>T	p.P152L	NA	RWPE-1	1	120539916	120539916	Missense_Mutation	SNP	G	43	36	7	A	multi_monoallelic	NA	NA	NA	NA	NA
NOTCH2	c.316T>C	p.S106P	NA	RWPE-1	1	120548051	120548051	Missense_Mutation	SNP	A	56	41	15	G	multi_monoallelic	NA	NA	NA	NA	NA
NUTM2D	c.325T>C	p.F109L	2	RWPE-1	10	89120396	89120396	Missense_Mutation	SNP	T	11	0	11	C	biallelic_hom	https://cancer.sanger.ac.uk/cosmic/mutation/overview?id=48496950	COSM4591792	COSV67745869	38078
NUTM2D	c.609G>C	p.Q203H	NA	RWPE-1	10	89120680	89120680	Missense_Mutation	SNP	G	19	12	7	C	biallelic_hom	NA	NA	NA	NA	NA
BCL9L	c.1342C>T	p.P448S	NA	RWPE-1	11	118773110	118773110	Missense_Mutation	SNP	G	17	9	8	A	monoallelic	NA	NA	NA	NA	NA
KDM5A	c.3974T>C	p.V1325A	NA	RWPE-1	12	416212	416212	Missense_Mutation	SNP	A	23	7	16	G	monoallelic	NA	NA	NA	NA	NA
NCOR2	c.5509_5517dup	p.S1837_G1839dup	27	RWPE-1	12	124824721	124824722	Inframe_Indel	INS	-	48	0	48	GCCGCTGCT	biallelic_hom	https://cancer.sanger.ac.uk/cosmic/mutation/overview?id=45371441	COSM1359887	COSV62292510	41645
POLD1	c.2861C>T	p.T954M	1	RWPE-1	19	50919693	50919693	Missense_Mutation	SNP	C	38	21	17	T	monoallelic	https://cancer.sanger.ac.uk/cosmic/mutation/overview?id=53530236	COSM9034597	COSV99569961	38078
LRP1B	c.3701_3702insTTGACTGTGTGCTTGTGCTGCTCAC	p.V1235*	NA	RWPE-1	2	141660553	141660554	Nonsense_Mutation	INS	-	13	12	1	GTGAGCAGCACAAGCACACAGTCAA	monoallelic	NA	NA	NA	NA	NA
MN1	c.1596_1598dup	p.Q550dup	NA	RWPE-1	22	28194933	28194934	Inframe_Indel	INS	-	10	0	10	TGC	biallelic_hom	NA	NA	NA	NA	NA
LEF1	c.40dup	p.D14Gfs*39	4	RWPE-1	4	109088883	109088884	Frameshift_Indel	INS	-	8	4	4	C	monoallelic	https://cancer.sanger.ac.uk/cosmic/mutation/overview?id=24853846	COSM2953418	COSV54464325	41719
TNFAIP3	c.-16+43_-16+66del		NA	RWPE-1	6	138188623	138188646	Splice_Site	DEL	CCCGGAGAGGTAACCGCCGCGCCT	20	11	9	-	monoallelic	NA	NA	NA	NA	NA
ARID1B	c.4625C>T	p.T1542M	NA	RWPE-1	6	157522353	157522353	Missense_Mutation	SNP	C	33	17	16	T	monoallelic	NA	NA	NA	NA	NA
SFRP4	c.117C>G	p.I39M	NA	RWPE-1	7	37956023	37956023	Missense_Mutation	SNP	G	47	24	23	C	monoallelic	NA	NA	NA	NA	NA
KAT6A	c.1223_1224insCCATCAATGAGCCCTTTGGTTTTCTTGTTGAACTTCAAGGAGACATTGCTATCTCTGCAGAAGTCCAACAAGAAAACCAAAGG	p.L409Hfs*3	NA	RWPE-1	8	41834665	41834666	Nonsense_Mutation	INS	-	8	7	1	CCTTTGGTTTTCTTGTTGGACTTCTGCAGAGATAGCAATGTCTCCTTGAAGTTCAACAAGAAAACCAAAGGGCTCATTGATGG	monoallelic	NA	NA	NA	NA	NA
RECQL4	c.2296del	p.X766_splice	NA	RWPE-1	8	145738768	145738768	Splice_Site	DEL	G	44	0	44	-	biallelic_hom	NA	NA	NA	NA	NA
TBC1D2	c.1849G>A	p.E617K	1	RWPE-1	9	100971251	100971251	Missense_Mutation	SNP	C	57	40	17	T	monoallelic	https://cancer.sanger.ac.uk/cosmic/mutation/overview?id=40146000	COSM7605003	COSV100580226	38078
DDX3X	n.3041-2A>T		NA	RWPE-1	X	41217084	41217084	Splice_Site	SNP	A	21	0	21	T	biallelic_hom	NA	NA	NA	NA	NA
AR	c.231_239dup	p.Q78_Q80dup	NA	RWPE-1	X	66765158	66765159	Inframe_Indel	INS	-	5	0	5	GCAGCAGCA	biallelic_hom	NA	NA	NA	NA	NA
FOXO4	c.796_797insCCTCAGACTCTGGCCTCAAGGGGGACAGCCGGGTGCTGACACTGCTGGCATTTGAACTGCA	p.S266Tfs*34	NA	RWPE-1	X	70320873	70320874	Frameshift_Indel	INS	-	23	20	3	GCACCTCAGACTCTGGCCTCAAGGGGGACAGCCGGGTGCTGACACTGCTGGCATTTGAACT	monoallelic	NA	NA	NA	NA	NA
NOTCH2	c.660C>A	p.S220R	NA	VCaP-CR	1	120539711	120539711	Missense_Mutation	SNP	G	43	34	9	T	multi_monoallelic	NA	NA	NA	NA	NA
NOTCH2	c.629C>T	p.P210L	NA	VCaP-CR	1	120539742	120539742	Missense_Mutation	SNP	G	51	39	12	A	multi_monoallelic	NA	NA	NA	NA	NA
NOTCH2	c.316T>C	p.S106P	NA	VCaP-CR	1	120548051	120548051	Missense_Mutation	SNP	A	78	59	19	G	multi_monoallelic	NA	NA	NA	NA	NA
MUC1	c.1223G>A	p.R408Q	1	VCaP-CR	1	155159831	155159831	Missense_Mutation	SNP	C	42	29	13	T	biallelic_het	https://cancer.sanger.ac.uk/cosmic/mutation/overview?id=36543216	COSM2210018	COSV58118760	38078
MUC1	c.401dup	p.A135Sfs*86	NA	VCaP-CR	1	155161731	155161732	Frameshift_Indel	INS	-	3	0	3	G	biallelic_het	NA	NA	NA	NA	NA
NUTM2D	c.325T>C	p.F109L	2	VCaP-CR	10	89120396	89120396	Missense_Mutation	SNP	T	18	0	18	C	biallelic_hom	https://cancer.sanger.ac.uk/cosmic/mutation/overview?id=48496950	COSM4591792	COSV67745869	38078
CCND1	c.656G>A	p.S219N	NA	VCaP-CR	11	69462843	69462843	Missense_Mutation	SNP	G	66	48	18	A	monoallelic	NA	NA	NA	NA	NA
NCOR2	c.5509_5517dup	p.S1837_G1839dup	27	VCaP-CR	12	124824721	124824722	Inframe_Indel	INS	-	79	0	79	GCCGCTGCT	biallelic_hom	https://cancer.sanger.ac.uk/cosmic/mutation/overview?id=45371441	COSM1359887	COSV62292510	41645
TP53	c.742C>T	p.R248W	975	VCaP-CR	17	7577539	7577539	Missense_Mutation	SNP	G	18	0	18	A	biallelic_hom	https://cancer.sanger.ac.uk/cosmic/mutation/overview?id=23640085	COSM10656	COSV52662035	167988	ovary/carcinoma/mucinous_carcinoma=7/175=4%;haematopoietic_and_lymphoid_tissue/lymphoid_neoplasm/Burkitt_lymphoma=4/282=1.42%;stomach/carcinoma/diffuse_adenocarcinoma=6/301=1.99%;vulva/carcinoma/squamous_cell_carcinoma=4/231=1.73%;skin/carcinoma/basal_cell_carcinoma=10/624=1.6%;breast/carcinoma_in_situ/ductal_carcinoma_in_situ=6/182=3.3%;large_intestine/carcinoma/NS=7/158=4.43%;large_intestine/ca…
CALR	c.247C>A	p.P83T	NA	VCaP-CR	19	13050295	13050295	Missense_Mutation	SNP	C	35	20	15	A	monoallelic	NA	NA	NA	NA	NA
MSH6	c.3261dup	p.F1088Lfs*5	NA	VCaP-CR	2	48030639	48030640	Frameshift_Indel	INS	-	24	9	15	C	monoallelic	NA	NA	NA	NA	NA
BCR	c.3275_3278dup	p.V1094Rfs*17	20	VCaP-CR	22	23653975	23653976	Frameshift_Indel	INS	-	42	31	11	CCGG	monoallelic	https://cancer.sanger.ac.uk/cosmic/mutation/overview?id=26925475	COSM3309494	COSV59926049	49100	large_intestine/carcinoma/adenocarcinoma=10/201=4.98%
PIK3CB	c.1810dup	p.R604Pfs*29	14	VCaP-CR	3	138413709	138413710	Frameshift_Indel	INS	-	47	39	8	G	monoallelic	https://cancer.sanger.ac.uk/cosmic/mutation/overview?id=64883172	COSM3124076	COSV56683685	54742
FAT4	c.14381G>A	p.R4794K	NA	VCaP-CR	4	126412358	126412358	Missense_Mutation	SNP	G	17	0	17	A	biallelic_hom	NA	NA	NA	NA	NA
RECQL4	c.2296del	p.X766_splice	NA	VCaP-CR	8	145738768	145738768	Splice_Site	DEL	G	44	0	44	-	biallelic_hom	NA	NA	NA	NA	NA
BCOR	c.1005dup	p.S336Lfs*45	6	VCaP-CR	X	39933593	39933594	Frameshift_Indel	INS	-	18	14	4	G	monoallelic	https://cancer.sanger.ac.uk/cosmic/mutation/overview?id=40021336	COSM4385748	COSV60706968	64259
TFE3	c.1445dup	p.P483Tfs*138	NA	VCaP-CR	X	48887951	48887952	Frameshift_Indel	INS	-	12	8	4	C	monoallelic	NA	NA	NA	NA	NA
AR	c.237_239del	p.Q80del	5	VCaP-CR	X	66765159	66765161	Inframe_Indel	DEL	GCA	276	41	235	-	biallelic_hom	https://cancer.sanger.ac.uk/cosmic/mutation/overview?id=38852091	COSM4594043	COSV65954886	58047
AR	c.1418_1420del	p.G473del	1	VCaP-CR	X	66766357	66766359	Inframe_Indel	DEL	GGC	285	35	250	-	biallelic_hom	https://cancer.sanger.ac.uk/cosmic/mutation/overview?id=38860882	COSM7339265	COSV65958513	19969
NOTCH2	c.316T>C	p.S106P	NA	VCaP	1	120548051	120548051	Missense_Mutation	SNP	A	48	37	11	G	monoallelic	NA	NA	NA	NA	NA
MUC1	c.1223G>A	p.R408Q	1	VCaP	1	155159831	155159831	Missense_Mutation	SNP	C	23	15	8	T	monoallelic	https://cancer.sanger.ac.uk/cosmic/mutation/overview?id=36543216	COSM2210018	COSV58118760	38078
NUTM2D	c.325T>C	p.F109L	2	VCaP	10	89120396	89120396	Missense_Mutation	SNP	T	15	0	15	C	biallelic_hom	https://cancer.sanger.ac.uk/cosmic/mutation/overview?id=48496950	COSM4591792	COSV67745869	38078
CCND1	c.656G>A	p.S219N	NA	VCaP	11	69462843	69462843	Missense_Mutation	SNP	G	36	19	17	A	monoallelic	NA	NA	NA	NA	NA
NCOR2	c.5509_5517dup	p.S1837_G1839dup	27	VCaP	12	124824721	124824722	Inframe_Indel	INS	-	52	1	51	GCCGCTGCT	biallelic_hom	https://cancer.sanger.ac.uk/cosmic/mutation/overview?id=45371441	COSM1359887	COSV62292510	41645
CREBBP	c.1212C>A	p.C404*	NA	VCaP	16	3843391	3843391	Nonsense_Mutation	SNP	G	9	7	2	T	monoallelic	NA	NA	NA	NA	NA
TP53	c.742C>T	p.R248W	975	VCaP	17	7577539	7577539	Missense_Mutation	SNP	G	8	0	8	A	biallelic_hom	https://cancer.sanger.ac.uk/cosmic/mutation/overview?id=23640085	COSM10656	COSV52662035	167988	ovary/carcinoma/mucinous_carcinoma=7/175=4%;haematopoietic_and_lymphoid_tissue/lymphoid_neoplasm/Burkitt_lymphoma=4/282=1.42%;stomach/carcinoma/diffuse_adenocarcinoma=6/301=1.99%;vulva/carcinoma/squamous_cell_carcinoma=4/231=1.73%;skin/carcinoma/basal_cell_carcinoma=10/624=1.6%;breast/carcinoma_in_situ/ductal_carcinoma_in_situ=6/182=3.3%;large_intestine/carcinoma/NS=7/158=4.43%;large_intestine/ca…
MSH6	c.3261dup	p.F1088Lfs*5	NA	VCaP	2	48030639	48030640	Frameshift_Indel	INS	-	23	10	13	C	monoallelic	NA	NA	NA	NA	NA
FAT4	c.14381G>A	p.R4794K	NA	VCaP	4	126412358	126412358	Missense_Mutation	SNP	G	25	0	25	A	biallelic_hom	NA	NA	NA	NA	NA
RECQL4	c.2296del	p.X766_splice	NA	VCaP	8	145738768	145738768	Splice_Site	DEL	G	40	0	40	-	biallelic_hom	NA	NA	NA	NA	NA
AR	c.237_239del	p.Q80del	5	VCaP	X	66765159	66765161	Inframe_Indel	DEL	GCA	110	21	89	-	biallelic_hom	https://cancer.sanger.ac.uk/cosmic/mutation/overview?id=38852091	COSM4594043	COSV65954886	58047
AR	c.1418_1420del	p.G473del	1	VCaP	X	66766357	66766359	Inframe_Indel	DEL	GGC	218	2	216	-	biallelic_hom	https://cancer.sanger.ac.uk/cosmic/mutation/overview?id=38860882	COSM7339265	COSV65958513	19969
1 MAF column specification as annotated by Vcf2maf (2020, doi:10.5281)
2 Gene-level Haplotype of a gene provides mutational status of each allele and distinguishes between a gene having multiple heterozygous mutations on the same versus opposite alleles.
3 Mutation identifier annotated by the Cancer Mutation Census (CMC) (PMID: 32461654)

## Sheet: Table S8
Table S8: List of simple and complex SVs in each cell line and the phase information used for complex SV calling by ChainLink method
Cell_line	chrom1	start1	stop1	chrom2	start2	stop2	name1	PS12	PS22	Haps13	Haps23	ChainLink4	Chainfinder4	Simple or Complex5	Zygosity	Type 6
LNCaP	chr12	7995916	7995918	chr12	8127000	8127002	CALL_189	10845	10845	0	0	Unchained	Unchained	Simple	HET	DEL
LNCaP	chr12	16339804	16339808	chr12	16392413	16392423	CALL_112	10845	10845	1	1	Unchained	Unchained	Simple	HET	DEL
LNCaP	chr12	17922533	17922535	chr12	18012071	18012073	CALL_107	10845	10845	.	.	Unchained	Unchained	Simple	HET	INV
LNCaP	chr20	1561091	1561097	chr20	1594146	1594159	CALL_88	11098	11098	0	0	Unchained	Unchained	Simple	HET	DEL
LNCaP	chr8	39232074	39232077	chr8	39387226	39387229	CALL_20	12116554	39340219	.	.	Unchained	Unchained	Simple	HOM	DEL
LNCaP	chr1	152555543	152555556	chr1	152587726	152587741	CALL_78	149509983	149509983	1	1	Unchained	Unchained	Simple	HET	DEL
LNCaP	chr11	1915264	1915265	chr11	1961050	1961069	CALL_149	21272	21272	0	0	Unchained	Unchained	Simple	HET	INV
LNCaP	chr22	24340967	24340969	chr22	24399039	24399041	CALL_147	21614987	21614987	0	0	Unchained	Unchained	Simple	HET	DEL
LNCaP	chr2	34695829	34695843	chr2	34736554	34736568	CALL_94	22689206	22689206	0	0	Unchained	Unchained	Simple	HET	DEL
LNCaP	chr20	14886516	14886533	chr20	14937159	14937172	CALL_99	3348069	3348069	1	1	Unchained	Unchained	Simple	HET	DEL
LNCaP	chr1	8463818	8463834	chr1	9756916	9756919	CALL_237	3945906	3945906	0	0	1	Unchained	Complex	HET	UNK
LNCaP	chr1	11432471	11432486	chr1	26949337	26949347	CALL_185	3945906	26306481	0	0	1	Unchained	Complex	HET	UNK
LNCaP	chr2	47677654	47677669	chr2	47983362	47983373	CALL_197	46245230	47990200	.	.	Unchained	Unchained	Simple	HET	DEL
LNCaP	chr5	57147384	57147399	chr5	58351948	58351963	CALL_225	49413737	49413737	0	0	Unchained	Unchained	Simple	HET	UNK
LNCaP	chr4	69373785	69373800	chr4	69491081	69491096	CALL_134	52611475	52611475	1	1	2	Unchained	Complex	HET	DEL
LNCaP	chr4	92288790	92288803	chr4	92426213	92426226	CALL_144	52611475	52611475	1	1	2	Unchained	Complex	HET	DEL
LNCaP	chr1	72766324	72766339	chr1	72811825	72811840	CALL_98	59108684	59108684	0	0	Unchained	Unchained	Simple	HET	DEL
LNCaP	chr14	86457725	86457738	chr14	86489569	86489582	CALL_87	59792944	59792944	1	1	Unchained	Unchained	Simple	HET	DEL
LNCaP	chr10	90929194	90929196	chr10	90973187	90973189	CALL_186	90747101	90747101	1	1	Unchained	Unchained	Simple	HET	DEL
LNCaP	chr3	129763382	129763397	chr3	129806731	129806746	CALL_18	93460306	93460306	.	.	3	Unchained	Complex	HOM	DEL
LNCaP	chr3	175104272	175104285	chr3	175182689	175182706	CALL_127	93460306	93460306	1	1	3	1	Complex	HET	INV
LNCaP	chr3	175159742	175159758	chr3	175227732	175227749	CALL_224	93460306	93460306	1	1	3	1	Complex	HET	DEL
LNCaP	chr3	175211025	175211026	chr3	175257191	175257204	CALL_100	93460306	93460306	1	1	3	1	Complex	HET	INV
LNCaP	chr4	34779892	34779905	chr4	34828934	34828944	CALL_108	9384435	9384435	0	0	Unchained	Unchained	Simple	HET	DEL
LNCaP_Abl	chr10	104257516	104257520	chr10	104494896	104494897	CALL_545	102038708	102038708	0	0	Unchained	Unchained	Simple	HET	DEL
LNCaP_Abl	chr1	110813423	110813426	chr1	110945276	110945279	CALL_490	103915263	103915263	1	1	Unchained	Unchained	Simple	HET	DUP
LNCaP_Abl	chr6	109142642	109142645	chr6	109287604	109287607	CALL_499	107310336	107310336	0	0	Unchained	Unchained	Simple	HET	DUP
LNCaP_Abl	chr20	1561080	1561089	chr20	1594170	1594178	CALL_118	11098	11098	.	.	1	Unchained	Complex	HOM	DEL
LNCaP_Abl	chr20	14886512	14886525	chr20	14937159	14937172	CALL_280	11098	11098	0	0	1	Unchained	Complex	HET	DEL
LNCaP_Abl	chr20	15451223	15451233	chr20	15585802	15585815	CALL_547	11098	11098	0	0	1	Unchained	Complex	HET	DEL
LNCaP_Abl	chr20	16781763	16781777	chr20	18240162	18240178	CALL_510	11098	11098	0	0	1	Unchained	Complex	HET	UNK
LNCaP_Abl	chr2	129549871	129549875	chr2	129661671	129661674	CALL_519	114326091	114326091	1	1	Unchained	Unchained	Simple	HET	DUP
LNCaP_Abl	chr4	151199518	151199519	chr4	151345504	151345505	CALL_560	132681961	132681961	1	1	Unchained	Unchained	Simple	HET	DEL
LNCaP_Abl	chr12	2911292	2911307	chr12	3097628	3097643	CALL_546	146677	146677	0	0	2	Unchained	Complex	HET	DEL
LNCaP_Abl	chr12	7995744	7995746	chr12	8126007	8126009	CALL_451	146677	8045089	1	0	2	Unchained	Complex	HET	DEL
LNCaP_Abl	chr1	152555550	152555563	chr1	152587731	152587741	CALL_184	149484072	149484072	1	1	Unchained	Unchained	Simple	HET	DEL
LNCaP_Abl	chr1	16146015	16146034	chr1	16215765	16215785	CALL_564	15182379	15182379	0	0	Unchained	Unchained	Simple	HET	DUP
LNCaP_Abl	chr2	188554456	188554466	chr2	188630315	188630327	CALL_390	181788988	181788988	0	0	Unchained	Unchained	Simple	HET	DUP
LNCaP_Abl	chr2	189113520	189113523	chr2	189418134	189418135	CALL_571	181788988	181788988	1	1	3	Unchained	Complex	HET	DEL
LNCaP_Abl	chr2	203303589	203303590	chr2	203554499	203554502	CALL_357	181788988	181788988	.	.	3	Unchained	Complex	HOM	DUP
LNCaP_Abl	chr2	205635053	205635055	chr2	205857856	205857858	CALL_523	181788988	181788988	.	.	3	Unchained	Complex	HOM	DUP
LNCaP_Abl	chr2	218885614	218885617	chr2	219019984	219019987	CALL_399	181788988	181788988	.	.	3	Unchained	Complex	HOM	DUP
LNCaP_Abl	chr2	220049737	220049753	chr2	222435543	222435559	CALL_553	181788988	181788988	1	1	3	Unchained	Complex	HET	UNK
LNCaP_Abl	chr2	220110075	220110089	chr2	222669235	222669249	CALL_496	181788988	181788988	1	1	3	Unchained	Complex	HET	UNK
LNCaP_Abl	chr2	229067438	229067440	chr2	229288862	229288864	CALL_488	181788988	181788988	.	.	3	Unchained	Complex	HOM	DUP
LNCaP_Abl	chr14	37985628	37985633	chr7	14197899	14197904	CALL_371	20237448	6883832	0	0	4	2	Complex	HET	UNK
LNCaP_Abl	chr14	38042391	38042396	chr7	7940775	7940780	CALL_350	20237448	6883832	0	0	4	2	Complex	HET	UNK
LNCaP_Abl	chr14	44918921	44918936	chr14	45568990	45569005	CALL_521	20237448	20237448	.	.	4	Unchained	Complex	HOM	UNK
LNCaP_Abl	chr14	86457724	86457727	chr14	86489583	86489586	CALL_233	20237448	20237448	1	1	Unchained	Unchained	Simple	HET	DEL
LNCaP_Abl	chr11	4710758	4710775	chr11	4802218	4802234	CALL_400	2148402	2148402	1	1	5	Unchained	Complex	HET	DUP
LNCaP_Abl	chr11	10125869	10125885	chr11	10300134	10300144	CALL_401	2148402	10210826	1	1	5	Unchained	Complex	HET	DEL
LNCaP_Abl	chr16	22340054	22340055	chr16	22415372	22415373	CALL_495	21616715	21616715	1	1	Unchained	Unchained	Simple	HET	DEL
LNCaP_Abl	chr11	1915271	1915272	chr11	1961076	1961077	CALL_324	246071	246071	0	0	Unchained	Unchained	Simple	HET	INV
LNCaP_Abl	chr8	39232074	39232077	chr8	39387226	39387229	CALL_136	26436971	39388788	.	.	Unchained	Unchained	Simple	HOM	DEL
LNCaP_Abl	chr6	32440324	32440335	chr6	32497110	32497123	CALL_305	26669347	26669347	0	0	6	Unchained	Complex	HET	UNK
LNCaP_Abl	chr6	32490656	32490657	chr6	32526773	32526774	CALL_355	26669347	26669347	0	0	6	Unchained	Complex	HET	UNK
LNCaP_Abl	chr22	29604611	29604625	chr22	29815861	29815875	CALL_535	29055601	29055601	.	.	Unchained	Unchained	Simple	HOM	DUP
LNCaP_Abl	chr2	34695829	34695842	chr2	34736557	34736568	CALL_279	29660102	29660102	0	0	Unchained	Unchained	Simple	HET	DEL
LNCaP_Abl	chr2	38442945	38442960	chr2	75063935	75063950	CALL_406	29660102	74990837	1	1	Unchained	Unchained	Simple	HET	UNK
LNCaP_Abl	chr20	39851330	39851333	chr20	40016373	40016376	CALL_548	29754208	29754208	1	1	Unchained	Unchained	Simple	HET	DUP
LNCaP_Abl	chr1	72766324	72766339	chr1	72811856	72811871	CALL_234	31918459	31918459	1	1	Unchained	Unchained	Simple	HET	DEL
LNCaP_Abl	chr4	42089111	42089114	chr4	42216857	42216858	CALL_505	34833772	34833772	1	1	Unchained	Unchained	Simple	HET	DUP
LNCaP_Abl	chr1	8427812	8427827	chr1	11429037	11429052	CALL_512	3945906	3945906	0	0	7	Unchained	Complex	HET	UNK
LNCaP_Abl	chr1	8463839	8463856	chr1	9756902	9756919	CALL_500	3945906	3945906	0	0	7	Unchained	Complex	HET	UNK
LNCaP_Abl	chr1	9754619	9754633	chr1	12168300	12168314	CALL_440	3945906	3945906	0	0	7	Unchained	Complex	HET	UNK
LNCaP_Abl	chr1	10773901	10773917	chr1	15070794	15070810	CALL_461	3945906	13576089	0	0	7	Unchained	Complex	HET	UNK
LNCaP_Abl	chr1	11432445	11432460	chr1	26949349	26949353	CALL_462	3945906	26124481	0	1	7	Unchained	Complex	HET	UNK
LNCaP_Abl	chr19	41223728	41223745	chr19	49636920	49636937	CALL_427	40427211	48461680	0	1	Unchained	Unchained	Simple	HET	UNK
LNCaP_Abl	chr2	46172809	46172825	chr2	46288013	46288029	CALL_530	42034683	42034683	0	0	Unchained	Unchained	Simple	HET	DEL
LNCaP_Abl	chr17	49492522	49492539	chr17	49564461	49564480	CALL_379	44615388	44615388	0	0	Unchained	Unchained	Simple	HET	DUP
LNCaP_Abl	chr2	47677653	47677668	chr2	47983411	47983424	CALL_295	47668198	47933967	.	.	Unchained	Unchained	Simple	HOM	DEL
LNCaP_Abl	chr5	57147390	57147398	chr5	58351949	58351956	CALL_454	49406741	49406741	0	0	Unchained	Unchained	Simple	HET	UNK
LNCaP_Abl	chr10	86115758	86115772	chr10	96581448	96581462	CALL_492	51730828	96570398	0	1	8	Unchained	Complex	HET	UNK
LNCaP_Abl	chr10	86232016	86232030	chr10	96195516	96195530	CALL_493	51730828	95489552	0	1	8	Unchained	Complex	HET	UNK
LNCaP_Abl	chr3	61155403	61155406	chr3	61456145	61456148	CALL_497	57734936	57734936	.	.	Unchained	Unchained	Simple	HOM	DUP
LNCaP_Abl	chr3	56124897	56124898	chr3	56163403	56163404	CALL_354	5989810	5989810	1	1	Unchained	Unchained	Simple	HET	DEL
LNCaP_Abl	chr11	62579390	62579395	chr11	62707799	62707802	CALL_528	61065439	61065439	1	1	Unchained	Unchained	Simple	HET	DUP
LNCaP_Abl	chr6	76422052	76422055	chr6	76646625	76646628	CALL_337	62153316	62153316	.	.	9	Unchained	Complex	HOM	DUP
LNCaP_Abl	chr7	70319988	70319989	chr7	70365078	70365079	CALL_482	65326091	65326091	0	0	Unchained	Unchained	Simple	HET	DUP
LNCaP_Abl	chr4	69373771	69373786	chr4	69491157	69491168	CALL_382	68317281	68317281	1	1	Unchained	Unchained	Simple	HET	DEL
LNCaP_Abl	chr7	7940214	7940216	chr7	14198669	14198671	CALL_561	6883832	6883832	0	0	4	2	Complex	HET	DISTAL
LNCaP_Abl	chr16	72109716	72109717	chr6	42175467	42175471	CALL_479	70003540	26669347	0	1	Unchained	Unchained	Simple	HET	UNK
LNCaP_Abl	chr5	78726645	78726660	chr5	78799065	78799080	CALL_360	70151279	70151279	1	1	13	Unchained	Complex	HET	DEL
LNCaP_Abl	chr5	85063843	85063857	chr5	85337828	85337830	CALL_473	70151279	70151279	.	.	13	Unchained	Complex	HOM	DUP
LNCaP_Abl	chr9	72910249	72910264	chr9	72963464	72963480	CALL_455	70840971	70840971	0	0	Unchained	Unchained	Simple	HET	DEL
LNCaP_Abl	chr4	1662912	1662925	chr4	1750720	1750731	CALL_359	74156	74156	0	0	Unchained	Unchained	Simple	HET	DUP
LNCaP_Abl	chr16	85623053	85623056	chr16	85696702	85696703	CALL_518	74425530	74425530	0	0	Unchained	Unchained	Simple	HET	DEL
LNCaP_Abl	chr1	86035494	86035498	chr15	77331492	77331496	CALL_417	83717281	75531526	.	.	Unchained	Unchained	Simple	HET	UNK
LNCaP_Abl	chr8	87292187	87292190	chr8	87426228	87426231	CALL_446	86846037	86846037	.	.	14	Unchained	Complex	HET	DEL
LNCaP_Abl	chr8	127885697	127885706	chr8	128249985	128249996	CALL_544	86846037	86846037	.	.	14	Unchained	Complex	HOM	DUP
LNCaP_Abl	chr18	9191639	9191654	chr18	9297075	9297090	CALL_567	9046794	9046794	1	1	Unchained	Unchained	Simple	HET	DEL
LNCaP_Abl	chr4	92288790	92288806	chr4	92426232	92426248	CALL_373	90707227	92367958	0	1	9	Unchained	Complex	HET	DEL
LNCaP_Abl	chr4	97998752	97998753	chr6	87535389	87535390	CALL_445	92367958	62153316	1	1	9	Unchained	Complex	HET	UNK
LNCaP_Abl	chr4	100505693	100505706	chr4	102127380	102127389	CALL_404	92367958	92367958	0	0	Unchained	Unchained	Simple	HET	UNK
LNCaP_Abl	chr4	111086178	111086181	chr4	111171697	111171700	CALL_472	92367958	92367958	1	1	9	Unchained	Complex	HET	DUP
LNCaP_Abl	chr4	9457094	9457096	chr4	9511856	9511858	CALL_572	9326180	9326180	.	.	10	Unchained	Complex	HET	INV
LNCaP_Abl	chr4	34779955	34779968	chr4	34828935	34828943	CALL_339	9326180	34829174	0	1	10	Unchained	Complex	HET	DEL
LNCaP_Abl	chr3	129763383	129763396	chr3	129806735	129806746	CALL_116	93510502	93510502	.	.	11	Unchained	Complex	HOM	DEL
LNCaP_Abl	chr3	174781864	174781866	chr3	174901447	174901449	CALL_562	93510502	93510502	0	0	11	Unchained	Complex	HET	DEL
LNCaP_Abl	chr3	175104282	175104283	chr3	175182693	175182694	CALL_296	93510502	93510502	0	0	11	1	Complex	HET	INV
LNCaP_Abl	chr3	175159745	175159746	chr3	175227733	175227749	CALL_536	93510502	93510502	0	0	11	1	Complex	HET	DEL
LNCaP_Abl	chr3	175211032	175211044	chr3	175257192	175257207	CALL_381	93510502	93510502	0	0	11	1	Complex	HET	INV
LNCaP_Abl	chrX	11133218	11133232	chrX	11235822	11235836	CALL_551	9379978	9379978	0	0	Unchained	Unchained	Simple	HET	DUP
LNCaP_Abl	chr5	103290028	103290030	chr5	105934895	105934897	CALL_580	94545170	94545170	1	1	12	Unchained	Complex	HET	DISTAL
LNCaP_Abl	chr5	103431201	103431202	chr5	105919918	105919932	CALL_537	94545170	94545170	1	1	12	Unchained	Complex	HET	UNK
LNCaP_Abl	chr12	16339803	16339806	chr12	16392426	16392429	CALL_266	9459849	9459849	0	0	Unchained	Unchained	Simple	HET	DEL
LNCaP_Abl	chr12	17924034	17924036	chr12	18013137	18013139	CALL_220	9459849	9459849	1	1	Unchained	Unchained	Simple	HET	INV
LNCaP_Abl	chr12	20023819	20023822	chr12	20266451	20266456	CALL_469	9459849	9459849	.	.	Unchained	Unchained	Simple	HOM	DUP
LNCaP_Abl	chr10	96453397	96453402	chr6	160112763	160112768	CALL_376	95489552	160113309	1	1	Unchained	Unchained	Simple	HET	UNK
LNCaP_C42b	chr8	102298953	102298998	chr8	102454583	102454682	CALL_466	101769784	101769784	.	.	Unchained	Unchained	Simple	HOM	UNK
LNCaP_C42b	chr16	11611403	11611406	chr16	11981935	11981938	CALL_470	10214	10214	.	.	Unchained	Unchained	Simple	HOM	DUP
LNCaP_C42b	chr20	1561100	1561115	chr20	1594150	1594165	CALL_148	11098	11098	.	.	Unchained	Unchained	Simple	HOM	DEL
LNCaP_C42b	chr20	14886510	14886513	chr20	14937172	14937175	CALL_462	11098	11098	0	0	Unchained	Unchained	Simple	HET	DEL
LNCaP_C42b	chr20	15017885	15017900	chr20	15543776	15543791	CALL_636	11098	11098	1	1	Unchained	Unchained	Simple	HET	UNK
LNCaP_C42b	chr11	119226078	119226083	chr22	39843848	39843853	CALL_628	114438212	37237132	1	1	1	Unchained	Complex	HET	UNK
LNCaP_C42b	chr8	39232075	39232090	chr8	39387227	39387229	CALL_152	12117005	39340219	.	.	Unchained	Unchained	Simple	HOM	DEL
LNCaP_C42b	chr4	150738555	150738628	chr4	150773111	150773582	CALL_422	122560696	122560696	1	1	2	Unchained	Complex	HET	UNK
LNCaP_C42b	chr4	169711106	169711122	chr4	169818088	169818104	CALL_519	122560696	122560696	.	.	2	Unchained	Complex	HOM	DUP
LNCaP_C42b	chr21	17235103	17235119	chr21	17726101	17726117	CALL_621	14288286	14288286	.	.	3	Unchained	Complex	HOM	DUP
LNCaP_C42b	chr21	44856265	44856270	chr6	51375662	51375667	CALL_525	14288286	33675612	1	0	3	Unchained	Complex	HET	UNK
LNCaP_C42b	chr1	152555542	152555558	chr1	152587735	152587745	CALL_311	149546642	149546642	1	1	Unchained	Unchained	Simple	HET	DEL
LNCaP_C42b	chr2	153187972	153187989	chr2	153344024	153344040	CALL_611	149741035	153313876	1	1	Unchained	Unchained	Simple	HET	UNK
LNCaP_C42b	chr3	173956110	173956131	chr3	174170810	174170829	CALL_604	153838331	153838331	.	.	4	Unchained	Complex	HOM	DUP
LNCaP_C42b	chr3	175104270	175104287	chr3	175182692	175182702	CALL_337	153838331	153838331	0	0	4	Unchained	Complex	HET	INV
LNCaP_C42b	chr3	175211024	175211041	chr3	175257193	175257204	CALL_390	153838331	153838331	0	0	4	Unchained	Complex	HET	INV
LNCaP_C42b	chr11	1915270	1915271	chr11	1961045	1961063	CALL_394	1575136	1575136	1	1	5	Unchained	Complex	HET	INV
LNCaP_C42b	chr11	14207794	14207809	chr11	17411704	17411719	CALL_515	1575136	1575136	1	1	5	Unchained	Complex	HET	UNK
LNCaP_C42b	chr11	14284267	14284286	chr11	17841182	17841201	CALL_619	1575136	1575136	1	1	5	Unchained	Complex	HET	UNK
LNCaP_C42b	chr2	203303587	203303590	chr2	203554499	203554502	CALL_239	181803779	203343596	.	.	Unchained	Unchained	Simple	HOM	DUP
LNCaP_C42b	chr12	7995841	7995843	chr12	8125068	8125070	CALL_378	186588	186588	1	1	6	Unchained	Complex	HET	DEL
LNCaP_C42b	chr12	16339803	16339818	chr12	16392417	16392429	CALL_267	186588	186588	0	0	6	Unchained	Complex	HET	DEL
LNCaP_C42b	chr12	17923198	17923200	chr12	18013039	18013041	CALL_237	186588	186588	.	.	6	Unchained	Complex	HET	INV
LNCaP_C42b	chr13	21539272	21539290	chr13	23138689	23138706	CALL_516	18970748	18970748	1	1	7	2	Complex	HET	UNK
LNCaP_C42b	chr13	21539289	21539291	chr13	28824440	28824442	CALL_483	18970748	18970748	1	1	7	2	Complex	HET	DISTAL
LNCaP_C42b	chr13	22012596	22012613	chr13	84250295	84250312	CALL_384	18970748	75372085	1	1	7	Unchained	Complex	HET	UNK
LNCaP_C42b	chr13	22060491	22060492	chr13	93751989	93751999	CALL_421	18970748	86860400	1	0	7	Unchained	Complex	HET	UNK
LNCaP_C42b	chr13	23147832	23147849	chr13	28824380	28824381	CALL_601	18970748	18970748	1	1	7	2	Complex	HET	UNK
LNCaP_C42b	chr13	24119943	24119956	chr13	84325576	84325586	CALL_379	18970748	75372085	1	1	7	Unchained	Complex	HET	UNK
LNCaP_C42b	chr13	24340498	24340506	chr13	32652215	32652231	CALL_461	18970748	18970748	1	1	7	Unchained	Complex	HET	UNK
LNCaP_C42b	chr13	32883352	32883366	chr13	94016767	94016783	CALL_426	18970748	86860400	1	0	7	Unchained	Complex	HET	UNK
LNCaP_C42b	chr13	35098760	35098762	chr13	38867820	38867822	CALL_583	18970748	18970748	1	1	7	Unchained	Complex	HET	DISTAL
LNCaP_C42b	chr13	35146995	35147012	chr13	90264013	90264029	CALL_434	18970748	86860400	1	0	7	Unchained	Complex	HET	UNK
LNCaP_C42b	chr13	35462608	35462619	chr13	37950811	37950828	CALL_507	18970748	18970748	1	1	7	3	Complex	HET	UNK
LNCaP_C42b	chr13	35484357	35484374	chr13	90603236	90603255	CALL_449	18970748	86860400	1	0	7	3	Complex	HET	UNK
LNCaP_C42b	chr13	37950828	37950830	chr13	90603158	90603160	CALL_523	18970748	86860400	1	0	7	3	Complex	HET	DISTAL
LNCaP_C42b	chr13	38943725	38943735	chr13	39030573	39030586	CALL_517	18970748	18970748	1	1	7	Unchained	Complex	HET	INV
LNCaP_C42b	chr13	68139512	68139528	chr13	75984607	75984623	CALL_345	18970748	75372085	1	1	7	Unchained	Complex	HET	UNK
LNCaP_C42b	chr1	246456523	246456531	chr1	246506225	246506239	CALL_505	236278721	236278721	1	1	Unchained	Unchained	Simple	HET	DEL
LNCaP_C42b	chr14	30057119	30057136	chr14	30205847	30205866	CALL_484	27113000	27113000	.	.	8	Unchained	Complex	HOM	DUP
LNCaP_C42b	chr14	30297303	30297304	chr14	30505999	30506002	CALL_307	27113000	27113000	.	.	8	Unchained	Complex	HOM	DUP
LNCaP_C42b	chr14	37985633	37985634	chr7	14197901	14197906	CALL_548	27113000	1	1	1	8	Unchained	Complex	HET	UNK
LNCaP_C42b	chr14	38042391	38042396	chr7	7940776	7940780	CALL_524	27113000	1	0	1	8	Unchained	Complex	HET	UNK
LNCaP_C42b	chr20	42126967	42126981	chr20	42549305	42549319	CALL_587	29754208	29754208	.	.	Unchained	Unchained	Simple	HOM	UNK
LNCaP_C42b	chr6	32440891	32440901	chr6	32497524	32497525	CALL_563	31236188	31236188	0	0	Unchained	Unchained	Simple	HET	DEL
LNCaP_C42b	chr22	38682055	38682056	chr22	38918459	38918460	CALL_459	37237132	37237132	.	.	1	Unchained	Complex	HOM	DUP
LNCaP_C42b	chr1	8427812	8427823	chr1	11429040	11429051	CALL_564	3945906	3945906	0	0	9	Unchained	Complex	HET	UNK
LNCaP_C42b	chr1	8463817	8463834	chr1	9756902	9756919	CALL_382	3945906	3945906	0	0	9	1	Complex	HET	UNK
LNCaP_C42b	chr1	8834228	8834230	chr1	9154721	9154723	CALL_617	3945906	3945906	.	.	9	Unchained	Complex	HOM	DUP
LNCaP_C42b	chr1	9754618	9754633	chr1	12168299	12168314	CALL_361	3945906	3945906	0	0	9	1	Complex	HET	UNK
LNCaP_C42b	chr1	10741847	10741851	chr1	12155705	12155721	CALL_460	3945906	3945906	0	0	9	1	Complex	HET	UNK
LNCaP_C42b	chr1	10773881	10773892	chr1	15070797	15070810	CALL_336	3945906	14627606	0	1	9	Unchained	Complex	HET	UNK
LNCaP_C42b	chr1	11432459	11432502	chr1	26949343	26949352	CALL_480	3945906	26093930	0	1	9	Unchained	Complex	HET	UNK
LNCaP_C42b	chr19	41223728	41223744	chr19	49636781	49636797	CALL_487	40390758	49527064	1	0	Unchained	Unchained	Simple	HET	UNK
LNCaP_C42b	chr1	72766324	72766327	chr1	72811837	72811838	CALL_296	42123570	42123570	1	1	Unchained	Unchained	Simple	HET	DEL
LNCaP_C42b	chr17	49492520	49492531	chr17	49564463	49564472	CALL_492	44684341	44684341	1	1	Unchained	Unchained	Simple	HET	DUP
LNCaP_C42b	chr2	47677653	47677666	chr2	47983364	47983377	CALL_280	46024062	47934350	.	.	Unchained	Unchained	Simple	HOM	DEL
LNCaP_C42b	chr8	53805876	53805886	chr8	53988964	53988977	CALL_431	46839572	46839572	.	.	10	Unchained	Complex	HOM	DUP
LNCaP_C42b	chr8	67010824	67010827	chr8	67093674	67093677	CALL_331	46839572	46839572	1	1	10	Unchained	Complex	HET	DEL
LNCaP_C42b	chr2	34695829	34695832	chr2	34736565	34736568	CALL_279	5069788	5069788	0	0	Unchained	Unchained	Simple	HET	DEL
LNCaP_C42b	chr2	38442939	38442956	chr2	75063932	75063949	CALL_544	5069788	75020972	1	1	Unchained	Unchained	Simple	HET	UNK
LNCaP_C42b	chr10	52794110	52794119	chr10	52826910	52826924	CALL_633	51762223	51762223	1	1	Unchained	Unchained	Simple	HET	DEL
LNCaP_C42b	chr5	54953860	54953861	chr5	55021306	55021309	CALL_451	53484462	53484462	1	1	Unchained	Unchained	Simple	HET	DUP
LNCaP_C42b	chr5	57147383	57147399	chr5	58351948	58351964	CALL_493	53484462	53484462	0	0	Unchained	Unchained	Simple	HET	UNK
LNCaP_C42b	chr14	75379143	75379158	chr14	75516381	75516396	CALL_485	54655304	54655304	.	.	11	Unchained	Complex	HOM	DUP
LNCaP_C42b	chr14	86457731	86457741	chr14	86489573	86489584	CALL_301	54655304	54655304	0	0	11	Unchained	Complex	HET	DEL
LNCaP_C42b	chr11	55349448	55349450	chr11	55758506	55758508	CALL_627	54737770	54737770	0	0	Unchained	Unchained	Simple	HET	DEL
LNCaP_C42b	chr17	59957200	59957216	chr17	60014400	60014416	CALL_550	54950387	54950387	1	1	Unchained	Unchained	Simple	HET	DEL
LNCaP_C42b	chr3	61155390	61155403	chr3	61456146	61456159	CALL_365	61159261	61159261	.	.	12	Unchained	Complex	HOM	DUP
LNCaP_C42b	chr3	59760579	59760582	chr3	60157385	60157387	CALL_463	61215	61215	.	.	12	Unchained	Complex	HOM	DUP
LNCaP_C42b	chr3	61019347	61019350	chr3	61158811	61158814	CALL_552	61215	61159261	1	1	12	Unchained	Complex	HET	DEL
LNCaP_C42b	chr6	76422040	76422055	chr6	76646625	76646640	CALL_294	62153316	62153316	.	.	13	Unchained	Complex	HOM	DUP
LNCaP_C42b	chr4	69373729	69373790	chr4	69491080	69491089	CALL_347	68345089	68345089	1	1	Unchained	Unchained	Simple	HET	DEL
LNCaP_C42b	chr16	72109714	72109719	chr6	42175539	42175544	CALL_400	70208278	33675612	1	0	3	Unchained	Complex	HET	UNK
LNCaP_C42b	chr12	71729039	71729040	chr3	118694165	118694168	CALL_581	70552498	93458622	0	0	14	Unchained	Complex	HET	UNK
LNCaP_C42b	chr16	78990980	78990996	chr16	79219705	79219721	CALL_585	72639141	72639141	1	1	Unchained	Unchained	Simple	HET	DEL
LNCaP_C42b	chr10	75415178	75415179	chr16	29753289	29753290	CALL_482	74268534	28738910	1	0	15	Unchained	Complex	HET	UNK
LNCaP_C42b	chr10	86115758	86115777	chr10	96581442	96581461	CALL_453	74268534	95531291	1	0	15	Unchained	Complex	HET	UNK
LNCaP_C42b	chr10	86250979	86250980	chr10	96181620	96181621	CALL_595	74268534	95531291	1	1	15	Unchained	Complex	HET	UNK
LNCaP_C42b	chr4	92288790	92288793	chr4	92426226	92426229	CALL_369	75420568	92353242	1	0	Unchained	Unchained	Simple	HET	DEL
LNCaP_C42b	chr17	1787077	1787089	chr17	1831356	1831370	CALL_610	774096	774096	0	0	Unchained	Unchained	Simple	HET	DEL
LNCaP_C42b	chr12	81716882	81716906	chr12	81958148	81958172	CALL_608	80367869	80367869	.	.	Unchained	Unchained	Simple	HOM	DUP
LNCaP_C42b	chr1	86035492	86035497	chr15	77331490	77331491	CALL_398	81873770	52261298	1	0	Unchained	Unchained	Simple	HET	UNK
LNCaP_C42b	chr5	11881929	11881932	chr5	12310796	12310799	CALL_605	837805	837805	.	.	Unchained	Unchained	Simple	HOM	DUP
LNCaP_C42b	chr4	34779936	34779957	chr4	34828932	34828945	CALL_243	9326498	9326498	0	0	Unchained	Unchained	Simple	HET	DEL
LNCaP_C42b	chr3	129763382	129763389	chr3	129806732	129806746	CALL_189	93458622	93458622	0	0	14	Unchained	Complex	HET	DEL
LNCaP_C42b	chr10	96453397	96453402	chr6	160112763	160112768	CALL_414	95531291	160050187	1	0	Unchained	Unchained	Simple	HET	UNK
LNCaP_C42b	chr4	97998748	97998749	chr6	87535390	87535396	CALL_355	97559559	62153316	0	1	13	Unchained	Complex	HET	UNK
LNCaP_C42b	chr4	101836582	101836587	chr4	102112892	102112905	CALL_532	97559559	97559559	.	.	13	Unchained	Complex	HOM	DUP
LNCaP_C42b	chr4	120664424	120664439	chr4	120896920	120896935	CALL_573	97559559	97559559	.	.	13	Unchained	Complex	HOM	DUP
LNCaP_C42b	chr12	99710210	99710213	chr12	99841701	99841704	CALL_554	99459402	99812099	0	0	Unchained	Unchained	Simple	HET	DEL
VCaP	chr4	102444413	102444416	chr4	102490715	102490718	CALL_809	102441286	102441286	1	1	Unchained	Unchained	Simple	HET	DEL
VCaP	chr6	11480119	11480126	chr6	19835857	19835872	CALL_478	10934620	19549611	1	1	Unchained	Unchained	Simple	HET	UNK
VCaP	chr5	112343173	112343189	chr5	154425389	154425405	CALL_1094	112084075	148514366	1	0	1	Unchained	Complex	HET	UNK
VCaP	chr5	113314079	113314151	chr5	119079960	119079973	CALL_1106	112084075	117760167	1	1	1	Unchained	Complex	HET	UNK
VCaP	chr5	113919943	113919956	chr5	159966389	159966404	CALL_979	112084075	148514366	0	1	2	Unchained	Complex	HET	UNK
VCaP	chr3	114268800	114268813	chr3	115903018	115903031	CALL_1148	112377837	112377837	1	1	3	Unchained	Complex	HET	UNK
VCaP	chr3	117040740	117040742	chr3	117623474	117623476	CALL_1205	112377837	112377837	.	.	3	Unchained	Complex	HOM	DUP
VCaP	chr12	114991631	114991645	chr12	116103157	116103171	CALL_1076	113158788	116076799	1	0	Unchained	Unchained	Simple	HET	UNK
VCaP	chr10	116012492	116012494	chr14	61863837	61863839	CALL_1152	115060990	61489166	0	1	Unchained	Unchained	Simple	HET	DISTAL
VCaP	chr12	12688192	12688202	chr12	12883656	12883670	CALL_900	11616540	12784060	1	0	Unchained	Unchained	Simple	HET	DEL
VCaP	chr11	12872013	12872029	chr11	17216645	17216661	CALL_1197	11986087	17091243	1	0	Unchained	Unchained	Simple	HET	UNK
VCaP	chr8	120743788	120743802	chr8	137181348	137181359	CALL_1013	120452993	137044799	0	0	4	Unchained	Complex	HET	UNK
VCaP	chr8	121924244	121924261	chr8	139628623	139628640	CALL_1047	121876681	137044799	0	0	4	Unchained	Complex	HET	UNK
VCaP	chr8	127980485	127980496	chr8	128205044	128205059	CALL_608	121934294	121934294	.	.	Unchained	Unchained	Simple	HOM	DUP
VCaP	chr12	123456128	123456130	chr16	84746250	84746252	CALL_1198	122951086	84059200	1	1	5	Unchained	Complex	HET	DISTAL
VCaP	chr12	123456484	123456488	chr21	40547371	40547375	CALL_953	122951086	27478328	1	1	5	Unchained	Complex	HET	UNK
VCaP	chr5	127601518	127601520	chr5	157493382	157493384	CALL_1227	126481364	148514366	1	1	2	Unchained	Complex	HET	DISTAL
VCaP	chr3	129763364	129763372	chr3	129806733	129806746	CALL_999	129595404	129595404	0	0	Unchained	Unchained	Simple	HET	DEL
VCaP	chr6	135425243	135425253	chr6	135846251	135846268	CALL_980	132184149	135798608	0	0	Unchained	Unchained	Simple	HET	DEL
VCaP	chr5	136397952	136397965	chr5	179305311	179305324	CALL_1184	133129341	178315612	1	0	2	Unchained	Complex	HET	UNK
VCaP	chr5	136490516	136490534	chr5	180132128	180132146	CALL_1164	133129341	179947342	1	1	2	Unchained	Complex	HET	UNK
VCaP	chr20	1561072	1561082	chr20	1594174	1594187	CALL_495	1385338	1385338	.	.	Unchained	Unchained	Simple	HOM	DEL
VCaP	chr5	142584481	142584483	chr5	155608326	155608328	CALL_1126	142292827	148514366	1	1	2	Unchained	Complex	HET	DISTAL
VCaP	chr5	142787521	142787535	chr5	152524317	152524331	CALL_1185	142292827	148514366	1	1	2	Unchained	Complex	HET	UNK
VCaP	chr5	142787681	142787683	chr5	175115618	175115620	CALL_1095	142292827	174237060	1	0	2	Unchained	Complex	HET	DISTAL
VCaP	chr5	150389189	150389209	chr5	165457214	165457234	CALL_1186	148514366	164871764	1	0	2	Unchained	Complex	HET	UNK
VCaP	chr5	152528967	152528980	chr5	175115618	175115619	CALL_1187	148514366	174237060	1	0	2	Unchained	Complex	HET	UNK
VCaP	chr5	152665942	152665944	chr5	180479109	180479111	CALL_791	148514366	179947342	1	0	2	Unchained	Complex	HET	DISTAL
VCaP	chr5	157049010	157049012	chr5	180464660	180464662	CALL_1188	148514366	179947342	1	1	2	Unchained	Complex	HET	DISTAL
VCaP	chr5	158754335	158754356	chr5	170977284	170977303	CALL_1059	148514366	170433872	1	0	2	Unchained	Complex	HET	UNK
VCaP	chr5	161033971	161033977	chr5	173376273	173376287	CALL_1207	148514366	170433872	1	1	2	Unchained	Complex	HET	UNK
VCaP	chr1	152555542	152555558	chr1	152587725	152587741	CALL_533	149946721	149946721	.	.	Unchained	Unchained	Simple	HOM	DEL
VCaP	chr4	163105025	163105039	chr4	172337096	172337110	CALL_1149	161202005	171467548	0	0	Unchained	Unchained	Simple	HET	UNK
VCaP	chr5	165478111	165478126	chr5	165549398	165549444	CALL_1165	164871764	164871764	0	0	2	Unchained	Complex	HET	INV
VCaP	chr12	17923248	17923250	chr12	18071563	18071565	CALL_1214	16511366	16511366	.	.	6	Unchained	Complex	HOM	DUP
VCaP	chr12	17927781	17927782	chr12	18001131	18001136	CALL_774	16511366	16511366	.	.	6	Unchained	Complex	HET	UNK
VCaP	chr5	172602938	172602940	chr5	175933085	175933087	CALL_1060	170433872	174237060	0	1	2	Unchained	Complex	HET	DISTAL
VCaP	chr5	177627599	177627615	chr5	180103851	180103867	CALL_971	174237060	179947342	0	1	2	3	Complex	HET	UNK
VCaP	chr1	193352940	193352943	chr1	193580718	193580721	CALL_1195	190623295	193574164	0	1	Unchained	Unchained	Simple	HET	DEL
VCaP	chr6	20177570	20177575	chr9	109345780	109345785	CALL_916	19549611	108938530	1	0	8	Unchained	Complex	HET	UNK
VCaP	chr12	20459637	20459650	chr12	106664461	106664474	CALL_965	20398848	106583533	1	0	Unchained	Unchained	Simple	HET	UNK
VCaP	chr6	21146959	21146978	chr6	21432303	21432322	CALL_1151	20436718	20436718	1	1	Unchained	Unchained	Simple	HET	DEL
VCaP	chr21	39876353	39876368	chr21	42858024	42858033	CALL_894	27478328	27478328	1	1	5	1	Complex	HET	UNK
VCaP	chr6	32450735	32450743	chr6	32558403	32558413	CALL_823	31206485	31206485	.	.	7	Unchained	Complex	HOM	DUP
VCaP	chr6	33212528	33212538	chr6	33626495	33626510	CALL_1107	31206485	31206485	0	0	7	Unchained	Complex	HET	DEL
VCaP	chr2	34695829	34695844	chr2	34736553	34736568	CALL_970	32318460	32318460	0	0	Unchained	Unchained	Simple	HET	DEL
VCaP	chr8	35592942	35592955	chr8	41627121	41627125	CALL_1034	35505403	41563890	0	0	Unchained	Unchained	Simple	HET	UNK
VCaP	chr7	39282390	39282395	chr9	114919476	114919481	CALL_1190	35873821	108938530	0	0	8	Unchained	Complex	HET	UNK
VCaP	chr8	38155817	38155830	chr8	38187836	38187845	CALL_601	36394085	36394085	1	1	Unchained	Unchained	Simple	HET	INV
VCaP	chr17	37430786	37430804	chr17	39875083	39875101	CALL_1078	36982083	39754726	0	0	9	2	Complex	HET	UNK
VCaP	chr17	37448139	37448152	chr17	37532692	37532705	CALL_969	36982083	36982083	0	0	9	Unchained	Complex	HET	INV
VCaP	chr10	5000464	5000477	chr10	5050404	5050417	CALL_856	4129666	4129666	0	0	Unchained	Unchained	Simple	HET	INV
VCaP	chr3	43693901	43693915	chr3	57840661	57840675	CALL_1221	42132210	56370487	1	0	Unchained	Unchained	Simple	HET	UNK
VCaP	chr11	46131352	46131358	chr17	8263578	8263584	CALL_1114	42940850	8193257	1	1	Unchained	Unchained	Simple	HET	UNK
VCaP	chr22	45740548	45740550	chr22	46305004	46305006	CALL_1159	45383169	46284772	1	1	10	Unchained	Complex	HET	DISTAL
VCaP	chr11	47180837	47180839	chr13	96923656	96923658	CALL_1063	46821742	96446132	0	1	9	2	Complex	HET	DISTAL
VCaP	chr11	47181131	47181134	chr17	39865108	39865111	CALL_1128	46821742	39754726	0	0	9	2	Complex	HET	UNK
VCaP	chr11	47885867	47885869	chr17	37430839	37430841	CALL_1115	47864740	36982083	1	0	9	2	Complex	HET	DISTAL
VCaP	chr19	52369968	52369983	chr19	52578879	52578894	CALL_1132	50636022	50636022	.	.	Unchained	Unchained	Simple	HOM	DUP
VCaP	chr5	60356775	60356793	chr5	66071437	66071454	CALL_1045	60228318	63604707	0	0	Unchained	Unchained	Simple	HET	UNK
VCaP	chr5	62824557	62824559	chr5	124378284	124378286	CALL_1046	60228318	117760167	1	0	2	Unchained	Complex	HET	DISTAL
VCaP	chr14	61001328	61001335	chr4	187480096	187480103	CALL_1216	60426191	187412810	1	0	Unchained	Unchained	Simple	HET	UNK
VCaP	chr15	60634173	60634176	chr22	46355854	46355857	CALL_1118	60518663	46284772	0	1	10	Unchained	Complex	HET	UNK
VCaP	chr2	64707153	64707157	chr3	5721333	5721337	CALL_938	61108077	10596	0	0	11	Unchained	Complex	HET	UNK
VCaP	chr2	69760369	69760373	chr3	5721350	5721354	CALL_1156	61108077	10596	0	0	11	Unchained	Complex	HET	UNK
VCaP	chr4	63172107	63172108	chr6	34702911	34702912	CALL_808	62280227	31206485	1	0	7	Unchained	Complex	HET	UNK
VCaP	chr11	62834728	62834739	chr11	63072300	63072311	CALL_1028	62392384	62392384	1	1	Unchained	Unchained	Simple	HET	INV
VCaP	chr5	63684172	63684186	chr5	113503518	113503532	CALL_1224	63604707	112084075	0	0	2	Unchained	Complex	HET	UNK
VCaP	chr5	64440596	64440617	chr5	126187526	126187545	CALL_1022	63604707	117760167	0	0	2	Unchained	Complex	HET	UNK
VCaP	chr5	64613756	64613770	chr5	155496728	155496742	CALL_1056	63604707	148514366	0	1	2	Unchained	Complex	HET	UNK
VCaP	chr1	72766324	72766337	chr1	72811835	72811836	CALL_708	64385799	64385799	1	1	Unchained	Unchained	Simple	HET	DEL
VCaP	chr19	2904988	2905004	chr19	11469154	11469155	CALL_1220	66237	10569342	0	1	Unchained	Unchained	Simple	HET	UNK
VCaP	chr13	67282683	67282698	chr13	67681039	67681054	CALL_1016	66289364	66289364	.	.	12	Unchained	Complex	HOM	DUP
VCaP	chr13	68063940	68063956	chr13	70013106	70013122	CALL_1153	66289364	69920714	0	1	12	Unchained	Complex	HET	UNK
VCaP	chr16	67145181	67145185	chr21	42853720	42853724	CALL_1089	67047591	27478328	0	1	5	1	Complex	HET	UNK
VCaP	chr16	67707847	67707851	chr21	39876408	39876409	CALL_1120	67674086	27478328	0	1	5	1	Complex	HET	UNK
VCaP	chr11	68043094	68043095	chr6	27632471	27632476	CALL_987	67856179	24242808	1	0	Unchained	Unchained	Simple	HET	UNK
VCaP	chr17	73788383	73788387	chr21	40547306	40547310	CALL_1066	67994445	27478328	1	1	5	Unchained	Complex	HET	UNK
VCaP	chr11	68307649	68307662	chr11	69485627	69485640	CALL_1171	68058732	68722472	1	0	Unchained	Unchained	Simple	HET	UNK
VCaP	chr5	69324050	69324052	chr5	173621954	173621956	CALL_1072	69190283	170433872	0	0	2	Unchained	Complex	HET	DISTAL
VCaP	chr2	70473556	70473560	chr3	122549642	122549646	CALL_1178	69806654	119223529	1	0	Unchained	Unchained	Simple	HET	UNK
VCaP	chr5	73761660	73761674	chr5	98320780	98320794	CALL_1181	71887680	96968295	1	1	Unchained	Unchained	Simple	HET	UNK
VCaP	chr11	72736024	72736039	chr11	81258975	81258990	CALL_1130	72165753	78214760	0	0	Unchained	Unchained	Simple	HET	UNK
VCaP	chr4	73027521	73027536	chr4	73091830	73091832	CALL_1090	72967179	73029514	0	0	Unchained	Unchained	Simple	HET	INV
VCaP	chr5	74476899	74476907	chr5	101116192	101116205	CALL_1182	74406157	99532062	0	1	2	Unchained	Complex	HET	UNK
VCaP	chr5	76139353	76139363	chr5	179985009	179985022	CALL_1057	74962470	179790034	1	1	2	Unchained	Complex	HET	UNK
VCaP	chr5	76538198	76538207	chr5	180129867	180129882	CALL_993	74962470	179947342	1	0	2	Unchained	Complex	HET	UNK
VCaP	chr5	78311387	78311400	chr5	172061397	172061398	CALL_978	74962470	170433872	1	0	2	Unchained	Complex	HET	UNK
VCaP	chr13	78284027	78284042	chr13	86644303	86644318	CALL_1199	78099447	85844883	1	0	Unchained	Unchained	Simple	HET	UNK
VCaP	chr9	1109966	1109982	chr9	2834011	2834027	CALL_882	813948	2552730	0	0	Unchained	Unchained	Simple	HET	UNK
VCaP	chr16	84746346	84746360	chr16	85026162	85026176	CALL_1004	84059200	84975761	.	.	Unchained	Unchained	Simple	HOM	INV
VCaP	chr14	86457724	86457727	chr14	86489583	86489585	CALL_849	85524878	85524878	0	0	Unchained	Unchained	Simple	HET	DEL
VCaP	chr5	87888003	87888017	chr5	144310094	144310108	CALL_1162	87256740	143446661	0	1	2	Unchained	Complex	HET	UNK
VCaP	chr5	90245199	90245201	chr5	158523355	158523357	CALL_1225	87256740	148514366	0	1	2	Unchained	Complex	HET	DISTAL
VCaP	chr5	90245334	90245336	chr5	102694682	102694684	CALL_1183	87256740	99532062	0	1	2	Unchained	Complex	HET	DISTAL
VCaP	chr8	93520157	93520173	chr8	94753815	94753831	CALL_935	88884555	93855864	1	1	Unchained	Unchained	Simple	HET	UNK
VCaP	chr12	91621303	91621320	chr12	105303933	105303950	CALL_910	89446808	99570851	0	0	Unchained	Unchained	Simple	HET	UNK
VCaP	chr5	90815147	90815160	chr5	92186265	92186274	CALL_1073	90578584	91766851	1	1	Unchained	Unchained	Simple	HET	UNK
VCaP	chr4	94307944	94307948	chr7	47918722	47918726	CALL_1124	94145625	39438467	.	.	Unchained	Unchained	Simple	HET	UNK
VCaP	chr5	94764629	94764636	chr5	151502428	151502442	CALL_1093	94564485	148514366	0	1	2	Unchained	Complex	HET	UNK
VCaP	chr12	94686619	94686622	chr8	25855770	25855771	CALL_1039	94640643	25713835	0	0	Unchained	Unchained	Simple	HET	UNK
VCaP	chr5	96666475	96666490	chr5	143911494	143911509	CALL_1226	95870446	143446661	1	1	2	Unchained	Complex	HET	UNK
VCaP	chr13	96607340	96607344	chr17	4525433	4525437	CALL_1050	96446132	353830	1	1	9	Unchained	Complex	HET	UNK
VCaP	chr13	96924290	96924295	chr17	39871183	39871188	CALL_1065	96446132	39754726	1	0	9	2	Complex	HET	UNK
VCaP	chr13	97212418	97212421	chr17	37071173	37071177	CALL_767	97148127	36982083	1	0	9	Unchained	Complex	HET	UNK
VCaP	chr5	99660309	99660311	chr5	126816349	126816351	CALL_1082	99532062	126481364	1	1	2	Unchained	Complex	HET	DISTAL
VCaP	chr5	107176397	107176399	chr5	152665930	152665943	CALL_1074	99532062	148514366	1	1	2	3	Complex	HET	UNK
VCaP	chr5	107180599	107180614	chr5	180479074	180479089	CALL_915	99532062	179947342	1	0	2	3	Complex	HET	UNK
VCaP	chr5	109995245	109995261	chr5	158059743	158059759	CALL_1125	99532062	148514366	1	1	2	Unchained	Complex	HET	UNK
VCaP-CR	chr4	102444419	102444434	chr4	102490700	102490718	CALL_361	102405845	102499843	.	.	Unchained	Unchained	Simple	HOM	DEL
VCaP-CR	chr11	12539688	12539703	chr11	17011800	17011815	CALL_784	10344498	14977462	0	0	1	Unchained	Complex	HET	UNK
VCaP-CR	chr11	12872012	12872029	chr11	17216652	17216661	CALL_759	10344498	14977462	0	0	1	Unchained	Complex	HET	UNK
VCaP-CR	chr12	12688235	12688238	chr12	12883667	12883669	CALL_521	10442653	10442653	0	0	Unchained	Unchained	Simple	HET	DEL
VCaP-CR	chr9	1109973	1109983	chr9	2834010	2834026	CALL_476	10571	2766087	1	0	Unchained	Unchained	Simple	HET	UNK
VCaP-CR	chr6	11480121	11480138	chr6	19835858	19835871	CALL_194	10851764	19782355	1	1	2	Unchained	Complex	HET	UNK
VCaP-CR	chr3	114268791	114268809	chr3	115903033	115903051	CALL_701	112286302	112286302	1	1	2	Unchained	Complex	HET	UNK
VCaP-CR	chr3	117040435	117040452	chr3	117623792	117623809	CALL_744	112286302	112286302	.	.	2	Unchained	Complex	HOM	UNK
VCaP-CR	chr12	114991632	114991647	chr12	116103149	116103166	CALL_692	113116117	115983227	0	0	Unchained	Unchained	Simple	HET	UNK
VCaP-CR	chr5	136397941	136397958	chr5	179305313	179305325	CALL_578	117843857	174237060	0	0	Unchained	Unchained	Simple	HET	UNK
VCaP-CR	chr8	120743783	120743799	chr8	137181346	137181353	CALL_568	120499927	135756754	1	1	3	Unchained	Complex	HET	UNK
VCaP-CR	chr8	121923955	121923974	chr8	139628623	139628642	CALL_690	121873955	135756754	0	1	3	Unchained	Complex	HET	UNK
VCaP-CR	chr8	121993069	121993088	chr8	137849427	137849428	CALL_669	121873955	135756754	0	1	3	Unchained	Complex	HET	UNK
VCaP-CR	chr8	122489401	122489418	chr8	138007066	138007083	CALL_715	121943676	135756754	1	1	3	Unchained	Complex	HET	UNK
VCaP-CR	chr8	122920715	122920731	chr8	137397842	137397858	CALL_697	121943676	135756754	1	1	3	Unchained	Complex	HET	UNK
VCaP-CR	chr8	127980477	127980496	chr8	128205040	128205059	CALL_351	121943676	121943676	.	.	3	Unchained	Complex	HOM	DUP
VCaP-CR	chr12	123456043	123456045	chr16	84746050	84746052	CALL_751	122817149	84483563	0	0	4	3	Complex	HET	DISTAL
VCaP-CR	chr12	123456559	123456565	chr21	40547371	40547374	CALL_607	122817149	20602496	0	1	4	3	Complex	HET	UNK
VCaP-CR	chr12	123456572	123456577	chr16	85020273	85020278	CALL_797	122817149	84995670	0	0	4	3	Complex	HET	UNK
VCaP-CR	chr3	129763385	129763400	chr3	129806723	129806737	CALL_522	127867141	127867141	1	1	Unchained	Unchained	Simple	HET	DEL
VCaP-CR	chr3	131865017	131865020	chr3	132076667	132076670	CALL_518	129983747	129983747	.	.	Unchained	Unchained	Simple	HOM	DUP
VCaP-CR	chr6	135425236	135425239	chr6	135846265	135846268	CALL_590	135389376	135802896	1	1	Unchained	Unchained	Simple	HET	DEL
VCaP-CR	chr5	152665942	152665944	chr5	180479384	180479386	CALL_510	142280126	179651278	0	1	5	2	Complex	HET	DISTAL
VCaP-CR	chr11	35800055	35800070	chr11	36107468	36107483	CALL_712	14977462	14977462	.	.	1	Unchained	Complex	HOM	DUP
VCaP-CR	chr1	152555542	152555559	chr1	152587736	152587764	CALL_220	150405271	150405271	.	.	Unchained	Unchained	Simple	HOM	DEL
VCaP-CR	chr5	161033972	161033982	chr5	173376268	173376284	CALL_588	156070313	172556581	1	1	Unchained	Unchained	Simple	HET	UNK
VCaP-CR	chr11	1915255	1915272	chr11	1961035	1961064	CALL_459	15651	15651	1	1	Unchained	Unchained	Simple	HET	INV
VCaP-CR	chr4	161717112	161717129	chr4	163127216	163127233	CALL_745	161037749	161037749	0	0	Unchained	Unchained	Simple	HET	UNK
VCaP-CR	chr12	17880055	17880057	chr12	18011976	18011978	CALL_785	16394083	16394083	.	.	6	Unchained	Complex	HOM	DUP
VCaP-CR	chr12	17923242	17923244	chr12	18013153	18013155	CALL_344	16394083	16394083	.	.	6	Unchained	Complex	HET	INV
VCaP-CR	chr12	19742533	19742534	chr8	25900349	25900352	CALL_771	16394083	25852114	1	0	6	Unchained	Complex	HET	UNK
VCaP-CR	chr5	172602961	172602963	chr5	175933072	175933074	CALL_695	172556581	174237060	0	1	8	Unchained	Complex	HET	DISTAL
VCaP-CR	chr4	176432828	176432844	chr4	179198257	179198276	CALL_778	173545246	179117845	0	0	Unchained	Unchained	Simple	HET	UNK
VCaP-CR	chr5	175261812	175261827	chr5	175933058	175933073	CALL_805	174237060	174237060	1	1	8	Unchained	Complex	HET	UNK
VCaP-CR	chr20	1561073	1561090	chr20	1594184	1594208	CALL_236	18749	18749	.	.	Unchained	Unchained	Simple	HOM	DEL
VCaP-CR	chr4	190560075	190560092	chr4	190604205	190604222	CALL_675	190208704	190208704	1	1	Unchained	Unchained	Simple	HET	DEL
VCaP-CR	chr6	20177567	20177572	chr9	109345780	109345785	CALL_544	19782355	108968958	1	0	2	Unchained	Complex	HET	UNK
VCaP-CR	chr6	20264000	20264019	chr6	20497359	20497378	CALL_677	19782355	19782355	1	1	2	Unchained	Complex	HET	INV
VCaP-CR	chr6	21146974	21146994	chr6	21432302	21432322	CALL_780	19782355	19782355	1	1	2	Unchained	Complex	HET	DEL
VCaP-CR	chr6	23659950	23659969	chr6	52644423	52644442	CALL_725	19782355	41817394	1	0	2	Unchained	Complex	HET	UNK
VCaP-CR	chr12	20459632	20459645	chr12	106664460	106664473	CALL_557	20201704	106461871	1	0	Unchained	Unchained	Simple	HET	UNK
VCaP-CR	chr2	205743564	205743565	chr3	122143540	122143545	CALL_801	204913221	112286302	0	0	7	Unchained	Complex	HET	UNK
VCaP-CR	chr21	39876353	39876369	chr21	42858013	42858029	CALL_674	20602496	20602496	1	1	4	4	Complex	HET	UNK
VCaP-CR	chr14	28321851	28321866	chr14	28376620	28376635	CALL_638	21687130	28373388	0	1	Unchained	Unchained	Simple	HET	DEL
VCaP-CR	chr7	39282355	39282361	chr9	114919477	114919478	CALL_688	23849078	108968958	1	0	2	Unchained	Complex	HET	UNK
VCaP-CR	chr19	36292828	36292835	chr6	138447932	138447939	CALL_787	27682124	137103195	0	1	Unchained	Unchained	Simple	HET	UNK
VCaP-CR	chr6	32469517	32469518	chr6	32507632	32507642	CALL_765	31209043	31209043	0	0	9	Unchained	Complex	HET	UNK
VCaP-CR	chr6	33212528	33212545	chr6	33626493	33626510	CALL_553	31209043	31209043	0	0	9	Unchained	Complex	HET	UNK
VCaP-CR	chr2	34695830	34695849	chr2	34736549	34736568	CALL_559	32377576	32377576	0	0	Unchained	Unchained	Simple	HET	DEL
VCaP-CR	chr8	35592943	35592961	chr8	41627107	41627125	CALL_622	35469698	41284164	0	1	10	Unchained	Complex	HET	UNK
VCaP-CR	chr8	38155812	38155829	chr8	38187844	38187845	CALL_300	35843357	35843357	0	0	Unchained	Unchained	Simple	HET	INV
VCaP-CR	chr14	37370632	37370635	chr14	37417489	37417505	CALL_513	36242185	36242185	1	1	Unchained	Unchained	Simple	HET	DEL
VCaP-CR	chr14	41609270	41609289	chr14	41669638	41669659	CALL_652	36242185	36242185	0	0	Unchained	Unchained	Simple	HET	DEL
VCaP-CR	chr17	36641989	36641994	chr6	6265672	6265746	CALL_686	36366135	5964827	0	0	Unchained	Unchained	Simple	HET	UNK
VCaP-CR	chr17	37430801	37430804	chr17	39875083	39875086	CALL_687	36962173	36962173	1	1	11	1	Complex	HET	UNK
VCaP-CR	chr17	37448150	37448159	chr17	37532697	37532708	CALL_460	36962173	36962173	1	1	11	1	Complex	HET	INV
VCaP-CR	chr17	37475268	37475270	chr17	37532726	37532728	CALL_489	36962173	36962173	1	1	11	1	Complex	HET	DEL
VCaP-CR	chr3	43693902	43693915	chr3	57840669	57840675	CALL_776	37410799	55674975	0	1	Unchained	Unchained	Simple	HET	UNK
VCaP-CR	chr8	41649868	41649870	chr8	43003416	43003418	CALL_709	41284164	41284164	1	1	10	Unchained	Complex	HET	DISTAL
VCaP-CR	chr11	46131352	46131357	chr17	8263563	8263569	CALL_699	42958785	7991962	0	0	Unchained	Unchained	Simple	HET	UNK
VCaP-CR	chr22	45741521	45741523	chr22	46304801	46304803	CALL_644	45381999	46244019	1	0	13	Unchained	Complex	HET	DISTAL
VCaP-CR	chr17	47646822	47646824	chr9	112089991	112089993	CALL_773	46190927	108968958	1	0	2	Unchained	Complex	HET	DISTAL
VCaP-CR	chr11	46897636	46897641	chr17	37475365	37475370	CALL_749	46849346	36962173	0	1	11	1	Complex	HET	UNK
VCaP-CR	chr11	46897652	46897654	chr17	37448339	37448341	CALL_596	46849346	36962173	0	1	11	1	Complex	HET	DISTAL
VCaP-CR	chr11	47180108	47180110	chr13	96923343	96923345	CALL_682	46849346	96535721	0	0	11	1	Complex	HET	DISTAL
VCaP-CR	chr11	47181131	47181136	chr17	39865106	39865111	CALL_670	46849346	36962173	0	1	11	1	Complex	HET	UNK
VCaP-CR	chr11	47885876	47885878	chr17	37430706	37430708	CALL_705	47575849	36962173	0	1	11	1	Complex	HET	DISTAL
VCaP-CR	chr11	47909489	47909494	chr17	36833417	36833418	CALL_770	47575849	36366135	0	0	11	Unchained	Complex	HET	UNK
VCaP-CR	chr10	49336253	49336279	chr10	49557434	49557460	CALL_704	49146518	49146518	.	.	Unchained	Unchained	Simple	HOM	DUP
VCaP-CR	chr14	61001319	61001324	chr4	187480098	187480103	CALL_700	50192166	187470855	0	0	Unchained	Unchained	Simple	HET	UNK
VCaP-CR	chr19	52369964	52369983	chr19	52578833	52578852	CALL_609	50637348	50637348	.	.	Unchained	Unchained	Simple	HOM	DUP
VCaP-CR	chr7	54288533	54288556	chr7	54389040	54389062	CALL_492	52008281	52008281	.	.	Unchained	Unchained	Simple	HET	INV
VCaP-CR	chr11	57735558	57735563	chr6	20007719	20007724	CALL_796	57656041	19782355	0	1	2	Unchained	Complex	HET	UNK
VCaP-CR	chr5	58467203	58467220	chr5	173409358	173409365	CALL_676	58383836	172556581	1	0	8	Unchained	Complex	HET	UNK
VCaP-CR	chr15	60634170	60634175	chr22	46355856	46355860	CALL_752	59943887	46244019	.	.	13	Unchained	Complex	HET	UNK
VCaP-CR	chr5	60356775	60356795	chr5	66071436	66071454	CALL_577	60242455	60242455	1	1	5	Unchained	Complex	HET	UNK
VCaP-CR	chr5	62825359	62825361	chr5	124378862	124378864	CALL_426	60242455	117843857	0	0	5	Unchained	Complex	HET	DISTAL
VCaP-CR	chr5	66944394	66944396	chr5	143463581	143463583	CALL_804	60242455	142280126	1	0	5	Unchained	Complex	HET	DISTAL
VCaP-CR	chr5	67356158	67356175	chr5	138338243	138338259	CALL_640	60242455	137855165	1	0	5	Unchained	Complex	HET	UNK
VCaP-CR	chr2	64707152	64707153	chr3	5721338	5721339	CALL_597	61205145	10596	1	0	7	6	Complex	HET	UNK
VCaP-CR	chr2	64707160	64707165	chr3	122549848	122549853	CALL_742	61205145	112286302	1	0	7	6	Complex	HET	UNK
VCaP-CR	chr2	69760367	69760368	chr3	5721390	5721395	CALL_799	61205145	10596	1	0	7	6	Complex	HET	UNK
VCaP-CR	chr2	70473555	70473556	chr3	122549641	122549646	CALL_656	61205145	112286302	1	0	7	6	Complex	HET	UNK
VCaP-CR	chr13	68063580	68063582	chr13	74620815	74620817	CALL_684	62311195	74459264	1	1	12	5	Complex	HET	DISTAL
VCaP-CR	chr13	68063940	68063959	chr13	70013103	70013122	CALL_592	62311195	69908231	1	1	12	5	Complex	HET	UNK
VCaP-CR	chr11	62834704	62834705	chr11	63072306	63072307	CALL_613	62332175	62332175	1	1	Unchained	Unchained	Simple	HET	INV
VCaP-CR	chr4	63172107	63172111	chr6	34702917	34702918	CALL_401	62970657	31209043	0	0	8	Unchained	Complex	HET	UNK
VCaP-CR	chr4	64670116	64670133	chr4	69035042	69035055	CALL_727	63649083	68354637	.	.	Unchained	Unchained	Simple	HET	UNK
VCaP-CR	chr17	73788382	73788387	chr21	40547304	40547309	CALL_517	65673921	20602496	1	1	4	3	Complex	HET	UNK
VCaP-CR	chr1	72766324	72766325	chr1	72811838	72811839	CALL_324	66475600	66475600	1	1	Unchained	Unchained	Simple	HET	DEL
VCaP-CR	chr16	67145180	67145181	chr21	42853724	42853730	CALL_627	66983491	20602496	0	1	4	4	Complex	HET	UNK
VCaP-CR	chr11	68043090	68043091	chr6	27632471	27632472	CALL_343	67255953	19782355	1	1	2	Unchained	Complex	HET	UNK
VCaP-CR	chr16	67707844	67707849	chr21	39876411	39876412	CALL_620	67651726	20602496	0	1	4	4	Complex	HET	UNK
VCaP-CR	chr11	68043625	68043630	chr6	1404804	1404809	CALL_760	68025097	1279748	1	1	14	Unchained	Complex	HET	UNK
VCaP-CR	chr11	68307638	68307655	chr11	69485612	69485629	CALL_750	68025097	68691356	1	1	14	Unchained	Complex	HET	UNK
VCaP-CR	chr14	86457724	86457725	chr14	86489584	86489585	CALL_425	69621948	69621948	0	0	Unchained	Unchained	Simple	HET	DEL
VCaP-CR	chr13	70026878	70026897	chr13	74620796	74620813	CALL_662	69908231	74459264	1	1	12	5	Complex	HET	UNK
VCaP-CR	chr4	73027519	73027535	chr4	73091772	73091791	CALL_567	72698635	73070023	1	0	Unchained	Unchained	Simple	HET	INV
VCaP-CR	chr13	78282003	78282005	chr13	86612792	86612807	CALL_570	74459264	84402653	1	0	15	Unchained	Complex	HET	UNK
VCaP-CR	chr13	78284023	78284041	chr13	86644300	86644318	CALL_637	74459264	84402653	1	0	15	Unchained	Complex	HET	UNK
VCaP-CR	chr5	76139355	76139367	chr5	179985009	179985026	CALL_598	74735888	179651278	0	0	5	Unchained	Complex	HET	UNK
VCaP-CR	chr5	76538202	76538220	chr5	180129918	180129922	CALL_564	74735888	179651278	0	1	5	Unchained	Complex	HET	UNK
VCaP-CR	chr18	8467453	8467456	chr18	8824648	8824651	CALL_665	8234656	8785568	.	.	Unchained	Unchained	Simple	HOM	DUP
VCaP-CR	chr16	84746347	84746350	chr16	85026163	85026165	CALL_525	84727544	84995670	.	.	4	3	Complex	HOM	INV
VCaP-CR	chr13	95817720	95817725	chr17	40883146	40883147	CALL_673	86860581	40749216	0	0	Unchained	Unchained	Simple	HET	UNK
VCaP-CR	chr12	91621303	91621304	chr12	105303935	105303951	CALL_569	89000040	95901140	0	0	Unchained	Unchained	Simple	HET	UNK
VCaP-CR	chr9	94764606	94764623	chr9	95161317	95161334	CALL_756	92629362	94816802	0	1	Unchained	Unchained	Simple	HET	DEL
VCaP-CR	chr4	94307935	94307936	chr7	47918705	47918706	CALL_777	94195392	23849078	.	.	Unchained	Unchained	Simple	HET	UNK
VCaP-CR	chr12	94686616	94686622	chr8	25855770	25855774	CALL_660	94560711	25852114	0	0	6	Unchained	Complex	HET	UNK
VCaP-CR	chr5	96666474	96666481	chr5	143911499	143911508	CALL_729	95815821	142280126	1	0	5	Unchained	Complex	HET	UNK
VCaP-CR	chr13	96607338	96607343	chr17	4525434	4525439	CALL_470	96535721	353830	0	0	11	Unchained	Complex	HET	UNK
VCaP-CR	chr13	96924290	96924296	chr17	39871183	39871189	CALL_548	96535721	36962173	0	1	11	1	Complex	HET	UNK
VCaP-CR	chr5	107176383	107176399	chr5	152665927	152665943	CALL_583	96697947	142280126	1	0	5	2	Complex	HET	UNK
VCaP-CR	chr5	107180599	107180605	chr5	180479072	180479089	CALL_621	96697947	179651278	1	1	5	2	Complex	HET	UNK
VCaP-CR	chr5	113919938	113919955	chr5	159966390	159966407	CALL_593	96697947	156070313	1	1	5	Unchained	Complex	HET	UNK
VCaP-CR	chr13	97212417	97212422	chr17	37071176	37071177	CALL_389	97091562	36962173	1	1	11	Unchained	Complex	HET	UNK
VCaP-CR	chr2	99208941	99208962	chr2	233402871	233402976	CALL_726	97987281	232713739	0	0	Unchained	Unchained	Simple	HET	UNK
LAPC4	chr7	54301251	54301253	chr7	54389036	54389038	CALL_673	1	1	0	0	Unchained	Unchained	Simple	HET	INV
LAPC4	chr4	34779920	34779933	chr4	34828937	34828942	CALL_430	10540	10540	1	1	Unchained	Unchained	Simple	HET	DEL
LAPC4	chr1	120419864	120419875	chr1	120522818	120522833	CALL_614	108932135	108932135	0	0	Unchained	Unchained	Simple	HET	INV
LAPC4	chr9	17668093	17668096	chr9	17971706	17971711	CALL_640	10919	10919	.	.	Unchained	Unchained	Simple	HOM	DUP
LAPC4	chr20	1561070	1561110	chr20	1594150	1594164	CALL_422	11098	11098	0	0	1	Unchained	Complex	HET	DEL
LAPC4	chr20	12869845	12869847	chr9	113458397	113458399	CALL_897	11098	92629224	0	0	1	Unchained	Complex	HET	DISTAL
LAPC4	chr20	15129844	15129862	chr20	15318995	15318996	CALL_617	11098	15248310	1	0	Unchained	Unchained	Simple	HET	DEL
LAPC4	chr18	1084111	1084128	chr18	12403303	12403320	CALL_783	11319	11319	1	1	2	Unchained	Complex	HET	UNK
LAPC4	chr18	1755362	1755373	chr18	5310906	5310919	CALL_643	11319	11319	1	1	2	Unchained	Complex	HET	UNK
LAPC4	chr18	1814265	1814279	chr18	4051923	4051937	CALL_784	11319	11319	1	1	2	Unchained	Complex	HET	UNK
LAPC4	chr18	1951281	1951304	chr18	3784431	3784446	CALL_802	11319	11319	1	1	2	Unchained	Complex	HET	UNK
LAPC4	chr18	4755619	4755637	chr18	8421318	8421336	CALL_682	11319	11319	1	1	2	Unchained	Complex	HET	UNK
LAPC4	chr18	7768329	7768348	chr18	13899196	13899213	CALL_793	11319	11319	1	1	2	Unchained	Complex	HET	UNK
LAPC4	chr3	60353578	60353580	chr3	60403675	60403677	CALL_364	12225	12225	0	0	Unchained	Unchained	Simple	HET	DEL
LAPC4	chr3	65760215	65760218	chr3	65862713	65862716	CALL_767	12225	12225	1	1	3	Unchained	Complex	HET	DEL
LAPC4	chr7	141852710	141852713	chr7	141884035	141884041	CALL_708	130206105	130206105	0	0	Unchained	Unchained	Simple	HET	DEL
LAPC4	chr4	155371820	155371844	chr4	155467654	155467678	CALL_833	132684674	132684674	1	1	4	Unchained	Complex	HET	DUP
LAPC4	chr4	187362463	187362480	chr4	188754385	188754403	CALL_898	132684674	132684674	1	1	4	Unchained	Complex	HET	UNK
LAPC4	chr16	19261432	19261433	chr16	19520091	19520092	CALL_479	1327123	1327123	.	.	Unchained	Unchained	Simple	HOM	DUP
LAPC4	chr12	17923200	17923202	chr12	18013142	18013144	CALL_569	14623715	14623715	0	0	Unchained	Unchained	Simple	HET	INV
LAPC4	chr12	22709812	22709828	chr12	24249557	24249573	CALL_847	14623715	14623715	1	1	5	Unchained	Complex	HET	UNK
LAPC4	chr1	152555542	152555545	chr1	152587738	152587741	CALL_207	149776613	149776613	.	.	6	Unchained	Complex	HOM	DEL
LAPC4	chr1	153518439	153518440	chr1	153565998	153566001	CALL_770	149776613	149776613	0	0	6	Unchained	Complex	HET	DEL
LAPC4	chr1	154896666	154896683	chr1	155014384	155014401	CALL_771	149776613	149776613	0	0	6	Unchained	Complex	HET	DUP
LAPC4	chr11	1915270	1915271	chr11	1961043	1961060	CALL_609	176891	176891	0	0	Unchained	Unchained	Simple	HET	INV
LAPC4	chr2	184468200	184468203	chr2	184589301	184589304	CALL_813	183466999	183466999	1	1	7	Unchained	Complex	HET	DUP
LAPC4	chr2	187177959	187177972	chr2	187572564	187572577	CALL_826	183466999	183466999	.	.	7	Unchained	Complex	HOM	DUP
LAPC4	chr2	193792165	193792167	chr2	194079641	194079643	CALL_839	183466999	183466999	1	1	7	Unchained	Complex	HET	DEL
LAPC4	chr2	193792400	193792418	chr2	194205577	194205595	CALL_761	183466999	183466999	.	.	7	Unchained	Complex	HOM	DUP
LAPC4	chr18	27119009	27119028	chr18	27232236	27232255	CALL_876	18461823	18461823	1	1	Unchained	Unchained	Simple	HET	INV
LAPC4	chr14	37934087	37934103	chr14	38143614	38143630	CALL_739	20067925	20067925	.	.	8	Unchained	Complex	HOM	DUP
LAPC4	chr14	38172059	38172075	chr14	38213314	38213329	CALL_740	20067925	20067925	0	0	8	Unchained	Complex	HET	DEL
LAPC4	chr14	41609303	41609313	chr14	41669650	41669662	CALL_623	20067925	20067925	0	0	8	Unchained	Complex	HET	DEL
LAPC4	chr14	53240278	53240292	chr14	53488905	53488939	CALL_857	20067925	20067925	1	1	8	Unchained	Complex	HET	INV
LAPC4	chr14	80377774	80377777	chr14	80547848	80547851	CALL_666	20067925	20067925	0	0	8	Unchained	Complex	HET	DUP
LAPC4	chr1	215548996	215549028	chr1	215726621	215726653	CALL_763	206639944	206639944	.	.	Unchained	Unchained	Simple	HOM	DUP
LAPC4	chr1	249221224	249221248	chr6	144584983	144585060	CALL_825	249008641	117189507	0	1	Unchained	Unchained	Simple	HET	UNK
LAPC4	chr20	60872341	60872358	chr20	61439987	61440004	CALL_814	29754073	29754073	.	.	Unchained	Unchained	Simple	HOM	UNK
LAPC4	chr1	67129905	67129918	chr1	67226887	67226901	CALL_778	29978236	29978236	1	1	Unchained	Unchained	Simple	HET	DUP
LAPC4	chr17	34436085	34436087	chr17	34513810	34513812	CALL_759	30328150	34474356	.	.	Unchained	Unchained	Simple	HOM	DUP
LAPC4	chr6	32472957	32472958	chr6	32511577	32511578	CALL_687	32464825	32464825	0	0	9	Unchained	Complex	HET	UNK
LAPC4	chr6	42273515	42273532	chr6	42365908	42365918	CALL_852	32464825	32464825	0	0	9	Unchained	Complex	HET	DEL
LAPC4	chr16	34396102	34396112	chr16	34464550	34464560	CALL_710	34124017	34124017	1	1	Unchained	Unchained	Simple	HET	INV
LAPC4	chr5	35487999	35488014	chr5	35551662	35551679	CALL_851	34194374	34194374	1	1	Unchained	Unchained	Simple	HET	DEL
LAPC4	chr11	41303257	41303274	chr11	41688064	41688081	CALL_755	36338545	36338545	.	.	Unchained	Unchained	Simple	HOM	DUP
LAPC4	chr19	48969901	48969904	chr19	49093484	49093499	CALL_795	37784146	37784146	.	.	Unchained	Unchained	Simple	HOM	DUP
LAPC4	chr15	66148919	66148922	chr15	66236258	66236261	CALL_773	43997737	66183430	0	1	Unchained	Unchained	Simple	HET	DEL
LAPC4	chr2	50786882	50786885	chr2	50868663	50868666	CALL_644	5068816	5068816	0	0	Unchained	Unchained	Simple	HET	DUP
LAPC4	chr2	85629473	85629481	chr2	85673169	85673182	CALL_683	5068816	5068816	1	1	Unchained	Unchained	Simple	HET	DEL
LAPC4	chr10	82216681	82216702	chr10	82797147	82797168	CALL_736	51419737	51419737	1	1	Unchained	Unchained	Simple	HET	UNK
LAPC4	chr10	108791788	108791793	chr3	2282815	2282816	CALL_690	51419737	12225	0	1	3	Unchained	Complex	HET	UNK
LAPC4	chr4	69373780	69373790	chr4	69491090	69491100	CALL_552	52610766	52610766	0	0	10	Unchained	Complex	HET	DEL
LAPC4	chr4	91771182	91771185	chr4	91970885	91970888	CALL_618	52610766	52610766	0	0	10	Unchained	Complex	HET	DEL
LAPC4	chr12	100337092	100337108	chr12	100405016	100405025	CALL_748	53699802	53699802	0	0	11	Unchained	Complex	HET	DEL
LAPC4	chr12	111609061	111609063	chr12	111887987	111887989	CALL_801	53699802	53699802	.	.	11	Unchained	Complex	HOM	DUP
LAPC4	chr11	60117497	60117520	chr11	60252065	60252092	CALL_385	54645473	54645473	1	1	12	Unchained	Complex	HET	UNK
LAPC4	chr11	60123085	60123087	chr17	12606725	12606727	CALL_882	54645473	399930	1	0	12	Unchained	Complex	HET	DISTAL
LAPC4	chr6	2390751	2390754	chr6	2572952	2572955	CALL_672	61923	61923	.	.	Unchained	Unchained	Simple	HOM	DUP
LAPC4	chr6	67008731	67008732	chr6	67048915	67048916	CALL_415	62152087	62152087	0	0	Unchained	Unchained	Simple	HET	DEL
LAPC4	chr6	78967196	78967206	chr6	79036466	79036475	CALL_807	62152087	62152087	1	1	Unchained	Unchained	Simple	HET	DEL
LAPC4	chr12	9042981	9042997	chr12	19949895	19949911	CALL_765	70060	14623715	1	1	5	Unchained	Complex	HET	UNK
LAPC4	chr5	97047781	97047874	chr5	97096148	97096159	CALL_661	70399247	70399247	1	1	13	Unchained	Complex	HET	DEL
LAPC4	chr5	159693229	159693230	chr5	159772822	159772832	CALL_834	70399247	70399247	1	1	13	Unchained	Complex	HET	DEL
LAPC4	chr19	13046032	13046047	chr19	13117736	13117737	CALL_760	7367135	7367135	0	0	Unchained	Unchained	Simple	HET	DUP
LAPC4	chr8	127961701	127961712	chr8	128117296	128117306	CALL_284	86832212	86832212	.	.	14	Unchained	Complex	HOM	DUP
LAPC4	chr8	129774244	129774259	chr8	129815594	129815605	CALL_709	86832212	86832212	1	1	14	Unchained	Complex	HET	DEL
LAPC4	chr8	130584114	130584115	chr8	130924918	130924928	CALL_700	86832212	86832212	.	.	14	Unchained	Complex	HOM	DUP
LAPC4	chr5	9216762	9216784	chr5	9405311	9405340	CALL_671	884754	884754	.	.	15	Unchained	Complex	HOM	DUP
LAPC4	chr5	11241003	11241019	chr5	22783466	22783482	CALL_850	884754	21509036	0	0	15	Unchained	Complex	HET	UNK
LAPC4	chr3	116429248	116429263	chr3	116469656	116469666	CALL_493	93455756	93455756	1	1	16	Unchained	Complex	HET	DEL
LAPC4	chr3	116497234	116497250	chr3	116587437	116587452	CALL_571	93455756	93455756	1	1	16	Unchained	Complex	HET	DEL
LAPC4	chr3	127073384	127073399	chr3	127124499	127124516	CALL_655	93455756	93455756	1	1	16	Unchained	Complex	HET	DEL
LAPC4	chr3	129763382	129763398	chr3	129806744	129806746	CALL_462	93455756	93455756	1	1	16	Unchained	Complex	HET	DEL
LAPC4-CR	chr12	111609491	111609493	chr12	111887984	111887986	CALL_1080	100404037	100404037	.	.	Unchained	Unchained	Simple	HOM	DUP
LAPC4-CR	chr7	120059422	120059437	chr7	120114980	120114995	CALL_818	100621401	100621401	0	0	Unchained	Unchained	Simple	HET	DUP
LAPC4-CR	chr1	120419828	120419841	chr1	120522807	120522820	CALL_925	103865477	103865477	1	1	Unchained	Unchained	Simple	HET	INV
LAPC4-CR	chr13	105159989	105160007	chr13	105261189	105261207	CALL_926	105127932	105155480	.	.	Unchained	Unchained	Simple	HOM	DUP
LAPC4-CR	chr2	106509637	106509665	chr2	106583473	106583501	CALL_1127	106448262	106448262	1	1	Unchained	Unchained	Simple	HET	DUP
LAPC4-CR	chr8	127961711	127961714	chr8	128117289	128117290	CALL_558	106735349	106735349	.	.	1	Unchained	Complex	HOM	DUP
LAPC4-CR	chr8	128040803	128040843	chr8	128612757	128612797	CALL_1133	106735349	106735349	.	.	1	Unchained	Complex	HOM	UNK
LAPC4-CR	chr8	129774214	129774231	chr8	129815598	129815615	CALL_989	106735349	106735349	0	0	1	Unchained	Complex	HET	DEL
LAPC4-CR	chr8	130584127	130584128	chr8	130924918	130924931	CALL_1055	106735349	106735349	.	.	1	Unchained	Complex	HOM	DUP
LAPC4-CR	chr10	108791788	108791793	chr3	2282811	2282816	CALL_963	107926579	662913	0	1	Unchained	Unchained	Simple	HET	UNK
LAPC4-CR	chr18	1084112	1084128	chr18	12403347	12403354	CALL_1126	11083	11083	1	1	2	Unchained	Complex	HET	UNK
LAPC4-CR	chr18	1755358	1755375	chr18	5310905	5310922	CALL_965	11083	11083	1	1	2	Unchained	Complex	HET	UNK
LAPC4-CR	chr18	1814376	1814397	chr18	4051922	4051943	CALL_1148	11083	11083	1	1	2	Unchained	Complex	HET	UNK
LAPC4-CR	chr18	4755602	4755635	chr18	8421356	8421371	CALL_1096	11083	11083	1	1	2	Unchained	Complex	HET	UNK
LAPC4-CR	chr18	7768329	7768342	chr18	13899213	13899214	CALL_1140	11083	11083	1	1	2	Unchained	Complex	HET	UNK
LAPC4-CR	chr18	7919637	7919668	chr18	7982646	7982677	CALL_1029	11083	11083	0	0	Unchained	Unchained	Simple	HET	DUP
LAPC4-CR	chr12	11189746	11189761	chr12	11250502	11250515	CALL_1079	11092443	11092443	1	1	Unchained	Unchained	Simple	HET	DUP
LAPC4-CR	chr20	1561071	1561085	chr20	1594151	1594165	CALL_825	11098	11098	0	0	Unchained	Unchained	Simple	HET	DEL
LAPC4-CR	chr20	15129844	15129863	chr20	15318977	15318996	CALL_1062	11098	11098	1	1	Unchained	Unchained	Simple	HET	DEL
LAPC4-CR	chr2	117764537	117764557	chr2	117858972	117858992	CALL_1085	110988552	110988552	.	.	Unchained	Unchained	Simple	HOM	DUP
LAPC4-CR	chr3	127073454	127073465	chr3	127124516	127124519	CALL_1001	116535843	116535843	1	1	3	Unchained	Complex	HET	DEL
LAPC4-CR	chr3	129763117	129763131	chr3	129806732	129806746	CALL_1015	116535843	116535843	1	1	3	Unchained	Complex	HET	DEL
LAPC4-CR	chr11	126337033	126337035	chr11	126441783	126441785	CALL_1078	124236544	124236544	.	.	Unchained	Unchained	Simple	HOM	DUP
LAPC4-CR	chr4	155371823	155371844	chr4	155467654	155467675	CALL_987	132685258	132685258	.	.	4	Unchained	Complex	HOM	DUP
LAPC4-CR	chr4	187362204	187362206	chr4	188754456	188754458	CALL_1130	132685258	132685258	0	0	4	Unchained	Complex	HET	DISTAL
LAPC4-CR	chr7	141852710	141852726	chr7	141884032	141884044	CALL_1024	141372269	141372269	1	1	Unchained	Unchained	Simple	HET	DEL
LAPC4-CR	chr1	152555527	152555542	chr1	152587726	152587741	CALL_737	149482900	149482900	0	0	5	Unchained	Complex	HET	DEL
LAPC4-CR	chr1	153518501	153518504	chr1	153565998	153566003	CALL_1027	149482900	149482900	0	0	5	Unchained	Complex	HET	DEL
LAPC4-CR	chr1	154896666	154896682	chr1	155014384	155014400	CALL_1044	149482900	149482900	.	.	5	Unchained	Complex	HOM	DUP
LAPC4-CR	chr9	17668093	17668096	chr9	17971708	17971711	CALL_1019	15185557	15185557	.	.	Unchained	Unchained	Simple	HOM	DUP
LAPC4-CR	chr3	167120040	167120042	chr3	167237886	167237888	CALL_972	167069533	167069533	.	.	Unchained	Unchained	Simple	HOM	DUP
LAPC4-CR	chr3	175017033	175017055	chr3	176212956	176212978	CALL_1016	171952998	171952998	0	0	Unchained	Unchained	Simple	HET	UNK
LAPC4-CR	chr12	17923221	17923223	chr12	18014036	18014038	CALL_1012	17762600	17762600	.	.	Unchained	Unchained	Simple	HET	INV
LAPC4-CR	chr10	29377991	29378010	chr10	29486751	29486770	CALL_1049	18001575	18001575	.	.	Unchained	Unchained	Simple	HOM	UNK
LAPC4-CR	chr2	184468200	184468203	chr2	184589301	184589304	CALL_970	183426975	183426975	.	.	6	Unchained	Complex	HOM	DUP
LAPC4-CR	chr2	187177925	187177940	chr2	187572563	187572578	CALL_1030	183426975	183426975	.	.	6	Unchained	Complex	HOM	DUP
LAPC4-CR	chr7	10847001	10847003	chr7	10946951	10946953	CALL_1023	18381	18381	.	.	Unchained	Unchained	Simple	HOM	DUP
LAPC4-CR	chr16	19261421	19261434	chr16	19520089	19520096	CALL_889	18435258	18435258	.	.	Unchained	Unchained	Simple	HOM	DUP
LAPC4-CR	chr18	27119010	27119036	chr18	27232229	27232255	CALL_1122	18511872	18511872	0	0	Unchained	Unchained	Simple	HET	INV
LAPC4-CR	chr12	22702641	22702651	chr12	23173440	23173450	CALL_1144	18954169	18954169	1	1	7	Unchained	Complex	HET	UNK
LAPC4-CR	chr12	22709808	22709828	chr12	24249553	24249573	CALL_1136	18954169	24228211	1	1	7	Unchained	Complex	HET	UNK
LAPC4-CR	chr2	193792314	193792316	chr2	194079692	194079694	CALL_1106	193272423	193272423	1	1	8	Unchained	Complex	HET	DEL
LAPC4-CR	chr2	193792416	193792436	chr2	194205599	194205619	CALL_1037	193272423	193272423	.	.	8	Unchained	Complex	HOM	DUP
LAPC4-CR	chr11	26629274	26629291	chr11	26717385	26717402	CALL_1093	194520	194520	0	0	9	Unchained	Complex	HET	DUP
LAPC4-CR	chr11	41303257	41303273	chr11	41688064	41688080	CALL_1020	194520	194520	.	.	9	Unchained	Complex	HOM	DUP
LAPC4-CR	chr14	41609238	41609263	chr14	41669640	41669665	CALL_1125	19456742	19456742	1	1	Unchained	Unchained	Simple	HET	DEL
LAPC4-CR	chr14	53240306	53240319	chr14	53488910	53488923	CALL_1121	19456742	19456742	0	0	Unchained	Unchained	Simple	HET	INV
LAPC4-CR	chr1	217076161	217076166	chr3	59972477	59972482	CALL_1102	206617888	43349185	0	1	10	1	Complex	HET	UNK
LAPC4-CR	chr1	25893248	25893263	chr1	25964197	25964217	CALL_1115	24342985	24342985	0	0	Unchained	Unchained	Simple	HET	DUP
LAPC4-CR	chr20	46429054	46429056	chr20	46526693	46526695	CALL_1149	29754073	29754073	.	.	Unchained	Unchained	Simple	HOM	DUP
LAPC4-CR	chr1	47596025	47596027	chr1	47697945	47697947	CALL_1058	29978399	29978399	.	.	11	Unchained	Complex	HOM	DUP
LAPC4-CR	chr1	67129903	67129919	chr1	67226887	67226903	CALL_1004	29978399	29978399	.	.	11	Unchained	Complex	HOM	DUP
LAPC4-CR	chr1	70918143	70918157	chr1	70959718	70959732	CALL_1066	29978399	29978399	0	0	11	Unchained	Complex	HET	DUP
LAPC4-CR	chr7	54301231	54301233	chr7	54389019	54389021	CALL_1132	33768408	54354000	.	.	Unchained	Unchained	Simple	HET	INV
LAPC4-CR	chr16	34396027	34396041	chr16	34464649	34464660	CALL_906	34124481	34124481	0	0	Unchained	Unchained	Simple	HET	INV
LAPC4-CR	chr5	35487993	35487996	chr5	35551681	35551686	CALL_1046	34235241	34235241	1	1	Unchained	Unchained	Simple	HET	DEL
LAPC4-CR	chr6	42273521	42273534	chr6	42365903	42365945	CALL_1009	39129164	42351488	0	0	Unchained	Unchained	Simple	HET	DEL
LAPC4-CR	chr2	50786870	50786885	chr2	50868663	50868678	CALL_782	41019370	41019370	.	.	Unchained	Unchained	Simple	HOM	DUP
LAPC4-CR	chr3	59891792	59891809	chr3	60063362	60063379	CALL_1073	43349185	43349185	.	.	10	1	Complex	HOM	DUP
LAPC4-CR	chr3	59956076	59956091	chr3	60069479	60069494	CALL_966	43349185	43349185	.	.	10	1	Complex	HOM	DUP
LAPC4-CR	chr19	48969888	48969903	chr19	49093488	49093498	CALL_985	48423506	48423506	.	.	12	Unchained	Complex	HOM	DUP
LAPC4-CR	chr19	53211142	53211161	chr19	53271705	53271722	CALL_1105	48423506	48423506	1	1	12	Unchained	Complex	HET	DUP
LAPC4-CR	chr10	65086869	65086884	chr10	65274629	65274644	CALL_1119	51452715	65274539	1	0	Unchained	Unchained	Simple	HET	DEL
LAPC4-CR	chr4	55100882	55100903	chr4	55259633	55259649	CALL_986	52611399	52611399	.	.	Unchained	Unchained	Simple	HOM	DUP
LAPC4-CR	chr15	66148919	66148922	chr15	66236258	66236263	CALL_1138	54206482	54206482	0	0	Unchained	Unchained	Simple	HET	DEL
LAPC4-CR	chr5	9216769	9216786	chr5	9405334	9405351	CALL_961	5509152	5509152	.	.	13	Unchained	Complex	HOM	DUP
LAPC4-CR	chr5	11241005	11241019	chr5	22783468	22783482	CALL_1108	5509152	17599542	0	0	13	Unchained	Complex	HET	UNK
LAPC4-CR	chr11	60117497	60117522	chr11	60252069	60252094	CALL_624	58690479	58690479	.	.	14	Unchained	Complex	HOM	UNK
LAPC4-CR	chr11	60170061	60170063	chr17	12627605	12627607	CALL_1094	58690479	347844	0	1	14	Unchained	Complex	HET	DISTAL
LAPC4-CR	chr6	67008733	67008748	chr6	67048899	67048915	CALL_841	62153776	62153776	0	0	15	Unchained	Complex	HET	DEL
LAPC4-CR	chr6	74528670	74528677	chr6	74608910	74608921	CALL_1109	62153776	62153776	0	0	15	Unchained	Complex	HET	DUP
LAPC4-CR	chr6	78967194	78967208	chr6	79036462	79036476	CALL_1040	62153776	79018894	1	1	Unchained	Unchained	Simple	HET	DEL
LAPC4-CR	chr4	69373799	69373812	chr4	69491075	69491088	CALL_920	62751931	62751931	1	1	Unchained	Unchained	Simple	HET	DEL
LAPC4-CR	chr7	69971088	69971107	chr7	70254077	70254098	CALL_1142	62873612	62873612	.	.	Unchained	Unchained	Simple	HOM	DUP
LAPC4-CR	chr9	10873788	10873791	chr9	10923851	10923854	CALL_1111	6402338	6402338	0	0	Unchained	Unchained	Simple	HET	DUP
LAPC4-CR	chr12	100337106	100337109	chr12	100405025	100405030	CALL_1145	69569460	100389672	1	0	Unchained	Unchained	Simple	HET	DEL
LAPC4-CR	chr5	159693227	159693230	chr5	159772826	159772829	CALL_1053	70535042	70535042	1	1	16	Unchained	Complex	HET	DEL
LAPC4-CR	chr5	173928270	173928295	chr5	174112600	174112626	CALL_1039	70535042	70535042	.	.	16	Unchained	Complex	HET	INV
LAPC4-CR	chr19	13046044	13046047	chr19	13117741	13117742	CALL_957	7370149	7370149	0	0	Unchained	Unchained	Simple	HET	DUP
LAPC4-CR	chr2	85629468	85629471	chr2	85673179	85673182	CALL_942	85628273	85628273	1	1	Unchained	Unchained	Simple	HET	DEL
LAPC4-CR	chr4	91137718	91137738	chr4	91347437	91347457	CALL_913	89091681	89091681	.	.	17	Unchained	Complex	HOM	DUP
LAPC4-CR	chr4	91771182	91771196	chr4	91970886	91970900	CALL_960	89091681	91918534	1	0	17	Unchained	Complex	HET	DEL
LAPC4-CR	chr4	34779894	34779905	chr4	34828971	34828984	CALL_802	9273637	9273637	0	0	Unchained	Unchained	Simple	HET	DEL
LAPC4-CR	chr3	116429248	116429266	chr3	116469798	116469816	CALL_991	93455290	93455290	1	1	3	Unchained	Complex	HET	DEL
LAPC4-CR	chr3	116497217	116497229	chr3	116587458	116587473	CALL_1107	93455290	116535843	1	1	3	Unchained	Complex	HET	DEL
LAPC4-CR	chr6	2390818	2390831	chr6	2572915	2572928	CALL_909	95666	95666	.	.	Unchained	Unchained	Simple	HOM	DUP
PC3	chr1	152555547	152555557	chr1	152587737	152587754	CALL_1857	152066449	152066449	0	0	Unchained	Unchained	Simple	HET	DEL
PC3	chr1	169803976	169803979	chr10	89664088	89664093	CALL_1978	169530227	87861072	1	1	Unchained	Unchained	Simple	HET	UNK
PC3	chr1	170237485	170237486	chr1	189958832	189958848	CALL_1840	169530227	184368192	0	1	Unchained	Unchained	Simple	HET	UNK
PC3	chr1	170575243	170575244	chr10	77656272	77656273	CALL_1940	170280814	76957132	0	0	1	Unchained	Complex	HET	UNK
PC3	chr1	170808891	170808895	chr10	75203648	75203652	CALL_2140	170280814	75100161	0	0	1	Unchained	Complex	HET	UNK
PC3	chr1	170842137	170842140	chr10	78390691	78390694	CALL_2155	170280814	77791715	0	0	1	Unchained	Complex	HET	UNK
PC3	chr1	171404642	171404650	chr1	172353565	172353576	CALL_2015	171083706	171083706	0	0	2	Unchained	Complex	HET	UNK
PC3	chr1	171694606	171694607	chr10	80445276	80445279	CALL_2034	171083706	79957201	0	0	2	Unchained	Complex	HET	UNK
PC3	chr1	172117485	172117489	chr10	79707396	79707400	CALL_2083	171083706	79440355	0	0	2	Unchained	Complex	HET	UNK
PC3	chr1	172523966	172523967	chr10	80089434	80089435	CALL_2048	171083706	79957201	0	0	2	Unchained	Complex	HET	UNK
PC3	chr1	173821026	173821027	chr1	201448669	201448682	CALL_1638	171083706	199728897	0	1	2	Unchained	Complex	HET	UNK
PC3	chr1	190320508	190320524	chr1	205100788	205100805	CALL_2084	184368192	204361713	1	0	Unchained	Unchained	Simple	HET	UNK
PC3	chr1	190448546	190448562	chr1	202713503	202713519	CALL_1987	190412197	199728897	0	0	3	Unchained	Complex	HET	UNK
PC3	chr1	190610998	190610999	chr10	49697467	49697471	CALL_1951	190412197	49148903	0	1	3	Unchained	Complex	HET	UNK
PC3	chr1	190652185	190652201	chr1	191020903	191020919	CALL_2259	190412197	190412197	0	0	3	Unchained	Complex	HET	INV
PC3	chr1	199727000	199727004	chr10	81559089	81559093	CALL_1971	194076807	81346062	.	.	Unchained	Unchained	Simple	HET	UNK
PC3	chr1	200033836	200033851	chr1	200802015	200802030	CALL_2016	199728897	199728897	1	1	2	Unchained	Complex	HET	UNK
PC3	chr1	204308430	204308434	chr10	52558077	52558081	CALL_2076	204124604	51969013	0	1	4	Unchained	Complex	HET	UNK
PC3	chr1	206225483	206225496	chr1	207935963	207935972	CALL_1910	206025209	207016437	0	1	Unchained	Unchained	Simple	HET	UNK
PC3	chr1	212013298	212013303	chr10	66137888	66137893	CALL_2017	211369011	64972084	1	1	4	Unchained	Complex	HET	UNK
PC3	chr1	213261414	213261430	chr1	220251237	220251248	CALL_2035	211369011	215331562	1	1	4	Unchained	Complex	HET	UNK
PC3	chr1	214947004	214947006	chr10	62202622	62202627	CALL_1988	214707466	60882719	1	1	5	Unchained	Complex	HET	UNK
PC3	chr1	217782545	217782555	chr1	217949484	217949498	CALL_2001	215331562	215331562	1	1	4	Unchained	Complex	HET	DEL
PC3	chr1	222055963	222055964	chr10	77031251	77031255	CALL_2156	215331562	76957132	1	1	4	Unchained	Complex	HET	UNK
PC3	chr1	226283597	226283602	chr10	74776294	74776299	CALL_2049	225581524	74730695	1	0	6	Unchained	Complex	HET	UNK
PC3	chr1	230117601	230117629	chr1	247323463	247323473	CALL_1989	229981451	247032138	0	0	7	Unchained	Complex	HET	UNK
PC3	chr1	230978468	230978472	chr10	69397337	69397341	CALL_2123	229981451	69260803	0	0	7	Unchained	Complex	HET	UNK
PC3	chr1	234463140	234463143	chr10	62989311	62989314	CALL_1979	233071029	60882719	0	1	5	Unchained	Complex	HET	UNK
PC3	chr1	239098772	239098776	chr10	65512290	65512294	CALL_2124	236884387	64972084	1	0	Unchained	Unchained	Simple	HET	UNK
PC3	chr1	241084293	241084298	chr10	65352390	65352395	CALL_2201	239694692	64972084	0	1	4	Unchained	Complex	HET	UNK
PC3	chr1	243693758	243693762	chr10	53958224	53958225	CALL_2158	243302901	51969013	0	1	4	Unchained	Complex	HET	UNK
PC3	chr1	248107557	248107561	chr10	58029462	58029466	CALL_2101	247861704	55512417	0	1	8	Unchained	Complex	HET	UNK
PC3	chr1	50581001	50581004	chr1	51076724	51076727	CALL_2176	49515320	50577182	1	0	Unchained	Unchained	Simple	HET	DEL
PC3	chr1	72766281	72766294	chr1	72811827	72811840	CALL_2066	72438207	72438207	1	1	Unchained	Unchained	Simple	HET	DEL
PC3	chr10	18566598	18566605	chr3	116732072	116732079	CALL_2125	18032012	116187853	0	0	9	7	Complex	HET	UNK
PC3	chr10	18566604	18566609	chr3	120129454	120129459	CALL_2102	18032012	119881519	0	0	9	7	Complex	HET	UNK
PC3	chr10	33589123	33589139	chr10	38238597	38238610	CALL_2141	33449423	36410733	0	1	10	Unchained	Complex	HET	UNK
PC3	chr10	33591709	33591714	chr19	31881516	31881521	CALL_2260	33449423	31034144	0	0	10	Unchained	Complex	HET	UNK
PC3	chr10	45968655	45968659	chr12	25866801	25866804	CALL_2002	42606505	24625704	0	0	Unchained	Unchained	Simple	HET	UNK
PC3	chr10	53657097	53657114	chr10	65193708	65193725	CALL_1980	51969013	64972084	1	1	4	Unchained	Complex	HET	UNK
PC3	chr10	56790759	56790762	chr10	56871842	56871845	CALL_1945	55512417	55512417	1	1	8	Unchained	Complex	HET	DEL
PC3	chr10	58848254	58848267	chr10	60886736	60886749	CALL_2220	58597679	58597679	.	.	Unchained	Unchained	Simple	HET	UNK
PC3	chr10	300150	300170	chr10	1525454	1525474	CALL_2218	62813	1481245	1	0	Unchained	Unchained	Simple	HET	UNK
PC3	chr10	68476549	68476566	chr10	68759800	68759815	CALL_1961	68167154	68167154	.	.	Unchained	Unchained	Simple	HOM	DUP
PC3	chr10	71975399	71975412	chr10	74866023	74866036	CALL_2050	71253283	74730695	0	0	11	Unchained	Complex	HET	UNK
PC3	chr10	72831658	72831662	chr12	29620002	29620006	CALL_2163	71253283	26325871	0	0	11	Unchained	Complex	HET	UNK
PC3	chr10	74508421	74508433	chr10	75240053	75240069	CALL_1935	73944250	75100161	1	0	1	Unchained	Complex	HET	UNK
PC3	chr10	76202606	76202622	chr10	76881789	76881805	CALL_2222	76030077	76814214	0	0	Unchained	Unchained	Simple	HET	UNK
PC3	chr10	77973260	77973275	chr10	78586140	78586155	CALL_2263	77791715	78424047	.	.	Unchained	Unchained	Simple	HET	UNK
PC3	chr11	107401706	107401709	chr11	107839266	107839269	CALL_1918	106204592	106204592	.	.	Unchained	Unchained	Simple	HOM	DUP
PC3	chr11	1915268	1915273	chr11	1961050	1961063	CALL_2051	1289349	1289349	0	0	Unchained	Unchained	Simple	HET	INV
PC3	chr11	55365430	55365446	chr11	55445871	55445877	CALL_2104	54649546	54649546	0	0	Unchained	Unchained	Simple	HET	UNK
PC3	chr11	85651975	85651992	chr11	86603815	86603832	CALL_1917	84213672	86518503	1	0	Unchained	Unchained	Simple	HET	UNK
PC3	chr12	110144555	110144559	chr20	5949179	5949180	CALL_2265	105927581	3945945	0	0	Unchained	Unchained	Simple	HET	UNK
PC3	chr12	123389626	123389642	chr12	124122447	124122463	CALL_2126	122730475	123998810	1	0	Unchained	Unchained	Simple	HET	UNK
PC3	chr12	131206634	131206638	chr8	62321654	62321658	CALL_1990	129402806	61702142	0	0	Unchained	Unchained	Simple	HET	UNK
PC3	chr12	17923185	17923187	chr12	18013095	18013097	CALL_1897	16604940	16604940	1	1	Unchained	Unchained	Simple	HET	UNK
PC3	chr12	25412937	25412948	chr12	25451232	25451245	CALL_2223	24625704	24625704	1	1	Unchained	Unchained	Simple	HET	DEL
PC3	chr12	28115882	28115892	chr12	28803246	28803261	CALL_1706	26325871	26325871	0	0	11	Unchained	Complex	HET	UNK
PC3	chr12	29728359	29728374	chr12	30123622	30123635	CALL_2088	26325871	26325871	0	0	11	Unchained	Complex	HET	INV
PC3	chr12	51494231	51494244	chr12	51655768	51655781	CALL_2224	50876388	50876388	.	.	Unchained	Unchained	Simple	HET	DEL
PC3	chr13	57752540	57752543	chr13	57788861	57788864	CALL_1900	57747607	57747607	0	0	Unchained	Unchained	Simple	HET	DEL
PC3	chr14	41609311	41609325	chr14	41669655	41669668	CALL_2020	41416975	41416975	0	0	Unchained	Unchained	Simple	HET	DEL
PC3	chr14	68715734	68715750	chr14	68848299	68848315	CALL_1969	68673706	68831078	.	.	Unchained	Unchained	Simple	HOM	DUP
PC3	chr14	80098547	80098549	chr5	54279792	54279794	CALL_2266	79718167	52820649	1	0	Unchained	Unchained	Simple	HET	DISTAL
PC3	chr15	36334101	36334103	chr15	36676514	36676516	CALL_2127	36168062	36396056	.	.	12	Unchained	Complex	HOM	DUP
PC3	chr15	36734299	36734316	chr15	36766317	36766334	CALL_2229	36396056	36396056	1	1	12	Unchained	Complex	HET	UNK
PC3	chr15	45804173	45804174	chr17	41571517	41571520	CALL_2128	45431961	40592125	0	1	13	Unchained	Complex	HET	UNK
PC3	chr15	45824209	45824210	chr22	32699448	32699449	CALL_2144	45431961	32326470	1	0	Unchained	Unchained	Simple	HET	UNK
PC3	chr15	60144879	60144895	chr15	60817948	60817964	CALL_2109	59804917	59804917	0	0	Unchained	Unchained	Simple	HET	UNK
PC3	chr16	6772483	6772499	chr16	10484962	10484978	CALL_2206	2810793	10027155	1	0	14	Unchained	Complex	HET	UNK
PC3	chr16	6773951	6773968	chr16	8596525	8596542	CALL_2230	2810793	8210848	1	0	14	Unchained	Complex	HET	UNK
PC3	chr16	69963372	69963374	chr19	52833780	52833785	CALL_2231	68004106	51489982	0	1	Unchained	Unchained	Simple	HET	UNK
PC3	chr17	40255333	40255336	chr17	40670617	40670620	CALL_2038	39382913	40592125	0	1	13	Unchained	Complex	HET	DEL
PC3	chr17	45182298	45182317	chr17	45733853	45733861	CALL_2130	45057362	45057362	.	.	Unchained	Unchained	Simple	HOM	UNK
PC3	chr17	71889067	71889070	chr17	71945701	71945704	CALL_2146	71582344	71582344	1	1	Unchained	Unchained	Simple	HET	DUP
PC3	chr17	78587206	78587208	chr3	157804697	157804699	CALL_2182	78289826	156947360	0	1	15	8	Complex	HET	DISTAL
PC3	chr17	78587279	78587284	chr4	78220027	78220032	CALL_2147	78289826	75915882	0	1	15	8	Complex	HET	UNK
PC3	chr18	28681621	28681636	chr18	49534436	49534451	CALL_2080	28317066	48621425	1	1	Unchained	Unchained	Simple	HET	UNK
PC3	chr18	49549112	49549116	chr4	141757193	141757197	CALL_2233	48621425	141164311	1	0	16	Unchained	Complex	HET	UNK
PC3	chr18	49555913	49555918	chr4	147864258	147864263	CALL_2131	48621425	147018031	1	0	16	Unchained	Complex	HET	UNK
PC3	chr19	21774133	21774149	chr19	22154285	22154301	CALL_2165	20384533	22125515	.	.	Unchained	Unchained	Simple	HOM	DUP
PC3	chr19	340120	340134	chr19	49644271	49644285	CALL_2027	253377	48869404	1	0	Unchained	Unchained	Simple	HET	UNK
PC3	chr19	4465070	4465076	chr5	68339659	68339665	CALL_2056	2779553	66453828	0	1	17	Unchained	Complex	HET	UNK
PC3	chr19	42777192	42777195	chr19	42827578	42827581	CALL_1903	42682368	42682368	0	0	Unchained	Unchained	Simple	HET	DEL
PC3	chr2	166199224	166199242	chr2	167559194	167559212	CALL_2237	164107739	164107739	1	1	Unchained	Unchained	Simple	HET	UNK
PC3	chr2	34695770	34695785	chr2	34736553	34736568	CALL_1860	33968847	33968847	0	0	Unchained	Unchained	Simple	HET	DEL
PC3	chr2	58319602	58319619	chr2	58468632	58468633	CALL_2040	57952133	57952133	0	0	Unchained	Unchained	Simple	HET	DEL
PC3	chr20	1561094	1561108	chr20	1594161	1594164	CALL_1747	11795	11795	0	0	Unchained	Unchained	Simple	HET	DEL
PC3	chr20	15030485	15030488	chr20	15183624	15183629	CALL_2268	14212661	14212661	0	0	Unchained	Unchained	Simple	HET	DEL
PC3	chr20	25587317	25587321	chr4	18403860	18403864	CALL_2269	24615209	18108890	0	1	Unchained	Unchained	Simple	HET	UNK
PC3	chr22	32718376	32718379	chr5	68339486	68339489	CALL_2112	32326470	66453828	0	1	17	Unchained	Complex	HET	UNK
PC3	chr3	116732205	116732220	chr3	120121007	120121022	CALL_2113	116187853	119881519	0	0	9	7	Complex	HET	UNK
PC3	chr3	124373221	124373226	chr4	75186266	75186271	CALL_2238	124032378	74768765	.	.	Unchained	Unchained	Simple	HET	UNK
PC3	chr3	129763382	129763396	chr3	129806731	129806745	CALL_1852	128865750	128865750	1	1	Unchained	Unchained	Simple	HET	DEL
PC3	chr3	145856797	145856814	chr3	158703353	158703370	CALL_2239	142537449	156947360	0	1	15	Unchained	Complex	HET	UNK
PC3	chr3	157805476	157805483	chr4	78228243	78228250	CALL_2185	156947360	75915882	1	1	15	8	Complex	HET	UNK
PC3	chr3	162511991	162512007	chr3	162626339	162626355	CALL_2167	162216770	162216770	0	0	Unchained	Unchained	Simple	HET	DEL
PC3	chr3	63608114	63608118	chr9	80600947	80600951	CALL_1954	62896368	80456273	1	1	19	Unchained	Complex	HET	UNK
PC3	chr3	70660582	70660586	chr9	80644916	80644920	CALL_1931	69739535	80456273	1	1	19	Unchained	Complex	HET	UNK
PC3	chr4	70123449	70123468	chr4	70232298	70232317	CALL_2010	69524659	69524659	1	1	Unchained	Unchained	Simple	HET	DEL
PC3	chr4	90763188	90763189	chr4	91057556	91057567	CALL_1883	90628174	90979015	.	.	Unchained	Unchained	Simple	HOM	DUP
PC3	chr5	102356981	102356983	chr5	180305809	180305811	CALL_2189	101097241	180047463	0	0	20	Unchained	Complex	HET	DISTAL
PC3	chr5	103355809	103355824	chr5	103833375	103833390	CALL_2149	103032191	103581594	.	.	Unchained	Unchained	Simple	HOM	DUP
PC3	chr5	106906019	106906036	chr5	156649104	156649121	CALL_2092	105407197	156352631	0	1	Unchained	Unchained	Simple	HET	UNK
PC3	chr5	108708429	108708444	chr5	110528554	110528572	CALL_2190	107254829	110297893	1	1	20	Unchained	Complex	HET	UNK
PC3	chr5	110523123	110523138	chr5	180293305	180293320	CALL_2277	110297893	180047463	1	0	20	Unchained	Complex	HET	UNK
PC3	chr5	110607114	110607129	chr5	127863517	127863532	CALL_2244	110297893	127065284	1	0	20	Unchained	Complex	HET	UNK
PC3	chr5	127127117	127127119	chr5	163000452	163000454	CALL_2278	127065284	162849498	0	1	20	Unchained	Complex	HET	DISTAL
PC3	chr5	128869014	128869036	chr5	177552331	177552353	CALL_1997	127065284	176679602	0	0	20	9	Complex	HET	UNK
PC3	chr5	138101563	138101579	chr5	138316567	138316580	CALL_2061	136209093	138294787	1	0	Unchained	Unchained	Simple	HET	DEL
PC3	chr5	140063757	140063759	chr5	177553451	177553453	CALL_2246	139517123	176679602	1	0	20	9	Complex	HET	DISTAL
PC3	chr5	145377642	145377662	chr5	147815045	147815065	CALL_2247	144541978	146995683	1	0	20	Unchained	Complex	HET	UNK
PC3	chr5	147822797	147822817	chr5	162196897	162196917	CALL_2191	146995683	161616459	0	0	20	Unchained	Complex	HET	UNK
PC3	chr5	147840288	147840290	chr5	180302858	180302860	CALL_2133	146995683	180047463	0	0	20	Unchained	Complex	HET	DISTAL
PC3	chr5	156554890	156554906	chr5	177547355	177547371	CALL_2042	156352631	176679602	1	0	20	9	Complex	HET	UNK
PC3	chr5	156554905	156554907	chr5	167339218	167339220	CALL_2093	156352631	166682754	1	0	20	9	Complex	HET	DISTAL
PC3	chr5	157836613	157836628	chr5	162261692	162261707	CALL_2171	156352631	161616459	1	0	20	Unchained	Complex	HET	UNK
PC3	chr5	160539681	160539702	chr5	161084072	161084093	CALL_2248	159214407	160929966	0	0	Unchained	Unchained	Simple	HET	UNK
PC3	chr5	167249320	167249329	chr5	173775299	173775306	CALL_2249	166682754	170866884	0	0	20	Unchained	Complex	HET	UNK
PC3	chr5	167339386	167339404	chr5	177553068	177553086	CALL_2062	166682754	176679602	0	0	20	9	Complex	HET	UNK
PC3	chr5	19846296	19846299	chr5	19960594	19960597	CALL_2041	19489923	19489923	1	1	Unchained	Unchained	Simple	HET	DEL
PC3	chr5	58435674	58435691	chr5	58686379	58686396	CALL_2273	56378765	58424968	0	1	Unchained	Unchained	Simple	HET	DEL
PC3	chr5	61777720	61777787	chr5	148383023	148383355	CALL_2210	61209008	147985468	0	0	Unchained	Unchained	Simple	HET	UNK
PC3	chr5	67047111	67047126	chr5	146944016	146944031	CALL_2132	66453828	145944752	0	0	Unchained	Unchained	Simple	HET	UNK
PC3	chr5	80889126	80889128	chr5	82929753	82929755	CALL_2241	80375059	80375059	0	0	Unchained	Unchained	Simple	HET	DISTAL
PC3	chr5	86267444	86267461	chr5	113579306	113579323	CALL_2170	86159773	111521112	0	1	21	Unchained	Complex	HET	UNK
PC3	chr5	87372259	87372261	chr5	88759648	88759650	CALL_2188	86159773	88571041	0	0	21	Unchained	Complex	HET	DISTAL
PC3	chr5	91314085	91314103	chr5	110589910	110589928	CALL_2275	90448745	110297893	0	1	20	Unchained	Complex	HET	UNK
PC3	chr5	92139188	92139219	chr5	153001219	153001250	CALL_2116	92064447	150941988	0	1	Unchained	Unchained	Simple	HET	UNK
PC3	chr5	96043857	96043875	chr5	112454509	112454527	CALL_2091	94536879	111521112	0	1	21	Unchained	Complex	HET	UNK
PC3	chr5	96164441	96164451	chr5	97337716	97337732	CALL_2276	94536879	96684758	0	0	21	Unchained	Complex	HET	UNK
PC3	chr5	97726631	97726665	chr5	100448022	100448056	CALL_2242	96684758	100126378	0	1	Unchained	Unchained	Simple	HET	UNK
PC3	chr5	98907673	98907701	chr5	101860493	101860521	CALL_2243	98563636	101097241	1	0	Unchained	Unchained	Simple	HET	UNK
PC3	chr6	147979498	147979516	chr6	148072533	148072551	CALL_2044	147597599	147597599	1	1	Unchained	Unchained	Simple	HET	DEL
PC3	chr6	29855917	29855933	chr6	29910715	29910731	CALL_1975	29833110	29833110	1	1	Unchained	Unchained	Simple	HET	UNK
PC3	chr6	32450719	32450727	chr6	32558383	32558394	CALL_1964	32247705	32247705	.	.	22	Unchained	Complex	HOM	DUP
PC3	chr6	32472961	32472973	chr6	32511618	32511619	CALL_1924	32247705	32247705	0	0	22	Unchained	Complex	HET	UNK
PC3	chr6	67008730	67008748	chr6	67049001	67049019	CALL_2070	66191786	66191786	0	0	Unchained	Unchained	Simple	HET	DEL
PC3	chr7	133901086	133901103	chr7	133980849	133980866	CALL_2280	133563029	133563029	1	1	Unchained	Unchained	Simple	HET	DUP
PC3	chr7	68965174	68965177	chr7	69150945	69150948	CALL_1904	68870244	68870244	.	.	Unchained	Unchained	Simple	HOM	DUP
PC3	chr8	119554594	119554610	chr8	137653000	137653016	CALL_1876	118686330	134837621	.	.	18	5	Complex	HET	UNK
PC3	chr8	119578256	119578266	chr8	131867859	131867860	CALL_2021	118686330	131648080	.	.	18	5	Complex	HET	UNK
PC3	chr8	119846703	119846716	chr8	138281027	138281040	CALL_2022	119541465	138012395	.	.	18	Unchained	Complex	HET	UNK
PC3	chr8	120063899	120063916	chr8	138251127	138251140	CALL_1391	119541465	138012395	0	1	18	1	Complex	HET	UNK
PC3	chr8	120063917	120063919	chr8	142287605	142287607	CALL_2150	119541465	141632894	.	.	18	1	Complex	HET	DISTAL
PC3	chr8	120127106	120127114	chr8	127322738	127322755	CALL_1579	119541465	127116411	0	0	18	Unchained	Complex	HET	UNK
PC3	chr8	122374875	122374894	chr8	127260868	127260869	CALL_1711	122186232	127116411	0	0	18	4	Complex	HET	UNK
PC3	chr8	122374895	122374897	chr8	127653529	127653531	CALL_1804	122186232	127418069	0	0	18	4	Complex	HET	DISTAL
PC3	chr8	122488838	122488840	chr8	123787730	123787732	CALL_1658	122186232	123704937	0	0	18	3	Complex	HET	DISTAL
PC3	chr8	122488954	122488963	chr8	138328868	138328885	CALL_1781	122186232	138012395	.	.	18	3	Complex	HET	UNK
PC3	chr8	122440201	122440204	chr8	137586999	137587006	CALL_2136	122430221	134837621	0	0	18	Unchained	Complex	HET	UNK
PC3	chr8	122963852	122963854	chr8	139521543	139521545	CALL_2096	122465756	138012395	1	1	18	Unchained	Complex	HET	DISTAL
PC3	chr8	122963907	122963922	chr8	138016666	138016681	CALL_1700	122465756	138012395	1	0	18	Unchained	Complex	HET	UNK
PC3	chr8	123787730	123787732	chr8	138328886	138328888	CALL_1984	123704937	138012395	0	0	18	3	Complex	HET	DISTAL
PC3	chr8	124967610	124967611	chr8	129565692	129565700	CALL_1567	124033035	129370268	.	.	18	2	Complex	HET	UNK
PC3	chr8	124988112	124988113	chr8	140193997	140193998	CALL_1831	124033035	140046102	.	.	18	2	Complex	HET	UNK
PC3	chr8	127276497	127276512	chr8	127653608	127653609	CALL_2174	127116411	127418069	.	.	18	4	Complex	HET	INV
PC3	chr8	127513273	127513283	chr8	139399352	139399360	CALL_1966	127418069	138012395	.	.	18	Unchained	Complex	HET	UNK
PC3	chr8	127516683	127516698	chr8	128805390	128805405	CALL_2064	127418069	128192088	.	.	18	Unchained	Complex	HET	UNK
PC3	chr8	127578800	127578811	chr8	142262190	142262200	CALL_1739	127418069	141632894	0	0	18	Unchained	Complex	HET	UNK
PC3	chr8	128816748	128816750	chr8	129565706	129565708	CALL_1956	128192088	129571674	0	0	18	2	Complex	HET	DISTAL
PC3	chr8	128845076	128845078	chr8	140600000	140600002	CALL_2023	128192088	140369874	.	.	18	Unchained	Complex	HET	DISTAL
PC3	chr8	128867955	128867956	chr8	145598224	145598237	CALL_1529	128192088	145466312	0	0	18	Unchained	Complex	HET	UNK
PC3	chr8	129565733	129565735	chr8	140193998	140194000	CALL_1948	129370268	140046102	.	.	18	2	Complex	HET	DISTAL
PC3	chr8	129608891	129608893	chr8	138371168	138371170	CALL_1888	129571674	138012395	1	0	18	Unchained	Complex	HET	DISTAL
PC3	chr8	129620264	129620275	chr8	138085231	138085232	CALL_1609	129571674	138012395	0	0	18	Unchained	Complex	HET	UNK
PC3	chr8	129659750	129659759	chr8	137882804	137882811	CALL_1372	129571674	137654062	1	0	18	Unchained	Complex	HET	UNK
PC3	chr8	131467765	131467766	chr8	142205428	142205437	CALL_1345	129571674	141632894	0	0	18	Unchained	Complex	HET	UNK
PC3	chr8	131867780	131867782	chr8	137652941	137652943	CALL_2000	131648080	134837621	0	0	18	5	Complex	HET	DISTAL
PC3	chr8	131885594	131885595	chr8	139247470	139247480	CALL_1616	131648080	138012395	0	1	18	Unchained	Complex	HET	UNK
PC3	chr8	137587035	137587037	chr8	140348865	140348867	CALL_2251	134837621	140046102	0	1	18	Unchained	Complex	HET	DISTAL
PC3	chr8	138021796	138021804	chr8	139437138	139437152	CALL_2097	137654062	138012395	.	.	18	Unchained	Complex	HET	UNK
PC3	chr8	138027416	138027433	chr8	139293457	139293474	CALL_2253	138012395	138012395	1	1	18	Unchained	Complex	HET	UNK
PC3	chr8	138147330	138147352	chr8	140379202	140379224	CALL_1985	138012395	140046102	0	0	23	6	Complex	HET	UNK
PC3	chr8	138151368	138151386	chr8	145279437	145279450	CALL_2117	138012395	144940284	0	1	23	6	Complex	HET	UNK
PC3	chr8	138286142	138286150	chr8	142288059	142288070	CALL_1636	138012395	141632894	1	0	18	1	Complex	HET	UNK
PC3	chr8	139247457	139247459	chr8	139401020	139401022	CALL_2196	138012395	138012395	.	.	18	Unchained	Complex	HET	INV
PC3	chr8	139383583	139383584	chr8	140205326	140205328	CALL_2254	138012395	140046102	.	.	18	Unchained	Complex	HET	UNK
PC3	chr8	140379143	140379145	chr8	145279314	145279316	CALL_2175	140046102	144940284	0	1	23	6	Complex	HET	DISTAL
PC3	chr8	99204404	99204423	chr8	100359805	100359824	CALL_2046	96499490	96499490	0	0	Unchained	Unchained	Simple	HET	UNK
PC3	chr9	29372721	29372739	chr9	29461564	29461582	CALL_2256	28002030	28002030	1	1	Unchained	Unchained	Simple	HET	DEL
PC3	chr9	9015026	9015045	chr9	9463694	9463713	CALL_2214	6086394	6086394	0	0	15	Unchained	Complex	HET	DEL
PC3	chr9	9259340	9259354	chr9	9438471	9438485	CALL_2281	6086394	6086394	0	0	15	Unchained	Complex	HET	DEL
PC3	chr9	9562240	9562270	chr9	9649897	9649927	CALL_2215	6086394	6086394	0	0	15	Unchained	Complex	HET	DEL
PC3	chr9	80601069	80601084	chr9	86189771	86189787	CALL_2152	80456273	81061849	1	0	19	Unchained	Complex	HET	UNK
PC3	chrX	121092806	121092822	chrX	121385954	121385971	CALL_2119	120930768	121256944	.	.	Unchained	Unchained	Simple	HOM	DUP
PC3	chrX	12728698	12728700	chrX	12844767	12844769	CALL_2118	12662145	12662145	.	.	Unchained	Unchained	Simple	HOM	DUP
DU145	chr10	115445232	115445233	chr10	115539682	115539685	CALL_1335	105176379	105176379	0	0	Unchained	Unchained	Simple	HET	DEL
DU145	chr20	1561078	1561095	chr20	1594282	1594299	CALL_1210	10828	10828	1	1	Unchained	Unchained	Simple	HET	DEL
DU145	chr4	140671726	140671752	chr4	141056924	141056950	CALL_1379	120468266	140978694	0	0	1	Unchained	Complex	HET	DEL
DU145	chr10	17401121	17401126	chr4	144740509	144740514	CALL_1399	12082	140978694	0	0	1	Unchained	Complex	HET	UNK
DU145	chr8	39232074	39232088	chr8	39387215	39387229	CALL_1180	12117023	12117023	1	1	Unchained	Unchained	Simple	HET	DEL
DU145	chr8	145610993	145610995	chr8	145860201	145860203	CALL_1386	145417507	145417507	1	1	Unchained	Unchained	Simple	HET	DEL
DU145	chr6	148127061	148127064	chr6	148300562	148300565	CALL_1019	147521147	148255109	.	.	Unchained	Unchained	Simple	HOM	DEL
DU145	chr1	152555549	152555558	chr1	152587801	152587815	CALL_1136	152210842	152210842	1	1	Unchained	Unchained	Simple	HET	DEL
DU145	chr1	154235386	154235390	chr2	80906496	80906500	CALL_1305	152210842	68862908	0	0	2	Unchained	Complex	HET	UNK
DU145	chr6	159334056	159334058	chr6	159485710	159485712	CALL_1396	158947154	158947154	.	.	Unchained	Unchained	Simple	HOM	DUP
DU145	chr1	161671617	161671622	chr19	11225055	11225060	CALL_1358	161443240	10829101	1	1	Unchained	Unchained	Simple	HET	UNK
DU145	chr22	17647542	17647544	chr3	134748122	134748124	CALL_1361	16799871	134553150	1	1	Unchained	Unchained	Simple	HET	DISTAL
DU145	chr6	169271509	169271518	chr6	169312937	169312945	CALL_1336	169269545	169288150	0	0	Unchained	Unchained	Simple	HET	INV
DU145	chr12	17921943	17921945	chr12	18011980	18011982	CALL_1240	17791989	17791989	.	.	Unchained	Unchained	Simple	HET	INV
DU145	chr2	237045210	237045211	chr2	237113091	237113092	CALL_1340	179343124	179343124	0	0	Unchained	Unchained	Simple	HET	DUP
DU145	chr18	24906176	24906191	chr18	24969132	24969147	CALL_1297	18596544	18596544	0	0	3	Unchained	Complex	HET	DEL
DU145	chr12	23597122	23597126	chr14	28002147	28002151	CALL_1230	22808405	27892193	1	0	3	Unchained	Complex	HET	UNK
DU145	chr12	25412935	25412943	chr12	25451231	25451242	CALL_807	22808405	22808405	1	1	3	1	Complex	HET	DEL
DU145	chr12	25459490	25459492	chr22	21949627	21949629	CALL_1309	22808405	20692679	1	1	3	1	Complex	HET	DISTAL
DU145	chr12	25459933	25459935	chr22	21970746	21970748	CALL_1294	22808405	20692679	1	1	3	1	Complex	HET	DISTAL
DU145	chr17	26840555	26840558	chr17	26974099	26974100	CALL_1233	25220415	25220415	1	1	Unchained	Unchained	Simple	HET	DUP
DU145	chr2	34695829	34695832	chr2	34736565	34736568	CALL_945	26510993	26510993	.	.	Unchained	Unchained	Simple	HOM	DEL
DU145	chr6	29736996	29737005	chr6	29967134	29967146	CALL_1353	26803448	26803448	.	.	4	2	Complex	HOM	DUP
DU145	chr6	29740802	29740821	chr6	29784550	29784561	CALL_1331	26803448	26803448	0	0	4	2	Complex	HET	UNK
DU145	chr6	29772475	29772485	chr6	29866295	29866308	CALL_1344	26803448	26803448	0	0	4	2	Complex	HET	DEL
DU145	chr14	27983991	27983992	chr18	32806404	32806409	CALL_1218	27892193	18596544	0	0	3	Unchained	Complex	HET	UNK
DU145	chr14	30724341	30724357	chr14	32084867	32084884	CALL_1272	27892193	27892193	0	0	3	Unchained	Complex	HET	UNK
DU145	chr14	32092676	32092691	chr14	33503580	33503595	CALL_1301	27892193	27892193	0	0	3	Unchained	Complex	HET	UNK
DU145	chr16	30012741	30012756	chr16	30058931	30058952	CALL_1343	29276264	29276264	0	0	Unchained	Unchained	Simple	HET	INV
DU145	chr11	30877330	30877333	chr11	30930733	30930736	CALL_1349	30703534	30919428	1	0	Unchained	Unchained	Simple	HET	DUP
DU145	chr6	32484431	32484432	chr6	32519813	32519814	CALL_1314	31238990	31238990	0	0	Unchained	Unchained	Simple	HET	UNK
DU145	chr16	34396037	34396050	chr16	34464563	34464571	CALL_1323	34173918	34173918	0	0	Unchained	Unchained	Simple	HET	INV
DU145	chr14	37186309	37186311	chr14	52469558	52469560	CALL_1219	36356745	36356745	0	0	5	3	Complex	HET	DISTAL
DU145	chr14	37186408	37186413	chr14	46559021	46559038	CALL_1150	36356745	36356745	0	0	5	3	Complex	HET	UNK
DU145	chr14	41609267	41609282	chr14	41669649	41669665	CALL_731	36356745	36356745	.	.	5	Unchained	Complex	HOM	DEL
DU145	chr14	46536175	46536176	chr14	52469963	52469973	CALL_1077	36356745	36356745	0	0	5	3	Complex	HET	UNK
DU145	chr14	88776584	88776598	chr14	88864090	88864104	CALL_1196	36356745	88776264	0	1	5	Unchained	Complex	HET	DEL
DU145	chr17	52309529	52309530	chr17	52364529	52364530	CALL_1244	47033579	47033579	1	1	Unchained	Unchained	Simple	HET	DEL
DU145	chr11	48531817	48531822	chr12	33916559	33916564	CALL_1392	47841703	33919756	0	1	Unchained	Unchained	Simple	HET	UNK
DU145	chr10	76928627	76928641	chr10	77029377	77029502	CALL_1382	51860360	51860360	1	1	Unchained	Unchained	Simple	HET	DUP
DU145	chr16	78565690	78565706	chr16	78720070	78720086	CALL_1338	54111678	54111678	1	1	Unchained	Unchained	Simple	HET	DEL
DU145	chr13	57752540	57752543	chr13	57788861	57788864	CALL_1067	57597892	57597892	.	.	Unchained	Unchained	Simple	HOM	DEL
DU145	chr3	60675166	60675172	chr3	60705514	60705579	CALL_1313	60544684	60544684	0	0	6	Unchained	Complex	HET	DEL
DU145	chr3	60890727	60890743	chr3	60932432	60932448	CALL_1249	60544684	60544684	1	1	6	Unchained	Complex	HET	DEL
DU145	chr6	62731003	62731071	chr6	66299000	66299068	CALL_1365	62152163	66079814	1	0	Unchained	Unchained	Simple	HET	UNK
DU145	chr20	14729510	14729525	chr20	15203857	15203872	CALL_1362	6406884	15107971	1	1	Unchained	Unchained	Simple	HET	DEL
DU145	chr12	80067822	80067825	chr12	80098943	80098944	CALL_1282	64239665	64239665	0	0	Unchained	Unchained	Simple	HET	UNK
DU145	chr2	80514743	80514759	chr2	80641983	80641992	CALL_1207	68862908	68862908	0	0	2	Unchained	Complex	HET	DEL
DU145	chr1	72766324	72766340	chr1	72811824	72811840	CALL_1045	71739279	71739279	.	.	Unchained	Unchained	Simple	HOM	DEL
DU145	chr7	102879840	102879857	chr7	102984239	102984252	CALL_1304	74746113	74746113	1	1	Unchained	Unchained	Simple	HET	DUP
DU145	chr3	87958226	87958227	chr3	88111046	88111047	CALL_1325	86710237	88029053	1	1	Unchained	Unchained	Simple	HET	INV
DU145	chr11	114401335	114401340	chrY	6136789	6136794	CALL_1412	96394309	NA	0	0	7	Unchained	Complex	HET	UNK
DU145	chr11	119471576	119471584	chr11	119786067	119786080	CALL_1165	96394309	96394309	.	.	7	Unchained	Complex	HOM	DUP
CWR22Rv1	chr5	114541550	114541564	chr5	118233501	118233515	CALL_917	104456706	104456706	0	0	Unchained	Unchained	Simple	HET	UNK
CWR22Rv1	chr2	115450092	115450109	chr2	116333356	116333369	CALL_773	114540366	114540366	0	0	1	Unchained	Complex	HET	UNK
CWR22Rv1	chr2	115454555	115454572	chr2	116037547	116037564	CALL_953	114540366	114540366	.	.	1	5	Complex	HOM	UNK
CWR22Rv1	chr2	115716504	115716519	chr2	179792629	179792644	CALL_871	114540366	179313513	0	1	1	5	Complex	HET	UNK
CWR22Rv1	chr2	115743949	115743962	chr2	117145331	117145347	CALL_860	114540366	114540366	0	0	1	5	Complex	HET	UNK
CWR22Rv1	chr2	115994759	115994768	chr2	180240035	180240048	CALL_872	114540366	179313513	0	1	1	5	Complex	HET	UNK
CWR22Rv1	chr2	116008412	116008427	chr2	179737721	179737736	CALL_815	114540366	179313513	0	1	1	5	Complex	HET	UNK
CWR22Rv1	chr2	116633047	116633064	chr2	180233256	180233273	CALL_894	114540366	179313513	0	1	1	Unchained	Complex	HET	UNK
CWR22Rv1	chr2	116639755	116639769	chr2	179314008	179314022	CALL_861	114540366	177526792	0	1	1	Unchained	Complex	HET	UNK
CWR22Rv1	chr3	129763382	129763397	chr3	129806731	129806746	CALL_706	127193253	127193253	1	1	Unchained	Unchained	Simple	HET	DEL
CWR22Rv1	chr12	17890507	17890509	chr12	17922609	17922611	CALL_846	13168858	13168858	0	0	2	3	Complex	HET	INV
CWR22Rv1	chr12	17899006	17899008	chr12	18009948	18009950	CALL_957	13168858	13168858	.	.	2	3	Complex	HOM	DUP
CWR22Rv1	chr12	17921944	17921946	chr12	18011912	18011914	CALL_742	13168858	13168858	0	0	2	3	Complex	HET	INV
CWR22Rv1	chr12	17923043	17923045	chr12	18040525	18040527	CALL_901	13168858	13168858	.	.	2	3	Complex	HOM	DUP
CWR22Rv1	chr2	144228409	144228425	chr2	144958878	144958894	CALL_862	143238281	143238281	1	1	3	1	Complex	HET	UNK
CWR22Rv1	chr2	144537904	144537917	chr2	144616958	144616969	CALL_863	143238281	143238281	1	1	3	Unchained	Complex	HET	DEL
CWR22Rv1	chr4	151757910	151757928	chr4	152567121	152567139	CALL_876	147212401	147212401	1	1	Unchained	Unchained	Simple	HET	UNK
CWR22Rv1	chr1	152555542	152555558	chr1	152587747	152587763	CALL_796	152361219	152361219	0	0	Unchained	Unchained	Simple	HET	DEL
CWR22Rv1	chr1	155559000	155559002	chr1	155682001	155682003	CALL_797	154504224	154504224	0	0	Unchained	Unchained	Simple	HET	DEL
CWR22Rv1	chr6	161647026	161647029	chr6	161961903	161961906	CALL_822	160193411	160193411	0	0	Unchained	Unchained	Simple	HET	DEL
CWR22Rv1	chr3	162512134	162512149	chr3	162626320	162626335	CALL_816	162156741	162156741	0	0	Unchained	Unchained	Simple	HET	DEL
CWR22Rv1	chr5	166229041	166229055	chr5	166348818	166348832	CALL_777	162231338	162231338	1	1	Unchained	Unchained	Simple	HET	DEL
CWR22Rv1	chr6	166483108	166483124	chr6	167020448	167020464	CALL_878	165315847	165315847	0	0	Unchained	Unchained	Simple	HET	UNK
CWR22Rv1	chr6	169626201	169626215	chr6	169671258	169671259	CALL_784	169390767	169390767	0	0	Unchained	Unchained	Simple	HET	DEL
CWR22Rv1	chr4	174152987	174153003	chr4	174230284	174230300	CALL_877	173755429	174190443	1	0	Unchained	Unchained	Simple	HET	DEL
CWR22Rv1	chr4	180502989	180503004	chr4	181020357	181020370	CALL_842	177255999	177255999	.	.	Unchained	Unchained	Simple	HOM	UNK
CWR22Rv1	chr2	185417804	185417809	chr2	185461444	185461447	CALL_751	183476895	183476895	1	1	Unchained	Unchained	Simple	HET	DEL
CWR22Rv1	chr16	19775049	19775061	chr16	19907834	19907841	CALL_769	19348589	19348589	.	.	Unchained	Unchained	Simple	HOM	DUP
CWR22Rv1	chr20	1561059	1561074	chr20	1594179	1594194	CALL_747	224902	224902	0	0	Unchained	Unchained	Simple	HET	DEL
CWR22Rv1	chr1	239843955	239843970	chr1	239966892	239966901	CALL_749	234949947	234949947	.	.	Unchained	Unchained	Simple	HOM	DUP
CWR22Rv1	chr6	29838647	29838672	chr6	29894177	29894203	CALL_771	28565076	28565076	1	1	Unchained	Unchained	Simple	HET	UNK
CWR22Rv1	chr9	30921836	30921850	chr9	34718258	34718321	CALL_809	30907249	32609466	1	1	Unchained	Unchained	Simple	HET	UNK
CWR22Rv1	chr6	32450740	32450748	chr6	32558370	32558380	CALL_792	31324150	31324150	.	.	4	Unchained	Complex	HOM	DUP
CWR22Rv1	chr6	32469631	32469632	chr6	32507910	32507911	CALL_817	31324150	31324150	0	0	4	Unchained	Complex	HET	UNK
CWR22Rv1	chr8	39232074	39232093	chr8	39387210	39387229	CALL_835	31791373	31791373	0	0	Unchained	Unchained	Simple	HET	DEL
CWR22Rv1	chr4	34779944	34779957	chr4	34828973	34828986	CALL_783	34637423	34637423	1	1	Unchained	Unchained	Simple	HET	DEL
CWR22Rv1	chr2	40085447	40085451	chr4	169896458	169896462	CALL_905	39150342	168844705	0	0	5	Unchained	Complex	HET	UNK
CWR22Rv1	chr22	39354678	39354703	chr22	39393941	39393966	CALL_789	39309941	39309941	0	0	Unchained	Unchained	Simple	HET	DEL
CWR22Rv1	chr14	41608991	41608993	chr14	41669664	41669666	CALL_911	40897634	40897634	0	0	Unchained	Unchained	Simple	HET	DEL
CWR22Rv1	chr21	43407187	43407189	chr21	43971132	43971134	CALL_909	43263109	43263109	1	1	Unchained	Unchained	Simple	HET	DISTAL
CWR22Rv1	chr2	50826202	50826207	chr4	170308507	170308511	CALL_939	49718087	168844705	1	0	5	4	Complex	HET	UNK
CWR22Rv1	chr2	50826223	50826225	chr2	53444744	53444746	CALL_952	49718087	51698298	1	1	5	4	Complex	HET	DISTAL
CWR22Rv1	chr2	51953995	51954005	chr2	54027777	54027792	CALL_859	51698298	51698298	0	0	6	Unchained	Complex	HET	UNK
CWR22Rv1	chr2	52667040	52667041	chr4	175718635	175718636	CALL_854	51698298	175515900	0	0	6	Unchained	Complex	HET	UNK
CWR22Rv1	chr2	53445014	53445019	chr4	170297403	170297408	CALL_926	51698298	168844705	1	0	5	4	Complex	HET	UNK
CWR22Rv1	chr7	54301279	54301281	chr7	54389009	54389011	CALL_804	53916297	53916297	1	1	Unchained	Unchained	Simple	HET	INV
CWR22Rv1	chr10	54948749	54948755	chr2	144931025	144931031	CALL_889	54680782	143238281	0	1	3	1	Complex	HET	UNK
CWR22Rv1	chr10	54978353	54978357	chr2	145532063	145532067	CALL_921	54680782	143238281	0	0	3	1	Complex	HET	UNK
CWR22Rv1	chr10	55132689	55132702	chr10	55349094	55349108	CALL_798	54680782	54680782	0	0	3	Unchained	Complex	HET	DEL
CWR22Rv1	chr11	63392219	63392222	chr11	63449118	63449121	CALL_858	61567711	61567711	0	0	Unchained	Unchained	Simple	HET	DUP
CWR22Rv1	chr5	65369995	65369997	chr5	65556281	65556283	CALL_886	65204236	65204236	0	0	Unchained	Unchained	Simple	HET	DEL
CWR22Rv1	chr1	72766324	72766327	chr1	72811837	72811840	CALL_763	72579436	72579436	0	0	Unchained	Unchained	Simple	HET	DEL
CWR22Rv1	chr6	78967003	78967019	chr6	79036460	79036476	CALL_963	75897031	75897031	0	0	Unchained	Unchained	Simple	HET	DEL
CWR22Rv1	chr16	77407870	77407884	chr16	78375497	78375510	CALL_869	76390331	77777346	1	1	Unchained	Unchained	Simple	HET	UNK
CWR22Rv1	chr2	79902544	79902551	chr2	84450258	84450272	CALL_891	79490653	82482050	0	1	7	Unchained	Complex	HET	UNK
CWR22Rv1	chr2	80154312	80154325	chr2	83401123	83401136	CALL_855	79490653	82482050	0	0	7	Unchained	Complex	HET	UNK
CWR22Rv1	chr2	80286751	80286766	chr2	85117767	85117782	CALL_906	79490653	84563691	0	0	7	Unchained	Complex	HET	UNK
CWR22Rv1	chr2	80660424	80660438	chr2	84439868	84439882	CALL_892	80398118	82482050	0	1	7	Unchained	Complex	HET	UNK
CWR22Rv1	chr2	81055131	81055148	chr2	81099471	81099488	CALL_833	80398118	80398118	0	0	7	2	Complex	HET	UNK
CWR22Rv1	chr2	81055147	81055149	chr2	85574944	85574946	CALL_907	80398118	84563691	0	0	7	2	Complex	HET	DISTAL
CWR22Rv1	chr2	83168111	83168126	chr2	85563010	85563025	CALL_908	82482050	84563691	1	0	7	Unchained	Complex	HET	UNK
CWR22Rv1	chr2	83204756	83204774	chr2	85095935	85095953	CALL_819	82482050	84563691	1	0	7	Unchained	Complex	HET	UNK
CWR22Rv1	chr14	84670837	84670850	chr14	93954953	93954969	CALL_934	83816989	92286873	1	1	Unchained	Unchained	Simple	HET	UNK
CWR22Rv1	chr2	85574942	85574945	chr2	85620433	85620436	CALL_801	84563691	84563691	0	0	7	2	Complex	HET	INV
CWR22Rv1	chr14	97885847	97885849	chr6	97492456	97492458	CALL_884	96826481	95830967	1	1	Unchained	Unchained	Simple	HET	DISTAL
MDA-PCa-2b	chr7	117436969	117436986	chr7	121264146	121264163	CALL_276	100625171	100625171	1	1	1	1	Complex	HET	UNK
MDA-PCa-2b	chr7	119628566	119628579	chr7	119660021	119660023	CALL_283	100625171	100625171	1	1	1	1	Complex	HET	DEL
MDA-PCa-2b	chr7	119662845	119662860	chr7	152025998	152026013	CALL_367	100625171	143419872	1	0	1	1	Complex	HET	UNK
MDA-PCa-2b	chr7	119663231	119663247	chr7	121562110	121562126	CALL_330	100625171	100625171	1	1	1	1	Complex	HET	UNK
MDA-PCa-2b	chr20	1561092	1561106	chr20	1594145	1594159	CALL_86	10479	10479	.	.	Unchained	Unchained	Simple	HOM	DEL
MDA-PCa-2b	chr3	116516803	116516806	chr3	116861715	116861718	CALL_193	116337848	116817347	.	.	Unchained	Unchained	Simple	HOM	UNK
MDA-PCa-2b	chr7	16082265	16082280	chr7	19622659	19622674	CALL_317	11863	11863	1	1	1	1	Complex	HET	UNK
MDA-PCa-2b	chr7	16082392	16082410	chr7	121264500	121264518	CALL_388	11863	100625171	1	1	1	1	Complex	HET	UNK
MDA-PCa-2b	chr7	16082431	16082433	chr7	117437427	117437429	CALL_343	11863	100625171	1	1	1	1	Complex	HET	DISTAL
MDA-PCa-2b	chr4	27173	27175	chr4	67999	68001	CALL_68	11965	11965	1	1	Unchained	Unchained	Simple	HET	DUP
MDA-PCa-2b	chr8	15588560	15588576	chr8	42189864	42189880	CALL_165	12461387	41637751	1	0	Unchained	Unchained	Simple	HET	UNK
MDA-PCa-2b	chr3	132104078	132104083	chr4	38772397	38772402	CALL_449	131813231	9487207	1	0	2	Unchained	Complex	HET	UNK
MDA-PCa-2b	chr3	173460910	173460912	chr3	173568019	173568021	CALL_415	131813231	131813231	1	1	2	3	Complex	HET	DEL
MDA-PCa-2b	chr3	173461005	173461015	chr3	178834501	178834510	CALL_325	131813231	178400428	1	1	2	3	Complex	HET	UNK
MDA-PCa-2b	chr3	173589994	173589996	chr3	178856489	178856491	CALL_365	131813231	178400428	1	1	2	3	Complex	HET	DISTAL
MDA-PCa-2b	chr11	1915258	1915259	chr11	1961041	1961058	CALL_290	14126	14126	1	1	Unchained	Unchained	Simple	HET	INV
MDA-PCa-2b	chr21	21800663	21800666	chr21	21845222	21845223	CALL_156	14541078	14541078	1	1	Unchained	Unchained	Simple	HET	DEL
MDA-PCa-2b	chr1	152555529	152555542	chr1	152587727	152587740	CALL_159	149484370	149484370	0	0	Unchained	Unchained	Simple	HET	DEL
MDA-PCa-2b	chr2	234904276	234904280	chr5	147311903	147311907	CALL_323	149747127	70524027	0	1	Unchained	Unchained	Simple	HET	UNK
MDA-PCa-2b	chr3	184981367	184981380	chr3	185636604	185636617	CALL_274	178400428	185480528	1	1	Unchained	Unchained	Simple	HET	UNK
MDA-PCa-2b	chr18	33012100	33012118	chr18	34125659	34125677	CALL_292	18461688	18461688	0	0	Unchained	Unchained	Simple	HET	UNK
MDA-PCa-2b	chr14	21357827	21357835	chr14	21422047	21422061	CALL_230	20196645	20196645	1	1	Unchained	Unchained	Simple	HET	DEL
MDA-PCa-2b	chr14	34625388	34625406	chr14	34655812	34655830	CALL_192	20196645	20196645	0	0	Unchained	Unchained	Simple	HET	DEL
MDA-PCa-2b	chr6	32440378	32440389	chr6	32497166	32497167	CALL_180	29964126	29964126	0	0	Unchained	Unchained	Simple	HET	UNK
MDA-PCa-2b	chr15	70949321	70949336	chr15	73067650	73067665	CALL_381	30577486	71270523	0	0	Unchained	Unchained	Simple	HET	UNK
MDA-PCa-2b	chr6	40865120	40865121	chr6	40949316	40949317	CALL_280	39089581	39089581	0	0	2	2	Complex	HET	DEL
MDA-PCa-2b	chr6	42804076	42804086	chr6	143543064	143543079	CALL_316	39089581	95781017	1	1	Unchained	Unchained	Simple	HET	UNK
MDA-PCa-2b	chr13	57752540	57752543	chr13	57788861	57788864	CALL_223	42046962	42046962	0	0	Unchained	Unchained	Simple	HET	DEL
MDA-PCa-2b	chr2	43812889	43812895	chr7	19622259	19622260	CALL_363	43743794	11863	0	1	1	1	Complex	HET	UNK
MDA-PCa-2b	chr2	47681392	47681396	chr7	152025638	152025642	CALL_382	47186644	143419872	0	0	1	1	Complex	HET	UNK
MDA-PCa-2b	chr2	47682256	47682258	chr7	17184491	17184493	CALL_385	47186644	11863	0	1	1	1	Complex	HET	DISTAL
MDA-PCa-2b	chr2	52040969	52040983	chr2	54000513	54000518	CALL_342	47680090	53934184	0	0	Unchained	Unchained	Simple	HET	UNK
MDA-PCa-2b	chr2	43705978	43705991	chr2	48008114	48008125	CALL_332	5068816	47680090	1	0	Unchained	Unchained	Simple	HET	UNK
MDA-PCa-2b	chr2	43808898	43808903	chr7	17184728	17184733	CALL_380	5068816	11863	0	1	1	1	Complex	HET	UNK
MDA-PCa-2b	chr6	29733216	29733233	chr6	29961281	29961293	CALL_372	5849859	29951848	.	.	Unchained	Unchained	Simple	HOM	DUP
MDA-PCa-2b	chr1	72766324	72766327	chr1	72811837	72811840	CALL_179	59066978	59066978	1	1	Unchained	Unchained	Simple	HET	DEL
MDA-PCa-2b	chr3	58633486	58633501	chr3	58993038	58993053	CALL_308	643690	643690	1	1	3	Unchained	Complex	HET	DEL
MDA-PCa-2b	chr3	59098341	59098354	chr3	63254739	63254752	CALL_267	643690	62994463	1	1	3	Unchained	Complex	HET	UNK
MDA-PCa-2b	chr3	67692957	67692958	chr3	67744482	67744483	CALL_171	66220592	66220592	1	1	Unchained	Unchained	Simple	HET	DEL
MDA-PCa-2b	chr12	17923225	17923227	chr12	18013118	18013120	CALL_170	66467	66467	0	0	Unchained	Unchained	Simple	HET	INV
MDA-PCa-2b	chr4	69373818	69373832	chr4	69491077	69491104	CALL_253	68281553	68281553	1	1	Unchained	Unchained	Simple	HET	DEL
MDA-PCa-2b	chr16	70836191	70836195	chr6	35904602	35904606	CALL_357	70154651	29964126	0	1	2	2	Complex	HET	UNK
MDA-PCa-2b	chr16	71510561	71510587	chr6	40864995	40864996	CALL_298	70154651	39089581	0	0	2	2	Complex	HET	UNK
MDA-PCa-2b	chr16	71510581	71510585	chr6	35912501	35912505	CALL_399	70154651	29964126	0	1	2	2	Complex	HET	UNK
MDA-PCa-2b	chr16	80679660	80679674	chr16	80712712	80712720	CALL_202	70154651	70154651	0	0	2	Unchained	Complex	HET	DEL
MDA-PCa-2b	chr5	143824278	143824283	chr7	13335463	13335464	CALL_301	70524027	11863	1	1	1	Unchained	Complex	HET	UNK
MDA-PCa-2b	chr10	105485157	105485172	chr10	105698225	105698238	CALL_352	74802437	74802437	1	1	Unchained	Unchained	Simple	HET	DEL
MDA-PCa-2b	chr8	115594921	115594923	chr8	115633875	115633877	CALL_348	86841425	86841425	0	0	Unchained	Unchained	Simple	HET	INV
MDA-PCa-2b	chr3	103463960	103463975	chr3	132113618	132113637	CALL_457	93455551	131813231	0	1	2	Unchained	Complex	HET	UNK
MDA-PCa-2b	chr3	103513196	103513197	chr6	40949322	40949323	CALL_351	93455551	39089581	0	0	2	2	Complex	HET	UNK
MDA-PCa-2b	chr3	103513223	103513227	chr6	35904625	35904629	CALL_324	93455551	29964126	0	1	2	2	Complex	HET	UNK
MDA-PCa-2b	chr3	105059558	105059618	chr4	38198104	38198109	CALL_400	93455551	9487207	0	0	2	Unchained	Complex	HET	UNK
MDA-PCa-2b	chr4	38733351	38733356	chr6	39680725	39680730	CALL_329	9487207	39089581	0	0	2	Unchained	Complex	HET	UNK
RWPE-1	chr3	129763382	129763389	chr3	129806730	129806746	CALL_353	123922949	123922949	1	1	Unchained	Unchained	Simple	HET	DEL
RWPE-1	chr1	152555542	152555545	chr1	152587738	152587741	CALL_229	152309797	152309797	.	.	Unchained	Unchained	Simple	HOM	DEL
RWPE-1	chr20	1561096	1561114	chr20	1594230	1594248	CALL_282	19481	19481	0	0	Unchained	Unchained	Simple	HET	DEL
RWPE-1	chr22	24239146	24239148	chr22	24312001	24312003	CALL_522	24155604	24155604	0	0	Unchained	Unchained	Simple	HET	INV
RWPE-1	chr22	24341572	24341574	chr22	24398692	24398694	CALL_409	24155604	24155604	1	1	Unchained	Unchained	Simple	HET	DEL
RWPE-1	chr11	1915269	1915270	chr11	1961056	1961077	CALL_423	241965	241965	0	0	Unchained	Unchained	Simple	HET	INV
RWPE-1	chr6	32469614	32469630	chr6	32507915	32507927	CALL_465	26806204	26806204	0	0	Unchained	Unchained	Simple	HET	UNK
RWPE-1	chr2	34695831	34695846	chr2	34736566	34736568	CALL_345	28156640	28156640	1	1	Unchained	Unchained	Simple	HET	DEL
RWPE-1	chr21	47578879	47578896	chr21	47705211	47705228	CALL_453	33470577	33470577	1	1	Unchained	Unchained	Simple	HET	DUP
RWPE-1	chr14	41609253	41609272	chr14	41669684	41669705	CALL_421	35290406	35290406	0	0	Unchained	Unchained	Simple	HET	DEL
RWPE-1	chr8	39232071	39232087	chr8	39387207	39387224	CALL_480	37750678	37750678	1	1	Unchained	Unchained	Simple	HET	DEL
RWPE-1	chr1	56242688	56242691	chr1	56308874	56308875	CALL_407	52568324	52568324	0	0	Unchained	Unchained	Simple	HET	DEL
RWPE-1	chr11	55365428	55365446	chr11	55445874	55445889	CALL_456	54670351	54670351	0	0	Unchained	Unchained	Simple	HET	UNK
RWPE-1	chr10	4997023	4997032	chr10	5053855	5053870	CALL_457	61964	61964	1	1	Unchained	Unchained	Simple	HET	INV
RWPE-1	chr4	69435042	69435044	chr4	69536845	69536847	CALL_446	68286155	68286155	0	0	Unchained	Unchained	Simple	HET	DUP
RWPE-1	chr4	70123572	70123586	chr4	70232319	70232336	CALL_447	68286155	68286155	1	1	Unchained	Unchained	Simple	HET	DEL
RWPE-1	chr1	72766322	72766327	chr1	72811837	72811840	CALL_245	70389543	70389543	.	.	Unchained	Unchained	Simple	HOM	DEL
RWPE-1	chr9	81529673	81529691	chr9	93353404	93353422	CALL_418	73053578	92634812	1	1	Unchained	Unchained	Simple	HET	UNK
RWPE-1	chr16	80950737	80950753	chr16	80999219	80999235	CALL_393	74635831	74635831	0	0	Unchained	Unchained	Simple	HET	DEL
RWPE-1	chr11	85429836	85429848	chr11	85472185	85472201	CALL_349	83023377	83023377	1	1	Unchained	Unchained	Simple	HET	DEL
RWPE-1	chr12	17924265	17924267	chr12	18014022	18014024	CALL_512	8390963	8390963	.	.	Unchained	Unchained	Simple	HET	INV
LNCaP	chr10	96453397	96453402	chr6	160112763	160112768	CALL_335	95892135	158895715	0	0	Unchained	Unchained	Simple	HET	UNK
LNCaP	chr4	97998749	97998754	chr6	87535389	87535394	CALL_582	97690900	76624076	0	1	2	Unchained	Complex	HET	UNK
LNCaP	chr16	71968654	71968656	chr6	42172963	42172965	CALL_4453	48385290	32560364	1	0	Unchained	Unchained	Simple	HET	DISTAL
LNCaP	chr6	76422052	76422055	chr6	76646625	76646628	CALL_337	62153316	62153316	.	.	2	Unchained	Complex	HOM	DUP
LNCaP	chr14	38042391	38042396	chr7	7940775	7940780	CALL_350	20237448	6883832	0	0	4	Unchained	Complex	HET	UNK
LNCaP	chr14	37985628	37985633	chr7	14197899	14197904	CALL_371	20237448	6883832	0	0	4	Unchained	Complex	HET	UNK
LNCaP	chr1	86035494	86035498	chr15	77331492	77331496	CALL_417	83717281	75531526	.	.	Unchained	Unchained	Simple	HET	UNK
1 Unique SV identifier assigned by Long Ranger (PMID: 30894395)
2 Phase set number for breakpoint 1 and 2
3 Haplotype (0 or 1) for breakpoint 1 and 2. "."means unphased SV or hemi/homozygous SV
4 Unchained or chaineded (numbered) SV as called by ChainFinder (PMID: 23622249) or ChainLink. SVs of the same number in the same cell line were chained into one complex SV
5 as called by ChainLink
6 Type of SV. If the breakpoints are <500Kb apart, this will be one of DEL (deletion), INV (inversion), DUP (tandem duplication), or UNK (unknown type). All events with breakpoints >500Kb apart are marked as DISTAL.

## Sheet: Table S9
Table S9: SVs involved in the TMPRSS2-ERG rearrangements in VCaP
name1	chrom1	start1	stop1	chrom2	start2	stop2	HAPS2	PS13	PS23	ChainFinder4	ChainLink4	Zygosity
call_1066	chr17	73788383	73788387	chr21	40547306	40547310	1,1	67994445	27478328	Unchained	Chained	HET
call_1089	chr16	67145181	67145185	chr21	42853720	42853724	0,1	67047591	27478328	Chained	Chained	HET
call_1120	chr16	67707847	67707851	chr21	39876408	39876409	0,1	67674086	27478328	Chained	Chained	HET
call_1198	chr12	123456128	123456130	chr16	84746250	84746252	1,1	122951086	84059200	Unchained	Chained	HET
call_894	chr21	39876353	39876368	chr21	42858024	42858033	1,1	27478328	27478328	Chained	Chained	HET
call_953	chr12	123456484	123456488	chr21	40547371	40547375	1,1	122951086	27478328	Unchained	Chained	HET
1Unique SV call identifier assigned by Long Ranger
2Haplotypes of first and second breakpoints separated by a comma
3Phased set for first (PS1) and second (PS2) breakpoint
4Complex SV called by ChainFinder (PMID: 23622249) or ChainLink

## Sheet: Table S10
Table S10: List of SVs and genes interrupted by SVs in each cell line
Cell_line	Type1	chrom1	start1	stop1	Distant12	Position13	Gene14	chrom2	start2	stop2	Distant22	Position23	Gene24	Transcript15	Function16	Transcript25	Function26	name7	ChainLink8	Zygosity
LNCaP	DEL	chr12	7995916	7995918	0	Intron	SLC2A14	chr12	8127000	8127002	33108	Upstream	SLC2A3	NM_001286237.1	protein_coding	NM_006931.2	protein_coding	CALL_189	Unchained	HET
LNCaP	DEL	chr12	16339804	16339808	0	Downstream	SLC15A5	chr12	16392413	16392423	0	Intron	SLC15A5	NM_001170798.1	protein_coding	NM_001170798.1	protein_coding	CALL_112	Unchained	HET
LNCaP	INV	chr12	17922533	17922535	91205	Downstream	MIR3974	chr12	18012071	18012073	180743	Downstream	MIR3974	NR_039770.1	pseudogene	NR_039770.1	pseudogene	CALL_107	Unchained	HET
LNCaP	DEL	chr20	1561091	1561097	0	Intron	SIRPB1	chr20	1594146	1594159	0	Intron	SIRPB1	NM_001083910.3	protein_coding	NM_001135844.3	protein_coding	CALL_88	Unchained	HET
LNCaP	DEL	chr8	39232074	39232077	0	Intron	ADAM5	chr8	39387226	39387229	1718	Upstream	ADAM3A	NR_001448.1	pseudogene	NR_073423.1	pseudogene	CALL_20	Unchained	HOM
LNCaP	DEL	chr1	152555543	152555556	0	Upstream	LCE3D	chr1	152587726	152587741	0	Downstream	LCE3B	NM_032563.1	protein_coding	NM_178433.1	protein_coding	CALL_78	Unchained	HET
LNCaP	INV	chr11	1915264	1915265	0	Downstream	LSP1	chr11	1961050	1961069	0	Downstream	TNNT3	NM_001013254.1	protein_coding	NM_001042782.2	protein_coding	CALL_149	Unchained	HET
LNCaP	DEL	chr22	24340967	24340969	0	Intron	GSTTP1	chr22	24399039	24399041	0	Intron	GSTTP2	NR_003081.1	pseudogene	NR_003082.1	pseudogene	CALL_147	Unchained	HET
LNCaP	DEL	chr2	34695829	34695843	168016	Downstream	LINC01317	chr2	34736554	34736568	161064	Upstream	LINC01320	NR_126403.1	pseudogene	NR_126404.1	pseudogene	CALL_94	Unchained	HET
LNCaP	DEL	chr20	14886516	14886533	0	Intron	MACROD2	chr20	14937159	14937172	0	Intron	MACROD2	NM_080676.5	protein_coding	NM_080676.5	protein_coding	CALL_99	Unchained	HET
LNCaP	UNK	chr1	8463818	8463834	0	Intron	RERE	chr1	9756916	9756919	0	Intron	PIK3CD	NM_012102.3	protein_coding	NM_005026.3	protein_coding	CALL_237	1	HET
LNCaP	UNK	chr1	11432471	11432486	78980	Downstream	UBIAD1	chr1	26949337	26949347	42817	Downstream	RPS6KA1	NM_013319.2	protein_coding	NM_002953.3	protein_coding	CALL_185	1	HET
LNCaP	DEL	chr2	47677654	47677669	0	Intron	MSH2	chr2	47983362	47983373	21852	Upstream	MSH6	NM_000251.2	protein_coding	NM_001281493.1	protein_coding	CALL_197	Unchained	HET
LNCaP	UNK	chr5	57147384	57147399	33767	Downstream	LOC101928539	chr5	58351948	58351963	0	Intron	PDE4D	NR_109900.1	pseudogene	NM_001197219.1	protein_coding	CALL_225	Unchained	HET
LNCaP	DEL	chr4	69373785	69373800	5463	Downstream	TMPRSS11E	chr4	69491081	69491096	16227	Downstream	UGT2B15	NM_014058.3	protein_coding	NM_001076.3	protein_coding	CALL_134	2	HET
LNCaP	DEL	chr4	92288790	92288803	0	Intron	CCSER1	chr4	92426213	92426226	0	Intron	CCSER1	NM_001145065.1	protein_coding	NM_001145065.1	protein_coding	CALL_144	2	HET
LNCaP	DEL	chr1	72766324	72766339	13047	Upstream	NEGR1	chr1	72811825	72811840	58548	Upstream	NEGR1	NM_173808.2	protein_coding	NM_173808.2	protein_coding	CALL_98	Unchained	HET
LNCaP	DEL	chr14	86457725	86457738	0	Intron	LOC101928767	chr14	86489569	86489582	0	Intron	LOC101928767	NR_110155.1	pseudogene	NR_110155.1	pseudogene	CALL_87	Unchained	HET
LNCaP	DEL	chr10	90929194	90929196	31493	Downstream	CH25H	chr10	90973187	90973189	0	Downstream	LIPA	NM_003956.3	protein_coding	NM_001288979.1	protein_coding	CALL_186	Unchained	HET
LNCaP	DEL	chr3	129763382	129763397	32286	Upstream	ALG1L2	chr3	129806731	129806746	0	Intron	ALG1L2	NM_001136152.1	protein_coding	NM_001136152.1	protein_coding	CALL_18	3	HOM
LNCaP	INV	chr3	175104272	175104285	0	Intron	NAALADL2	chr3	175182689	175182706	0	Intron	NAALADL2	NM_207015.2	protein_coding	NM_207015.2	protein_coding	CALL_127	3	HET
LNCaP	DEL	chr3	175159742	175159758	0	Intron	NAALADL2	chr3	175227732	175227749	0	Intron	NAALADL2	NM_207015.2	protein_coding	NM_207015.2	protein_coding	CALL_224	3	HET
LNCaP	INV	chr3	175211025	175211026	0	Intron	NAALADL2	chr3	175257191	175257204	0	Intron	NAALADL2	NM_207015.2	protein_coding	NM_207015.2	protein_coding	CALL_100	3	HET
LNCaP	DEL	chr4	34779892	34779905	733377	Upstream	LOC101928622	chr4	34828934	34828944	782419	Upstream	LOC101928622	NR_125902.1	pseudogene	NR_125902.1	pseudogene	CALL_108	Unchained	HET
LNCaP_Abl	DEL	chr10	104257516	104257520	0	Intron	ACTR1A	chr10	104494896	104494897	0	Intron	SFXN2	NM_005736.3	protein_coding	NM_178858.4	protein_coding	CALL_545	Unchained	HET
LNCaP_Abl	DUP	chr1	110813423	110813426	10569	Downstream	LOC440600	chr1	110945276	110945279	0	Intron	LAMTOR5	NR_036595.1	pseudogene	NM_006402.2	protein_coding	CALL_490	Unchained	HET
LNCaP_Abl	DUP	chr6	109142642	109142645	21970	Upstream	ARMC2	chr6	109287604	109287607	0	Intron	ARMC2	NM_001286609.1	protein_coding	NM_001286609.1	protein_coding	CALL_499	Unchained	HET
LNCaP_Abl	DEL	chr20	1561080	1561089	0	Intron	SIRPB1	chr20	1594170	1594178	0	Intron	SIRPB1	NM_001083910.3	protein_coding	NM_001135844.3	protein_coding	CALL_118	1	HOM
LNCaP_Abl	DEL	chr20	14886512	14886525	0	Intron	MACROD2	chr20	14937159	14937172	0	Intron	MACROD2	NM_080676.5	protein_coding	NM_080676.5	protein_coding	CALL_280	1	HET
LNCaP_Abl	DEL	chr20	15451223	15451233	0	Intron	MACROD2	chr20	15585802	15585815	0	Intron	MACROD2	NM_001033087.1	protein_coding	NM_001033087.1	protein_coding	CALL_547	1	HET
LNCaP_Abl	UNK	chr20	16781763	16781777	43954	Downstream	OTOR	chr20	18240162	18240178	23758	Upstream	ZNF133	NM_020157.3	protein_coding	NM_003434.5	protein_coding	CALL_510	1	HET
LNCaP_Abl	DUP	chr2	129549871	129549875	67296	Upstream	LOC101927881	chr2	129661671	129661674	30370	Downstream	LOC101927881	NR_110278.1	pseudogene	NR_110278.1	pseudogene	CALL_519	Unchained	HET
LNCaP_Abl	DEL	chr4	151199518	151199519	0	Intron	LRBA	chr4	151345504	151345505	0	Intron	LRBA	NM_001199282.2	protein_coding	NM_001199282.2	protein_coding	CALL_560	Unchained	HET
LNCaP_Abl	DEL	chr12	2911292	2911307	0	Intron	FKBP4	chr12	3097628	3097643	0	Intron	TEAD4	NM_002014.3	protein_coding	NM_201441.2	protein_coding	CALL_546	2	HET
LNCaP_Abl	DEL	chr12	7995744	7995746	0	Intron	SLC2A14	chr12	8126007	8126009	32115	Upstream	SLC2A3	NM_001286237.1	protein_coding	NM_006931.2	protein_coding	CALL_451	2	HET
LNCaP_Abl	DEL	chr1	152555550	152555563	0	Upstream	LCE3D	chr1	152587731	152587741	0	Downstream	LCE3B	NM_032563.1	protein_coding	NM_178433.1	protein_coding	CALL_184	Unchained	HET
LNCaP_Abl	DUP	chr1	16146015	16146034	6821	Upstream	UQCRHL	chr1	16215765	16215785	0	Intron	SPEN	NM_001089591.1	protein_coding	NM_015001.2	protein_coding	CALL_564	Unchained	HET
LNCaP_Abl	DUP	chr2	188554456	188554466	130224	Upstream	TFPI	chr2	188630315	188630327	206083	Upstream	TFPI	NM_001329241.1	protein_coding	NM_001329241.1	protein_coding	CALL_390	Unchained	HET
LNCaP_Abl	DEL	chr2	189113520	189113523	0	Intron	LINC01090	chr2	189418134	189418135	0	Intron	GULP1	NR_126396.1	pseudogene	NR_045563.1	protein_coding	CALL_571	3	HET
LNCaP_Abl	DUP	chr2	203303589	203303590	0	Intron	BMPR2	chr2	203554499	203554502	0	Intron	FAM117B	NM_001204.6	protein_coding	NM_173511.3	protein_coding	CALL_357	3	HOM
LNCaP_Abl	DUP	chr2	205635053	205635055	0	Intron	PARD3B	chr2	205857856	205857858	0	Intron	PARD3B	NM_152526.5	protein_coding	NM_152526.5	protein_coding	CALL_523	3	HOM
LNCaP_Abl	DUP	chr2	218885614	218885617	9036	Upstream	RUFY4	chr2	219019984	219019987	2577	Downstream	CXCR1	NR_034176.1	pseudogene	NM_000634.2	protein_coding	CALL_399	3	HOM
LNCaP_Abl	UNK	chr2	220049737	220049753	0	Exon	FAM134A	chr2	222435543	222435559	0	Intron	EPHA4	NM_024293.5	protein_coding	NM_004438.4	protein_coding	CALL_553	3	HET
LNCaP_Abl	UNK	chr2	220110075	220110089	0	Upstream	GLB1L	chr2	222669235	222669249	225313	Upstream	EPHA4	NM_001286427.1	protein_coding	NM_001304536.1	protein_coding	CALL_496	3	HET
LNCaP_Abl	DUP	chr2	229067438	229067440	16077	Upstream	SPHKAP	chr2	229288862	229288864	237501	Upstream	SPHKAP	NM_001142644.1	protein_coding	NM_001142644.1	protein_coding	CALL_488	3	HOM
LNCaP_Abl	UNK	chr14	37985628	37985633	0	Intron	MIPOL1	chr7	14197899	14197904	0	Intron	DGKB	NM_001195297.1	protein_coding	NM_004080.2	protein_coding	CALL_371	4	HET
LNCaP_Abl	UNK	chr14	38042391	38042396	11359	Downstream	FOXA1	chr7	7940775	7940780	16924	Downstream	UMAD1	NM_004496.3	protein_coding	NM_001302350.1	protein_coding	CALL_350	4	HET
LNCaP_Abl	UNK	chr14	44918921	44918936	49426	Downstream	FSCB	chr14	45568990	45569005	0	Intron	PRPF39	NM_032135.3	protein_coding	NM_017922.3	protein_coding	CALL_521	4	HOM
LNCaP_Abl	DEL	chr14	86457724	86457727	0	Intron	LOC101928767	chr14	86489583	86489586	0	Intron	LOC101928767	NR_110155.1	pseudogene	NR_110155.1	pseudogene	CALL_233	Unchained	HET
LNCaP_Abl	DUP	chr11	4710758	4710775	0	Intron	OR51E2	chr11	4802218	4802234	6071	Upstream	OR51F1	NM_030774.3	protein_coding	NM_001004752.1	protein_coding	CALL_400	5	HET
LNCaP_Abl	DEL	chr11	10125869	10125885	0	Intron	SBF2	chr11	10300134	10300144	0	Intron	SBF2	NM_030962.3	protein_coding	NM_030962.3	protein_coding	CALL_401	5	HET
LNCaP_Abl	DEL	chr16	22340054	22340055	0	Intron	POLR3E	chr16	22415372	22415373	0	Intron	MFSD13B	NM_001258033.1	protein_coding	NR_136333.1	pseudogene	CALL_495	Unchained	HET
LNCaP_Abl	INV	chr11	1915271	1915272	0	Downstream	LSP1	chr11	1961076	1961077	0	Downstream	TNNT3	NM_001013254.1	protein_coding	NM_001042782.2	protein_coding	CALL_324	Unchained	HET
LNCaP_Abl	DEL	chr8	39232074	39232077	0	Intron	ADAM5	chr8	39387226	39387229	1718	Upstream	ADAM3A	NR_001448.1	pseudogene	NR_073423.1	pseudogene	CALL_136	Unchained	HOM
LNCaP_Abl	UNK	chr6	32440324	32440335	22498	Downstream	HLA-DRA	chr6	32497110	32497123	0	Intron	HLA-DRB5	NM_019111.4.6	protein_coding	NM_002125.3	protein_coding	CALL_305	6	HET
LNCaP_Abl	UNK	chr6	32490656	32490657	0	Intron	HLA-DRB5	chr6	32526773	32526774	0	Intron	HLA-DRB6	NM_002125.3	protein_coding	NR_001298.1	pseudogene	CALL_355	6	HET
LNCaP_Abl	DUP	chr22	29604611	29604625	0	Intron	EMID1	chr22	29815861	29815875	12136	Downstream	RFPL1S	NM_133455.3	protein_coding	NR_002727.2	pseudogene	CALL_535	Unchained	HOM
LNCaP_Abl	DEL	chr2	34695829	34695842	168016	Downstream	LINC01317	chr2	34736557	34736568	161060	Upstream	LINC01320	NR_126403.1	pseudogene	NR_126404.1	pseudogene	CALL_279	Unchained	HET
LNCaP_Abl	UNK	chr2	38442945	38442960	28952	Downstream	CYP1B1-AS1	chr2	75063935	75063950	0	Intron	HK2	NR_027252.1	pseudogene	NM_000189.4	protein_coding	CALL_406	Unchained	HET
LNCaP_Abl	DUP	chr20	39851330	39851333	0	Intron	ZHX3	chr20	40016373	40016376	9363	Downstream	CHD6	NM_015035.3	protein_coding	NM_032221.4	protein_coding	CALL_548	Unchained	HET
LNCaP_Abl	DEL	chr1	72766324	72766339	13047	Upstream	NEGR1	chr1	72811856	72811871	58579	Upstream	NEGR1	NM_173808.2	protein_coding	NM_173808.2	protein_coding	CALL_234	Unchained	HET
LNCaP_Abl	DUP	chr4	42089111	42089114	0	Exon	SLC30A9	chr4	42216857	42216858	56962	Upstream	BEND4	NM_006345.3	protein_coding	NM_001159547.1	protein_coding	CALL_505	Unchained	HET
LNCaP_Abl	UNK	chr1	8427812	8427827	0	Intron	RERE	chr1	11429037	11429052	75546	Downstream	UBIAD1	NM_012102.3	protein_coding	NM_013319.2	protein_coding	CALL_512	7	HET
LNCaP_Abl	UNK	chr1	8463839	8463856	0	Intron	RERE	chr1	9756902	9756919	0	Intron	PIK3CD	NM_012102.3	protein_coding	NM_005026.3	protein_coding	CALL_500	7	HET
LNCaP_Abl	UNK	chr1	9754619	9754633	0	Intron	PIK3CD	chr1	12168300	12168314	0	Intron	TNFRSF8	NM_005026.3	protein_coding	NM_001243.4	protein_coding	CALL_440	7	HET
LNCaP_Abl	UNK	chr1	10773901	10773917	0	Intron	CASZ1	chr1	15070794	15070810	0	Intron	KAZN	NM_001079843.2	protein_coding	NM_201628.2	protein_coding	CALL_461	7	HET
LNCaP_Abl	UNK	chr1	11432445	11432460	78954	Downstream	UBIAD1	chr1	26949349	26949353	42829	Downstream	RPS6KA1	NM_013319.2	protein_coding	NM_002953.3	protein_coding	CALL_462	7	HET
LNCaP_Abl	UNK	chr19	41223728	41223745	0	Upstream	COQ8B	chr19	49636920	49636937	0	Intron	PPFIA3	NM_001142555.2	protein_coding	NR_103842.1	protein_coding	CALL_427	Unchained	HET
LNCaP_Abl	DEL	chr2	46172809	46172825	0	Intron	PRKCE	chr2	46288013	46288029	0	Intron	PRKCE	NM_005400.2	protein_coding	NM_005400.2	protein_coding	CALL_530	Unchained	HET
LNCaP_Abl	DUP	chr17	49492522	49492539	67590	Downstream	LOC440446	chr17	49564461	49564480	138206	Downstream	CA10	NR_122104.1	pseudogene	NM_001082534.1	protein_coding	CALL_379	Unchained	HET
LNCaP_Abl	DEL	chr2	47677653	47677668	0	Intron	MSH2	chr2	47983411	47983424	21803	Upstream	MSH6	NM_000251.2	protein_coding	NM_001281493.1	protein_coding	CALL_295	Unchained	HOM
LNCaP_Abl	UNK	chr5	57147390	57147398	33761	Downstream	LOC101928539	chr5	58351949	58351956	0	Intron	PDE4D	NR_109900.1	pseudogene	NM_001197219.1	protein_coding	CALL_454	Unchained	HET
LNCaP_Abl	UNK	chr10	86115758	86115772	0	Intron	CCSER2	chr10	96581448	96581462	0	Intron	CYP2C19	NM_001284241.1	protein_coding	NM_000769.2	protein_coding	CALL_492	8	HET
LNCaP_Abl	UNK	chr10	86232016	86232030	0	Intron	CCSER2	chr10	96195516	96195530	0	Intron	TBC1D12	NM_001284240.1	protein_coding	NM_015188.1	protein_coding	CALL_493	8	HET
LNCaP_Abl	DUP	chr3	61155403	61155406	0	Intron	FHIT	chr3	61456145	61456148	86091	Upstream	PTPRG	NM_001320900.1	protein_coding	NM_002841.3	protein_coding	CALL_497	Unchained	HOM
LNCaP_Abl	DEL	chr3	56124897	56124898	0	Intron	ERC2	chr3	56163403	56163404	0	Intron	ERC2	NR_132749.1	protein_coding	NR_132749.1	protein_coding	CALL_354	Unchained	HET
LNCaP_Abl	DUP	chr11	62579390	62579395	0	Intron	STX5	chr11	62707799	62707802	13787	Upstream	CHRM1	NM_003164.4	protein_coding	NM_000738.2	protein_coding	CALL_528	Unchained	HET
LNCaP_Abl	DUP	chr6	76422052	76422055	0	Intron	SENP6	chr6	76646625	76646628	0	Intron	IMPG1	NM_001100409.2	protein_coding	NM_001282368.1	protein_coding	CALL_337	9	HOM
LNCaP_Abl	DUP	chr7	70319988	70319989	56934	Downstream	AUTS2	chr7	70365078	70365079	102024	Downstream	AUTS2	NM_001127231.2	protein_coding	NM_001127231.2	protein_coding	CALL_482	Unchained	HET
LNCaP_Abl	DEL	chr4	69373771	69373786	5449	Downstream	TMPRSS11E	chr4	69491157	69491168	16151	Downstream	UGT2B15	NM_014058.3	protein_coding	NM_001076.3	protein_coding	CALL_382	Unchained	HET
LNCaP_Abl	DISTAL	chr7	7940214	7940216	16363	Downstream	UMAD1	chr7	14198669	14198671	0	Intron	DGKB	NM_001302350.1	protein_coding	NM_004080.2	protein_coding	CALL_561	4	HET
LNCaP_Abl	UNK	chr16	72109716	72109717	0	Intron	HPR	chr6	42175467	42175471	0	Exon	MRPS10	NM_020995.3	protein_coding	NM_018141.3	protein_coding	CALL_479	Unchained	HET
LNCaP_Abl	DEL	chr5	78726645	78726660	0	Intron	HOMER1	chr5	78799065	78799080	0	Intron	HOMER1	NM_001277078.1	protein_coding	NM_001277078.1	protein_coding	CALL_360	13	HET
LNCaP_Abl	DUP	chr5	85063843	85063857	509412	Upstream	NBPF22P	chr5	85337828	85337830	235427	Upstream	NBPF22P	NR_003719.2	pseudogene	NR_003719.2	pseudogene	CALL_473	13	HOM
LNCaP_Abl	DEL	chr9	72910249	72910264	0	Intron	SMC5	chr9	72963464	72963480	0	Intron	SMC5	NM_015110.3	protein_coding	NM_015110.3	protein_coding	CALL_455	Unchained	HET
LNCaP_Abl	DUP	chr4	1662912	1662925	0	Intron	FAM53A	chr4	1750720	1750731	0	Downstream	TACC3	NM_001013622.3	protein_coding	NM_006342.2	protein_coding	CALL_359	Unchained	HET
LNCaP_Abl	DEL	chr16	85623053	85623056	16969	Upstream	GSE1	chr16	85696702	85696703	0	Intron	GSE1	NM_001134473.2	protein_coding	NM_001134473.2	protein_coding	CALL_518	Unchained	HET
LNCaP_Abl	UNK	chr1	86035494	86035498	0	Intron	DDAH1	chr15	77331492	77331496	0	Downstream	TSPAN3	NM_001134445.1	protein_coding	NM_001168412.1	protein_coding	CALL_417	Unchained	HET
LNCaP_Abl	DEL	chr8	87292187	87292190	44583	Upstream	SLC7A13	chr8	87426228	87426231	0	Intron	WWP1	NM_138817.2	protein_coding	NM_007013.3	protein_coding	CALL_446	14	HET
LNCaP_Abl	DUP	chr8	127885697	127885706	134695	Upstream	PCAT1	chr8	128249985	128249996	1890	Upstream	CASC21	NR_045262.1	pseudogene	NR_117099.1	pseudogene	CALL_544	14	HOM
LNCaP_Abl	DEL	chr18	9191639	9191654	0	Intron	ANKRD12	chr18	9297075	9297090	6092	Downstream	ANKRD12	NM_015208.4	protein_coding	NM_015208.4	protein_coding	CALL_567	Unchained	HET
LNCaP_Abl	DEL	chr4	92288790	92288806	0	Intron	CCSER1	chr4	92426232	92426248	0	Intron	CCSER1	NM_001145065.1	protein_coding	NM_001145065.1	protein_coding	CALL_373	9	HET
LNCaP_Abl	UNK	chr4	97998752	97998753	284318	Upstream	STPG2-AS1	chr6	87535389	87535390	106628	Upstream	HTR1E	NR_102713.1	pseudogene	NM_000865.2	protein_coding	CALL_445	9	HET
LNCaP_Abl	UNK	chr4	100505693	100505706	0	Intron	MTTP	chr4	102127380	102127389	0	Intron	PPP3CA	NM_000253.3	protein_coding	NM_001130691.1	protein_coding	CALL_404	Unchained	HET
LNCaP_Abl	DUP	chr4	111086178	111086181	0	Intron	ELOVL6	chr4	111171697	111171700	46877	Upstream	ELOVL6	NM_001130721.1	protein_coding	NM_024090.2	protein_coding	CALL_472	9	HET
LNCaP_Abl	INV	chr4	9457094	9457096	0	Downstream	DEFB131	chr4	9511856	9511858	40926	Downstream	MIR548I2	NM_001040448.2	protein_coding	NR_031688.1	pseudogene	CALL_572	10	HET
LNCaP_Abl	DEL	chr4	34779955	34779968	733440	Upstream	LOC101928622	chr4	34828935	34828943	782420	Upstream	LOC101928622	NR_125902.1	pseudogene	NR_125902.1	pseudogene	CALL_339	10	HET
LNCaP_Abl	DEL	chr3	129763383	129763396	32284	Upstream	ALG1L2	chr3	129806735	129806746	0	Intron	ALG1L2	NM_001136152.1	protein_coding	NM_001136152.1	protein_coding	CALL_116	11	HOM
LNCaP_Abl	DEL	chr3	174781864	174781866	0	Intron	NAALADL2	chr3	174901447	174901449	0	Intron	NAALADL2	NM_207015.2	protein_coding	NM_207015.2	protein_coding	CALL_562	11	HET
LNCaP_Abl	INV	chr3	175104282	175104283	0	Intron	NAALADL2	chr3	175182693	175182694	0	Intron	NAALADL2	NM_207015.2	protein_coding	NM_207015.2	protein_coding	CALL_296	11	HET
LNCaP_Abl	DEL	chr3	175159745	175159746	0	Intron	NAALADL2	chr3	175227733	175227749	0	Intron	NAALADL2	NM_207015.2	protein_coding	NM_207015.2	protein_coding	CALL_536	11	HET
LNCaP_Abl	INV	chr3	175211032	175211044	0	Intron	NAALADL2	chr3	175257192	175257207	0	Intron	NAALADL2	NM_207015.2	protein_coding	NM_207015.2	protein_coding	CALL_381	11	HET
LNCaP_Abl	DUP	chrX	11133218	11133232	0	Intron	HCCS	chrX	11235822	11235836	0	Intron	ARHGAP6	NM_005333.4	protein_coding	NM_001287242.1	protein_coding	CALL_551	Unchained	HET
LNCaP_Abl	DISTAL	chr5	103290028	103290030	386526	Upstream	NUDT12	chr5	105934895	105934897	210996	Downstream	LOC102467213	NM_001300741.1	protein_coding	NR_104671.1	pseudogene	CALL_580	12	HET
LNCaP_Abl	UNK	chr5	103431201	103431202	527699	Upstream	NUDT12	chr5	105919918	105919932	225973	Downstream	LOC102467213	NM_001300741.1	protein_coding	NR_104671.1	pseudogene	CALL_537	12	HET
LNCaP_Abl	DEL	chr12	16339803	16339806	0	Downstream	SLC15A5	chr12	16392426	16392429	0	Intron	SLC15A5	NM_001170798.1	protein_coding	NM_001170798.1	protein_coding	CALL_266	Unchained	HET
LNCaP_Abl	INV	chr12	17924034	17924036	92706	Downstream	MIR3974	chr12	18013137	18013139	181809	Downstream	MIR3974	NR_039770.1	pseudogene	NR_039770.1	pseudogene	CALL_220	Unchained	HET
LNCaP_Abl	DUP	chr12	20023819	20023822	138793	Upstream	LOC100506393	chr12	20266451	20266456	9649	Downstream	LOC100506393	NR_040098.1	pseudogene	NR_040098.1	pseudogene	CALL_469	Unchained	HOM
LNCaP_Abl	UNK	chr10	96453397	96453402	0	Intron	CYP2C18	chr6	160112763	160112768	0	Exon	SOD2	NM_000772.2	protein_coding	NM_001322816.1	protein_coding	CALL_376	Unchained	HET
LNCaP_C42b	UNK	chr8	102298953	102298998	75661	Upstream	ZNF706	chr8	102454583	102454682	45078	Upstream	GRHL2	NM_001267709.1	protein_coding	NM_024915.3	protein_coding	CALL_466	Unchained	HOM
LNCaP_C42b	DUP	chr16	11611403	11611406	25168	Downstream	LITAF	chr16	11981935	11981938	0	Intron	GSPT1	NR_024320.1	protein_coding	NM_002094.3	protein_coding	CALL_470	Unchained	HOM
LNCaP_C42b	DEL	chr20	1561100	1561115	0	Intron	SIRPB1	chr20	1594150	1594165	0	Intron	SIRPB1	NM_001083910.3	protein_coding	NM_001135844.3	protein_coding	CALL_148	Unchained	HOM
LNCaP_C42b	DEL	chr20	14886510	14886513	0	Intron	MACROD2	chr20	14937172	14937175	0	Intron	MACROD2	NM_080676.5	protein_coding	NM_080676.5	protein_coding	CALL_462	Unchained	HET
LNCaP_C42b	UNK	chr20	15017885	15017900	0	Intron	MACROD2	chr20	15543776	15543791	0	Intron	MACROD2	NM_080676.5	protein_coding	NM_001033087.1	protein_coding	CALL_636	Unchained	HET
LNCaP_C42b	UNK	chr11	119226078	119226083	0	Exon	USP2	chr22	39843848	39843853	4470	Upstream	MGAT3	NM_001243759.1	protein_coding	NM_002409.4	protein_coding	CALL_628	1	HET
LNCaP_C42b	DEL	chr8	39232075	39232090	0	Intron	ADAM5	chr8	39387227	39387229	1719	Upstream	ADAM3A	NR_001448.1	pseudogene	NR_073423.1	pseudogene	CALL_152	Unchained	HOM
LNCaP_C42b	UNK	chr4	150738555	150738628	255864	Upstream	DCLK2	chr4	150773111	150773582	221308	Upstream	DCLK2	NM_001040260.3	protein_coding	NM_001040260.3	protein_coding	CALL_422	2	HET
LNCaP_C42b	DUP	chr4	169711106	169711122	0	Intron	PALLD	chr4	169818088	169818104	0	Intron	PALLD	NM_016081.3	protein_coding	NM_016081.3	protein_coding	CALL_519	2	HOM
LNCaP_C42b	DUP	chr21	17235103	17235119	0	Intron	USP25	chr21	17726101	17726117	0	Intron	MIR99AHG	NM_001283041.1	protein_coding	NR_136551.1	pseudogene	CALL_621	3	HOM
LNCaP_C42b	UNK	chr21	44856265	44856270	4257	Upstream	LOC102724428	chr6	51375662	51375667	99476	Downstream	PKHD1	NM_001320643.1	protein_coding	NM_138694.3	protein_coding	CALL_525	3	HET
LNCaP_C42b	DEL	chr1	152555542	152555558	0	Upstream	LCE3D	chr1	152587735	152587745	0	Downstream	LCE3B	NM_032563.1	protein_coding	NM_178433.1	protein_coding	CALL_311	Unchained	HET
LNCaP_C42b	UNK	chr2	153187972	153187989	0	Upstream	FMNL2	chr2	153344024	153344040	0	Intron	FMNL2	NM_052905.3	protein_coding	NM_052905.3	protein_coding	CALL_611	Unchained	HET
LNCaP_C42b	DUP	chr3	173956110	173956131	0	Intron	NLGN1	chr3	174170810	174170829	164671	Downstream	NLGN1	NM_014932.3	protein_coding	NM_014932.3	protein_coding	CALL_604	4	HOM
LNCaP_C42b	INV	chr3	175104270	175104287	0	Intron	NAALADL2	chr3	175182692	175182702	0	Intron	NAALADL2	NM_207015.2	protein_coding	NM_207015.2	protein_coding	CALL_337	4	HET
LNCaP_C42b	INV	chr3	175211024	175211041	0	Intron	NAALADL2	chr3	175257193	175257204	0	Intron	NAALADL2	NM_207015.2	protein_coding	NM_207015.2	protein_coding	CALL_390	4	HET
LNCaP_C42b	INV	chr11	1915270	1915271	0	Downstream	LSP1	chr11	1961045	1961063	0	Downstream	TNNT3	NM_001013254.1	protein_coding	NM_001042782.2	protein_coding	CALL_394	5	HET
LNCaP_C42b	UNK	chr11	14207794	14207809	0	Intron	SPON1	chr11	17411704	17411719	0	Upstream	KCNJ11	NM_006108.3	protein_coding	NM_000525.3	protein_coding	CALL_515	5	HET
LNCaP_C42b	UNK	chr11	14284267	14284286	0	Exon	SPON1	chr11	17841182	17841201	0	Intron	SERGEF	NM_006108.3	protein_coding	NR_104041.1	protein_coding	CALL_619	5	HET
LNCaP_C42b	DUP	chr2	203303587	203303590	0	Intron	BMPR2	chr2	203554499	203554502	0	Intron	FAM117B	NM_001204.6	protein_coding	NM_173511.3	protein_coding	CALL_239	Unchained	HOM
LNCaP_C42b	DEL	chr12	7995841	7995843	0	Intron	SLC2A14	chr12	8125068	8125070	31176	Upstream	SLC2A3	NM_001286237.1	protein_coding	NM_006931.2	protein_coding	CALL_378	6	HET
LNCaP_C42b	DEL	chr12	16339803	16339818	0	Downstream	SLC15A5	chr12	16392417	16392429	0	Intron	SLC15A5	NM_001170798.1	protein_coding	NM_001170798.1	protein_coding	CALL_267	6	HET
LNCaP_C42b	INV	chr12	17923198	17923200	91870	Downstream	MIR3974	chr12	18013039	18013041	181711	Downstream	MIR3974	NR_039770.1	pseudogene	NR_039770.1	pseudogene	CALL_237	6	HET
LNCaP_C42b	UNK	chr13	21539272	21539290	2897	Downstream	LATS2	chr13	23138689	23138706	283030	Downstream	LINC00540	NM_014572.2	protein_coding	NR_103810.1	pseudogene	CALL_516	7	HET
LNCaP_C42b	DISTAL	chr13	21539289	21539291	2880	Downstream	LATS2	chr13	28824440	28824442	0	Intron	PAN3	NM_014572.2	protein_coding	NM_175854.7	protein_coding	CALL_483	7	HET
LNCaP_C42b	UNK	chr13	22012596	22012613	0	Intron	ZDHHC20	chr13	84250295	84250312	196038	Downstream	SLITRK1	NM_001330059.1	protein_coding	NM_052910.2	protein_coding	CALL_384	7	HET
LNCaP_C42b	UNK	chr13	22060491	22060492	1330	Downstream	MICU2	chr13	93751989	93751999	36810	Downstream	LINC00363	NM_152726.2	protein_coding	NR_126360.1	pseudogene	CALL_421	7	HET
LNCaP_C42b	UNK	chr13	23147832	23147849	292173	Downstream	LINC00540	chr13	28824380	28824381	0	Intron	PAN3	NR_103810.1	pseudogene	NM_175854.7	protein_coding	CALL_601	7	HET
LNCaP_C42b	UNK	chr13	24119943	24119956	19559	Upstream	TNFRSF19	chr13	84325576	84325586	120757	Downstream	SLITRK1	NM_001204459.1	protein_coding	NM_052910.2	protein_coding	CALL_379	7	HET
LNCaP_C42b	UNK	chr13	24340498	24340506	0	Intron	MIPEP	chr13	32652215	32652231	0	Intron	FRY	NM_005932.3	protein_coding	NM_023037.2	protein_coding	CALL_461	7	HET
LNCaP_C42b	UNK	chr13	32883352	32883366	0	Intron	ZAR1L	chr13	94016767	94016783	0	Intron	GPC6	NM_001136571.1	protein_coding	NM_005708.3	protein_coding	CALL_426	7	HET
LNCaP_C42b	DISTAL	chr13	35098760	35098762	0	Intron	LINC00457	chr13	38867820	38867822	51081	Upstream	UFM1	NR_047036.1	pseudogene	NM_001286706.1	protein_coding	CALL_583	7	HET
LNCaP_C42b	UNK	chr13	35146995	35147012	0	Intron	LINC00457	chr13	90264013	90264029	42346	Upstream	LINC00353	NR_047036.1	pseudogene	NR_046991.1	pseudogene	CALL_434	7	HET
LNCaP_C42b	UNK	chr13	35462608	35462619	48809	Upstream	NBEA	chr13	37950811	37950828	99783	Downstream	LINC01048	NM_015678.4	protein_coding	NR_125762.1	pseudogene	CALL_507	7	HET
LNCaP_C42b	UNK	chr13	35484357	35484374	27060	Upstream	NBEA	chr13	90603236	90603255	104258	Downstream	LINC00559	NM_015678.4	protein_coding	NR_047489.1	pseudogene	CALL_449	7	HET
LNCaP_C42b	DISTAL	chr13	37950828	37950830	99766	Downstream	LINC01048	chr13	90603158	90603160	104336	Downstream	LINC00559	NR_125762.1	pseudogene	NR_047489.1	pseudogene	CALL_523	7	HET
LNCaP_C42b	INV	chr13	38943725	38943735	1581	Downstream	UFM1	chr13	39030573	39030586	70557	Downstream	LINC00437	NM_001286706.1	protein_coding	NR_126377.1	pseudogene	CALL_517	7	HET
LNCaP_C42b	UNK	chr13	68139512	68139528	180386	Downstream	LINC00364	chr13	75984607	75984623	0	Intron	TBC1D4	NR_130792.1	pseudogene	NM_001286658.2	protein_coding	CALL_345	7	HET
LNCaP_C42b	DEL	chr1	246456523	246456531	0	Intron	SMYD3	chr1	246506225	246506239	0	Intron	SMYD3	NM_022743.2	protein_coding	NM_022743.2	protein_coding	CALL_505	Unchained	HET
LNCaP_C42b	DUP	chr14	30057119	30057136	0	Intron	PRKD1	chr14	30205847	30205866	0	Intron	PRKD1	NM_002742.2	protein_coding	NM_002742.2	protein_coding	CALL_484	8	HOM
LNCaP_C42b	DUP	chr14	30297303	30297304	0	Intron	PRKD1	chr14	30505999	30506002	104051	Upstream	PRKD1	NM_002742.2	protein_coding	NM_001330069.1	protein_coding	CALL_307	8	HOM
LNCaP_C42b	UNK	chr14	37985633	37985634	0	Intron	MIPOL1	chr7	14197901	14197906	0	Intron	DGKB	NM_001195297.1	protein_coding	NM_004080.2	protein_coding	CALL_548	8	HET
LNCaP_C42b	UNK	chr14	38042391	38042396	11359	Downstream	FOXA1	chr7	7940776	7940780	16925	Downstream	UMAD1	NM_004496.3	protein_coding	NM_001302350.1	protein_coding	CALL_524	8	HET
LNCaP_C42b	UNK	chr20	42126967	42126981	4346	Upstream	L3MBTL1	chr20	42549305	42549319	0	Intron	TOX2	NM_032107.4	protein_coding	NM_032883.2	protein_coding	CALL_587	Unchained	HOM
LNCaP_C42b	DEL	chr6	32440891	32440901	23065	Downstream	HLA-DRA	chr6	32497524	32497525	0	Intron	HLA-DRB5	NM_019111.4.6	protein_coding	NM_002125.3	protein_coding	CALL_563	Unchained	HET
LNCaP_C42b	DUP	chr22	38682055	38682056	0	Downstream	LOC400927-CSNK1E	chr22	38918459	38918460	0	Intron	DMC1	NM_001289912.1	protein_coding	NM_007068.3	protein_coding	CALL_459	1	HOM
LNCaP_C42b	UNK	chr1	8427812	8427823	0	Intron	RERE	chr1	11429040	11429051	75549	Downstream	UBIAD1	NM_012102.3	protein_coding	NM_013319.2	protein_coding	CALL_564	9	HET
LNCaP_C42b	UNK	chr1	8463817	8463834	0	Intron	RERE	chr1	9756902	9756919	0	Intron	PIK3CD	NM_012102.3	protein_coding	NM_005026.3	protein_coding	CALL_382	9	HET
LNCaP_C42b	DUP	chr1	8834228	8834230	0	Intron	RERE	chr1	9154721	9154723	4748	Downstream	GPR157	NM_012102.3	protein_coding	NM_024980.4	protein_coding	CALL_617	9	HOM
LNCaP_C42b	UNK	chr1	9754618	9754633	0	Intron	PIK3CD	chr1	12168299	12168314	0	Intron	TNFRSF8	NM_005026.3	protein_coding	NM_001243.4	protein_coding	CALL_361	9	HET
LNCaP_C42b	UNK	chr1	10741847	10741851	0	Intron	CASZ1	chr1	12155705	12155721	0	Intron	TNFRSF8	NM_001079843.2	protein_coding	NM_001243.4	protein_coding	CALL_460	9	HET
LNCaP_C42b	UNK	chr1	10773881	10773892	0	Intron	CASZ1	chr1	15070797	15070810	0	Intron	KAZN	NM_001079843.2	protein_coding	NM_201628.2	protein_coding	CALL_336	9	HET
LNCaP_C42b	UNK	chr1	11432459	11432502	78968	Downstream	UBIAD1	chr1	26949343	26949352	42823	Downstream	RPS6KA1	NM_013319.2	protein_coding	NM_002953.3	protein_coding	CALL_480	9	HET
LNCaP_C42b	UNK	chr19	41223728	41223744	0	Upstream	COQ8B	chr19	49636781	49636797	0	Intron	PPFIA3	NM_001142555.2	protein_coding	NR_103842.1	protein_coding	CALL_487	Unchained	HET
LNCaP_C42b	DEL	chr1	72766324	72766327	13047	Upstream	NEGR1	chr1	72811837	72811838	58560	Upstream	NEGR1	NM_173808.2	protein_coding	NM_173808.2	protein_coding	CALL_296	Unchained	HET
LNCaP_C42b	DUP	chr17	49492520	49492531	67588	Downstream	LOC440446	chr17	49564463	49564472	138204	Downstream	CA10	NR_122104.1	pseudogene	NM_001082534.1	protein_coding	CALL_492	Unchained	HET
LNCaP_C42b	DEL	chr2	47677653	47677666	0	Intron	MSH2	chr2	47983364	47983377	21850	Upstream	MSH6	NM_000251.2	protein_coding	NM_001281493.1	protein_coding	CALL_280	Unchained	HOM
LNCaP_C42b	DUP	chr8	53805876	53805886	41585	Upstream	NPBWR1	chr8	53988964	53988977	130510	Downstream	NPBWR1	NM_005285.3	protein_coding	NM_005285.3	protein_coding	CALL_431	10	HOM
LNCaP_C42b	DEL	chr8	67010824	67010827	0	Intron	DNAJC5B	chr8	67093674	67093677	0	Upstream	CRH	NM_033105.4	protein_coding	NM_000756.3	protein_coding	CALL_331	10	HET
LNCaP_C42b	DEL	chr2	34695829	34695832	168016	Downstream	LINC01317	chr2	34736565	34736568	161052	Upstream	LINC01320	NR_126403.1	pseudogene	NR_126404.1	pseudogene	CALL_279	Unchained	HET
LNCaP_C42b	UNK	chr2	38442939	38442956	28946	Downstream	CYP1B1-AS1	chr2	75063932	75063949	0	Intron	HK2	NR_027252.1	pseudogene	NM_000189.4	protein_coding	CALL_544	Unchained	HET
LNCaP_C42b	DEL	chr10	52794110	52794119	0	Intron	PRKG1	chr10	52826910	52826924	0	Intron	PRKG1	NM_001098512.2	protein_coding	NM_001098512.2	protein_coding	CALL_633	Unchained	HET
LNCaP_C42b	DUP	chr5	54953860	54953861	0	Intron	SLC38A9	chr5	55021306	55021309	7532	Upstream	DDX4	NR_047649.1	protein_coding	NM_024415.2	protein_coding	CALL_451	Unchained	HET
LNCaP_C42b	UNK	chr5	57147383	57147399	33768	Downstream	LOC101928539	chr5	58351948	58351964	0	Intron	PDE4D	NR_109900.1	pseudogene	NM_001197219.1	protein_coding	CALL_493	Unchained	HET
LNCaP_C42b	DUP	chr14	75379143	75379158	0	Intron	RPS6KL1	chr14	75516381	75516396	0	Downstream	ACYP1	NM_031464.4	protein_coding	NR_126395.1	protein_coding	CALL_485	11	HOM
LNCaP_C42b	DEL	chr14	86457731	86457741	0	Intron	LOC101928767	chr14	86489573	86489584	0	Intron	LOC101928767	NR_110155.1	pseudogene	NR_110155.1	pseudogene	CALL_301	11	HET
LNCaP_C42b	DEL	chr11	55349448	55349450	3912	Downstream	OR4C16	chr11	55758506	55758508	0	Downstream	OR5F1	NM_001004701.2	protein_coding	NM_003697.1	protein_coding	CALL_627	Unchained	HET
LNCaP_C42b	DEL	chr17	59957200	59957216	0	Intron	INTS2	chr17	60014400	60014416	559	Downstream	MED13	NM_020748.2	protein_coding	NM_005121.2	protein_coding	CALL_550	Unchained	HET
LNCaP_C42b	DUP	chr3	61155390	61155403	0	Intron	FHIT	chr3	61456146	61456159	86090	Upstream	PTPRG	NM_001320900.1	protein_coding	NM_002841.3	protein_coding	CALL_365	12	HOM
LNCaP_C42b	DUP	chr3	59760579	59760582	0	Intron	FHIT	chr3	60157385	60157387	0	Intron	FHIT	NM_001320900.1	protein_coding	NM_001320900.1	protein_coding	CALL_463	12	HOM
LNCaP_C42b	DEL	chr3	61019347	61019350	0	Intron	FHIT	chr3	61158811	61158814	0	Intron	FHIT	NM_001320900.1	protein_coding	NM_001320900.1	protein_coding	CALL_552	12	HET
LNCaP_C42b	DUP	chr6	76422040	76422055	0	Intron	SENP6	chr6	76646625	76646640	0	Intron	IMPG1	NM_001100409.2	protein_coding	NM_001282368.1	protein_coding	CALL_294	13	HOM
LNCaP_C42b	DEL	chr4	69373729	69373790	5407	Downstream	TMPRSS11E	chr4	69491080	69491089	16228	Downstream	UGT2B15	NM_014058.3	protein_coding	NM_001076.3	protein_coding	CALL_347	Unchained	HET
LNCaP_C42b	UNK	chr16	72109714	72109719	0	Intron	HPR	chr6	42175539	42175544	0	Exon	MRPS10	NM_020995.3	protein_coding	NM_018141.3	protein_coding	CALL_400	3	HET
LNCaP_C42b	UNK	chr12	71729039	71729040	99504	Upstream	LGR5	chr3	118694165	118694168	0	Intron	IGSF11	NR_110596.1	protein_coding	NM_152538.2	protein_coding	CALL_581	14	HET
LNCaP_C42b	DEL	chr16	78990980	78990996	0	Intron	WWOX	chr16	79219705	79219721	0	Intron	WWOX	NM_001291997.1	pseudogene	NM_001291997.1	pseudogene	CALL_585	Unchained	HET
LNCaP_C42b	UNK	chr10	75415178	75415179	0	Intron	SYNPO2L	chr16	29753289	29753290	0	Downstream	C16orf54	NM_001114133.2	protein_coding	NM_175900.3	protein_coding	CALL_482	15	HET
LNCaP_C42b	UNK	chr10	86115758	86115777	0	Intron	CCSER2	chr10	96581442	96581461	0	Intron	CYP2C19	NM_001284241.1	protein_coding	NM_000769.2	protein_coding	CALL_453	15	HET
LNCaP_C42b	UNK	chr10	86250979	86250980	0	Intron	CCSER2	chr10	96181620	96181621	0	Intron	TBC1D12	NM_001284240.1	protein_coding	NM_015188.1	protein_coding	CALL_595	15	HET
LNCaP_C42b	DEL	chr4	92288790	92288793	0	Intron	CCSER1	chr4	92426226	92426229	0	Intron	CCSER1	NM_001145065.1	protein_coding	NM_001145065.1	protein_coding	CALL_369	Unchained	HET
LNCaP_C42b	DEL	chr17	1787077	1787089	0	Intron	RPA1	chr17	1831356	1831370	1608	Downstream	RTN4RL1	NM_002945.3	protein_coding	NM_178568.3	protein_coding	CALL_610	Unchained	HET
LNCaP_C42b	DUP	chr12	81716882	81716906	0	Intron	PPFIA2	chr12	81958148	81958172	0	Intron	PPFIA2	NM_001220478.2	protein_coding	NM_001220478.2	protein_coding	CALL_608	Unchained	HOM
LNCaP_C42b	UNK	chr1	86035492	86035497	0	Intron	DDAH1	chr15	77331490	77331491	0	Downstream	TSPAN3	NM_001134445.1	protein_coding	NM_001168412.1	protein_coding	CALL_398	Unchained	HET
LNCaP_C42b	DUP	chr5	11881929	11881932	0	Intron	CTNND2	chr5	12310796	12310799	259166	Upstream	LINC01194	NM_001288717.1	protein_coding	NR_033383.1	pseudogene	CALL_605	Unchained	HOM
LNCaP_C42b	DEL	chr4	34779936	34779957	733421	Upstream	LOC101928622	chr4	34828932	34828945	782417	Upstream	LOC101928622	NR_125902.1	pseudogene	NR_125902.1	pseudogene	CALL_243	Unchained	HET
LNCaP_C42b	DEL	chr3	129763382	129763389	32285	Upstream	ALG1L2	chr3	129806732	129806746	0	Intron	ALG1L2	NM_001136152.1	protein_coding	NM_001136152.1	protein_coding	CALL_189	14	HET
LNCaP_C42b	UNK	chr10	96453397	96453402	0	Intron	CYP2C18	chr6	160112763	160112768	0	Exon	SOD2	NM_000772.2	protein_coding	NM_001322816.1	protein_coding	CALL_414	Unchained	HET
LNCaP_C42b	UNK	chr4	97998748	97998749	284322	Upstream	STPG2-AS1	chr6	87535390	87535396	106627	Upstream	HTR1E	NR_102713.1	pseudogene	NM_000865.2	protein_coding	CALL_355	13	HET
LNCaP_C42b	DUP	chr4	101836582	101836587	102998	Downstream	PPP3CA	chr4	102112892	102112905	0	Intron	PPP3CA	NM_001130691.1	protein_coding	NM_001130691.1	protein_coding	CALL_532	13	HOM
LNCaP_C42b	DUP	chr4	120664424	120664439	50830	Downstream	LINC01365	chr4	120896920	120896935	6472	Downstream	LOC100996694	NR_110660.1	pseudogene	NR_121639.1	pseudogene	CALL_573	13	HOM
LNCaP_C42b	DEL	chr12	99710210	99710213	0	Intron	ANKS1B	chr12	99841701	99841704	0	Intron	ANKS1B	NM_152788.4	protein_coding	NM_152788.4	protein_coding	CALL_554	Unchained	HET
VCaP	DEL	chr4	102444413	102444416	169373	Downstream	FLJ20021	chr4	102490715	102490718	215675	Downstream	FLJ20021	NR_033874.1	pseudogene	NR_033874.1	pseudogene	CALL_809	Unchained	HET
VCaP	UNK	chr6	11480119	11480126	53334	Upstream	TMEM170B	chr6	19835857	19835872	0	Upstream	ID4	NM_001100829.2	protein_coding	NM_001546.3	protein_coding	CALL_478	Unchained	HET
VCaP	UNK	chr5	112343173	112343189	0	Intron	DCP2	chr5	154425389	154425405	22697	Downstream	KIF4B	NM_152624.5	protein_coding	NM_001099293.2	protein_coding	CALL_1094	1	HET
VCaP	UNK	chr5	113314079	113314151	378095	Downstream	YTHDC2	chr5	119079960	119079973	103443	Downstream	FAM170A	NM_022828.3	protein_coding	NM_001163991.1	protein_coding	CALL_1106	1	HET
VCaP	UNK	chr5	113919943	113919956	0	Intron	LOC101927078	chr5	159966389	159966404	18731	Downstream	ATP10B	NR_130785.1	pseudogene	NM_025153.2	protein_coding	CALL_979	2	HET
VCaP	UNK	chr3	114268800	114268813	0	Intron	ZBTB20	chr3	115903018	115903031	0	Intron	LSAMP	NM_015642.5	protein_coding	NM_001318915.1	protein_coding	CALL_1148	3	HET
VCaP	DUP	chr3	117040740	117040742	384655	Downstream	LINC00901	chr3	117623474	117623476	598776	Downstream	LOC105374060	NR_121607.1	pseudogene	NR_135547.1	pseudogene	CALL_1205	3	HOM
VCaP	UNK	chr12	114991631	114991645	111420	Downstream	TBX3	chr12	116103157	116103171	288216	Downstream	MED13L	NM_016569.3	protein_coding	NM_015335.4	protein_coding	CALL_1076	Unchained	HET
VCaP	DISTAL	chr10	116012492	116012494	0	Intron	VWA2	chr14	61863837	61863839	0	Intron	PRKCH	NM_001272046.1	protein_coding	NM_006255.4	protein_coding	CALL_1152	Unchained	HET
VCaP	DEL	chr12	12688192	12688202	0	Intron	DUSP16	chr12	12883656	12883670	0	Intron	APOLD1	NM_030640.2	protein_coding	NM_001130415.1	protein_coding	CALL_900	Unchained	HET
VCaP	UNK	chr11	12872013	12872029	0	Intron	TEAD1	chr11	17216645	17216661	0	Intron	PIK3C2A	NM_021961.5	protein_coding	NM_001321378.1	protein_coding	CALL_1197	Unchained	HET
VCaP	UNK	chr8	120743788	120743802	0	Exon	TAF2	chr8	137181348	137181359	516496	Downstream	KHDRBS3	NM_003184.3	protein_coding	NM_006558.2	protein_coding	CALL_1013	4	HET
VCaP	UNK	chr8	121924244	121924261	94935	Upstream	SNTB1	chr8	139628623	139628640	0	Intron	COL22A1	NM_021021.3	protein_coding	NM_152888.2	protein_coding	CALL_1047	4	HET
VCaP	DUP	chr8	127980485	127980496	39907	Upstream	PCAT1	chr8	128205044	128205059	0	Intron	CASC19	NR_045262.1	pseudogene	NR_120364.1	pseudogene	CALL_608	Unchained	HOM
VCaP	DISTAL	chr12	123456128	123456130	0	Upstream	OGFOD2	chr16	84746250	84746252	0	Intron	USP10	NM_001304836.1	protein_coding	NR_073577.1	protein_coding	CALL_1198	5	HET
VCaP	UNK	chr12	123456484	123456488	0	Upstream	OGFOD2	chr21	40547371	40547375	0	Exon	PSMG1	NM_001304836.1	protein_coding	NM_003720.3	protein_coding	CALL_953	5	HET
VCaP	DISTAL	chr5	127601518	127601520	0	Intron	FBN2	chr5	157493382	157493384	202199	Upstream	CLINT1	NM_001999.3	protein_coding	NM_001195555.1	protein_coding	CALL_1227	2	HET
VCaP	DEL	chr3	129763364	129763372	32303	Upstream	ALG1L2	chr3	129806733	129806746	0	Intron	ALG1L2	NM_001136152.1	protein_coding	NM_001136152.1	protein_coding	CALL_999	Unchained	HET
VCaP	DEL	chr6	135425243	135425253	44207	Upstream	HBS1L	chr6	135846251	135846268	0	Intron	LINC00271	NM_001145158.1	protein_coding	NR_026805.1	pseudogene	CALL_980	Unchained	HET
VCaP	UNK	chr5	136397952	136397965	0	Intron	SPOCK1	chr5	179305311	179305324	0	Exon	TBC1D9B	NM_004598.3	protein_coding	NM_015043.3	protein_coding	CALL_1184	2	HET
VCaP	UNK	chr5	136490516	136490534	0	Intron	SPOCK1	chr5	180132128	180132146	28987	Downstream	OR2Y1	NM_004598.3	protein_coding	NM_001001657.1	protein_coding	CALL_1164	2	HET
VCaP	DEL	chr20	1561072	1561082	0	Intron	SIRPB1	chr20	1594174	1594187	0	Intron	SIRPB1	NM_001083910.3	protein_coding	NM_001135844.3	protein_coding	CALL_495	Unchained	HOM
VCaP	DISTAL	chr5	142584481	142584483	0	Intron	ARHGAP26	chr5	155608326	155608328	140433	Upstream	SGCD	NM_001135608.1	protein_coding	NM_000337.5	protein_coding	CALL_1126	2	HET
VCaP	UNK	chr5	142787521	142787535	0	Intron	NR3C1	chr5	152524317	152524331	167408	Upstream	LINC01470	NM_001018074.1	protein_coding	NR_109877.1	pseudogene	CALL_1185	2	HET
VCaP	DISTAL	chr5	142787681	142787683	0	Intron	NR3C1	chr5	175115618	175115620	0	Downstream	HRH2	NM_001018074.1	protein_coding	NM_022304.2	protein_coding	CALL_1095	2	HET
VCaP	UNK	chr5	150389189	150389209	5776	Upstream	GPX3	chr5	165457214	165457234	870005	Downstream	CTB-7E3.1	NM_001329790.1	protein_coding	NR_108020.1	pseudogene	CALL_1186	2	HET
VCaP	UNK	chr5	152528967	152528980	172058	Upstream	LINC01470	chr5	175115618	175115619	0	Downstream	HRH2	NR_109877.1	pseudogene	NM_022304.2	protein_coding	CALL_1187	2	HET
VCaP	DISTAL	chr5	152665942	152665944	199135	Upstream	GRIA1	chr5	180479109	180479111	0	Intron	BTNL9	NM_001114183.1	protein_coding	NM_001308245.1	protein_coding	CALL_791	2	HET
VCaP	DISTAL	chr5	157049010	157049012	0	Downstream	SOX30	chr5	180464660	180464662	0	Upstream	BTNL9	NM_001308165.1	protein_coding	NM_001308245.1	protein_coding	CALL_1188	2	HET
VCaP	UNK	chr5	158754335	158754356	0	Intron	IL12B	chr5	170977284	170977303	87654	Downstream	FGF18	NM_002187.2	protein_coding	NM_003862.2	protein_coding	CALL_1059	2	HET
VCaP	UNK	chr5	161033971	161033977	53841	Upstream	GABRB2	chr5	173376273	173376287	0	Intron	CPEB4	NM_021911.2	protein_coding	NM_001308189.1	protein_coding	CALL_1207	2	HET
VCaP	DEL	chr1	152555542	152555558	0	Upstream	LCE3D	chr1	152587725	152587741	0	Downstream	LCE3B	NM_032563.1	protein_coding	NM_178433.1	protein_coding	CALL_533	Unchained	HOM
VCaP	UNK	chr4	163105025	163105039	14839	Upstream	FSTL5	chr4	172337096	172337110	224653	Downstream	MIR6082	NM_020116.4	protein_coding	NR_106730.1	pseudogene	CALL_1149	Unchained	HET
VCaP	INV	chr5	165478111	165478126	849108	Downstream	CTB-7E3.1	chr5	165549398	165549444	777821	Downstream	CTB-7E3.1	NR_108020.1	pseudogene	NR_108020.1	pseudogene	CALL_1165	2	HET
VCaP	DUP	chr12	17923248	17923250	91920	Downstream	MIR3974	chr12	18071563	18071565	157232	Downstream	RERGL	NR_039770.1	pseudogene	NR_104413.1	protein_coding	CALL_1214	6	HOM
VCaP	UNK	chr12	17927781	17927782	96453	Downstream	MIR3974	chr12	18001131	18001136	169803	Downstream	MIR3974	NR_039770.1	pseudogene	NR_039770.1	pseudogene	CALL_774	6	HET
[truncated: 740 more rows]

[truncated: 3 more sheets: Table S11, Table S12, Table S13]
